# Supplementary material for: iPSC-Derived Retina Transplants Improve Vision in rd1 End-Stage Retinal-Degeneration Mice
Source: PubMed Central journal article supplement — Stem Cell Reports. 2017 Jan 10;8(1):69–83. doi: 10.1016/j.stemcr.2016.12.008 (PMC5233464; doi:10.1016/j.stemcr.2016.12.008), 2017-01-10

# Teaching dataset: Automatic clustering + Mandai modification (20160623125739) (page 1/54)

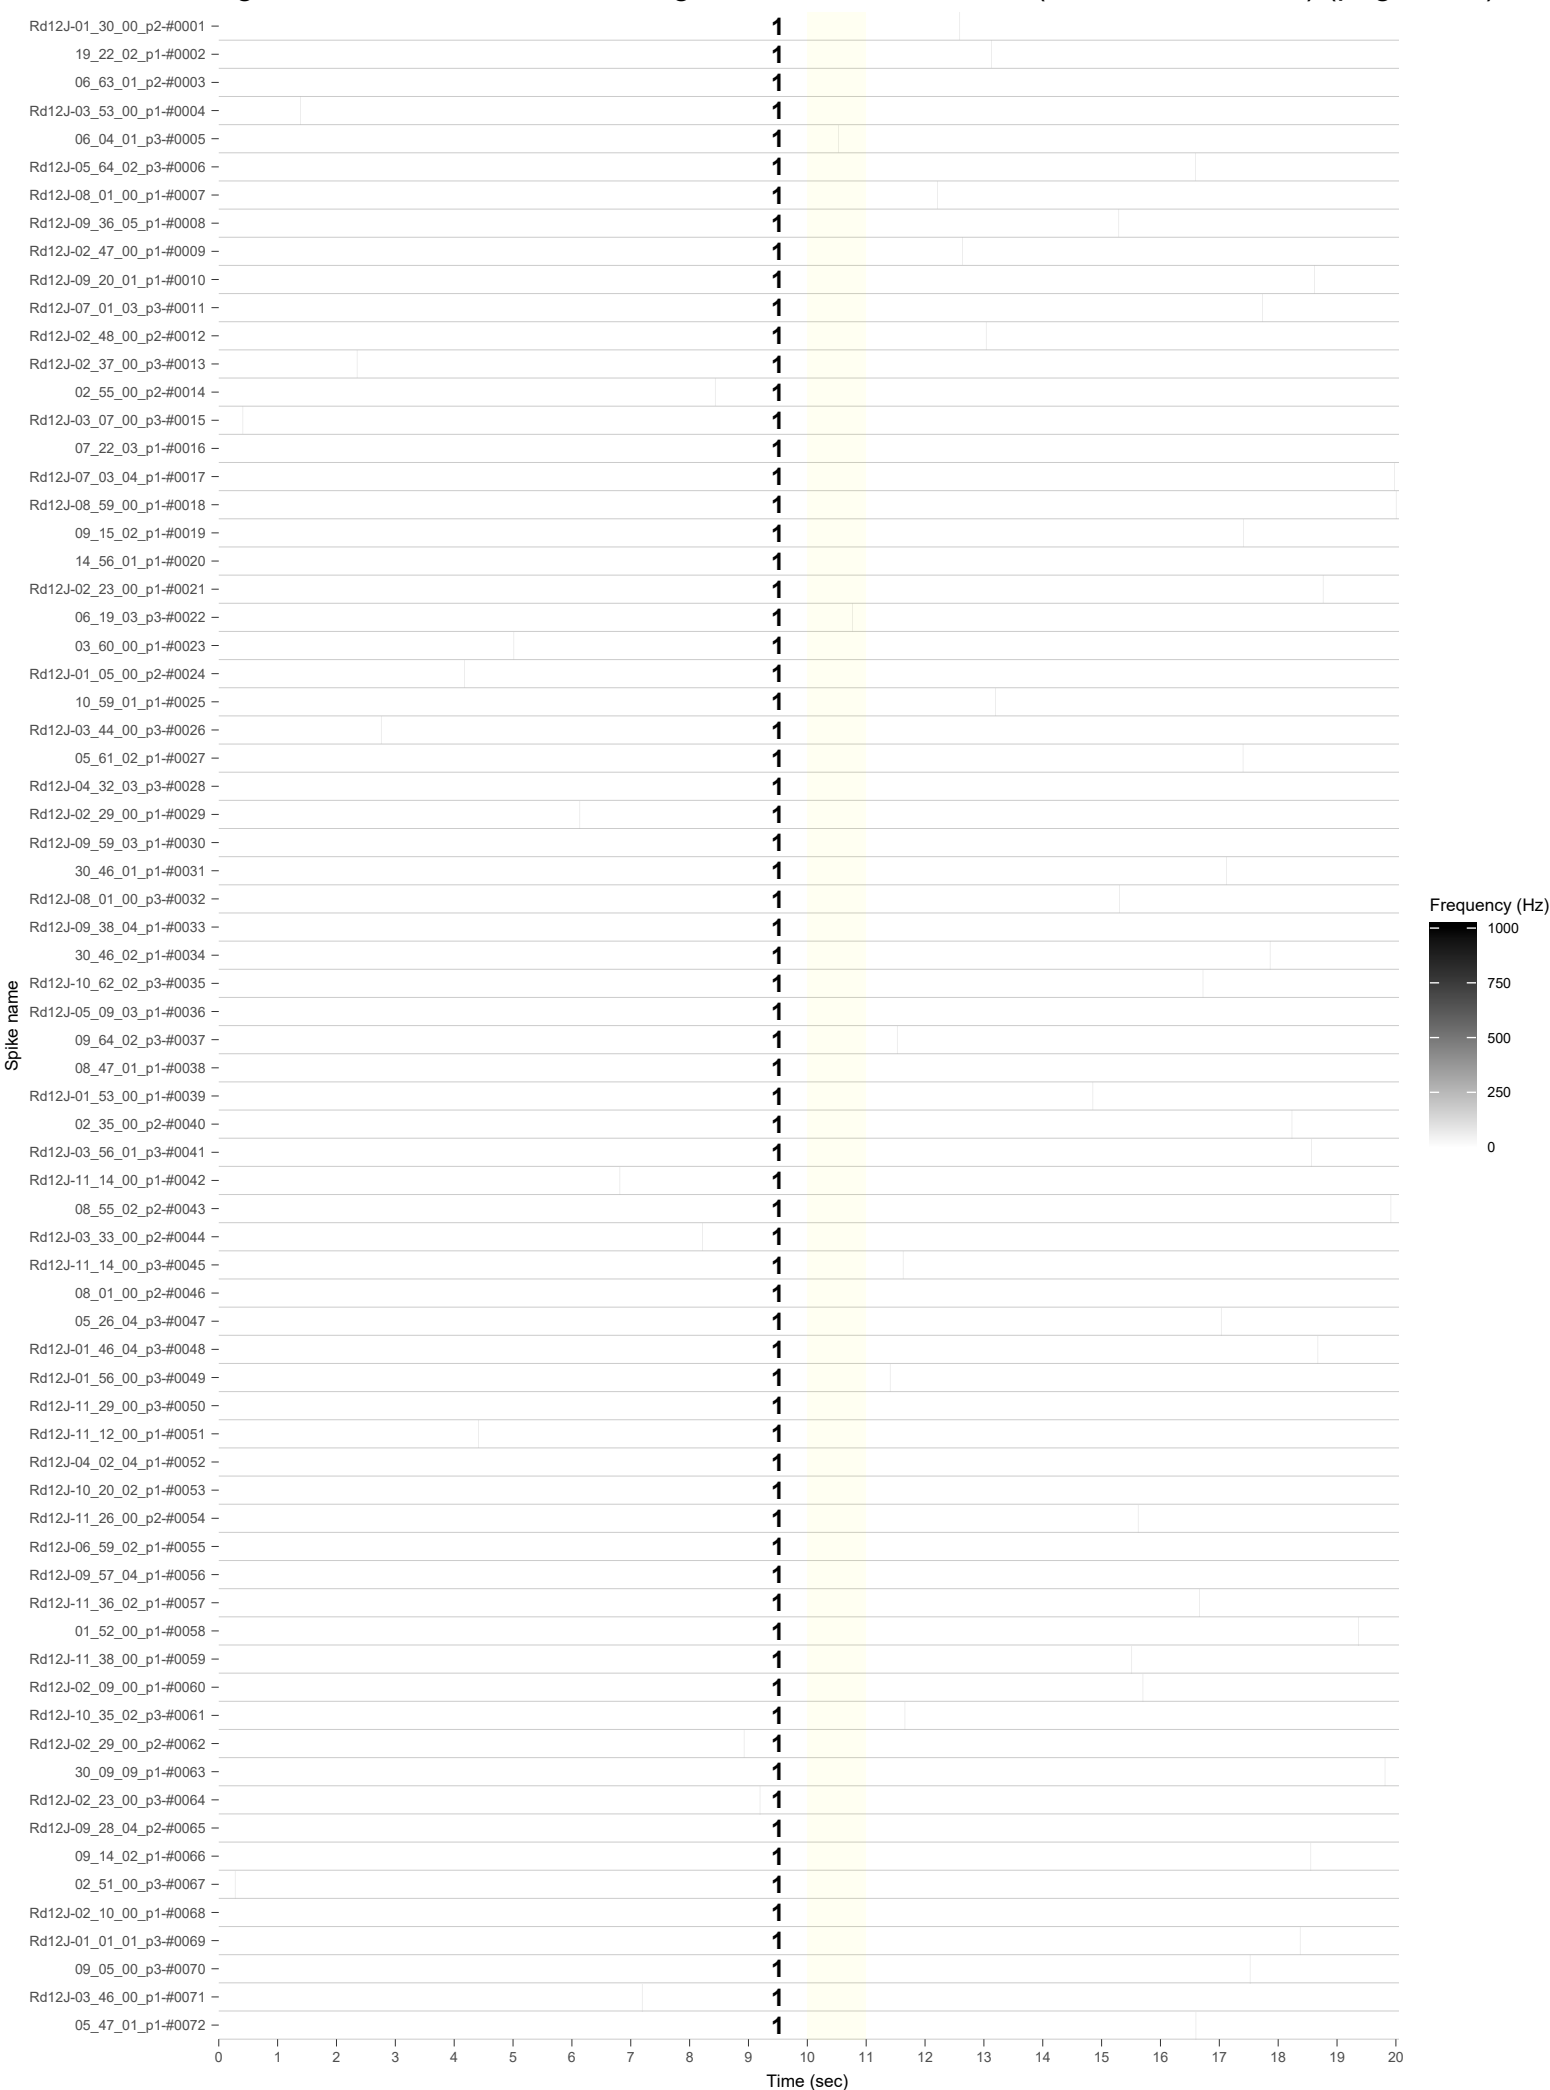

# Teaching dataset: Automatic clustering + Mandai modification (20160623125739) (page 2/54)

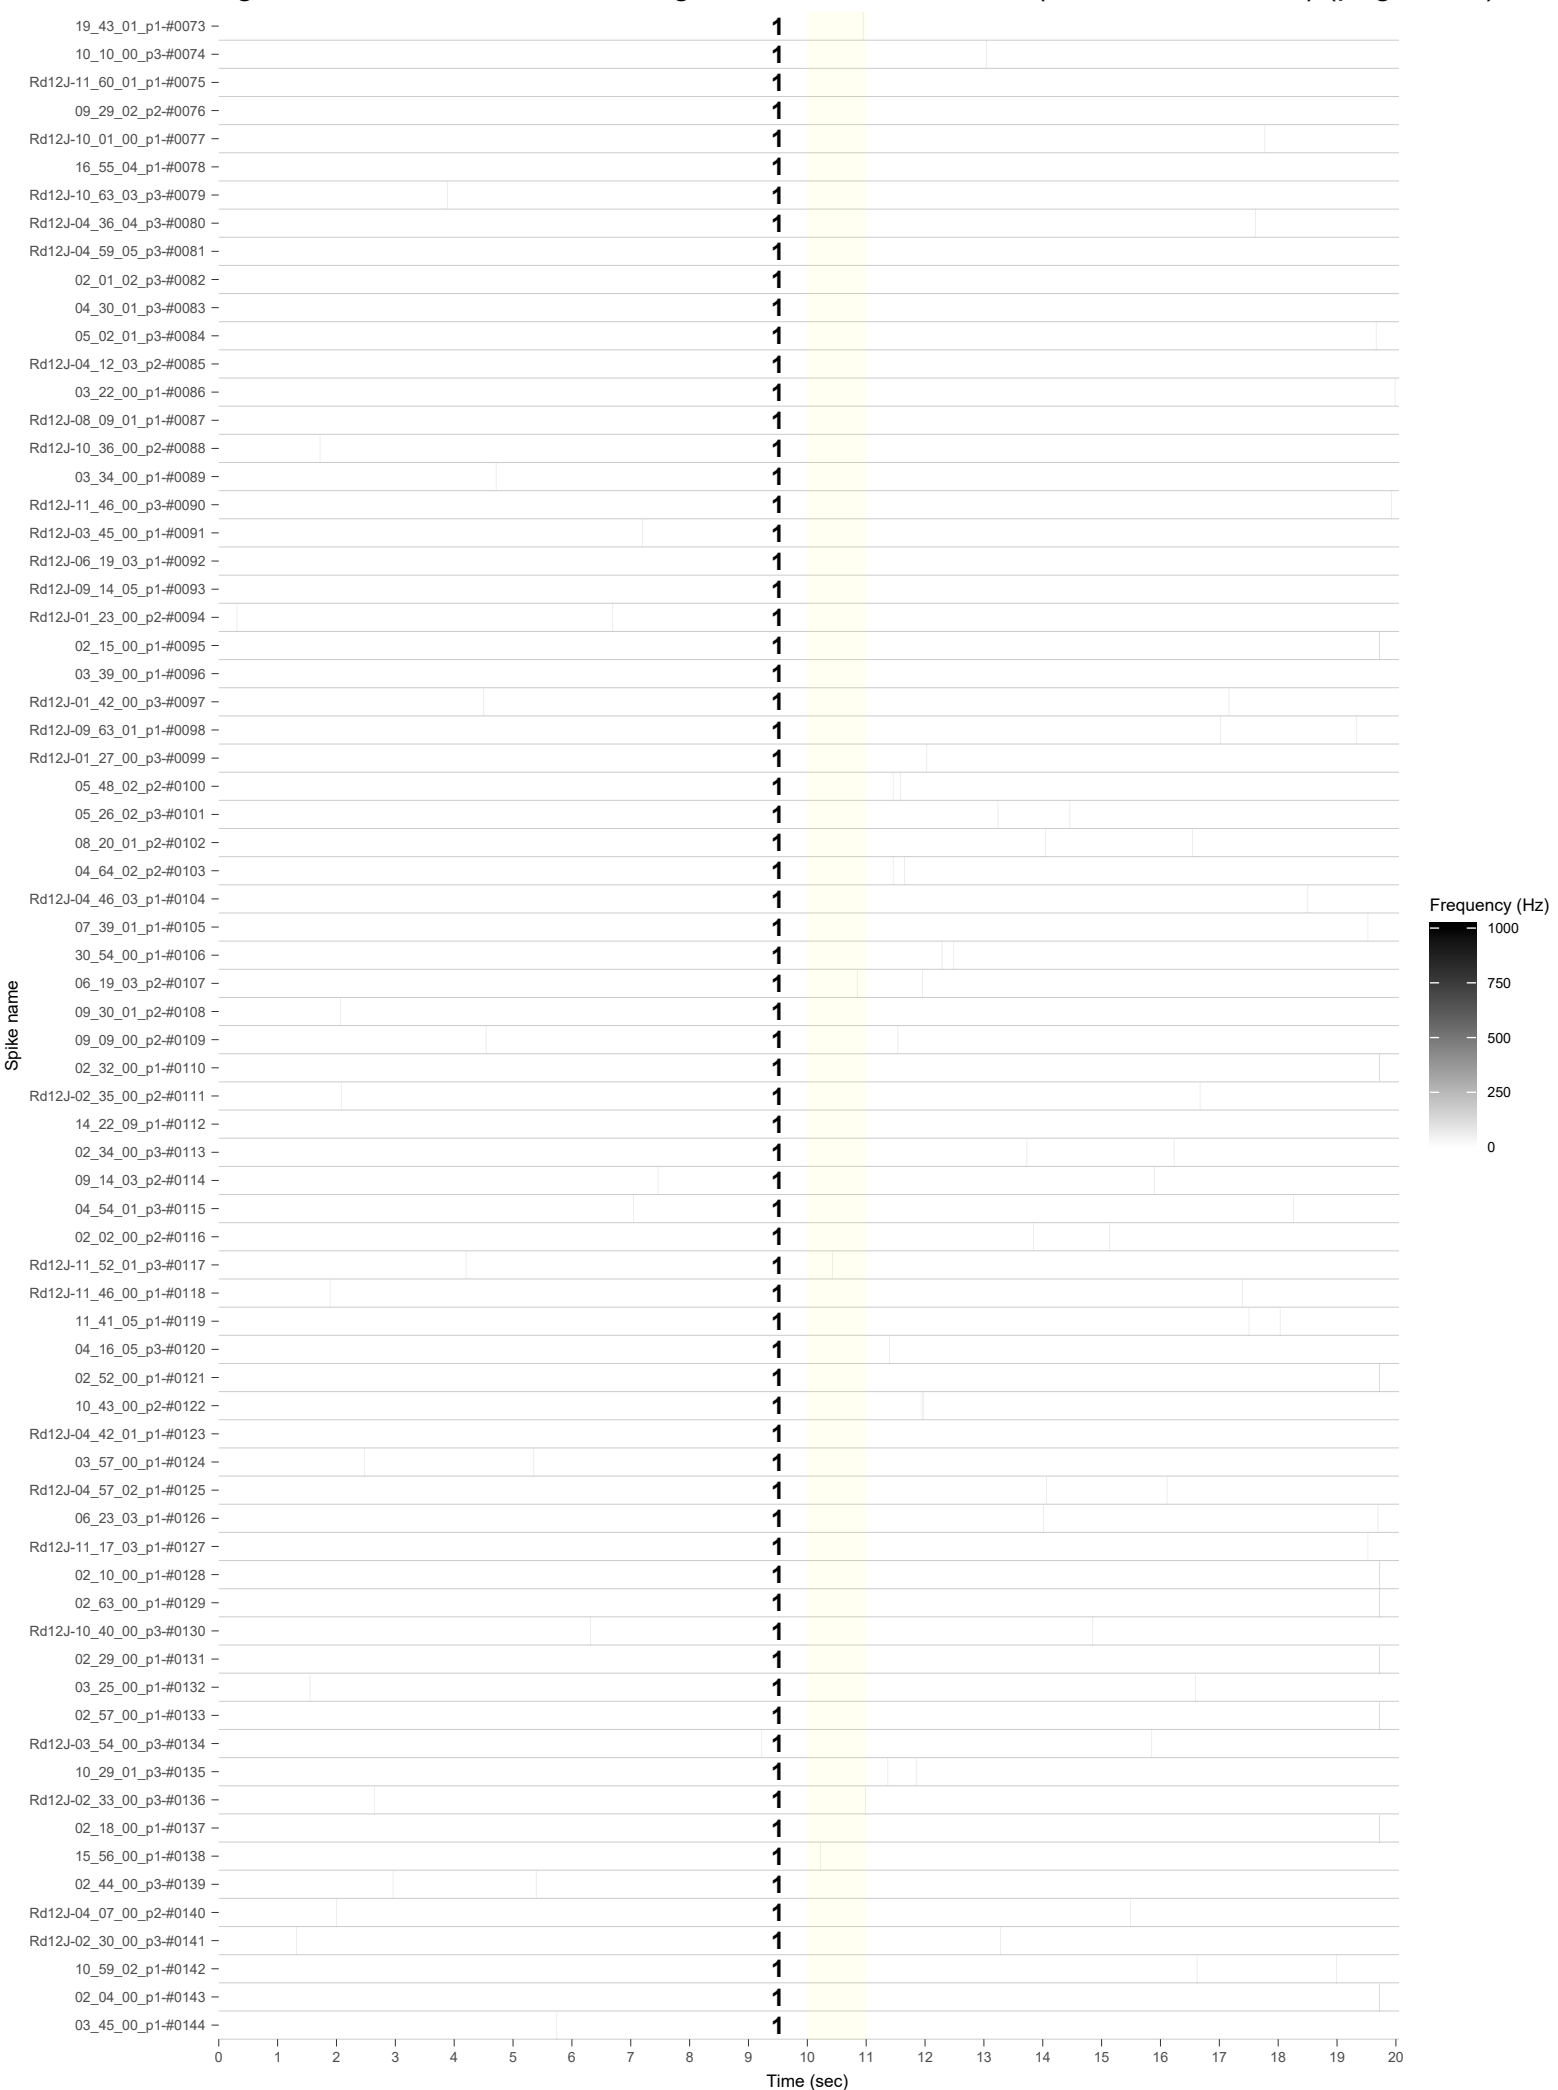

# Teaching dataset: Automatic clustering + Mandai modification (20160623125739) (page 3/54)

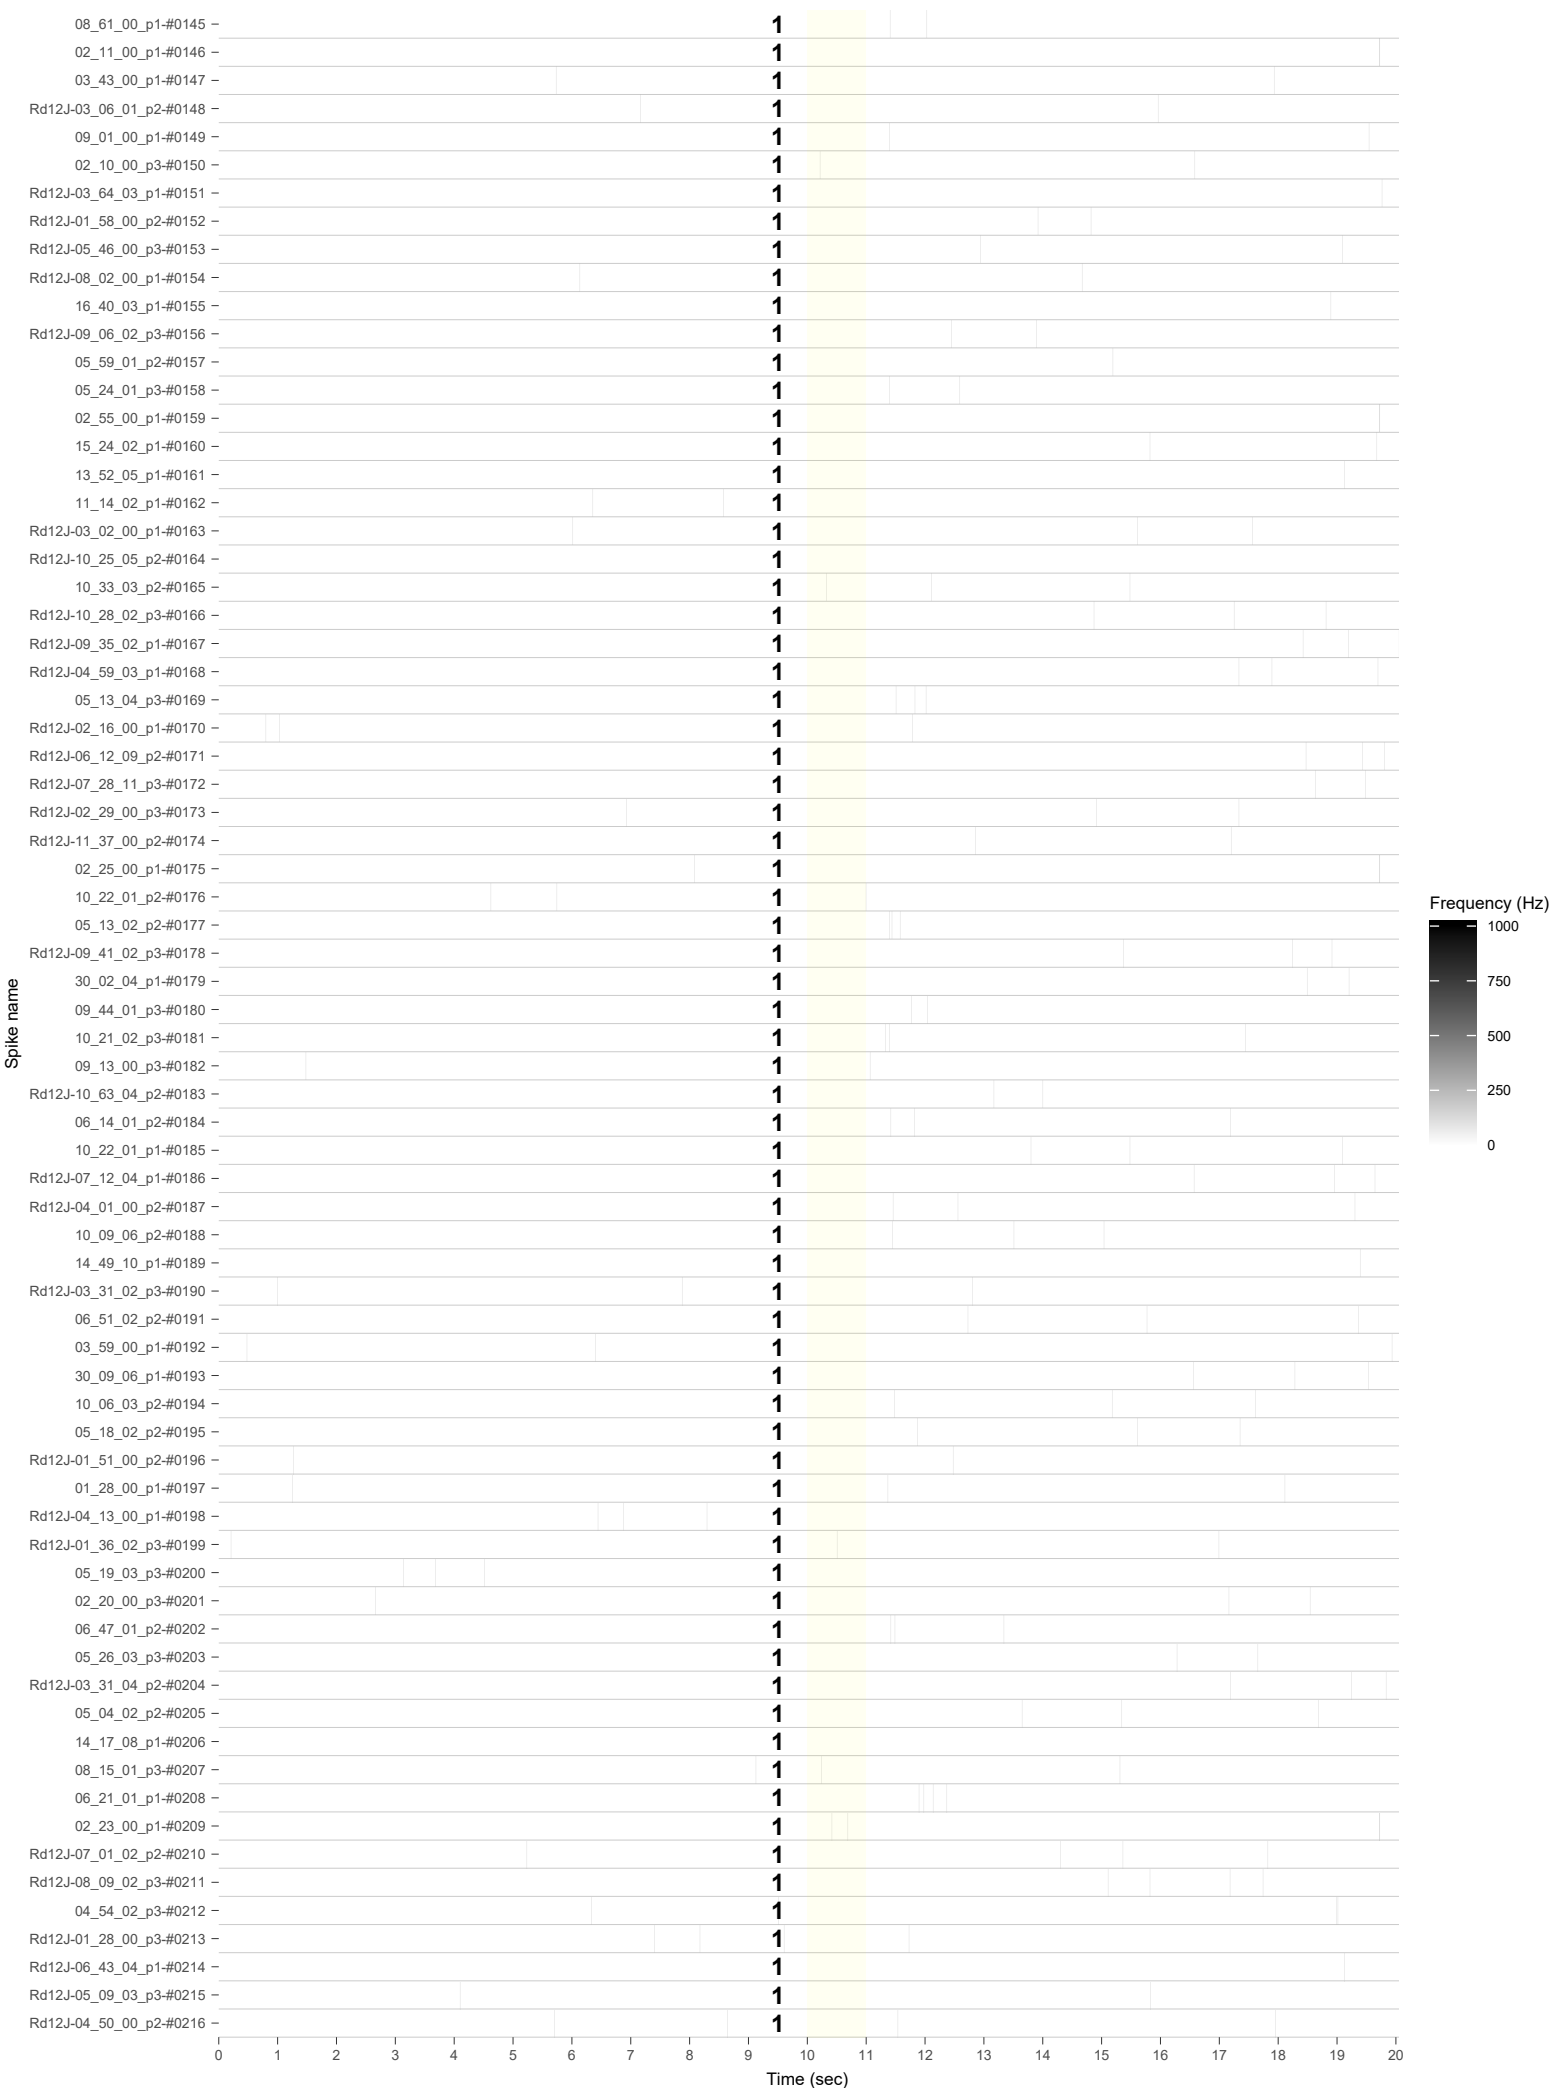

# Teaching dataset: Automatic clustering + Mandai modification (20160623125739) (page 4/54)

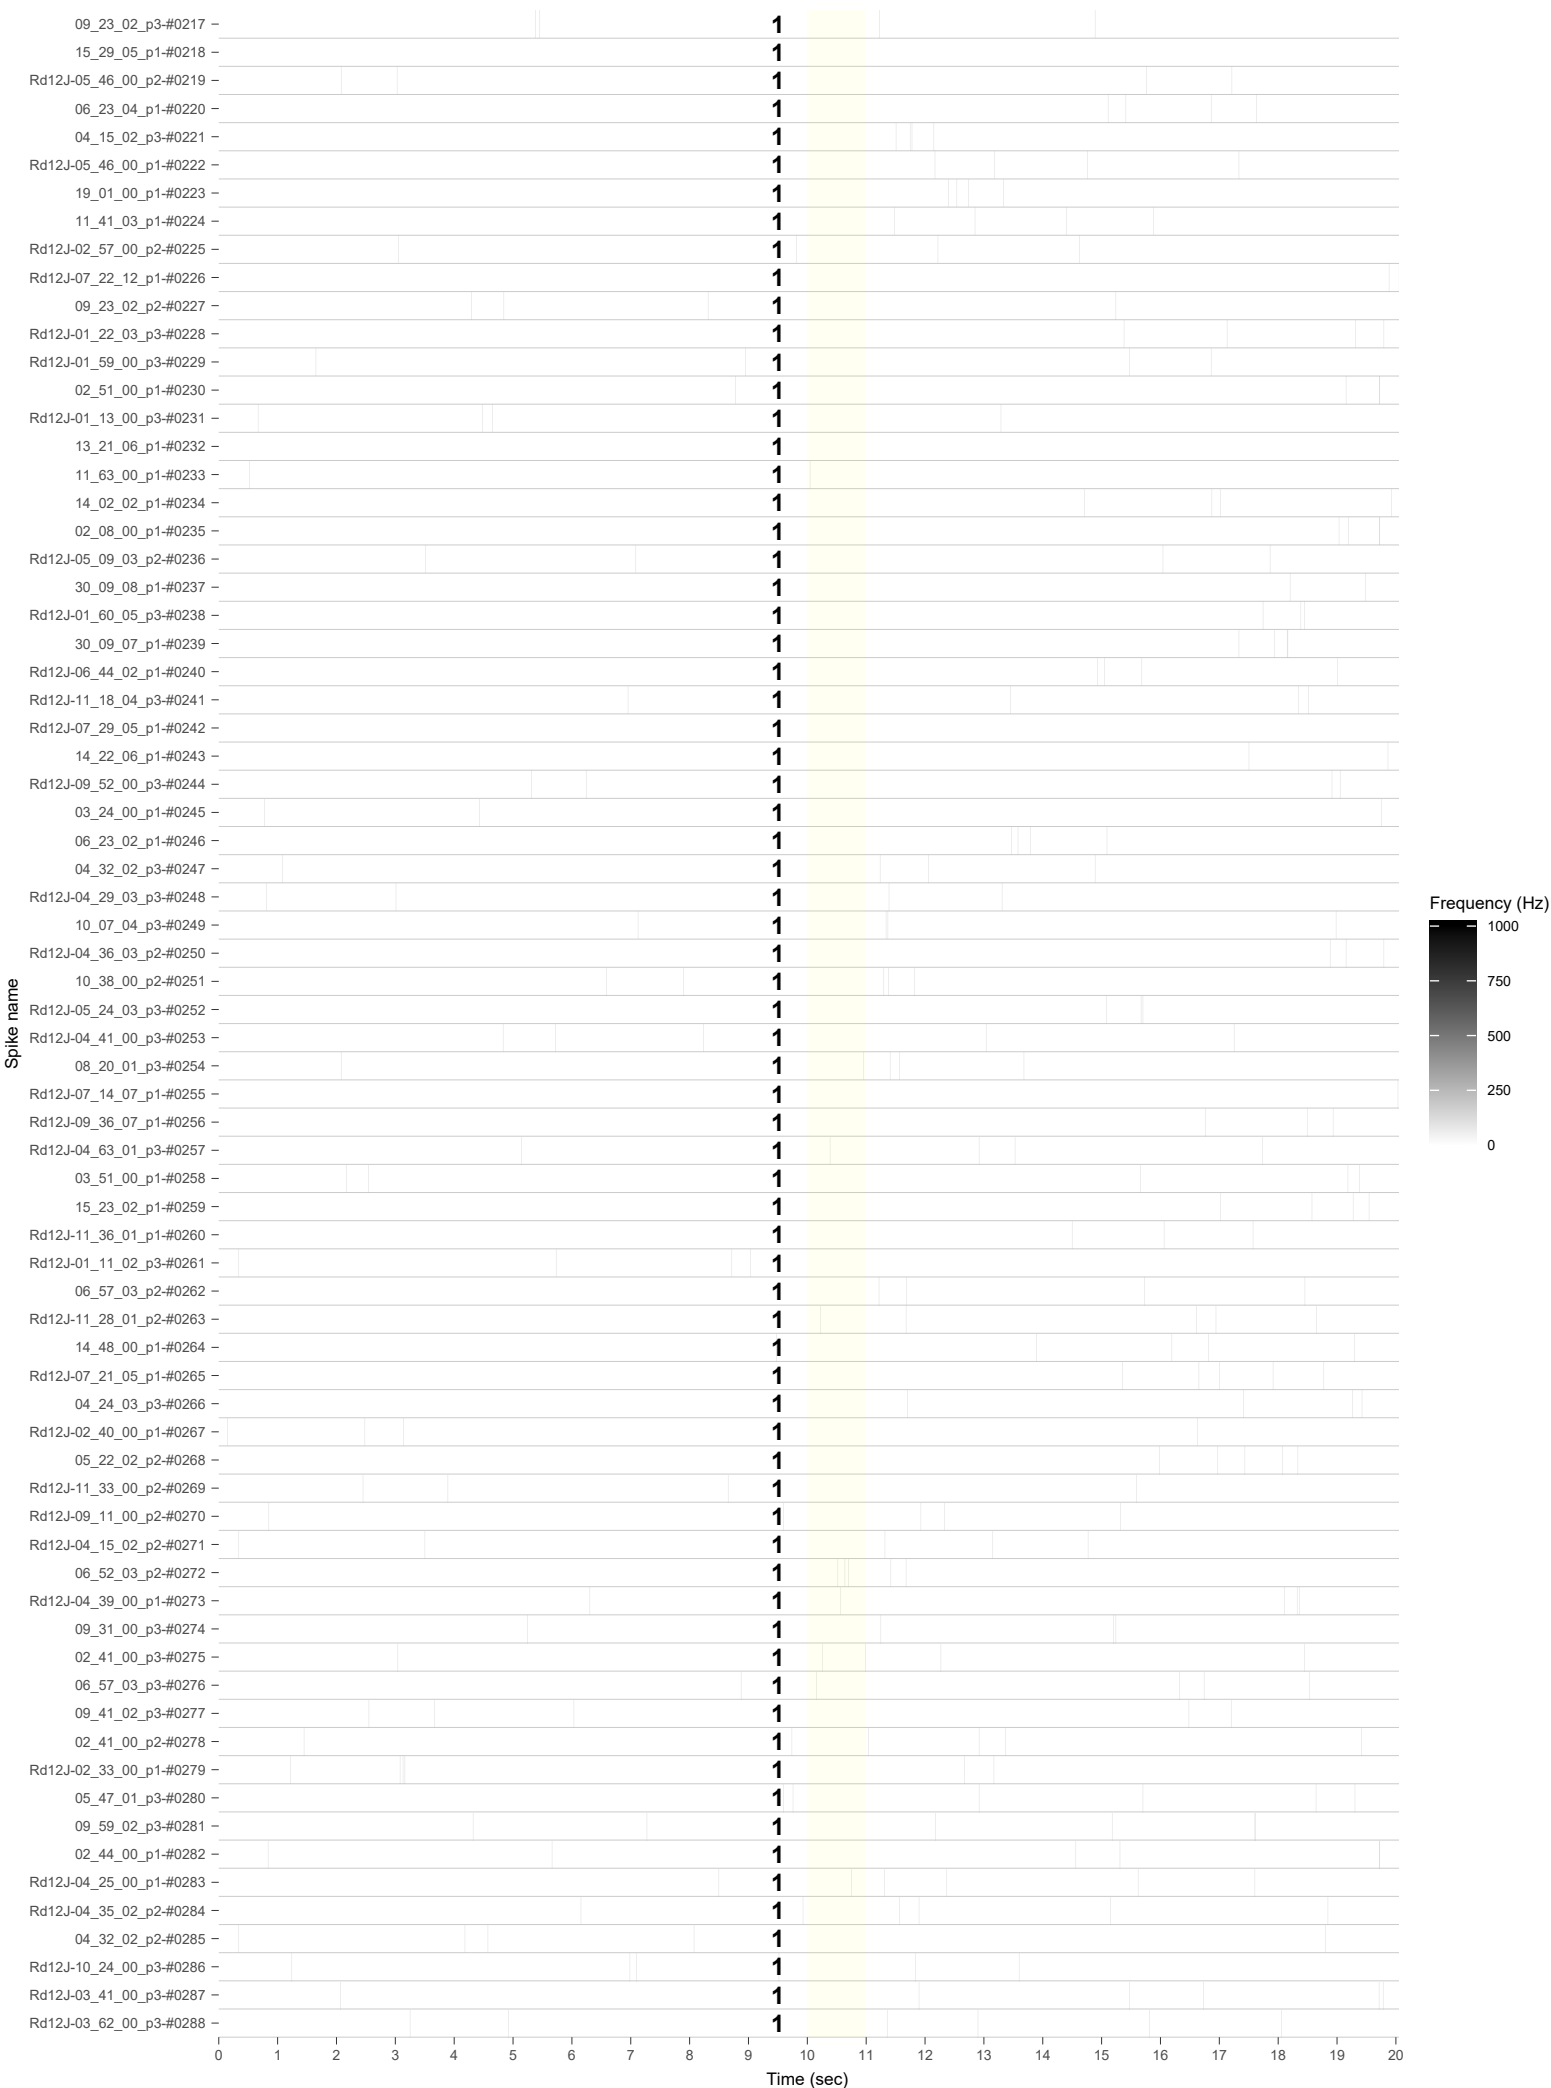

# Teaching dataset: Automatic clustering + Mandai modification (20160623125739) (page 5/54)

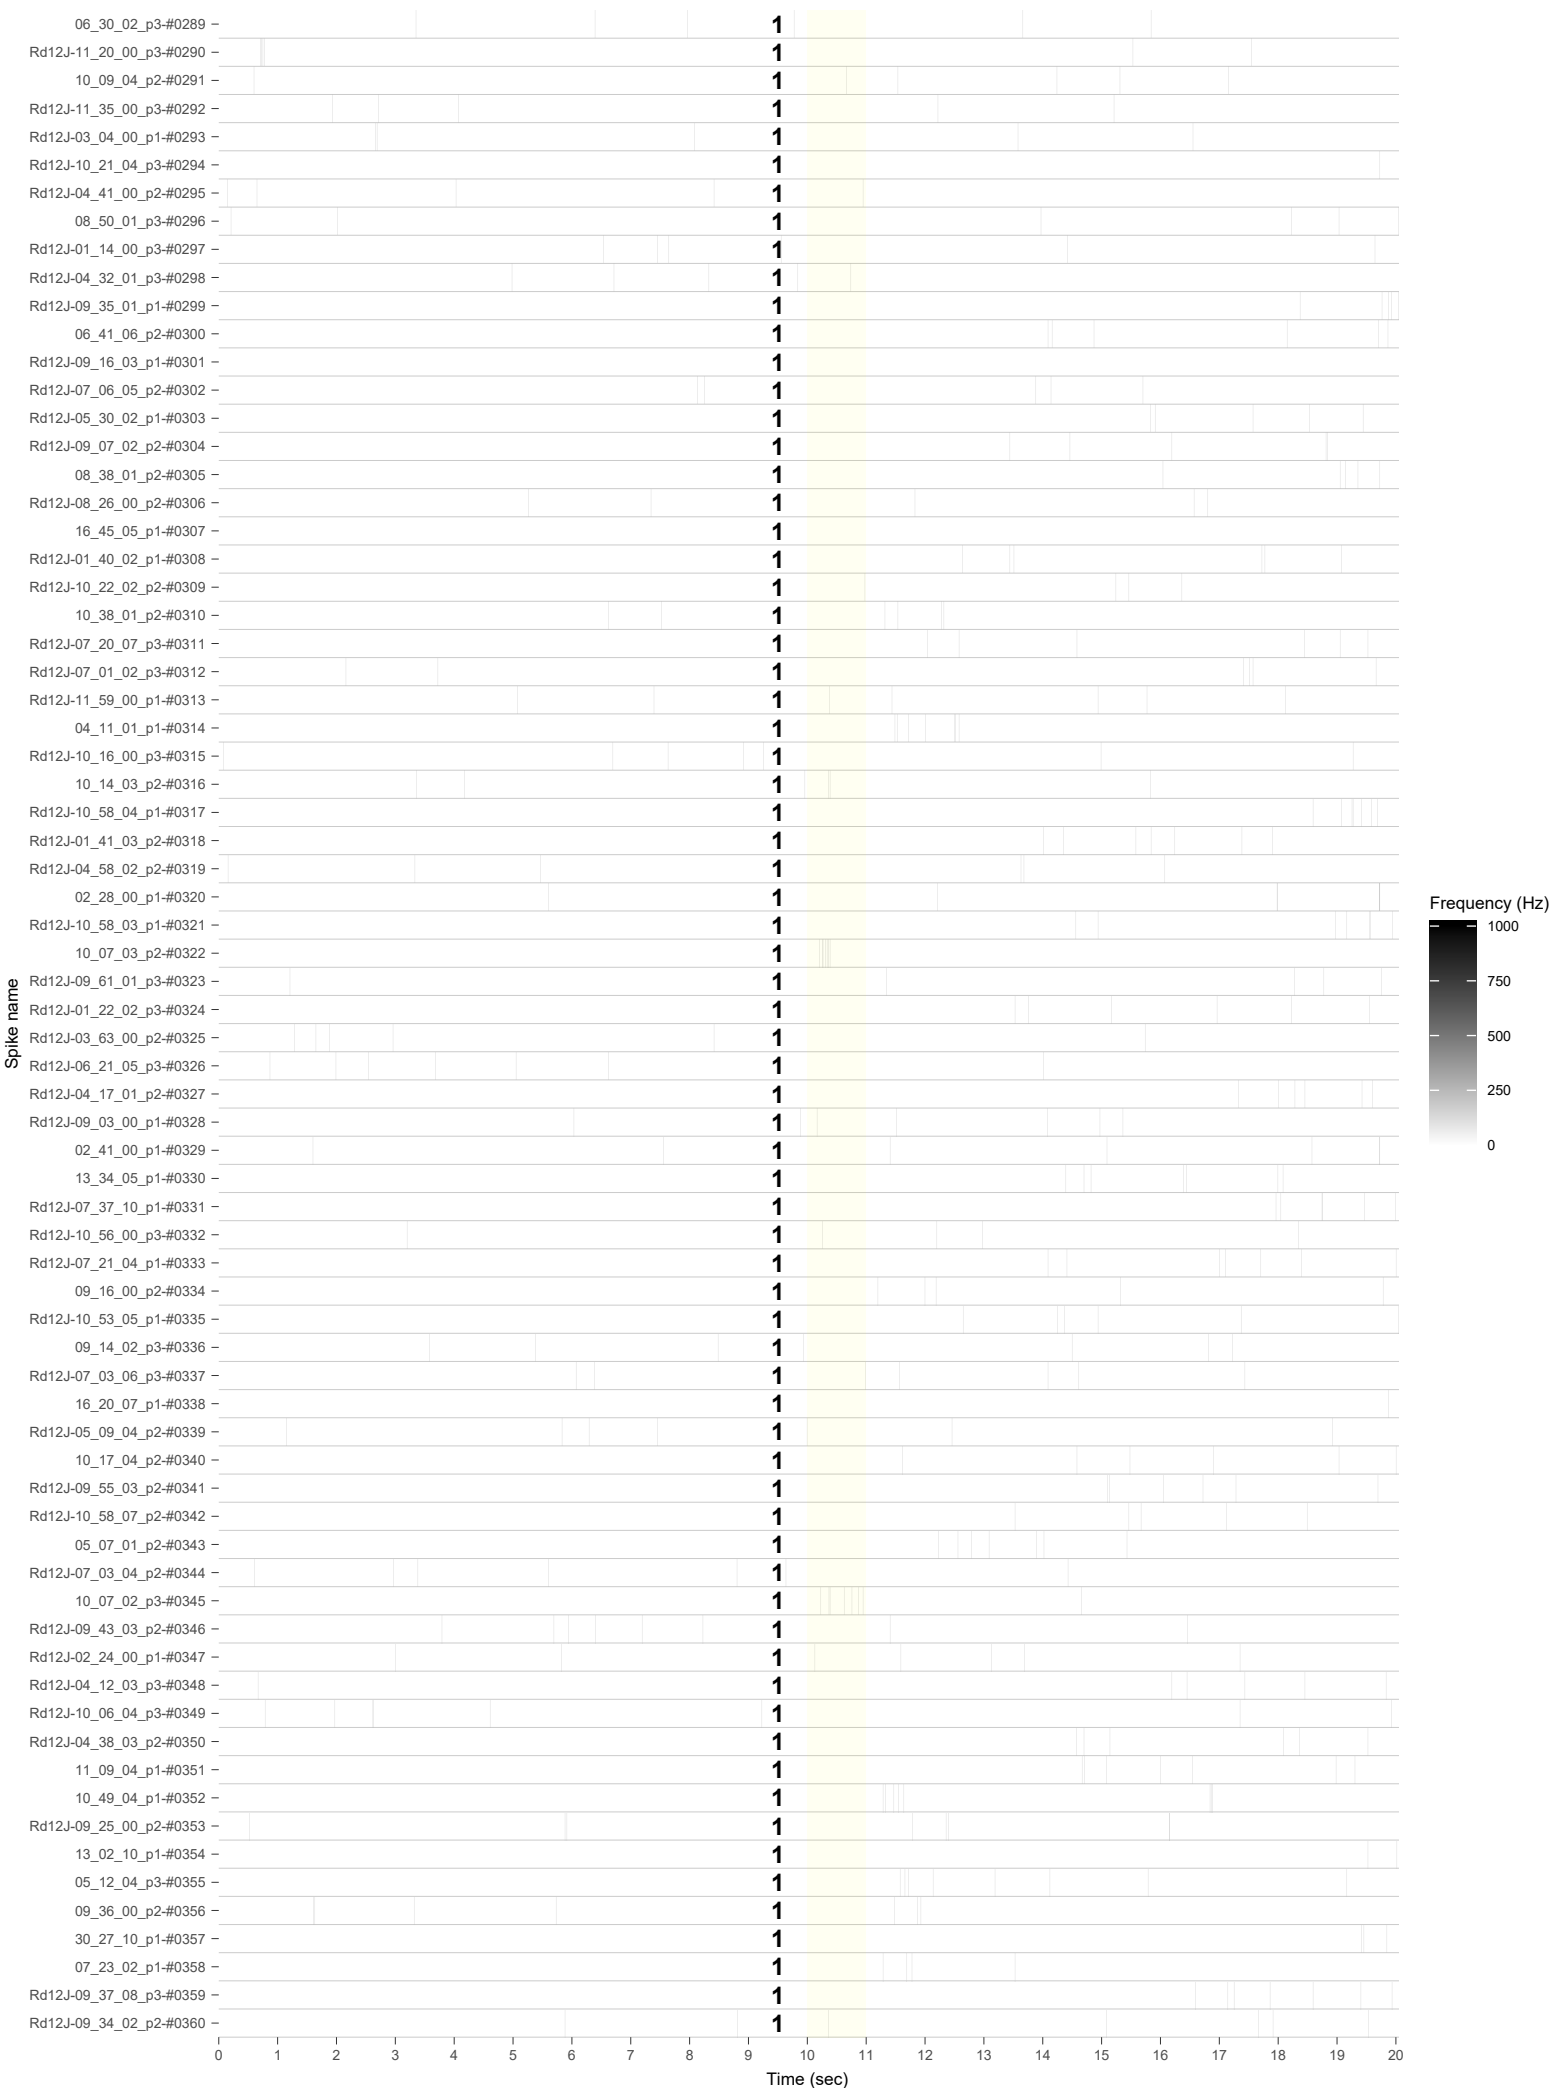

# Teaching dataset: Automatic clustering + Mandai modification (20160623125739) (page 6/54)

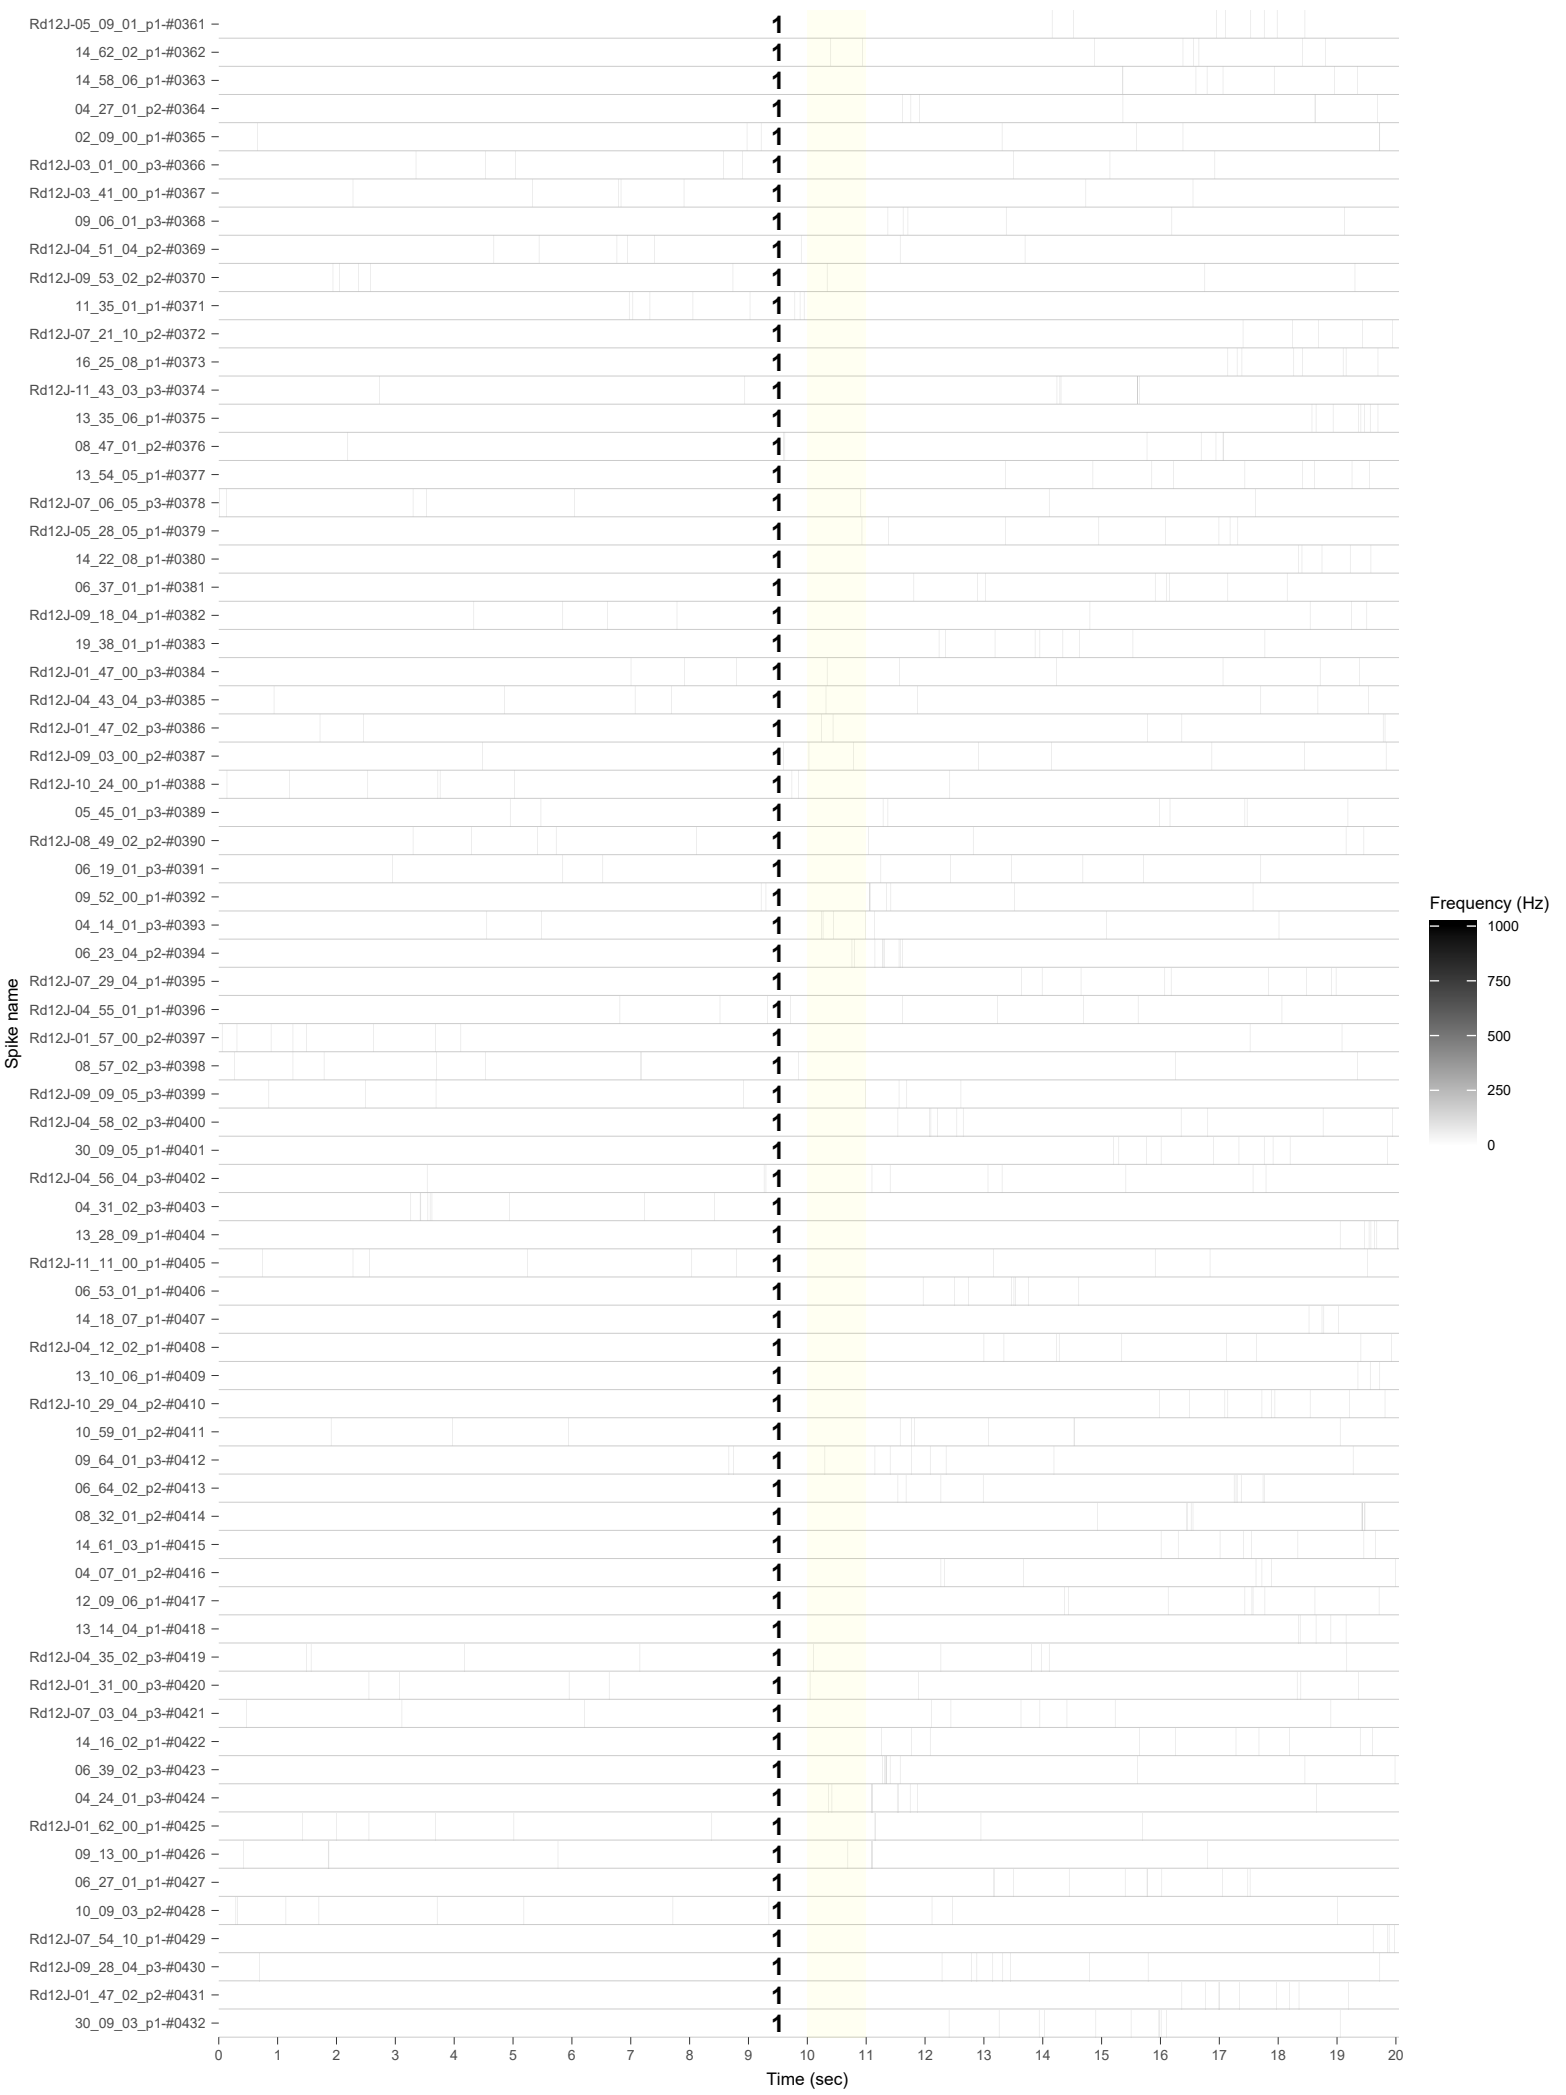

# Teaching dataset: Automatic clustering + Mandai modification (20160623125739) (page 7/54)

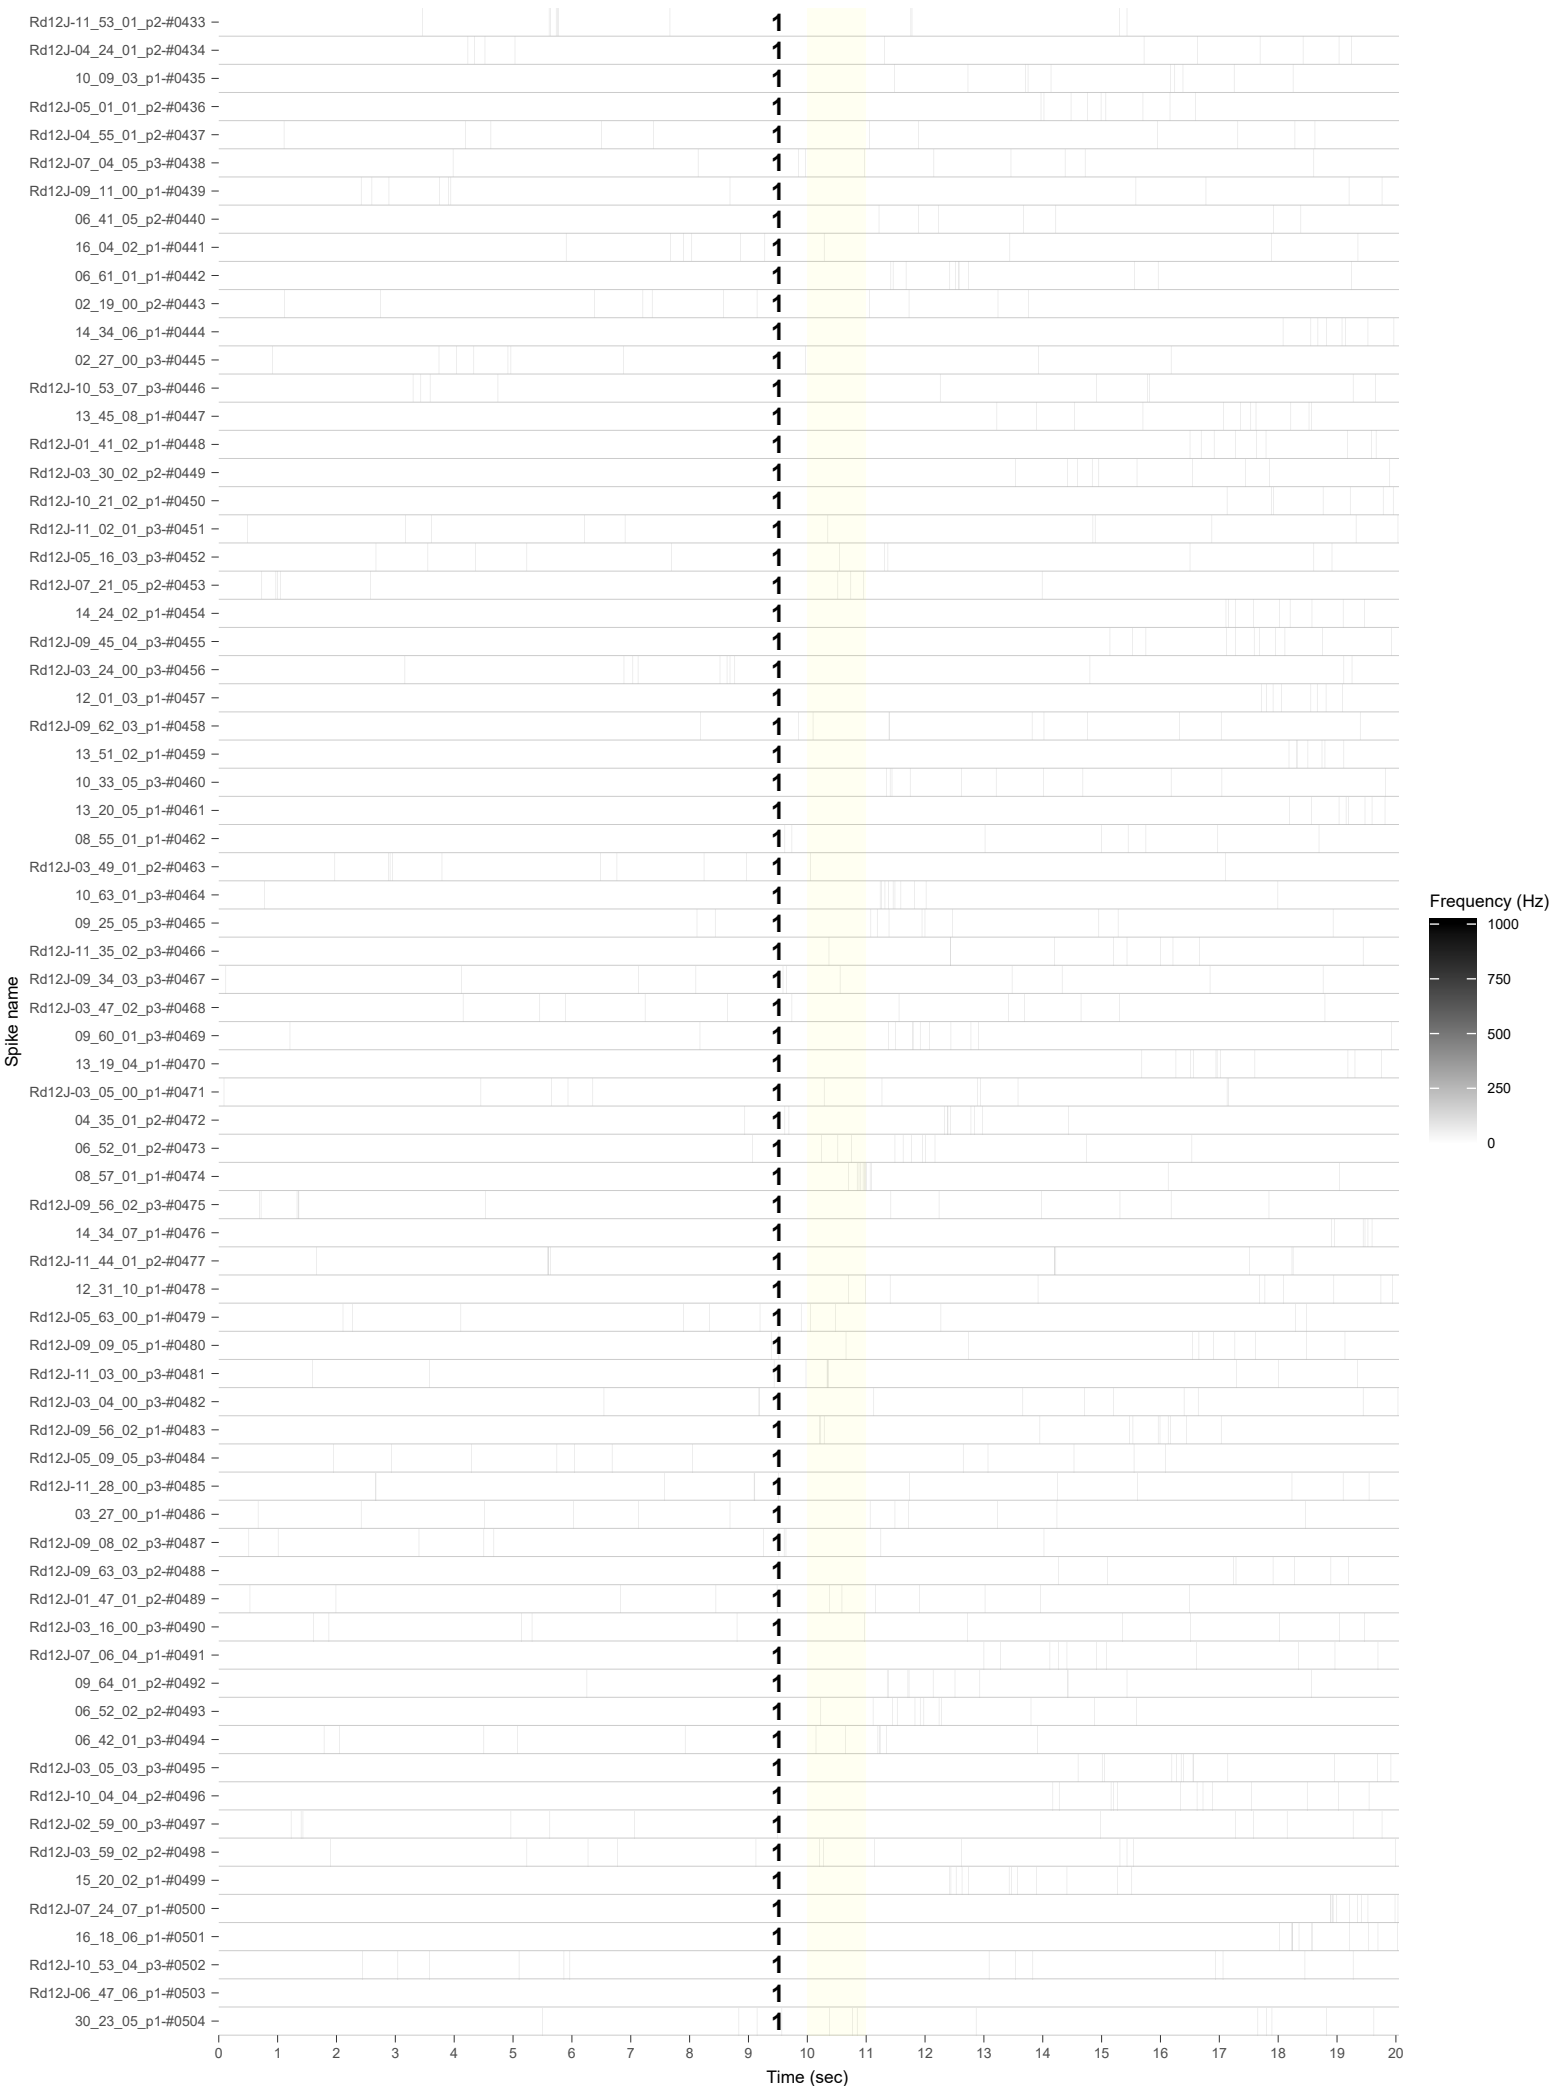

# Teaching dataset: Automatic clustering + Mandai modification (20160623125739) (page 8/54)

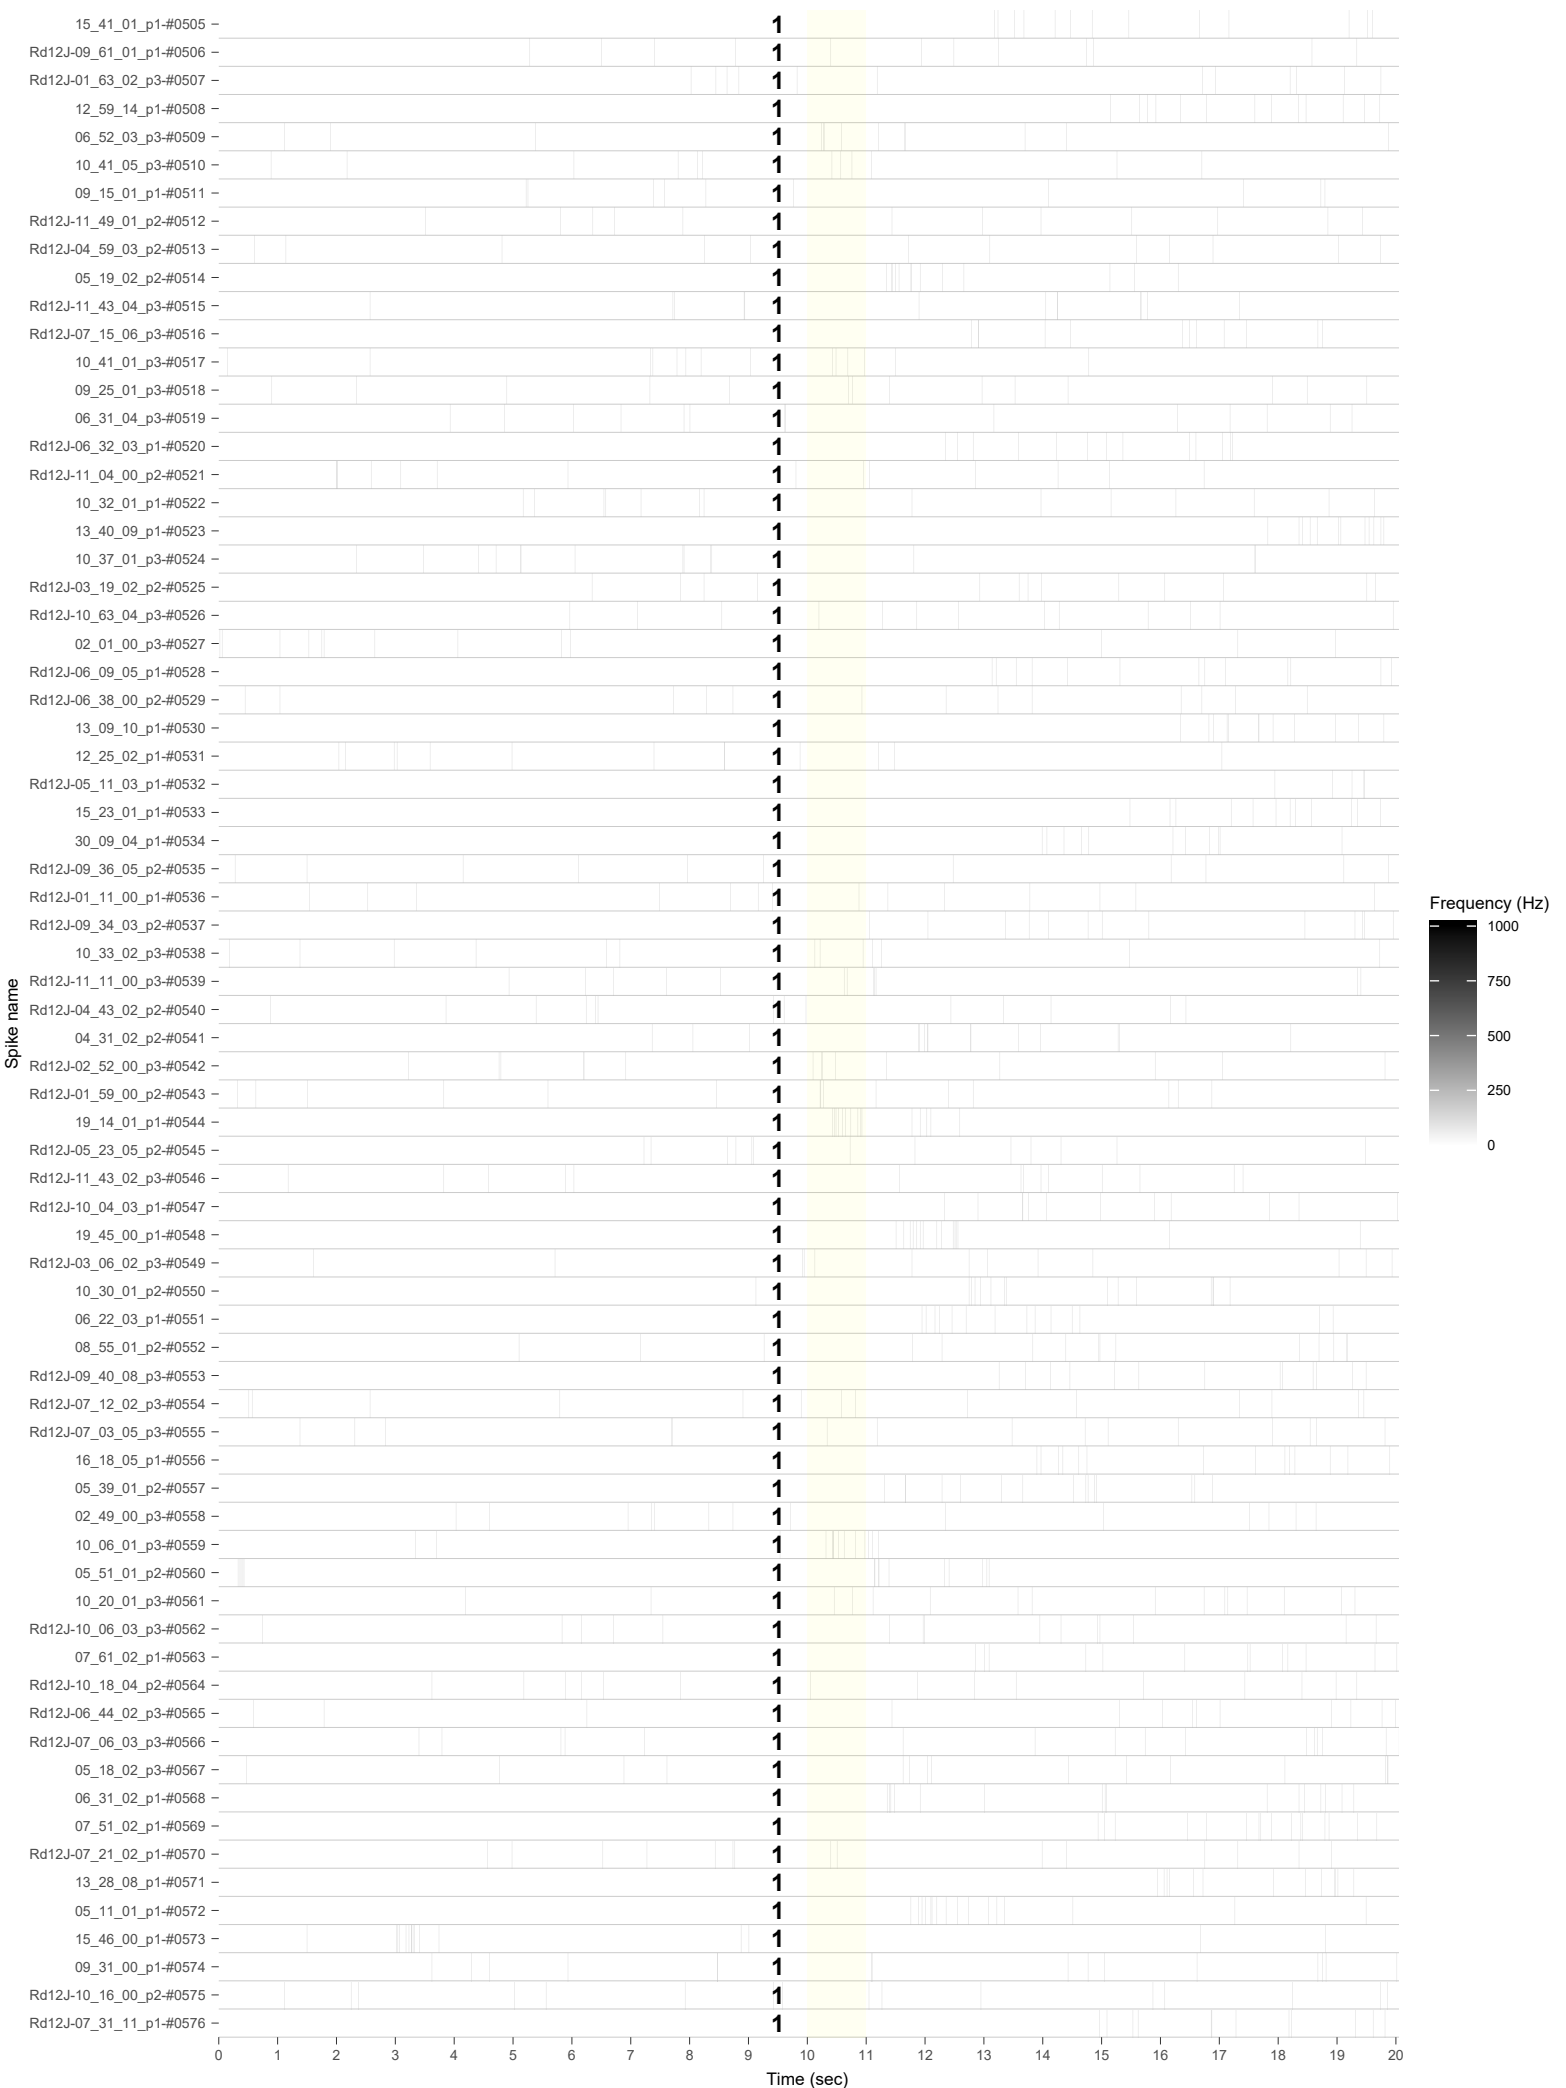



# Teaching dataset: Automatic clustering + Mandai modification (20160623125739) (page 9/54)

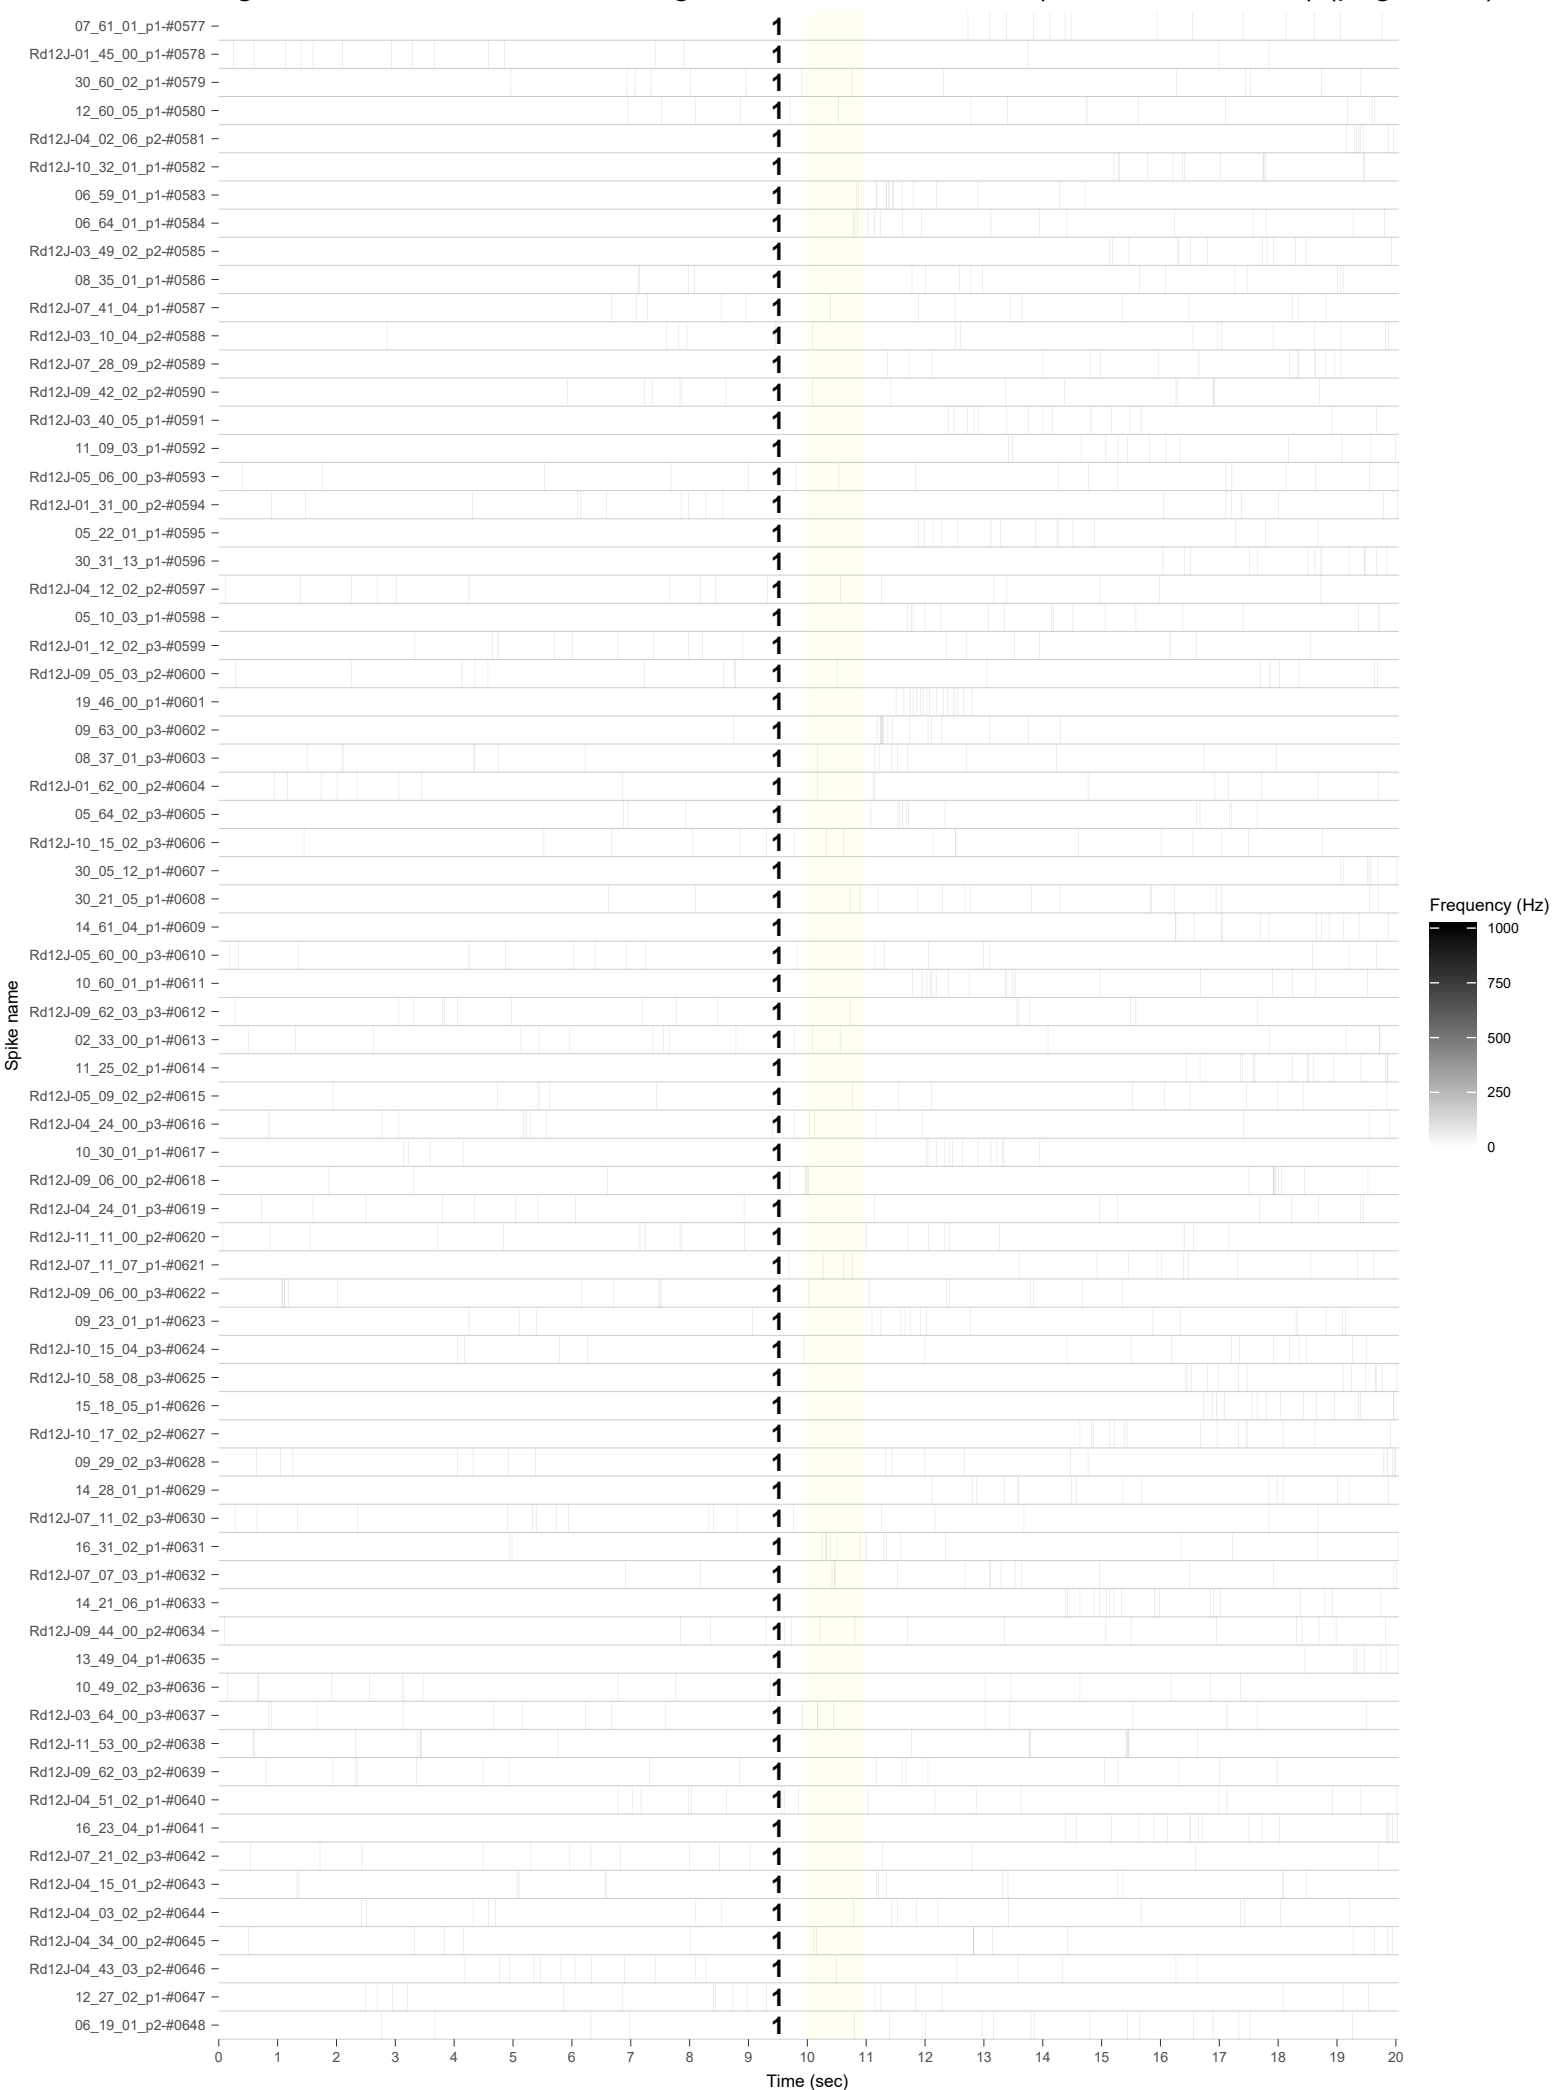

# Teaching dataset: Automatic clustering + Mandai modification (20160623125739) (page 10/54)

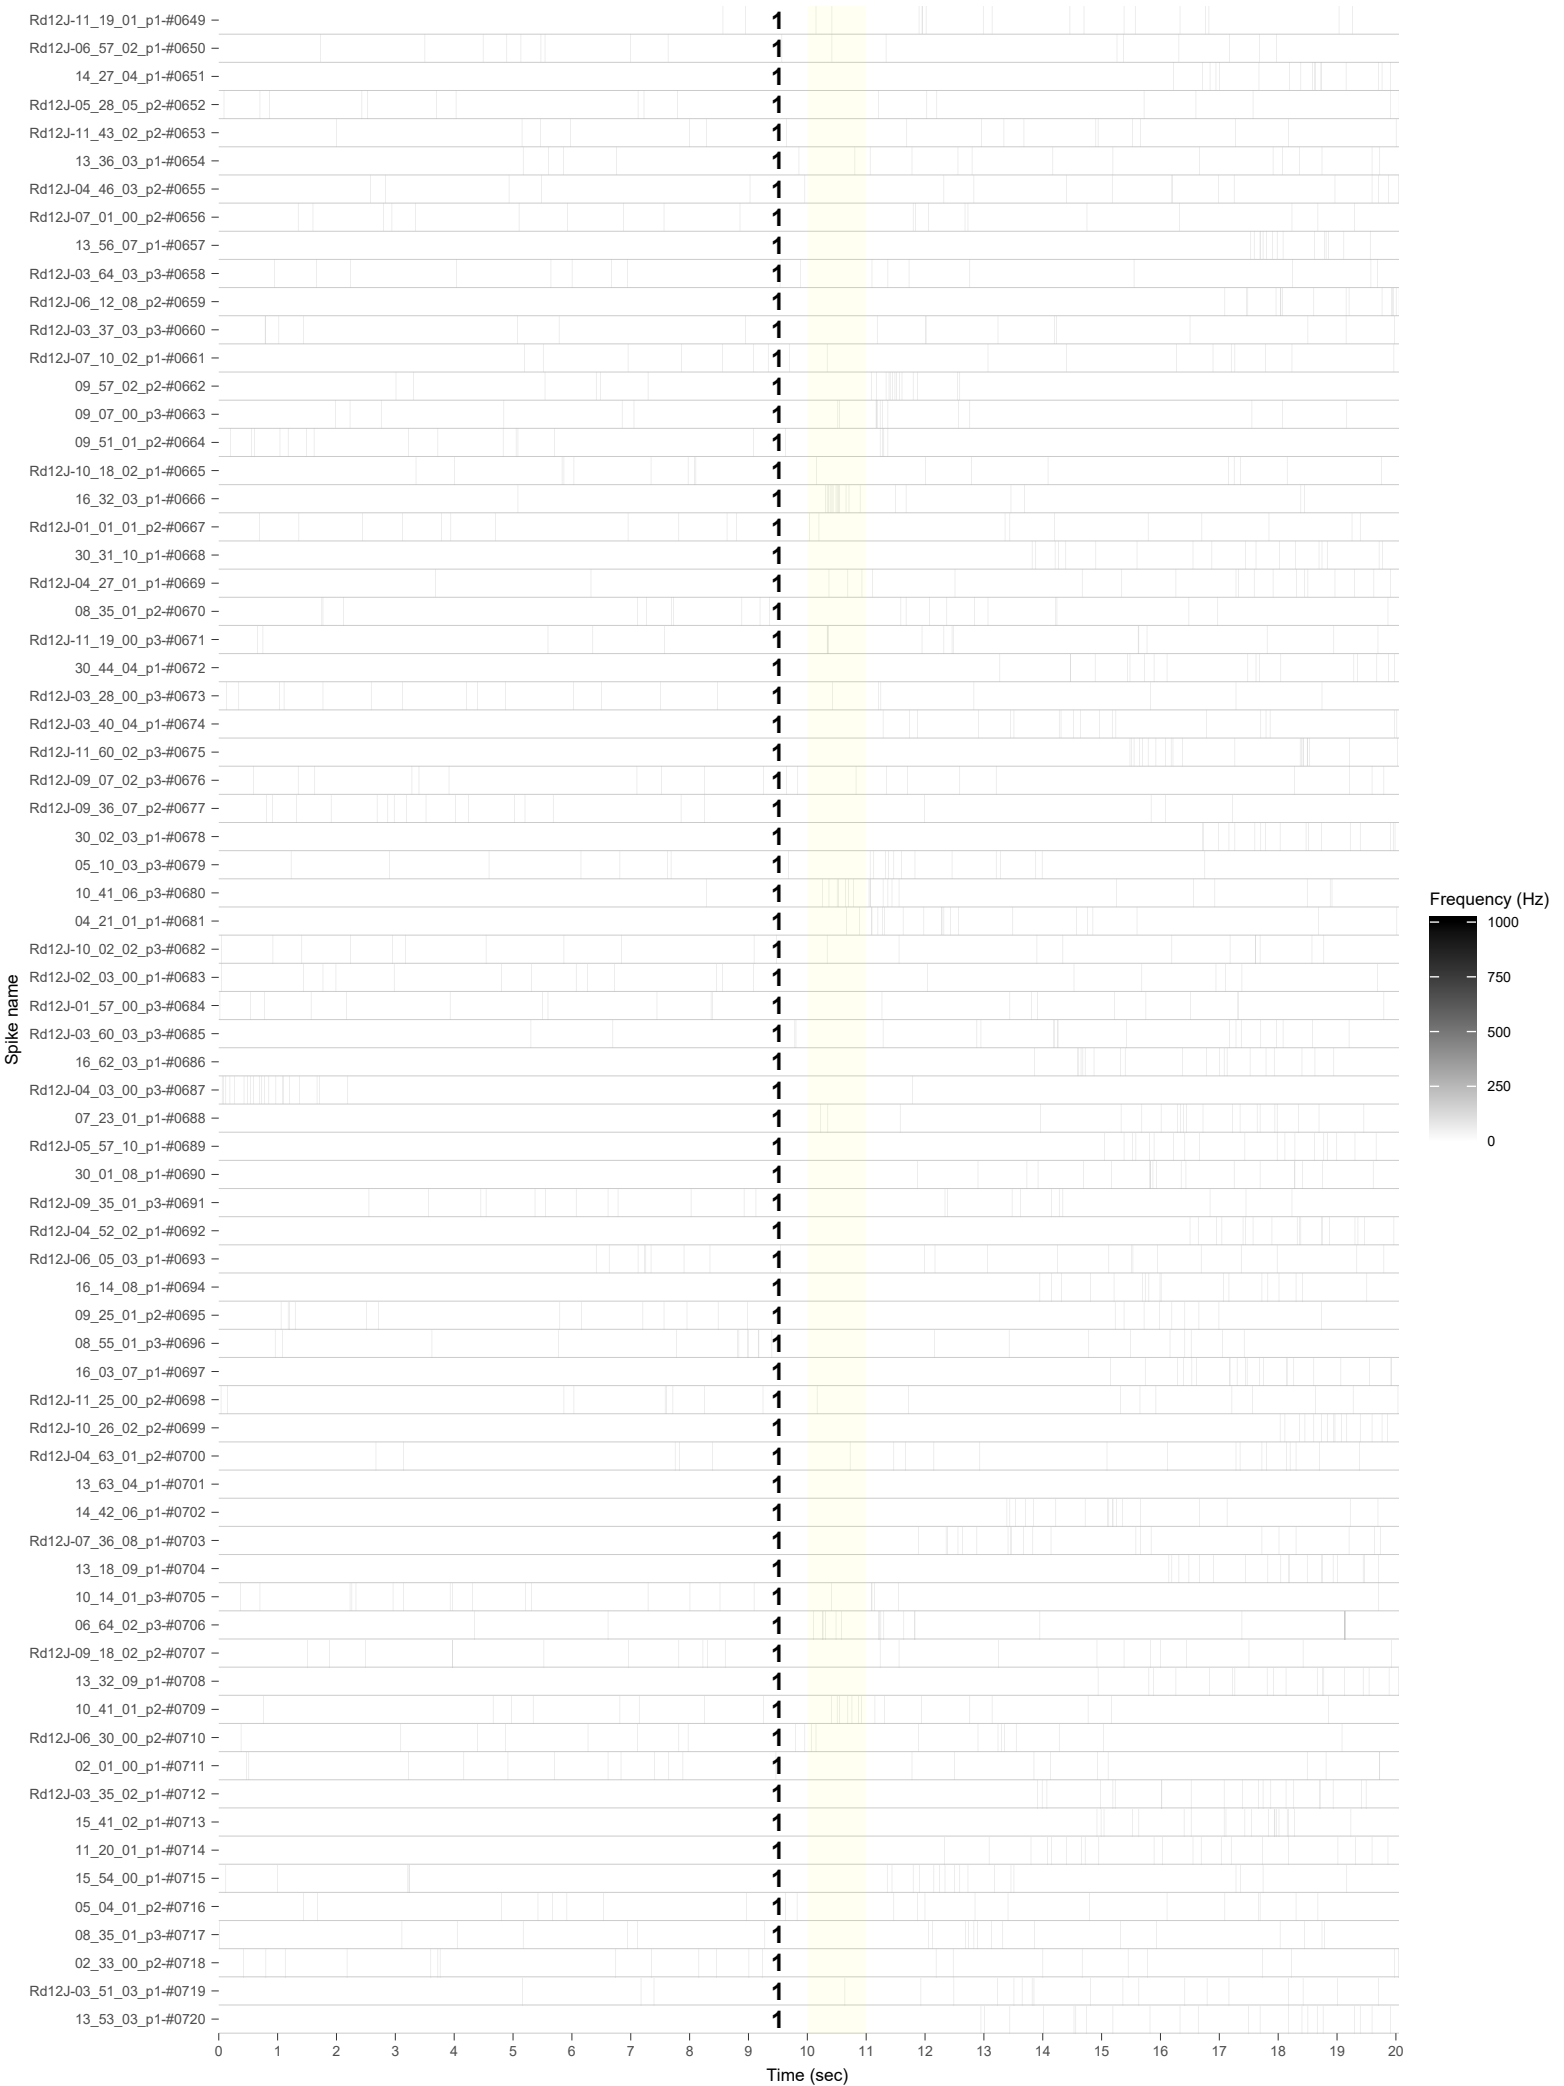

# Teaching dataset: Automatic clustering + Mandai modification (20160623125739) (page 11/54)

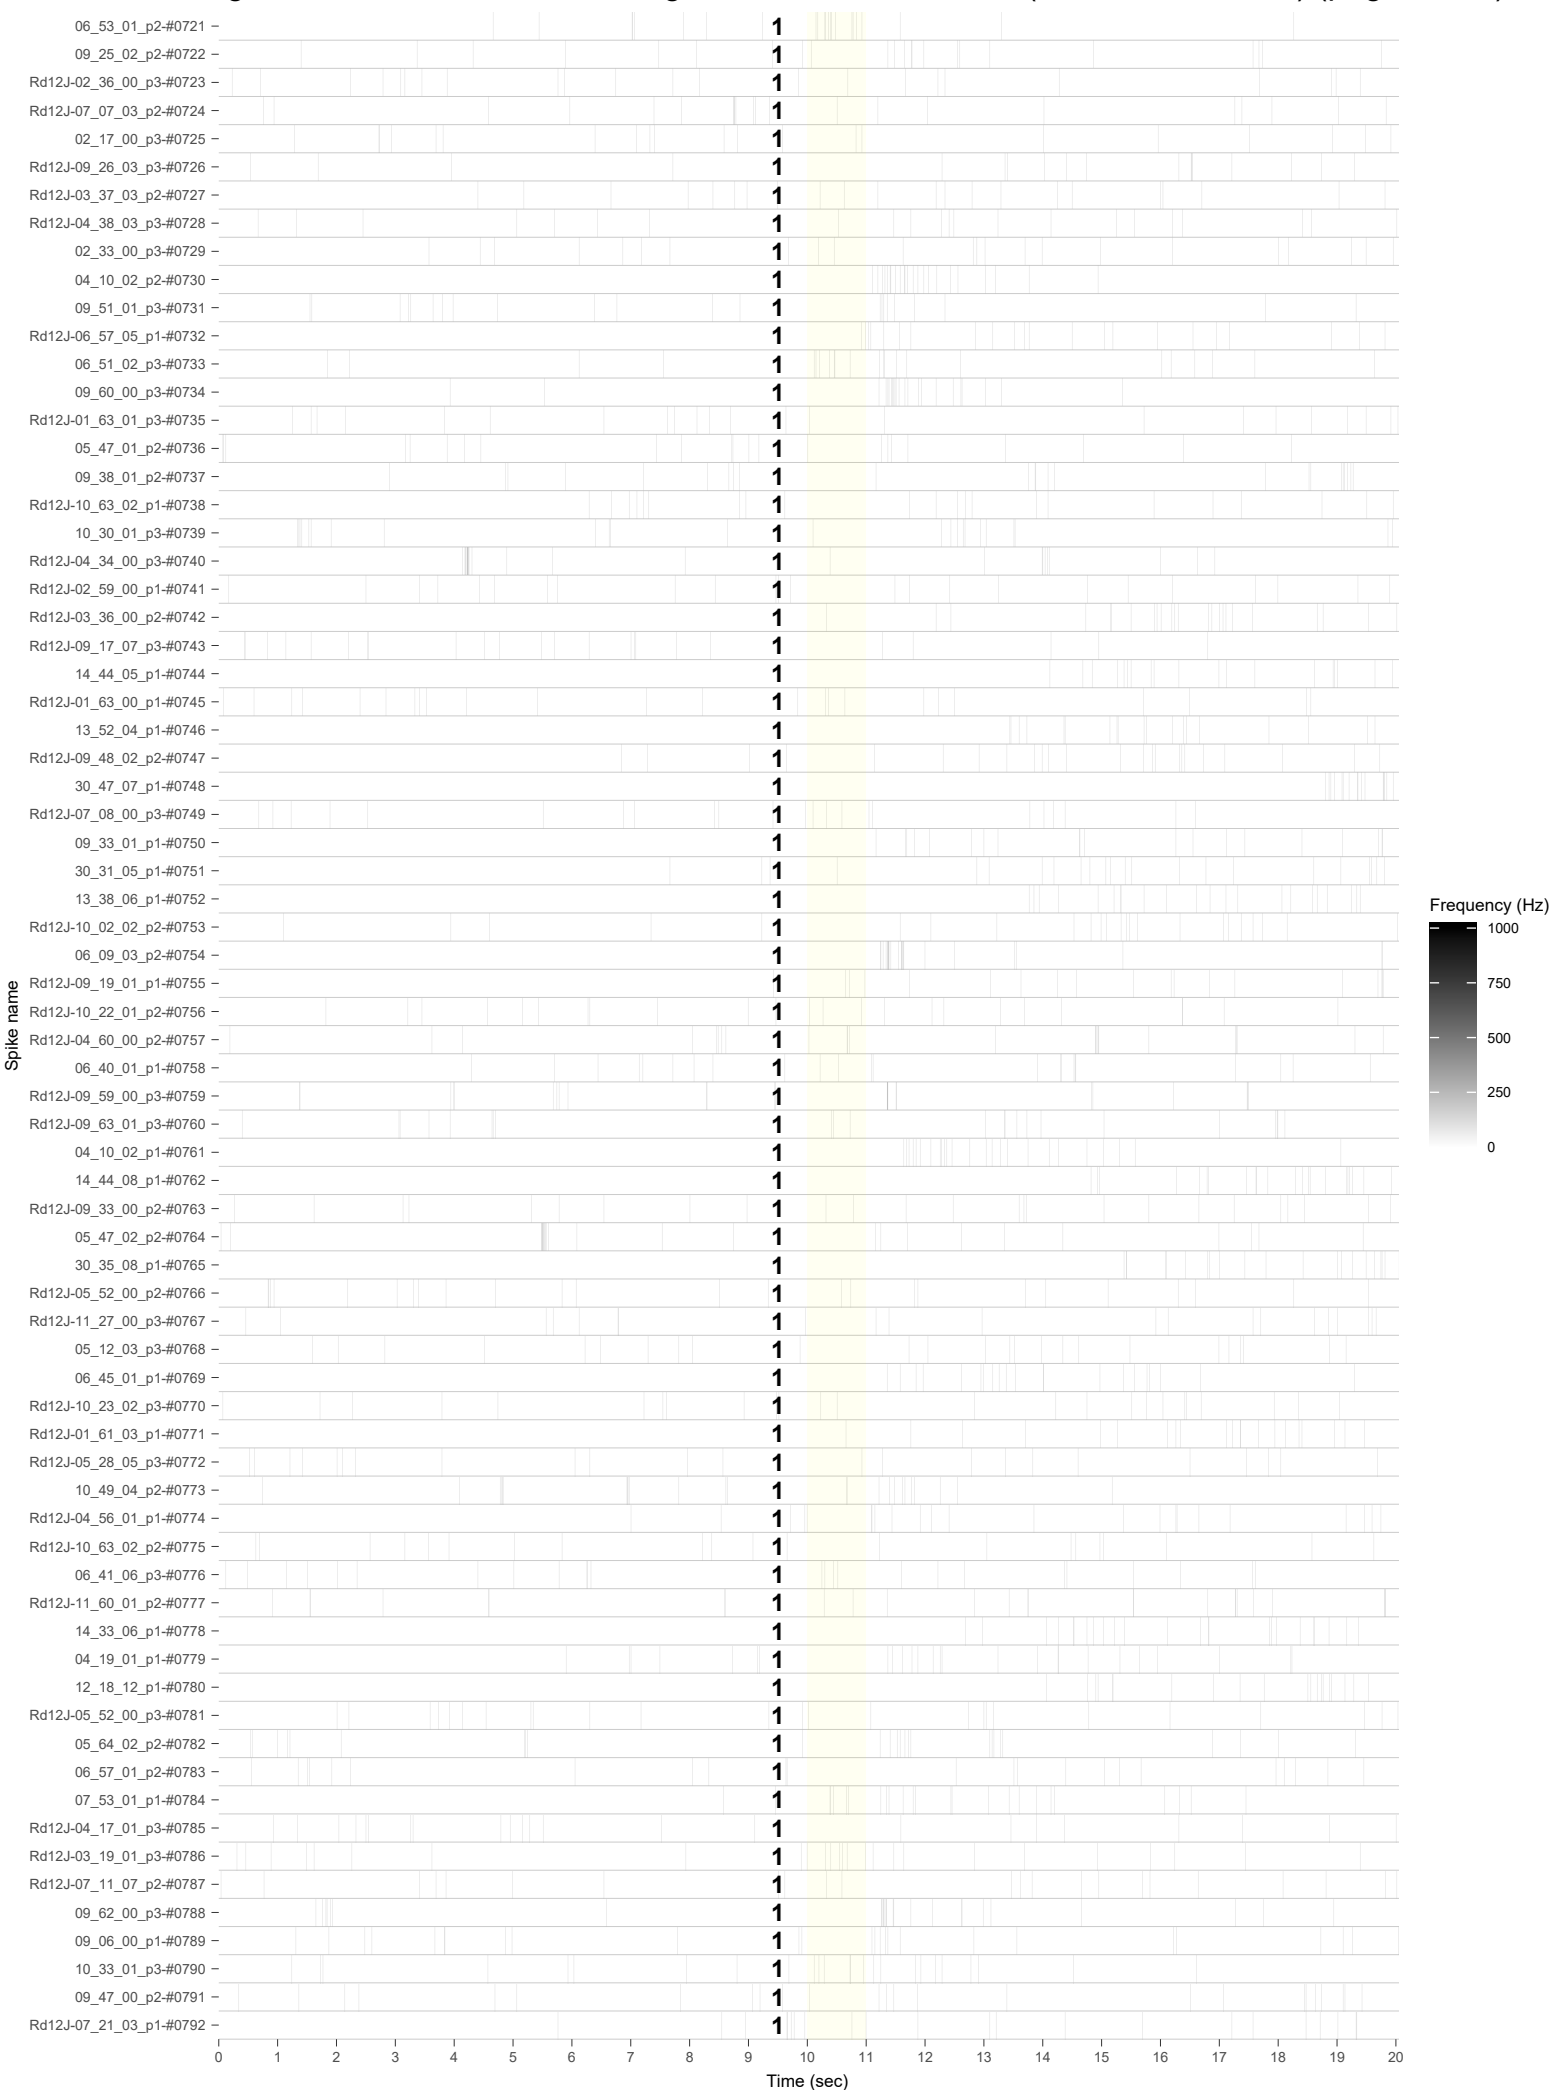

# Teaching dataset: Automatic clustering + Mandai modification (20160623125739) (page 12/54)

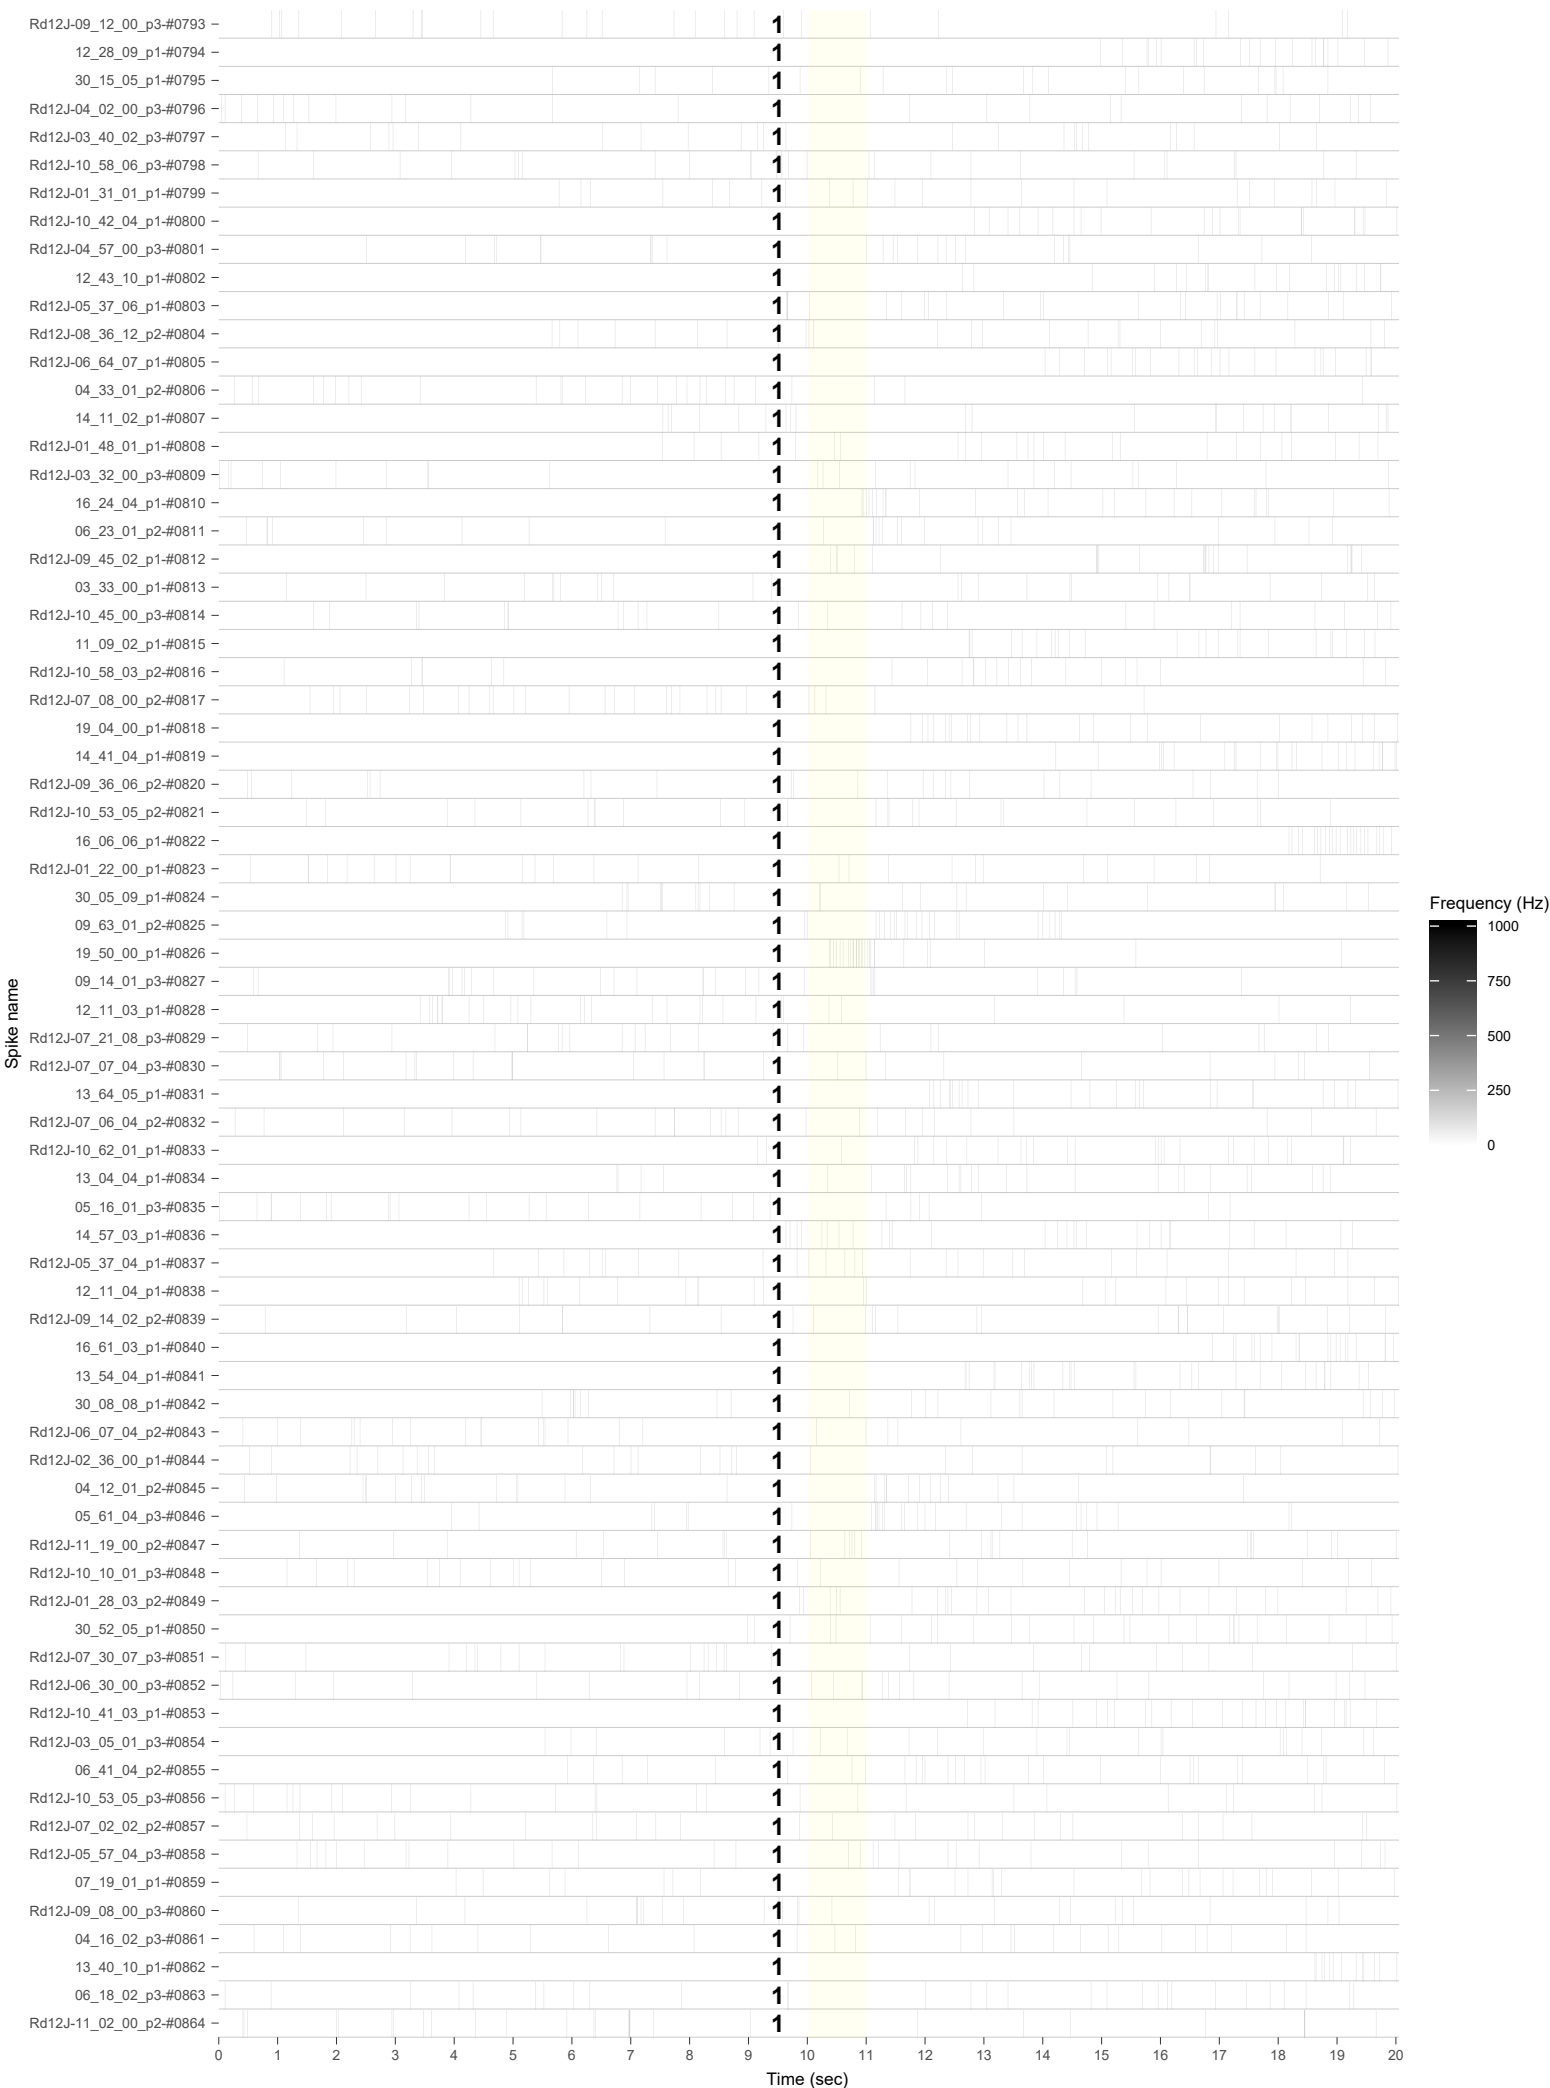

# Teaching dataset: Automatic clustering + Mandai modification (20160623125739) (page 13/54)

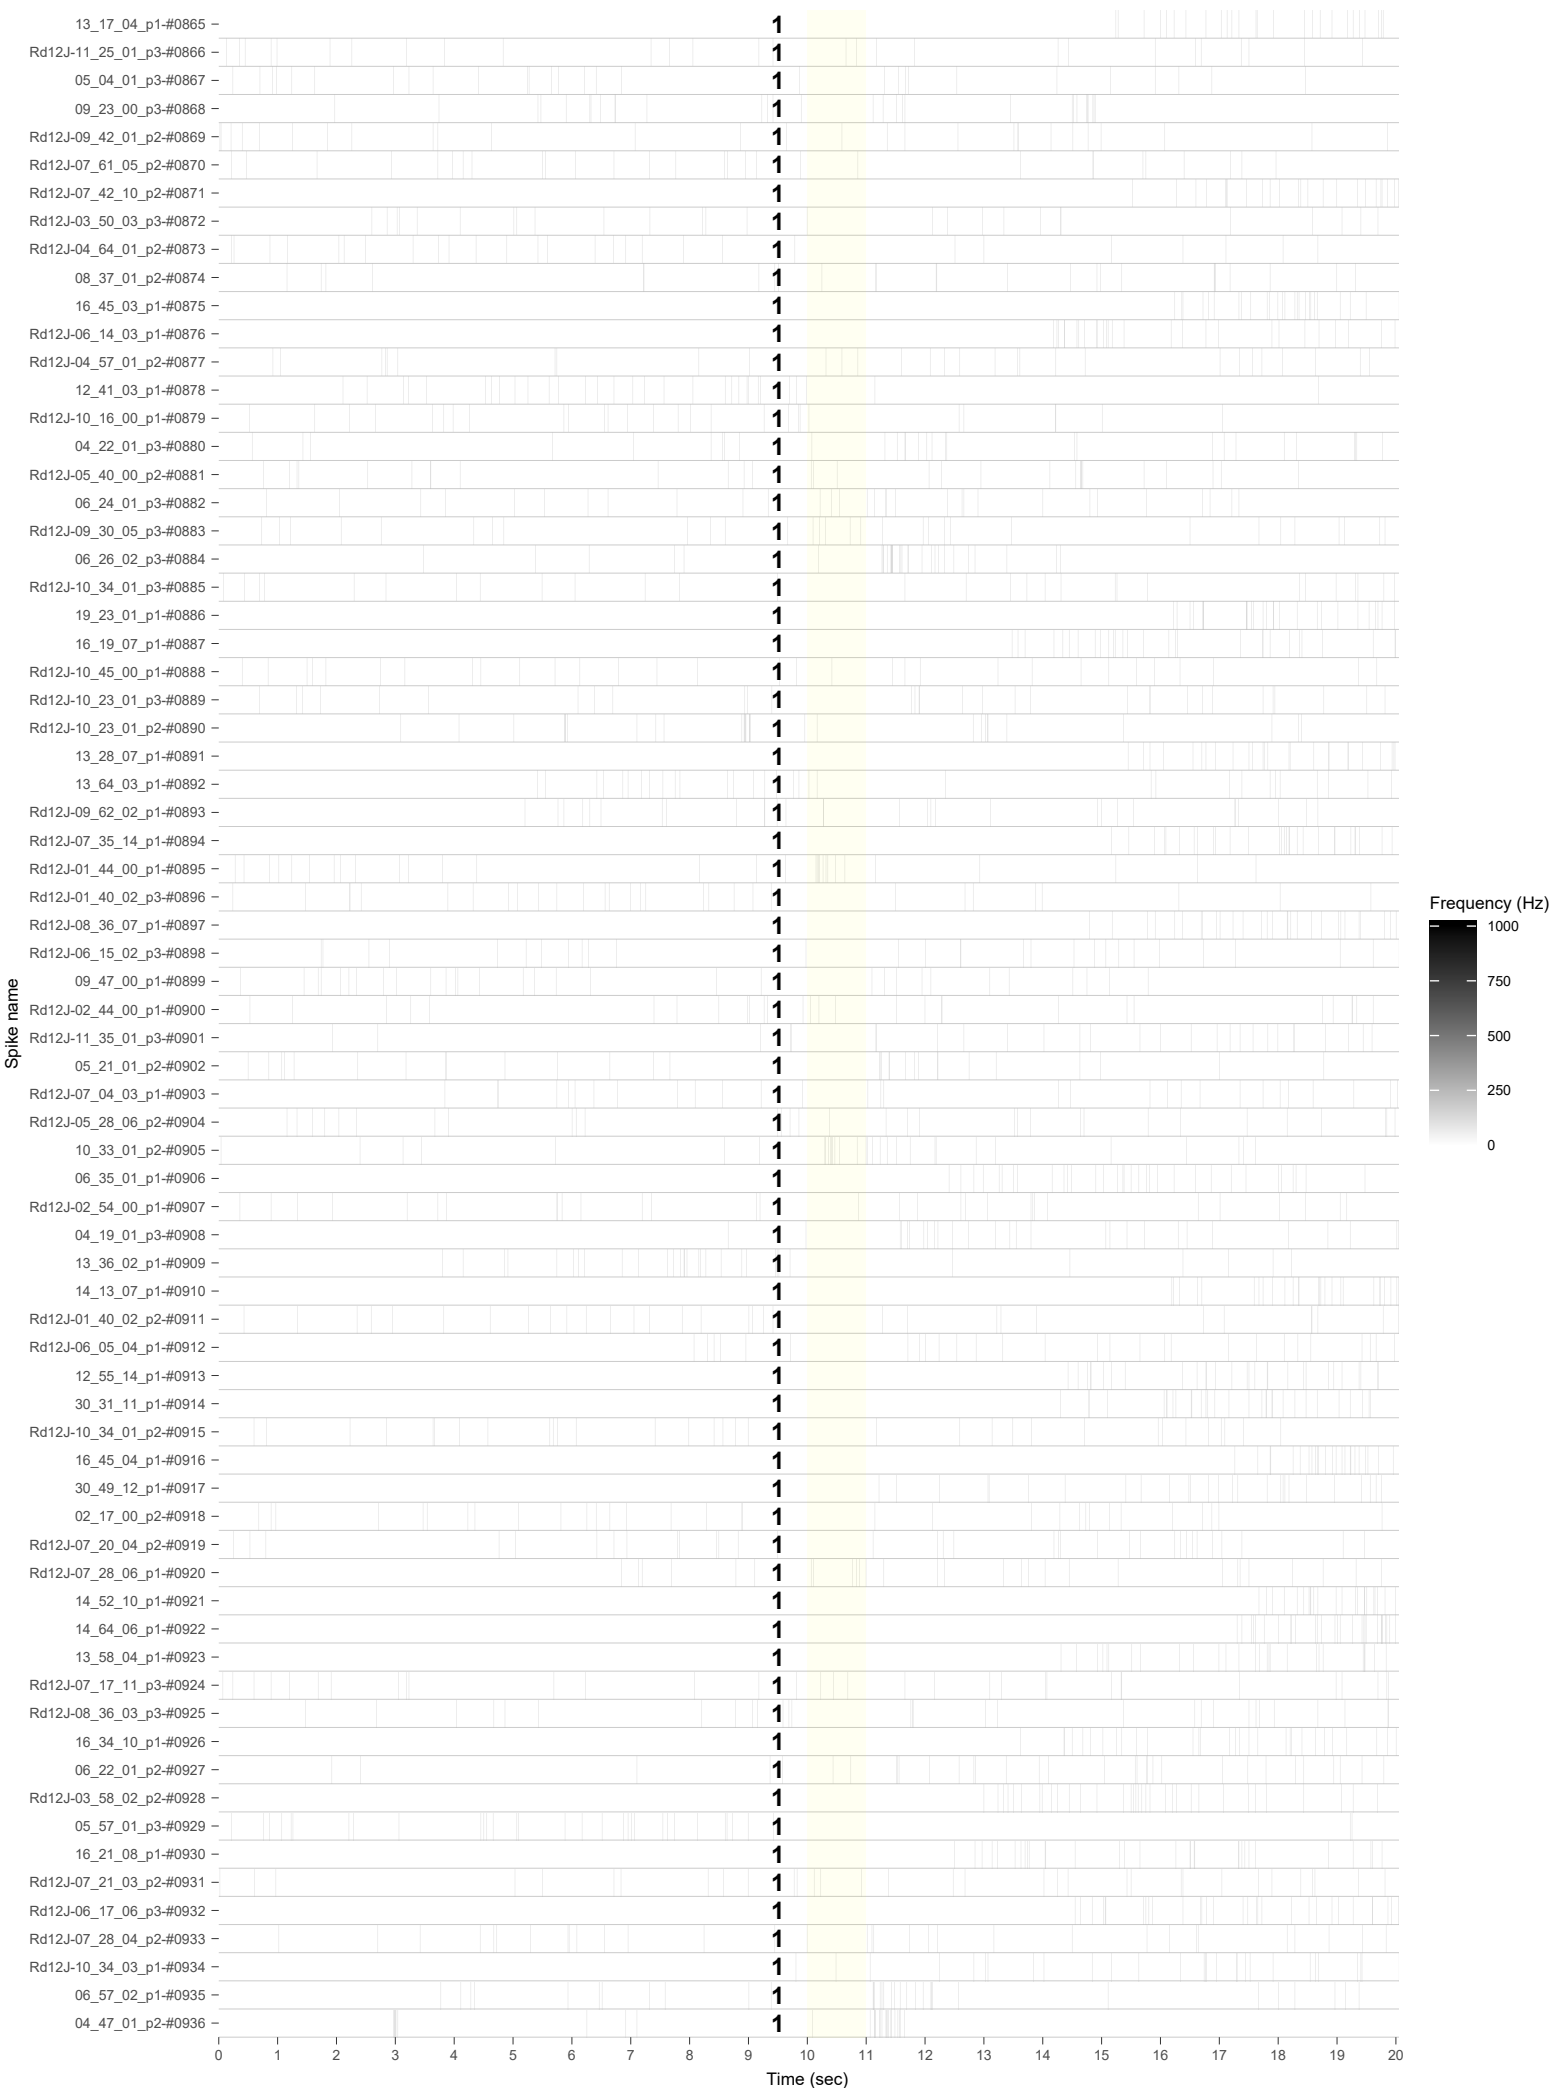

# Teaching dataset: Automatic clustering + Mandai modification (20160623125739) (page 14/54)

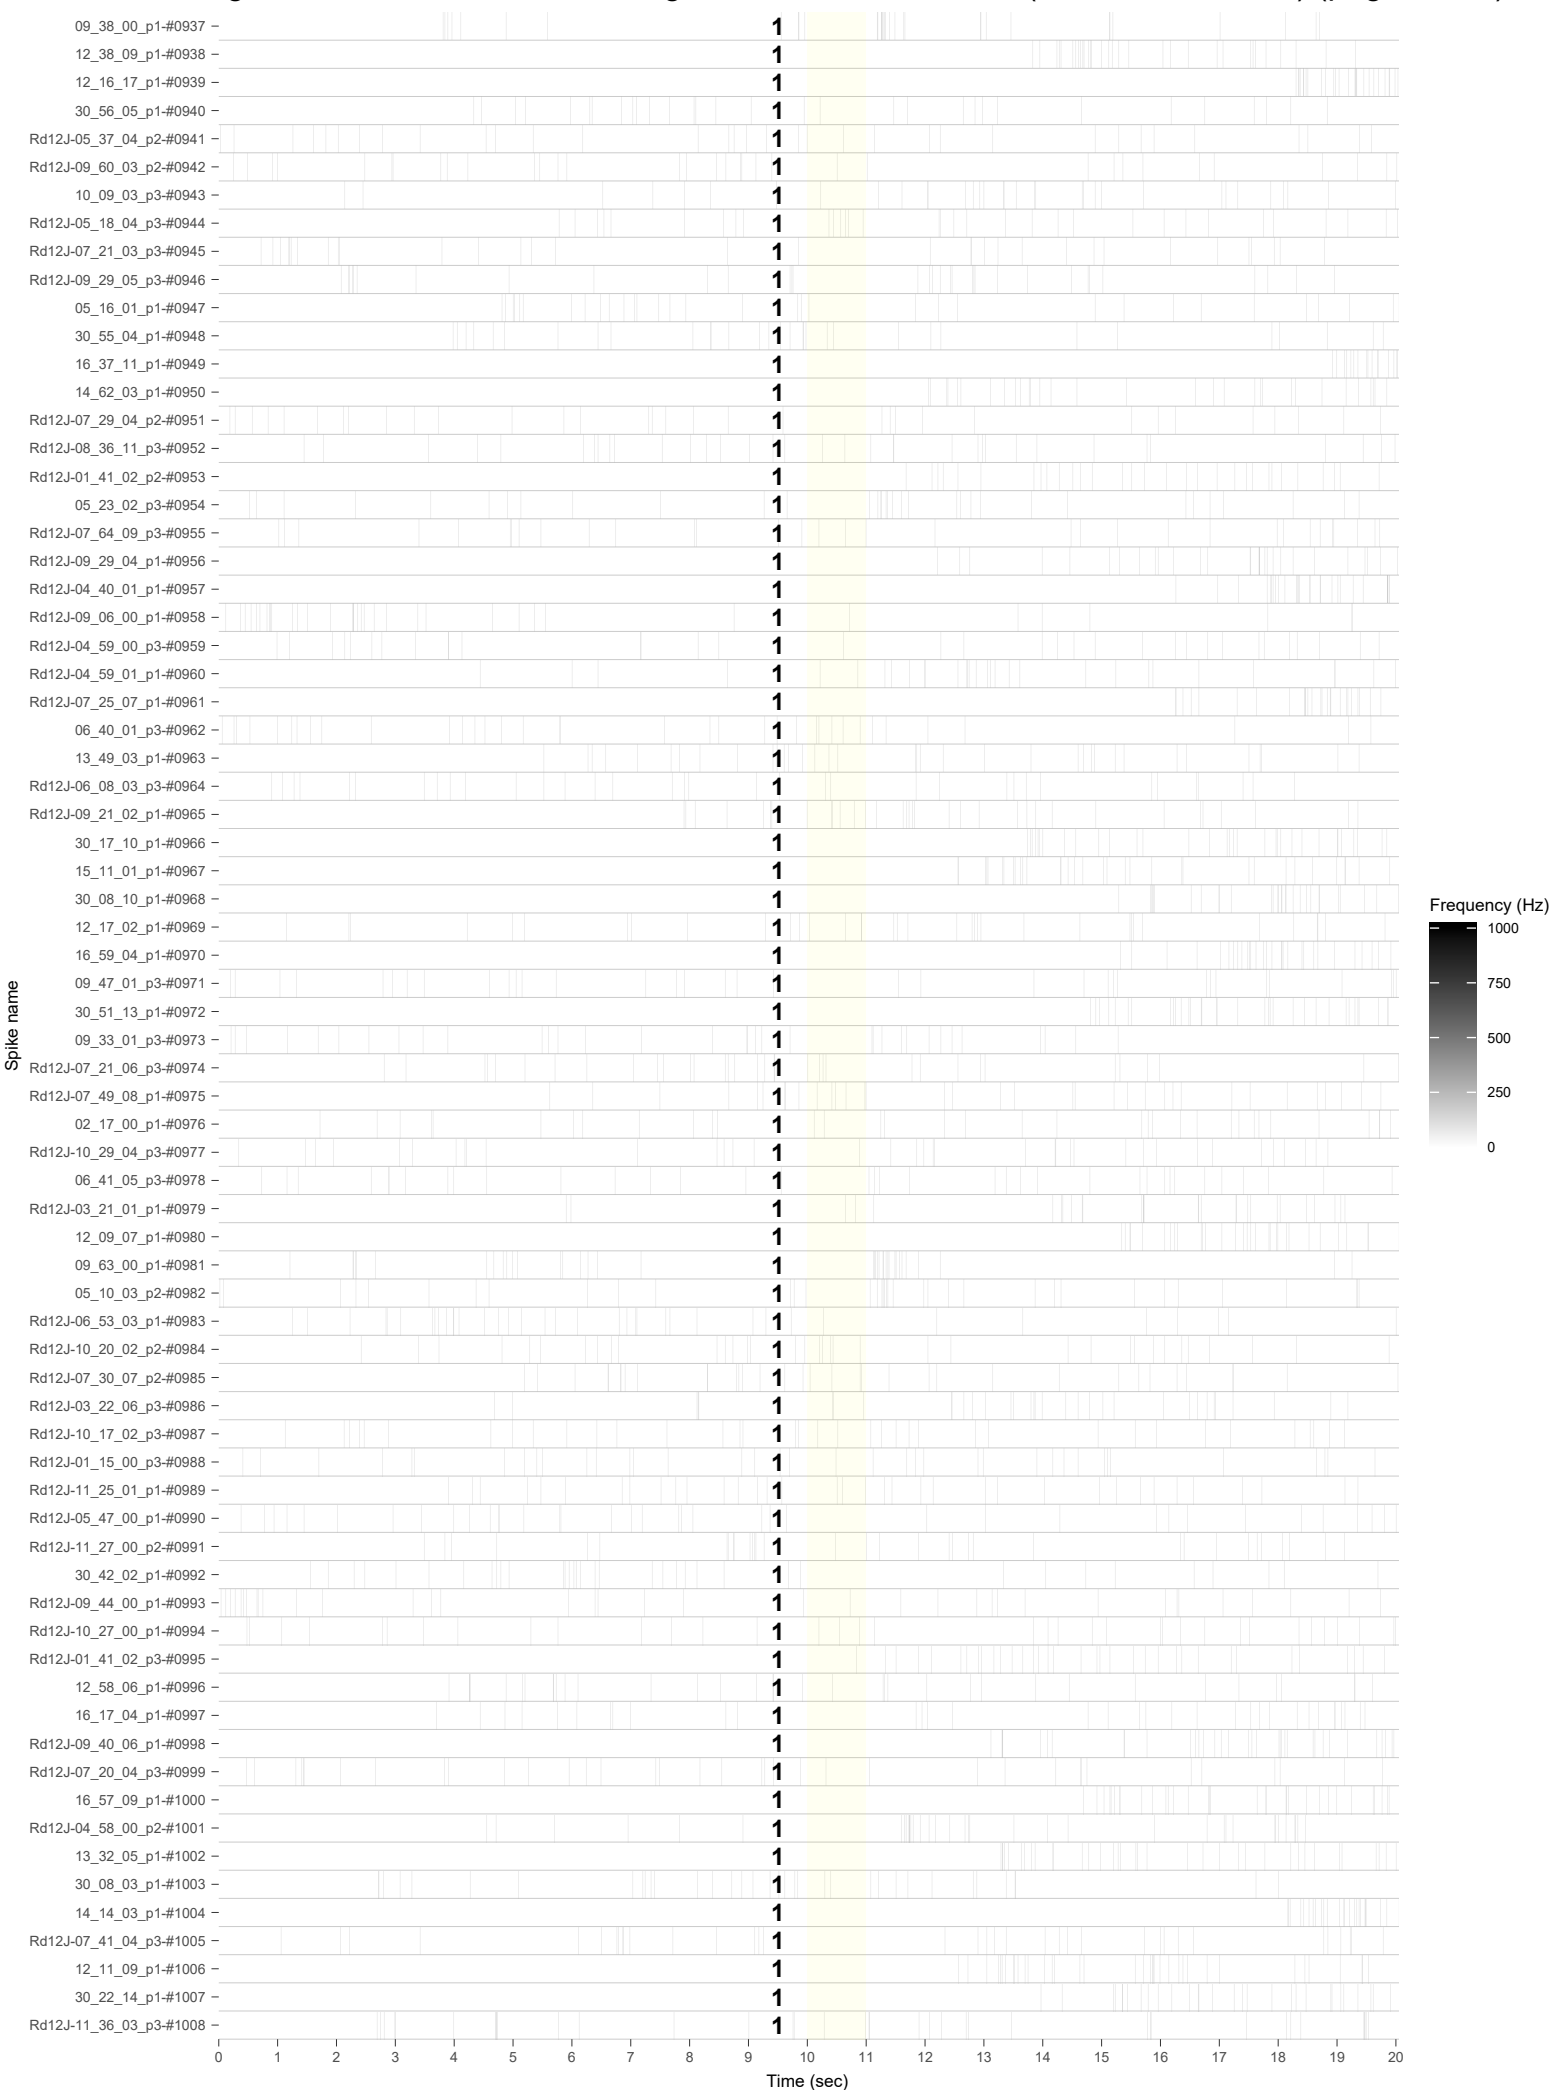

# Teaching dataset: Automatic clustering + Mandai modification (20160623125739) (page 15/54)

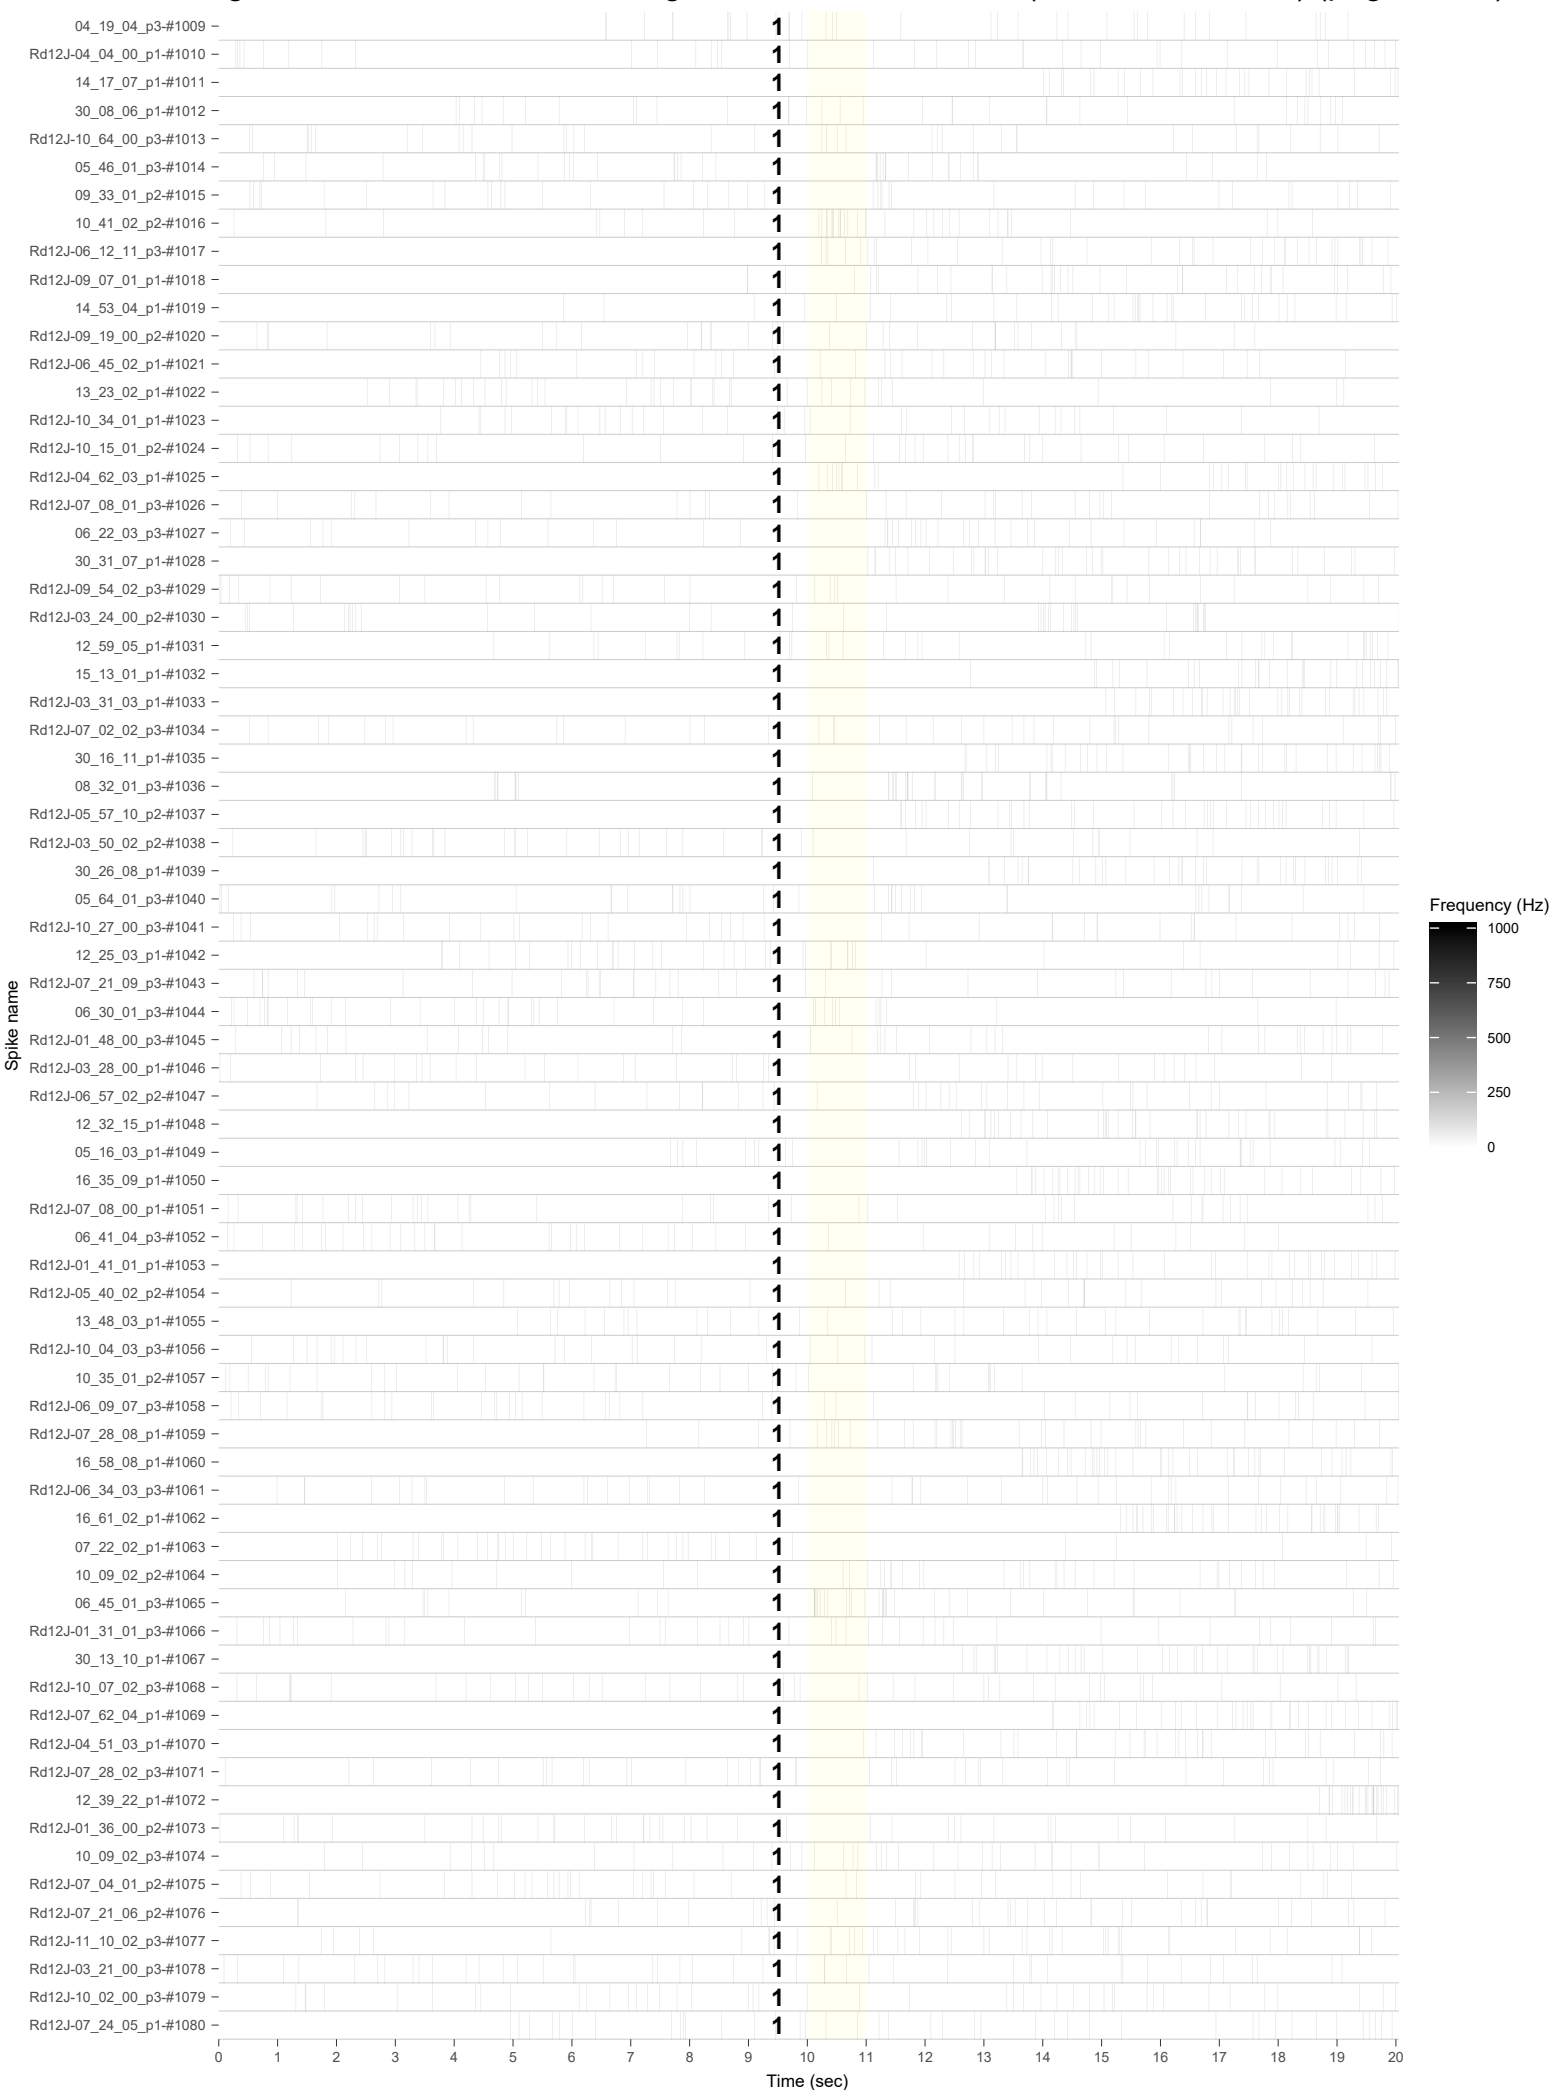

# Teaching dataset: Automatic clustering + Mandai modification (20160623125739) (page 16/54)

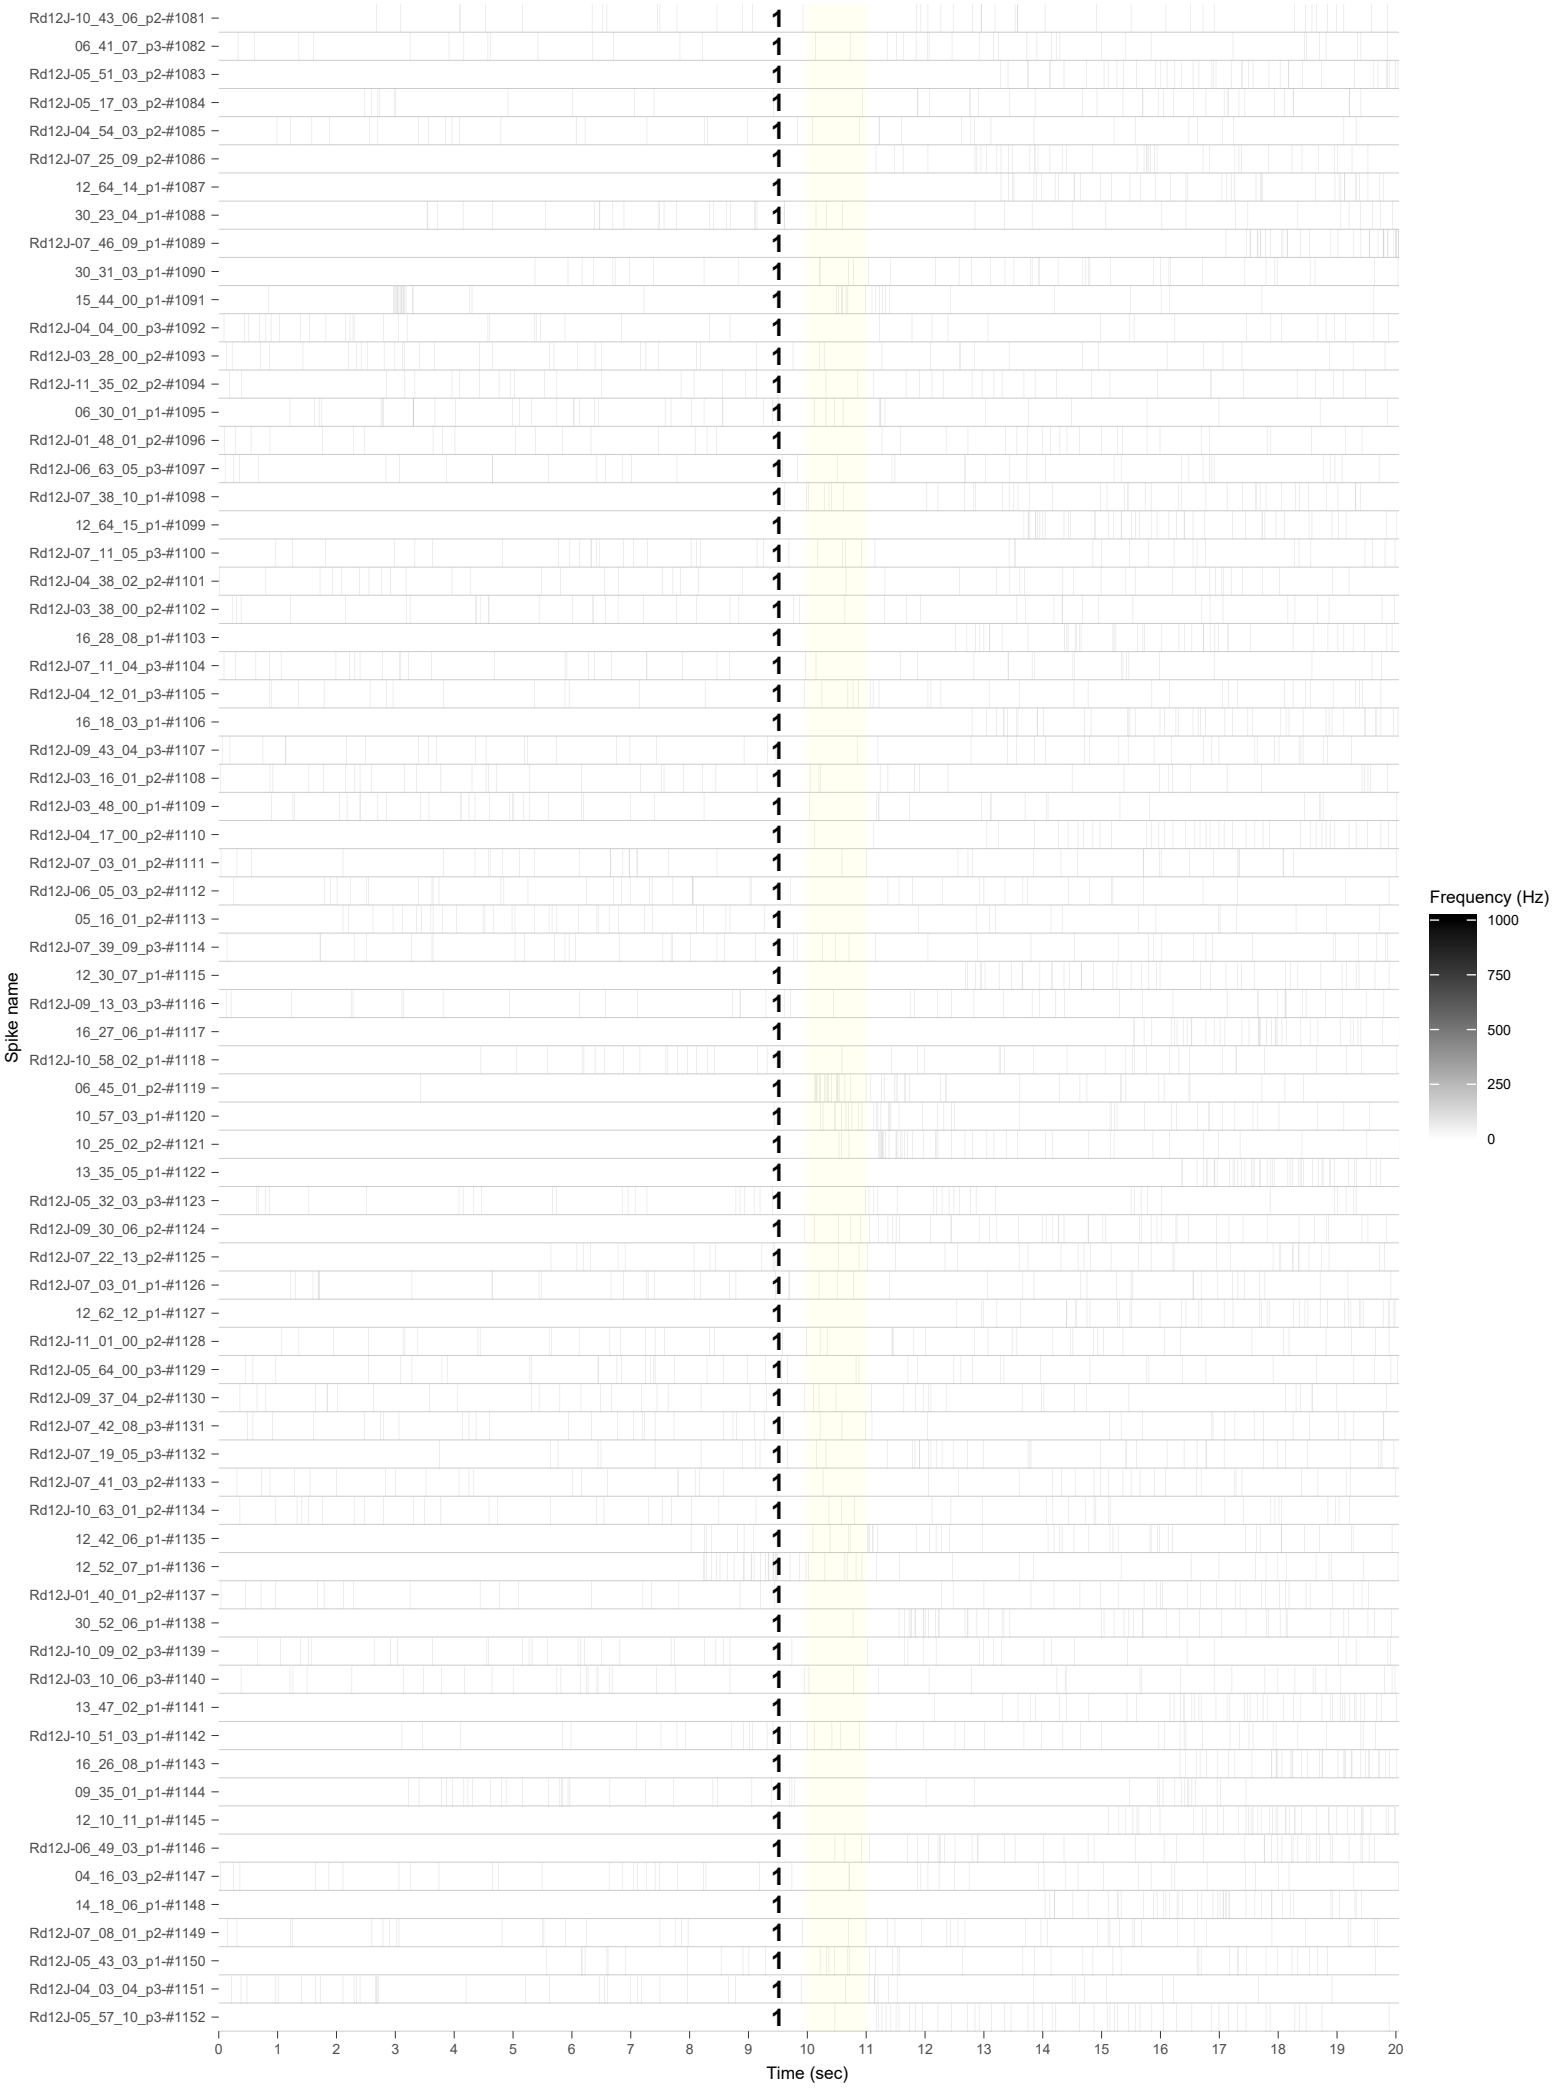



# Teaching dataset: Automatic clustering + Mandai modification (20160623125739) (page 17/54)

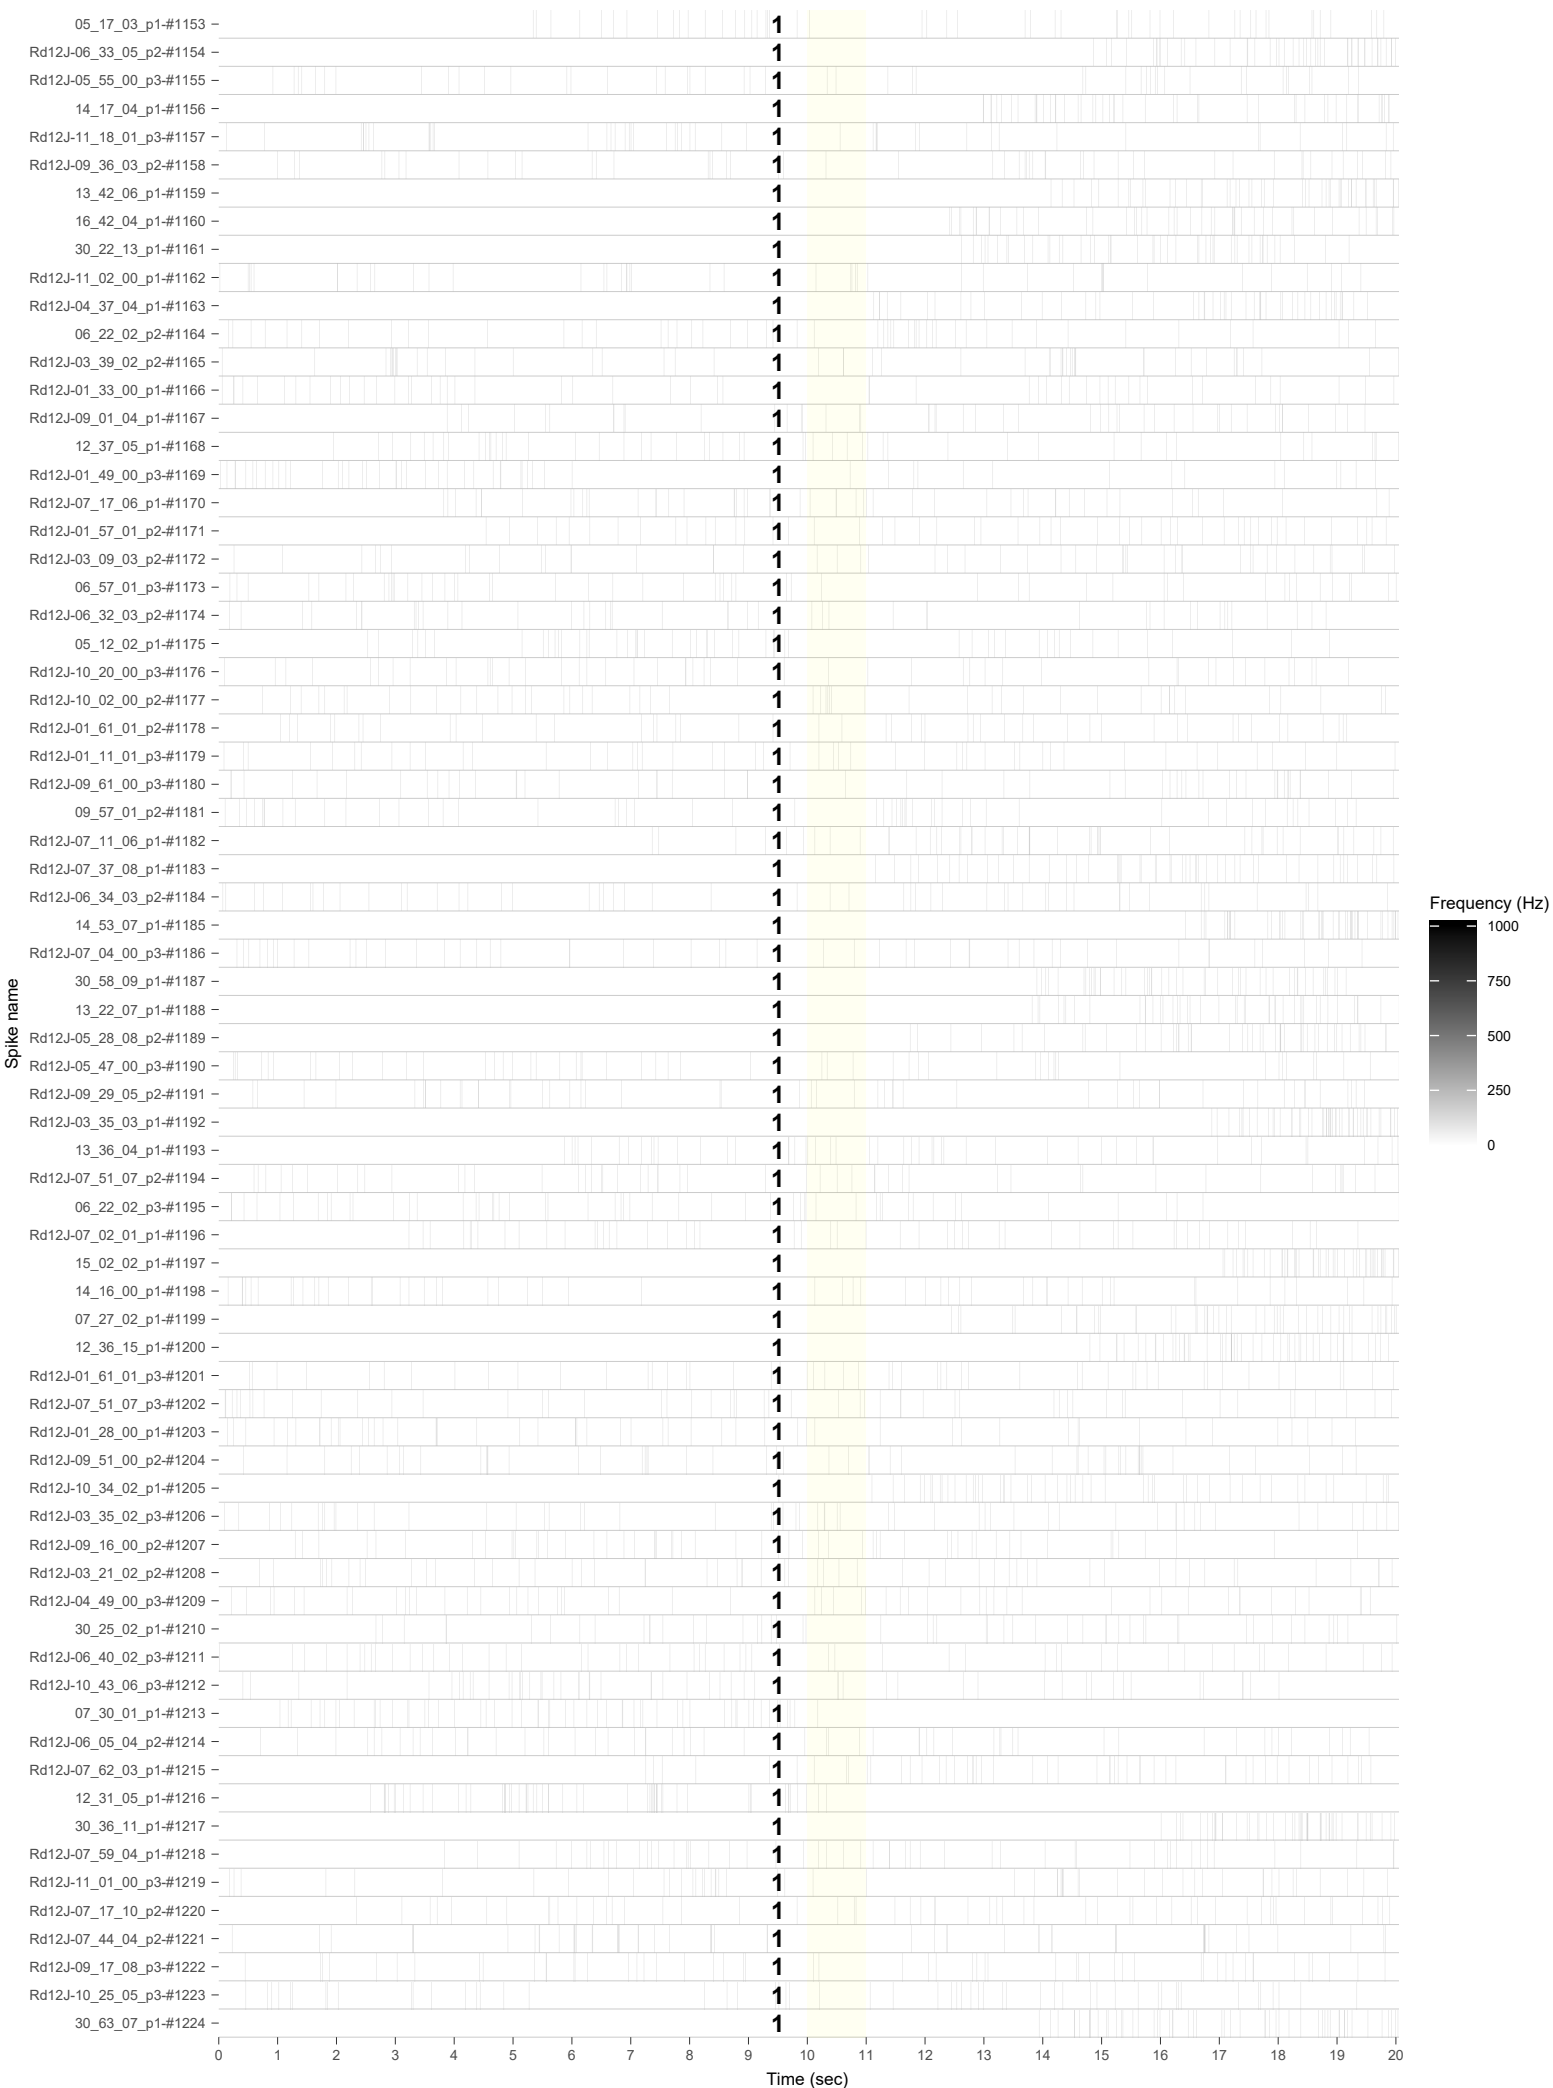

# Teaching dataset: Automatic clustering + Mandai modification (20160623125739) (page 18/54)

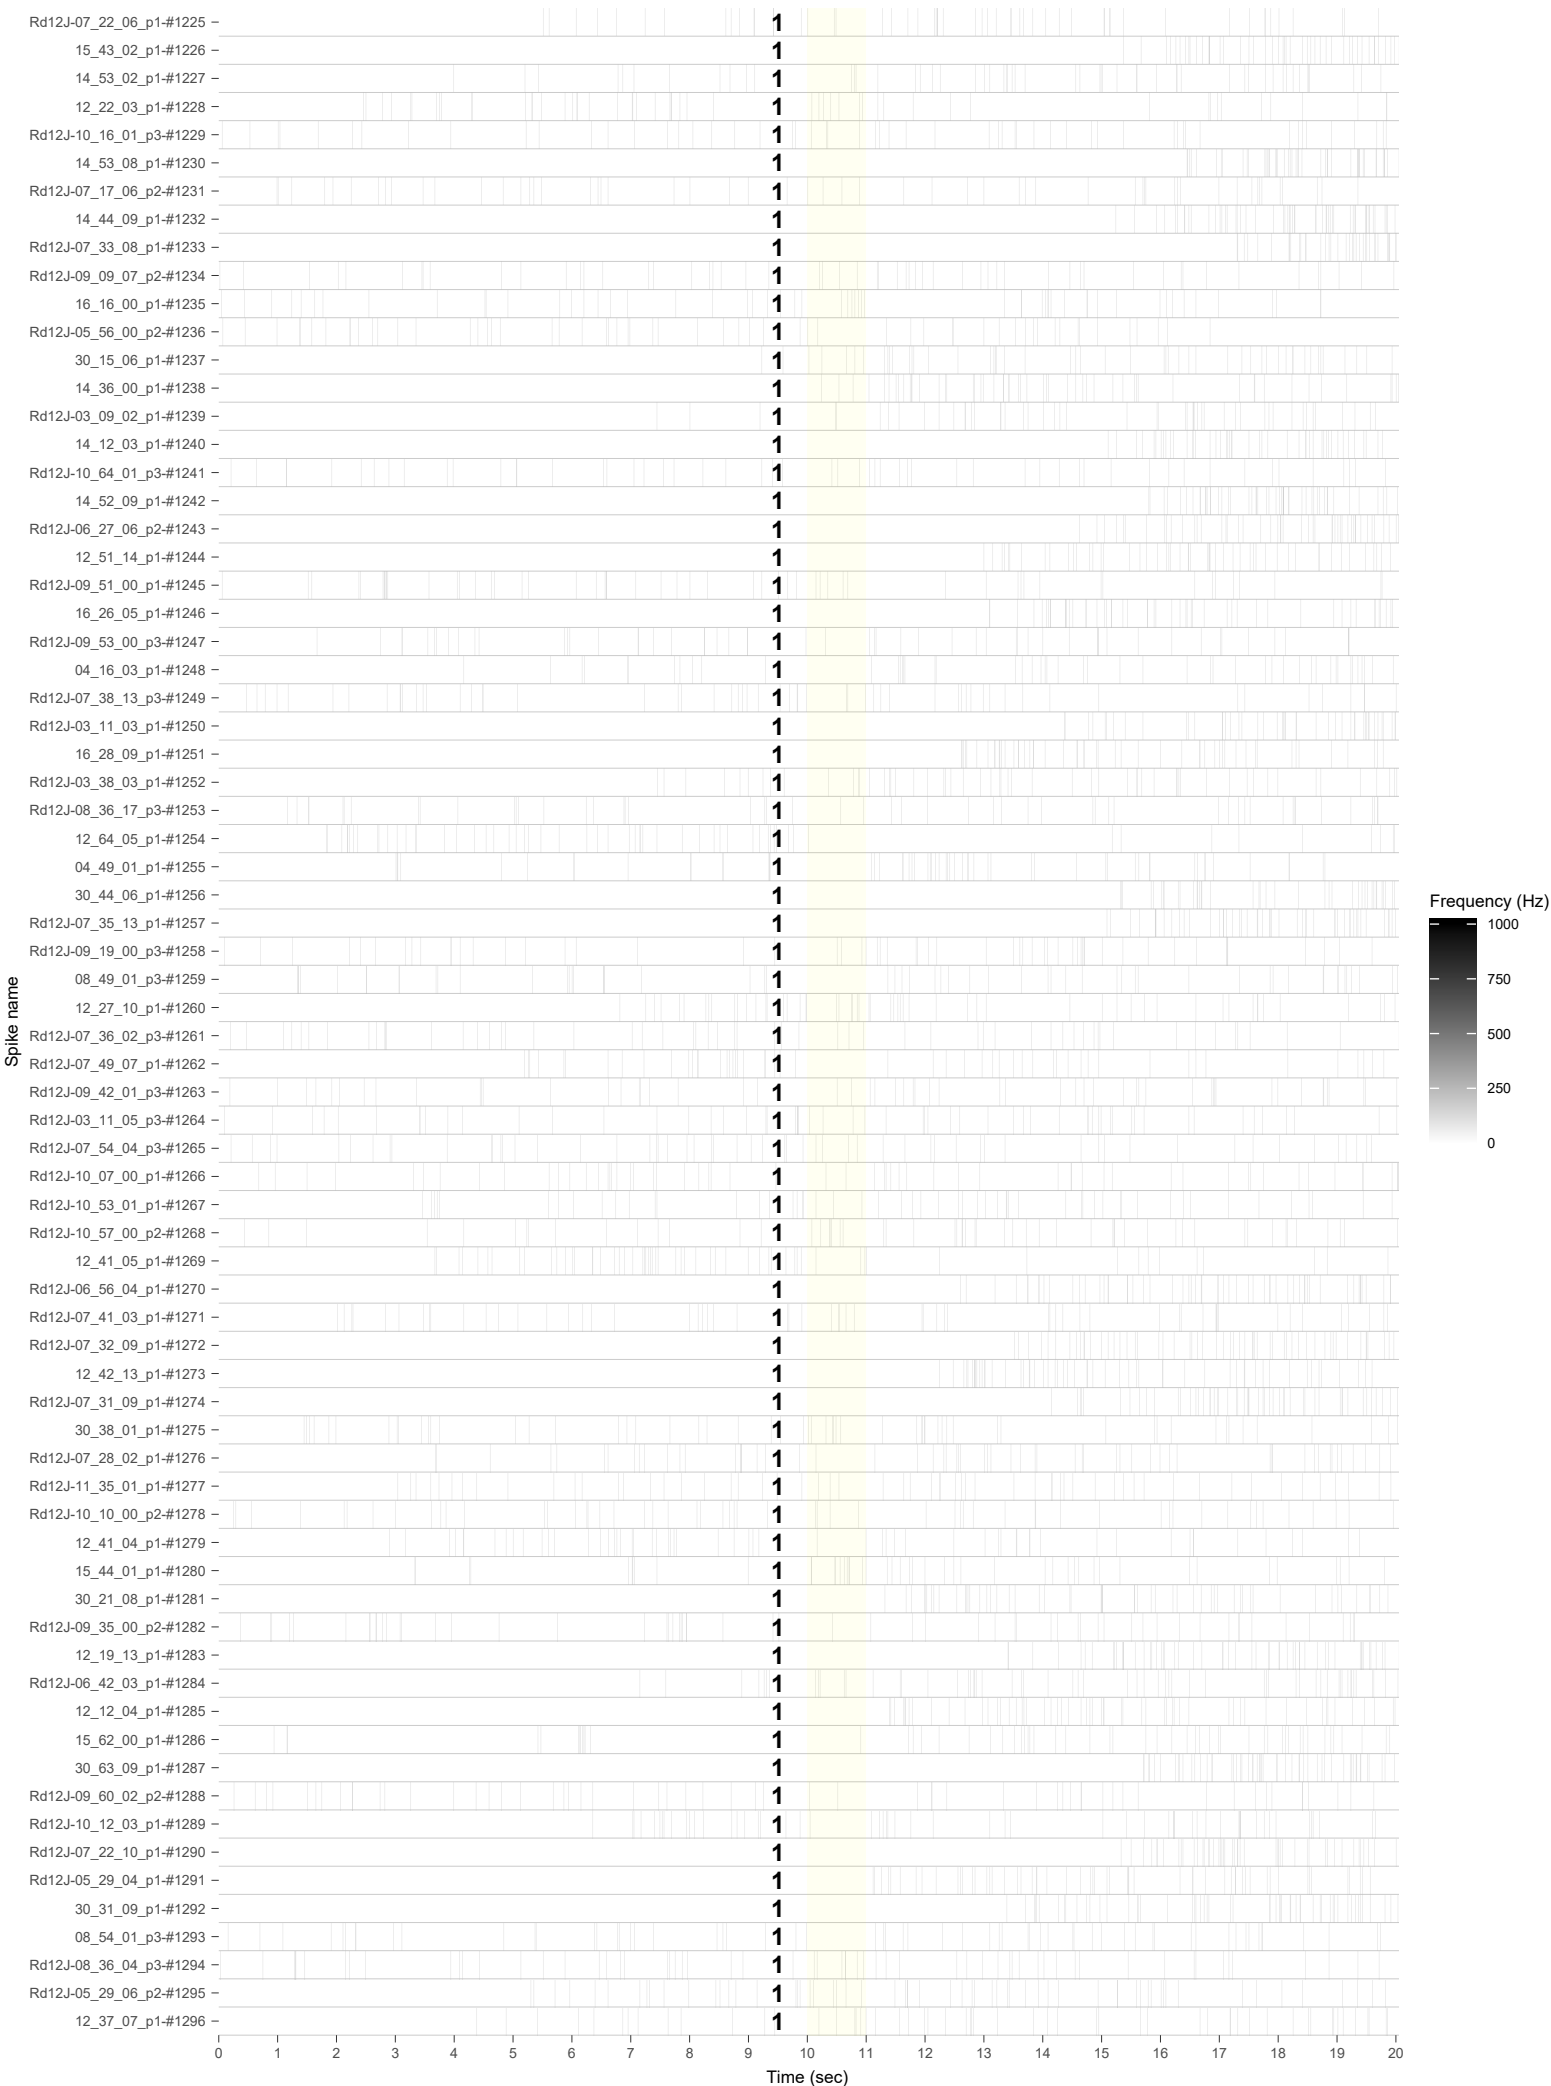

# Teaching dataset: Automatic clustering + Mandai modification (20160623125739) (page 19/54)

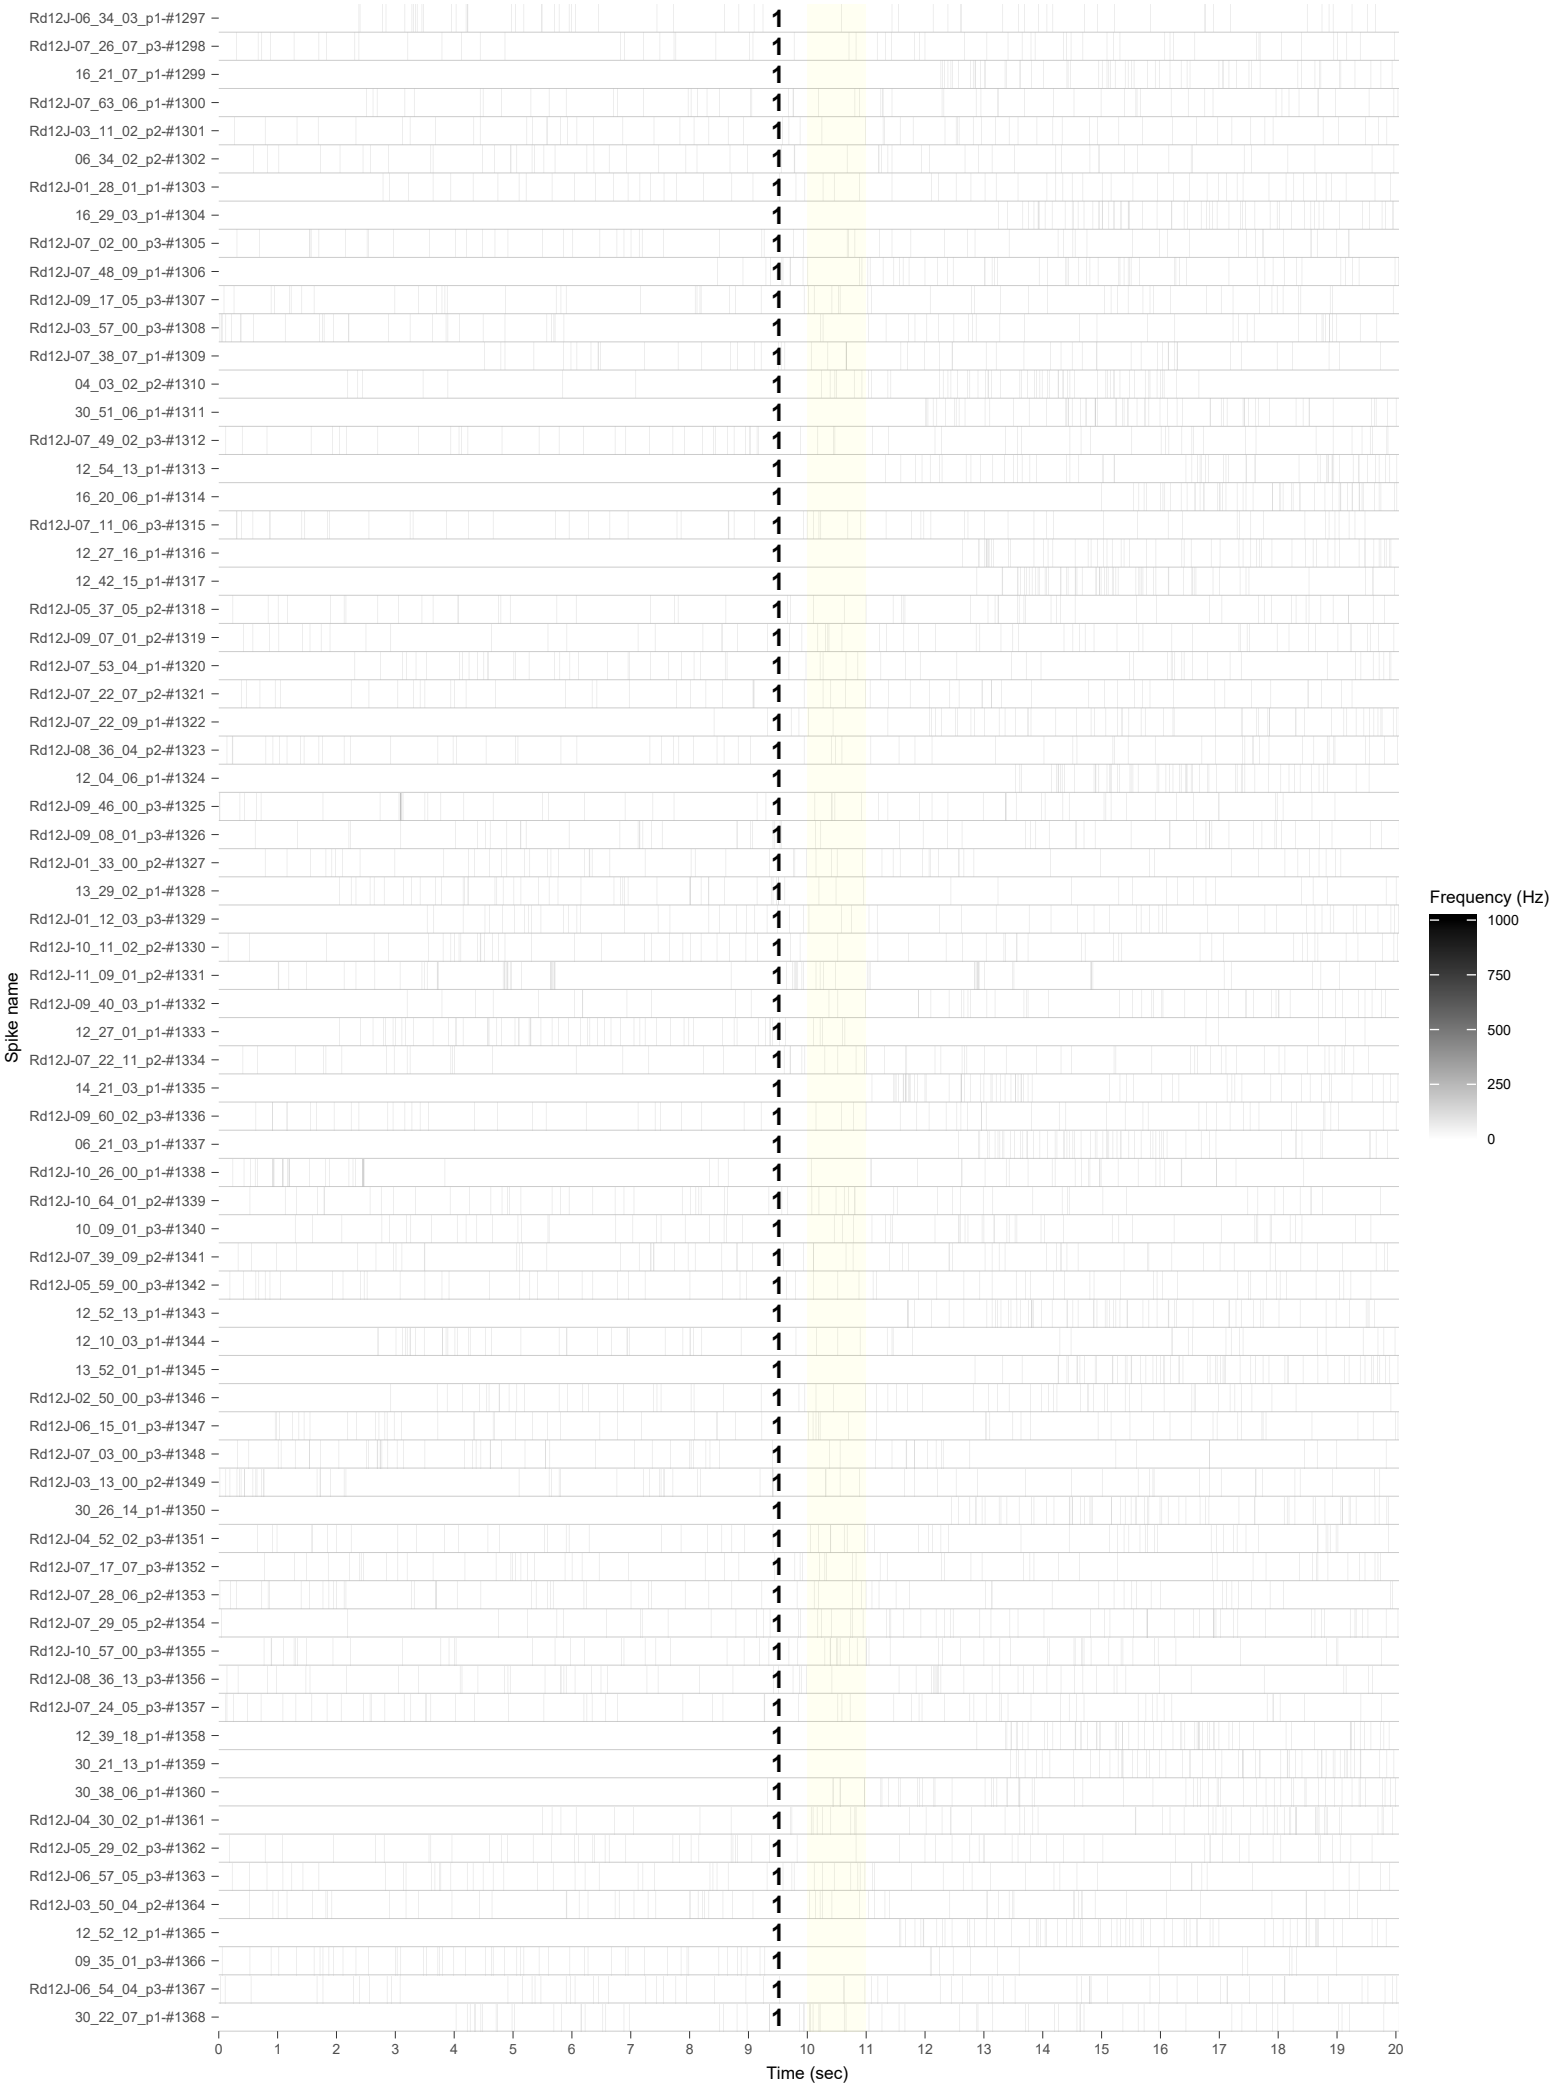

# Teaching dataset: Automatic clustering + Mandai modification (20160623125739) (page 20/54)

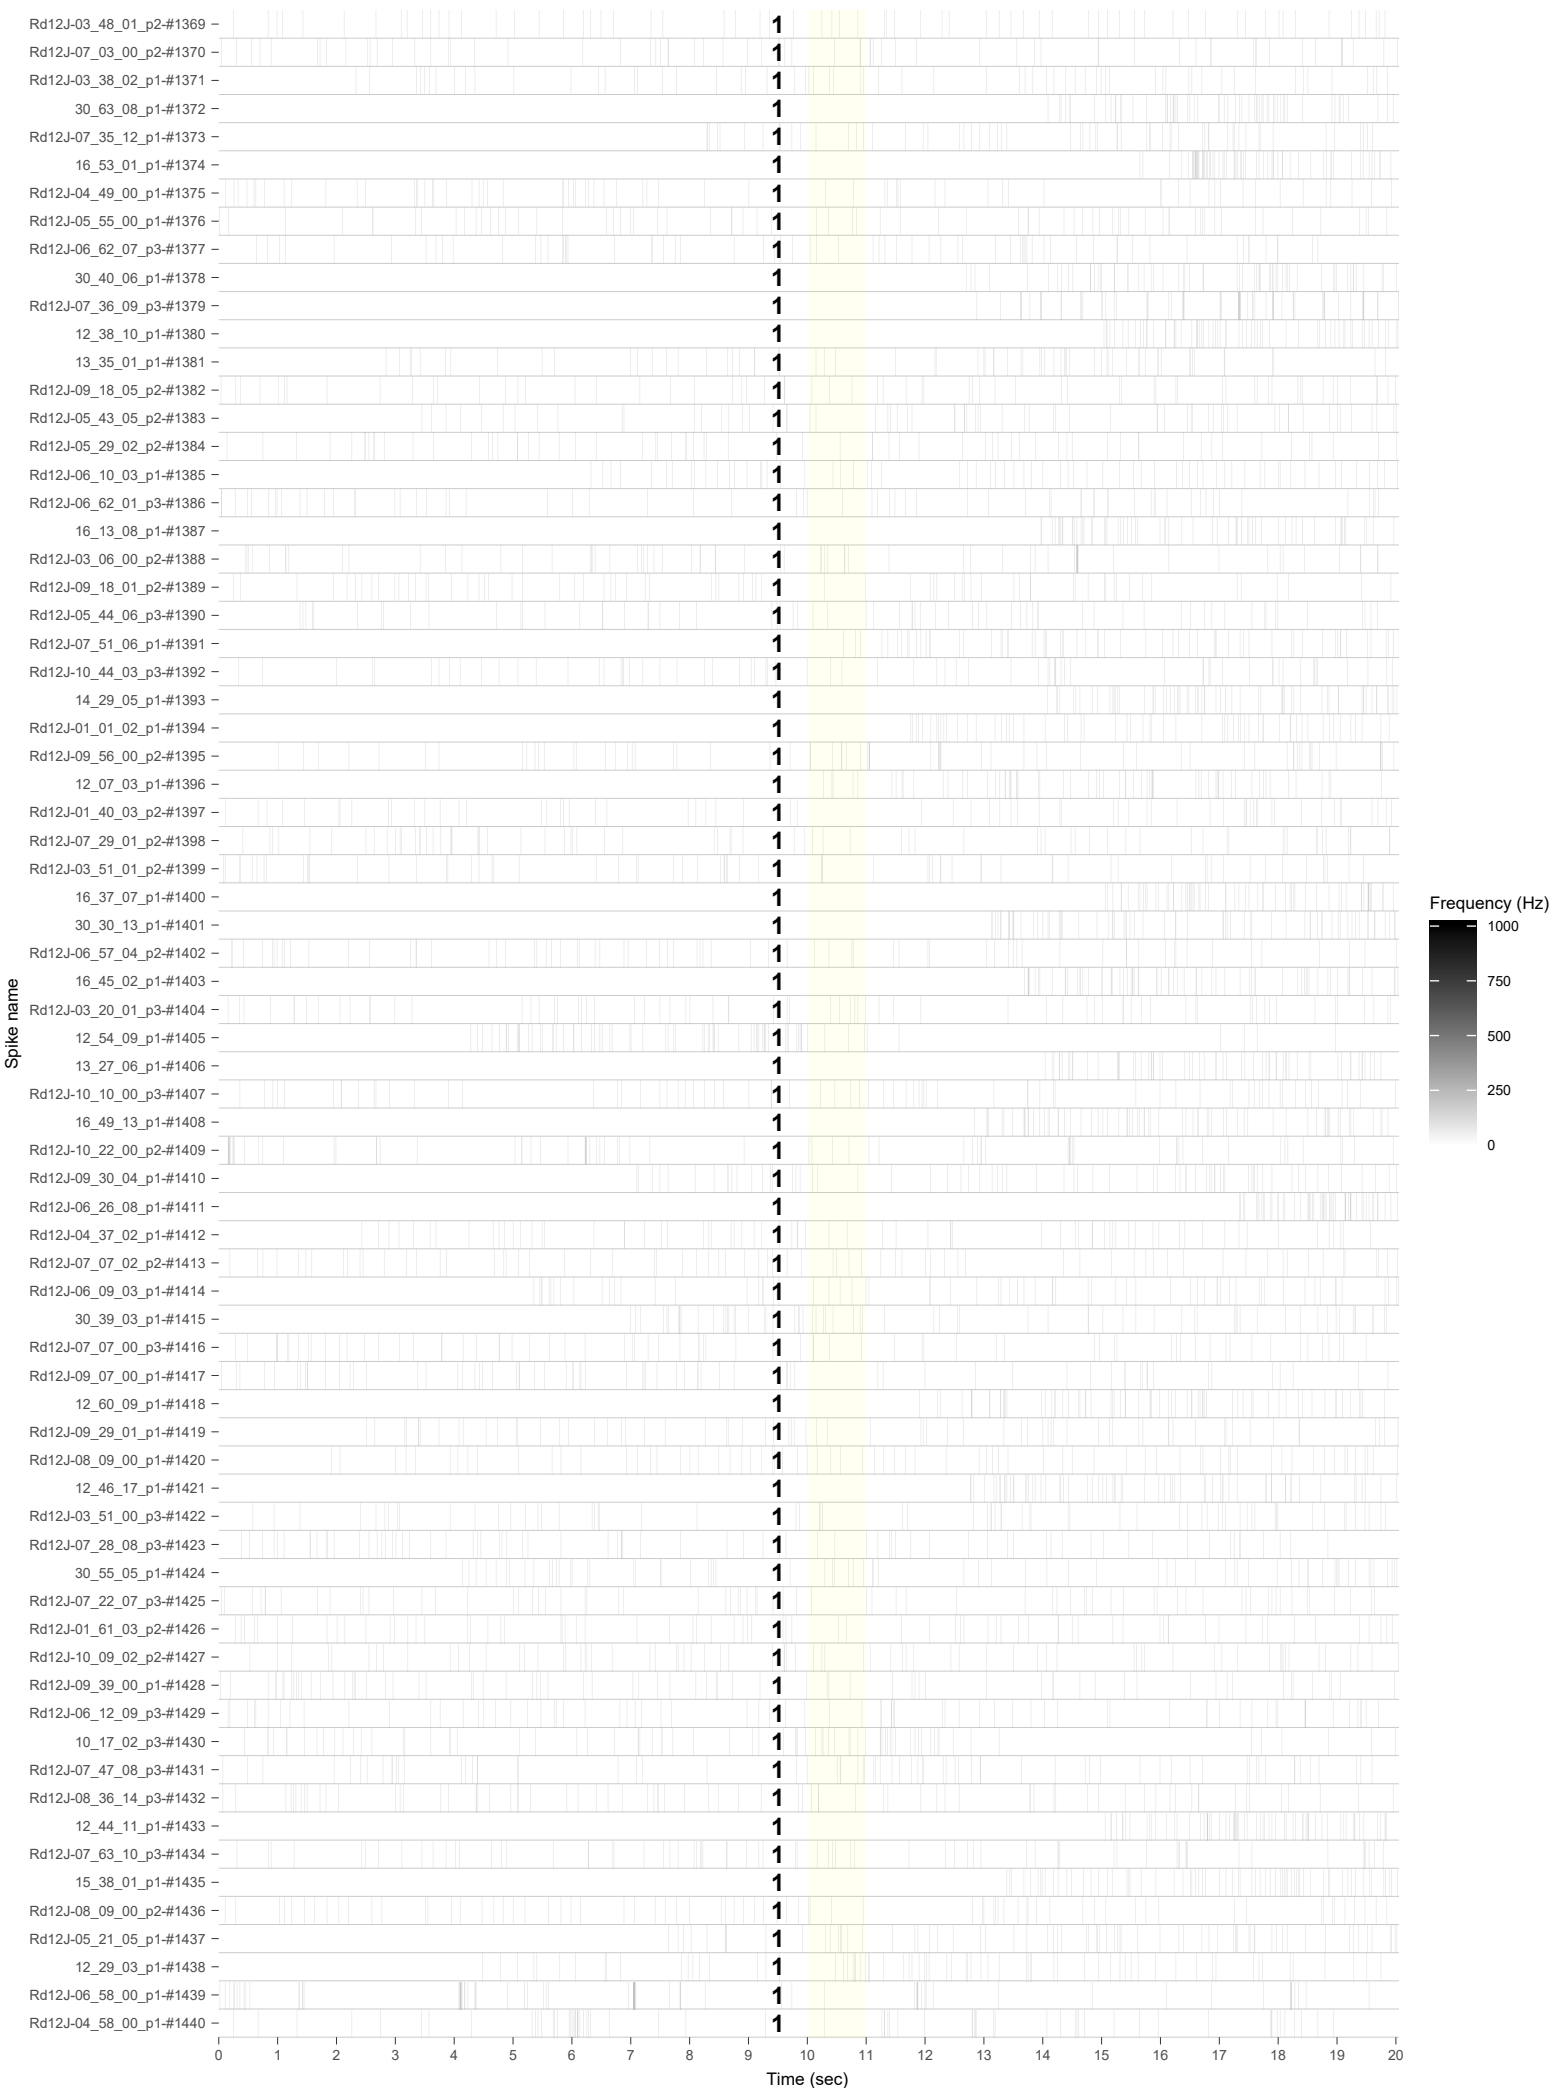

# Teaching dataset: Automatic clustering + Mandai modification (20160623125739) (page 21/54)

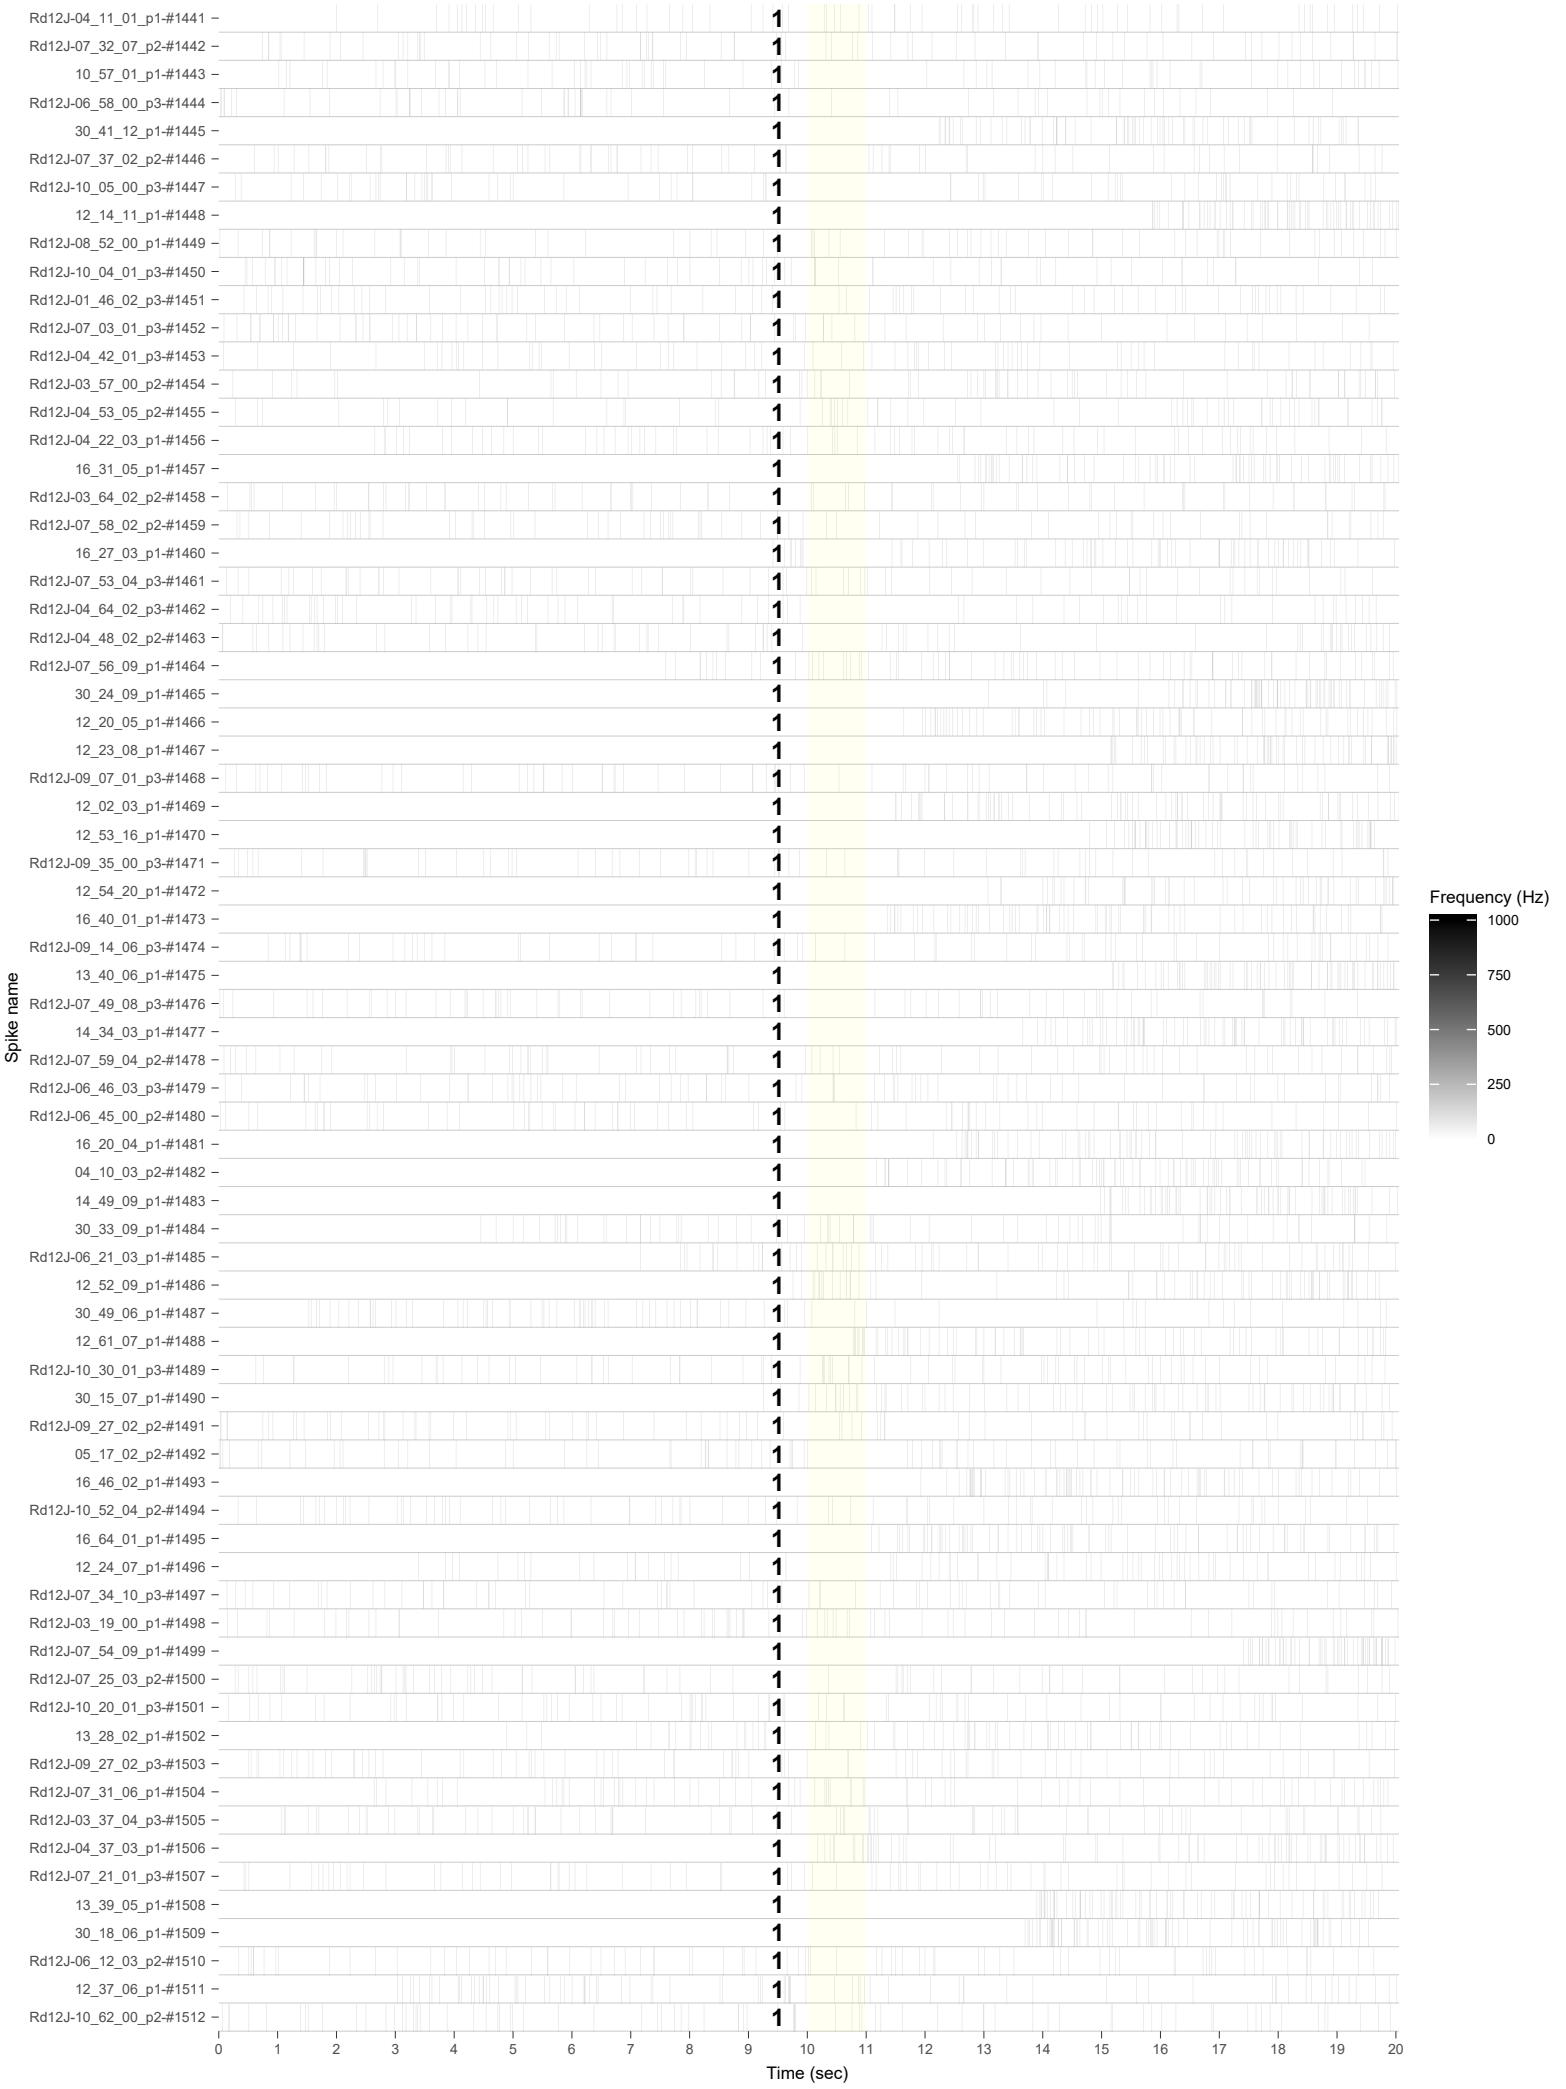

# Teaching dataset: Automatic clustering + Mandai modification (20160623125739) (page 22/54)

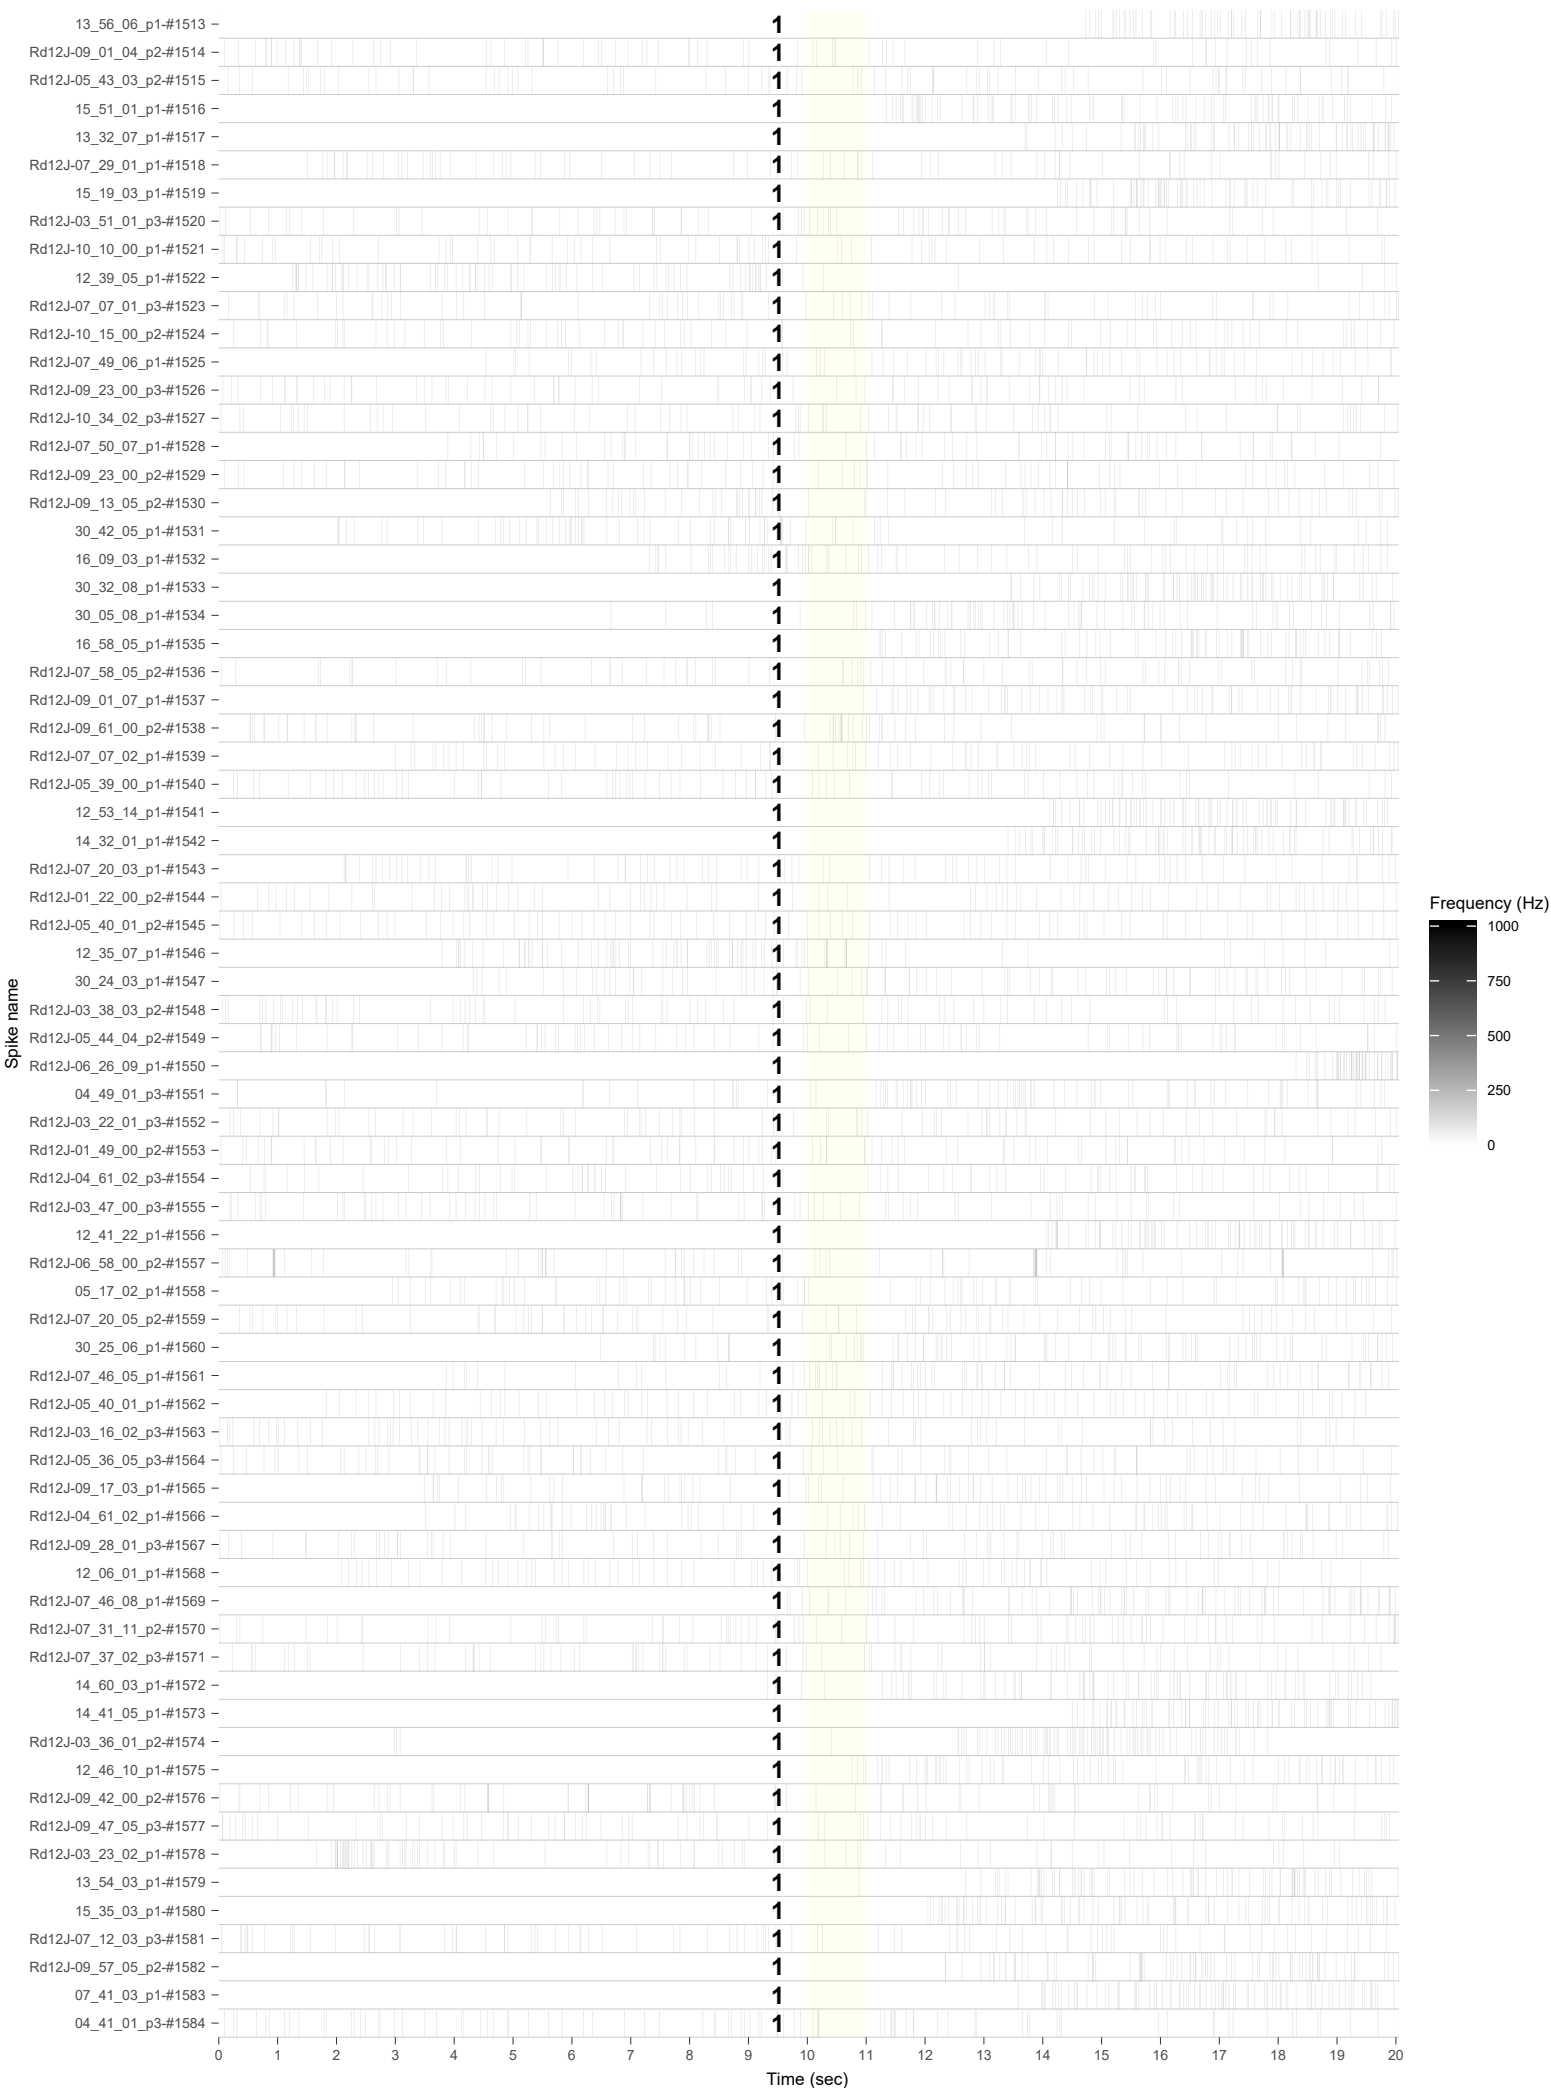

# Teaching dataset: Automatic clustering + Mandai modification (20160623125739) (page 23/54)

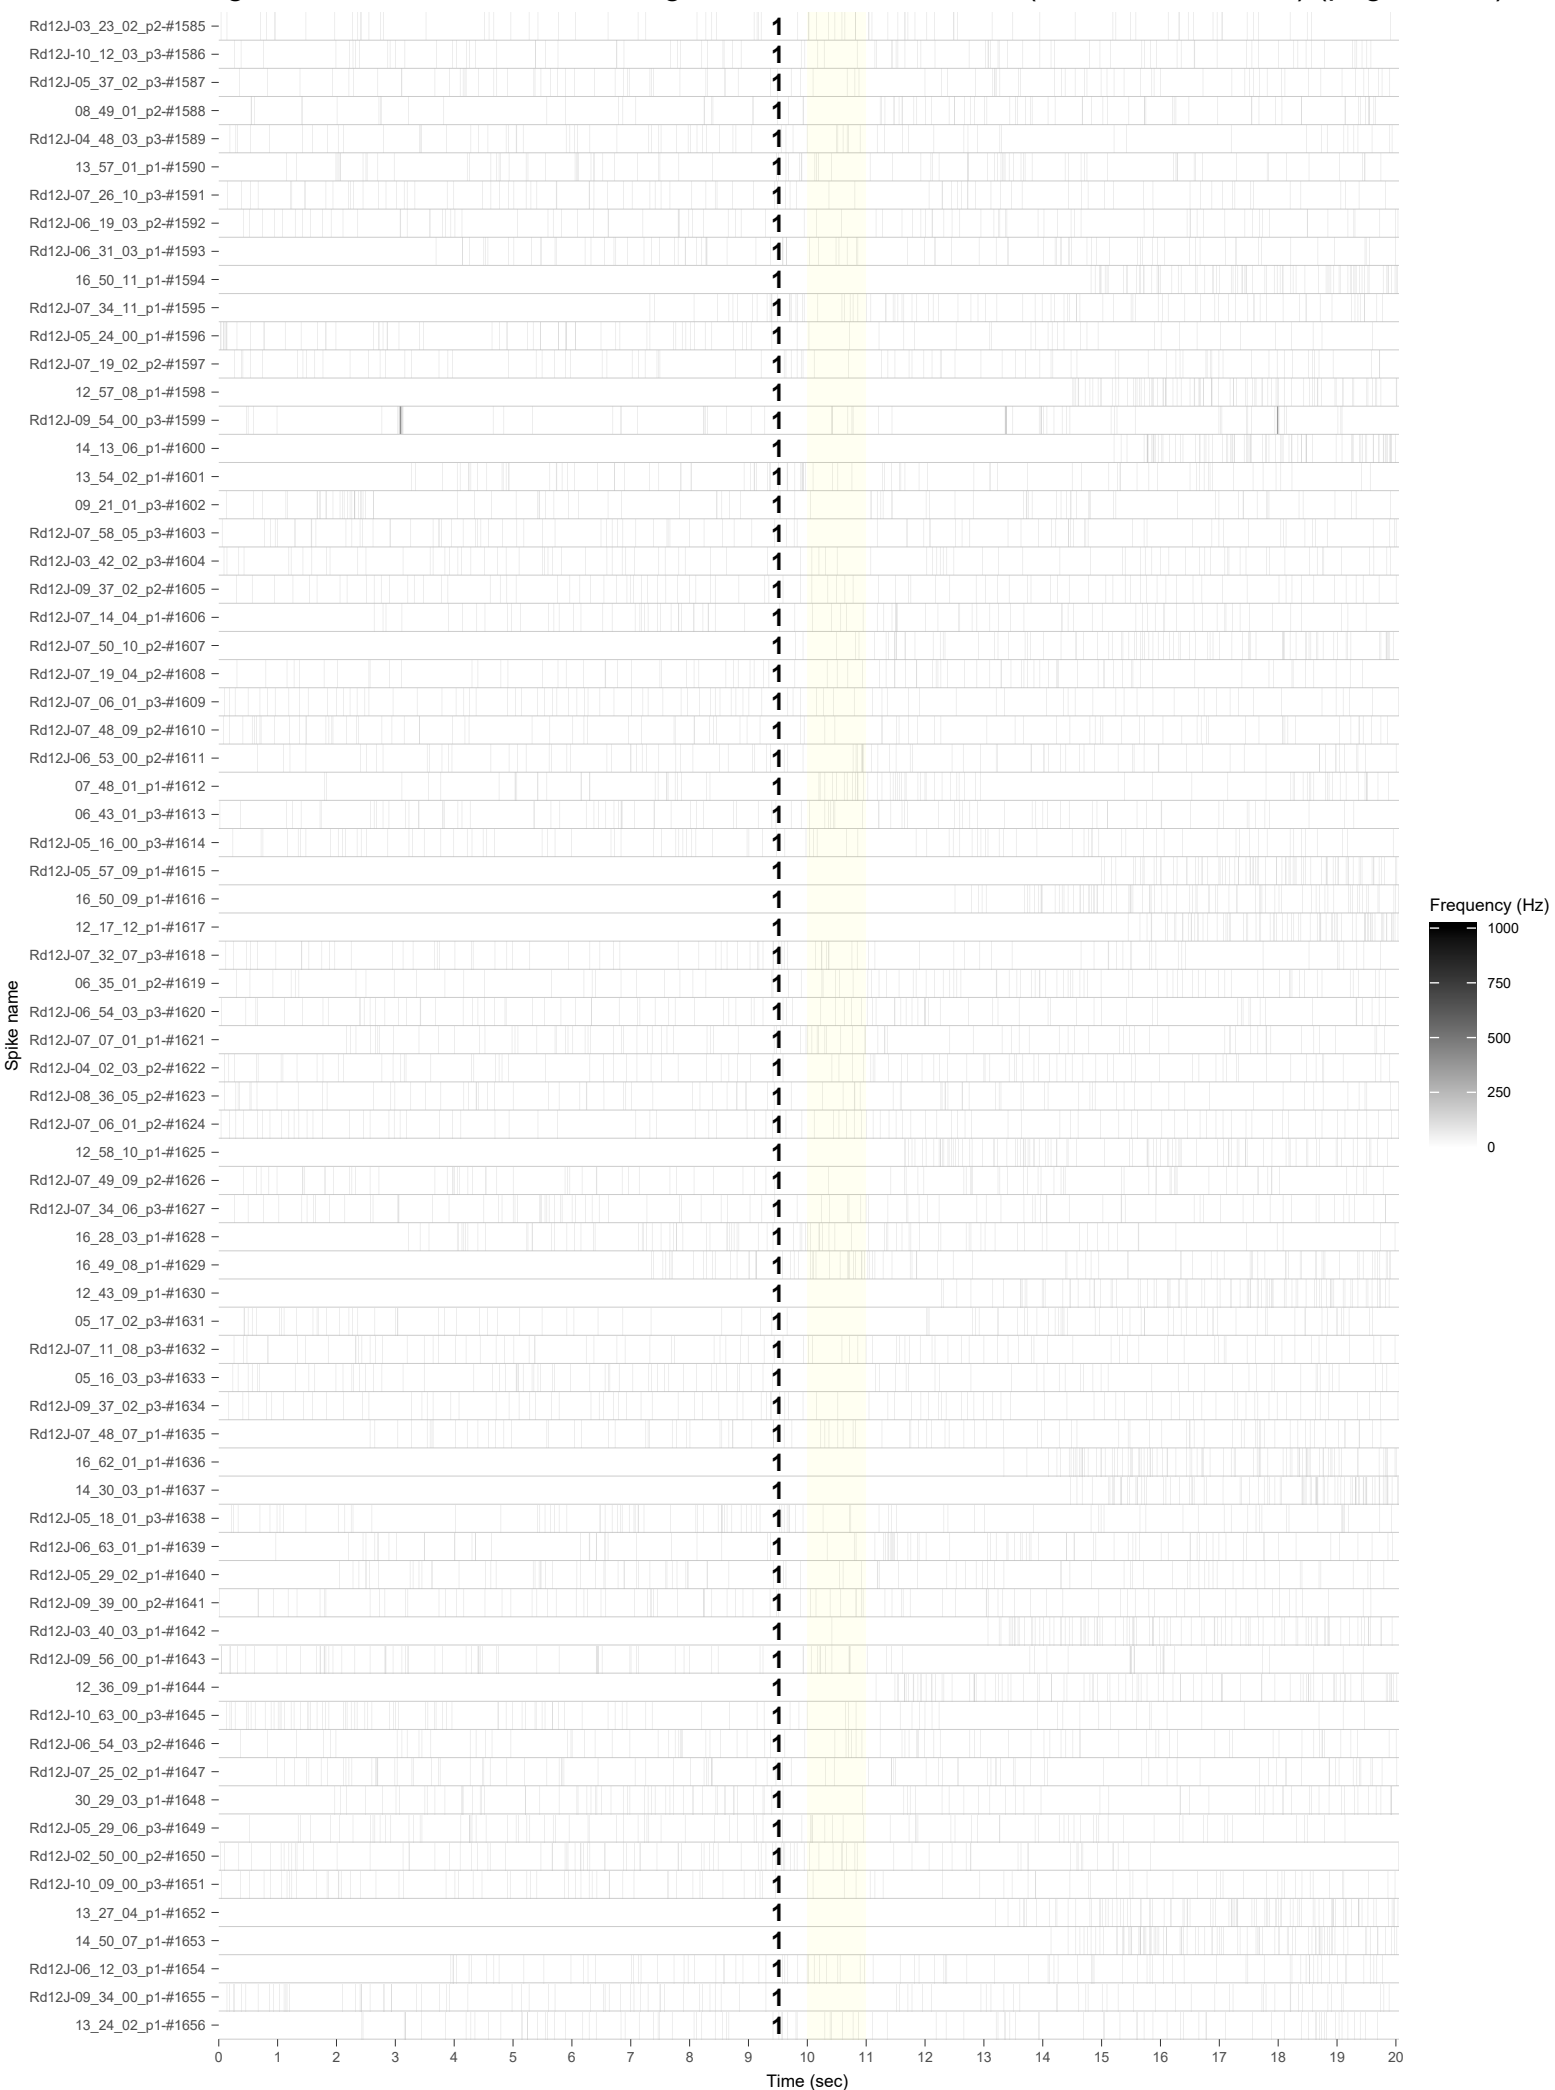

# Teaching dataset: Automatic clustering + Mandai modification (20160623125739) (page 24/54)

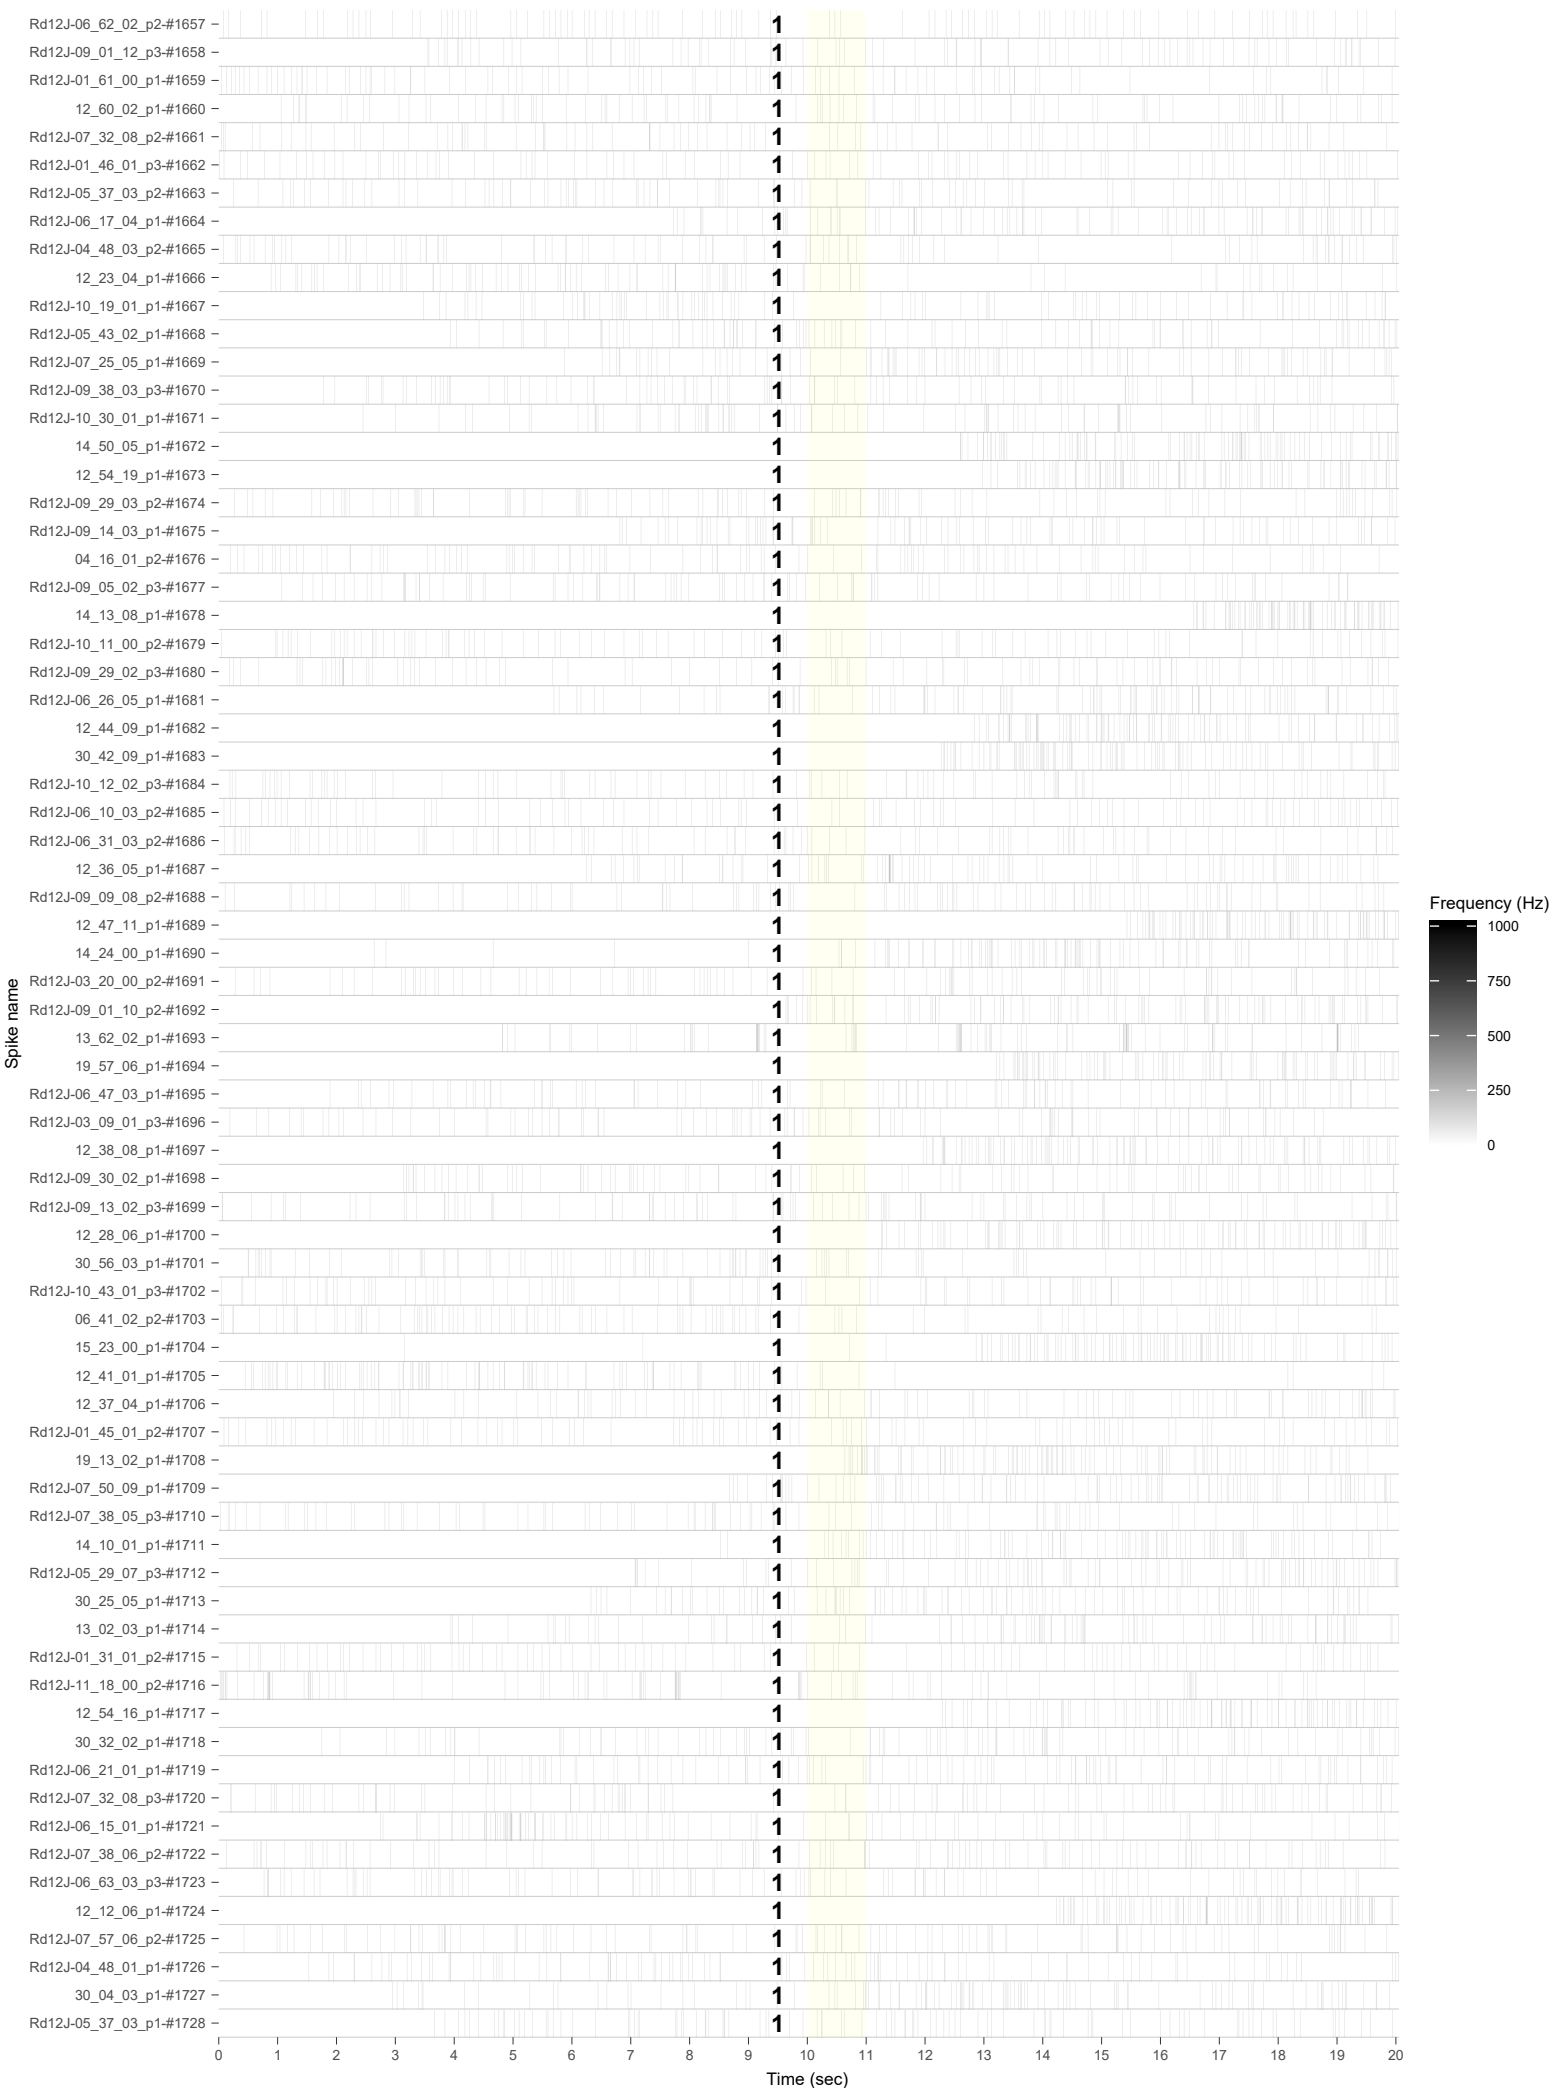



# Teaching dataset: Automatic clustering + Mandai modification (20160623125739) (page 25/54)

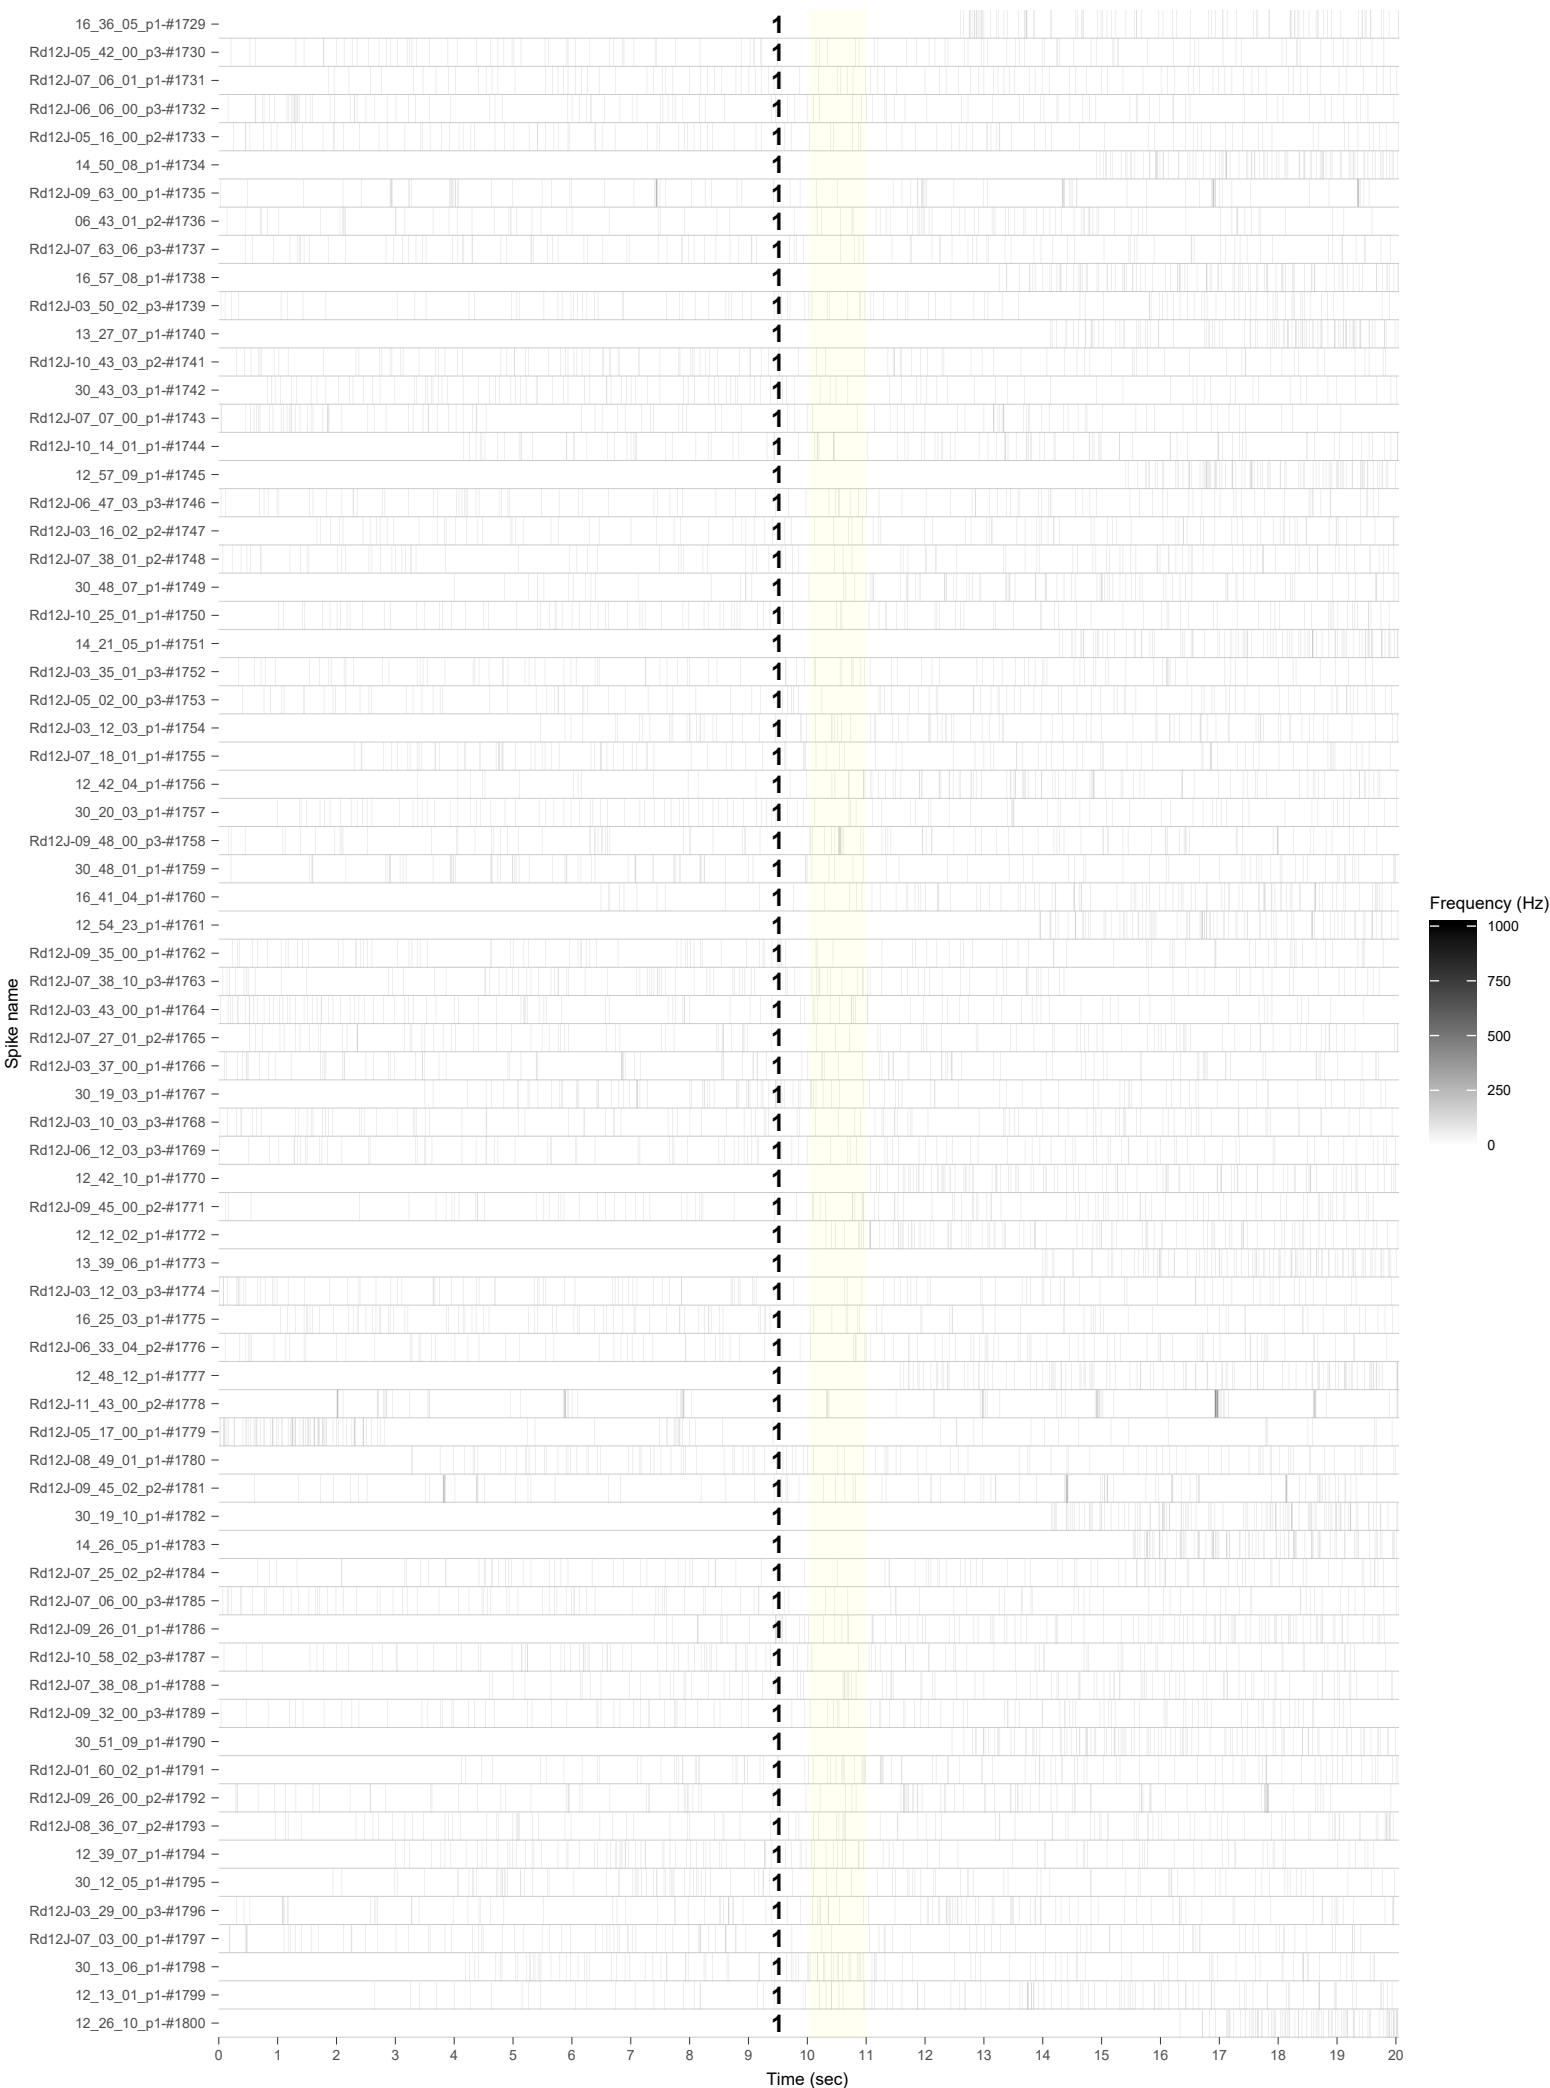

# Teaching dataset: Automatic clustering + Mandai modification (20160623125739) (page 26/54)

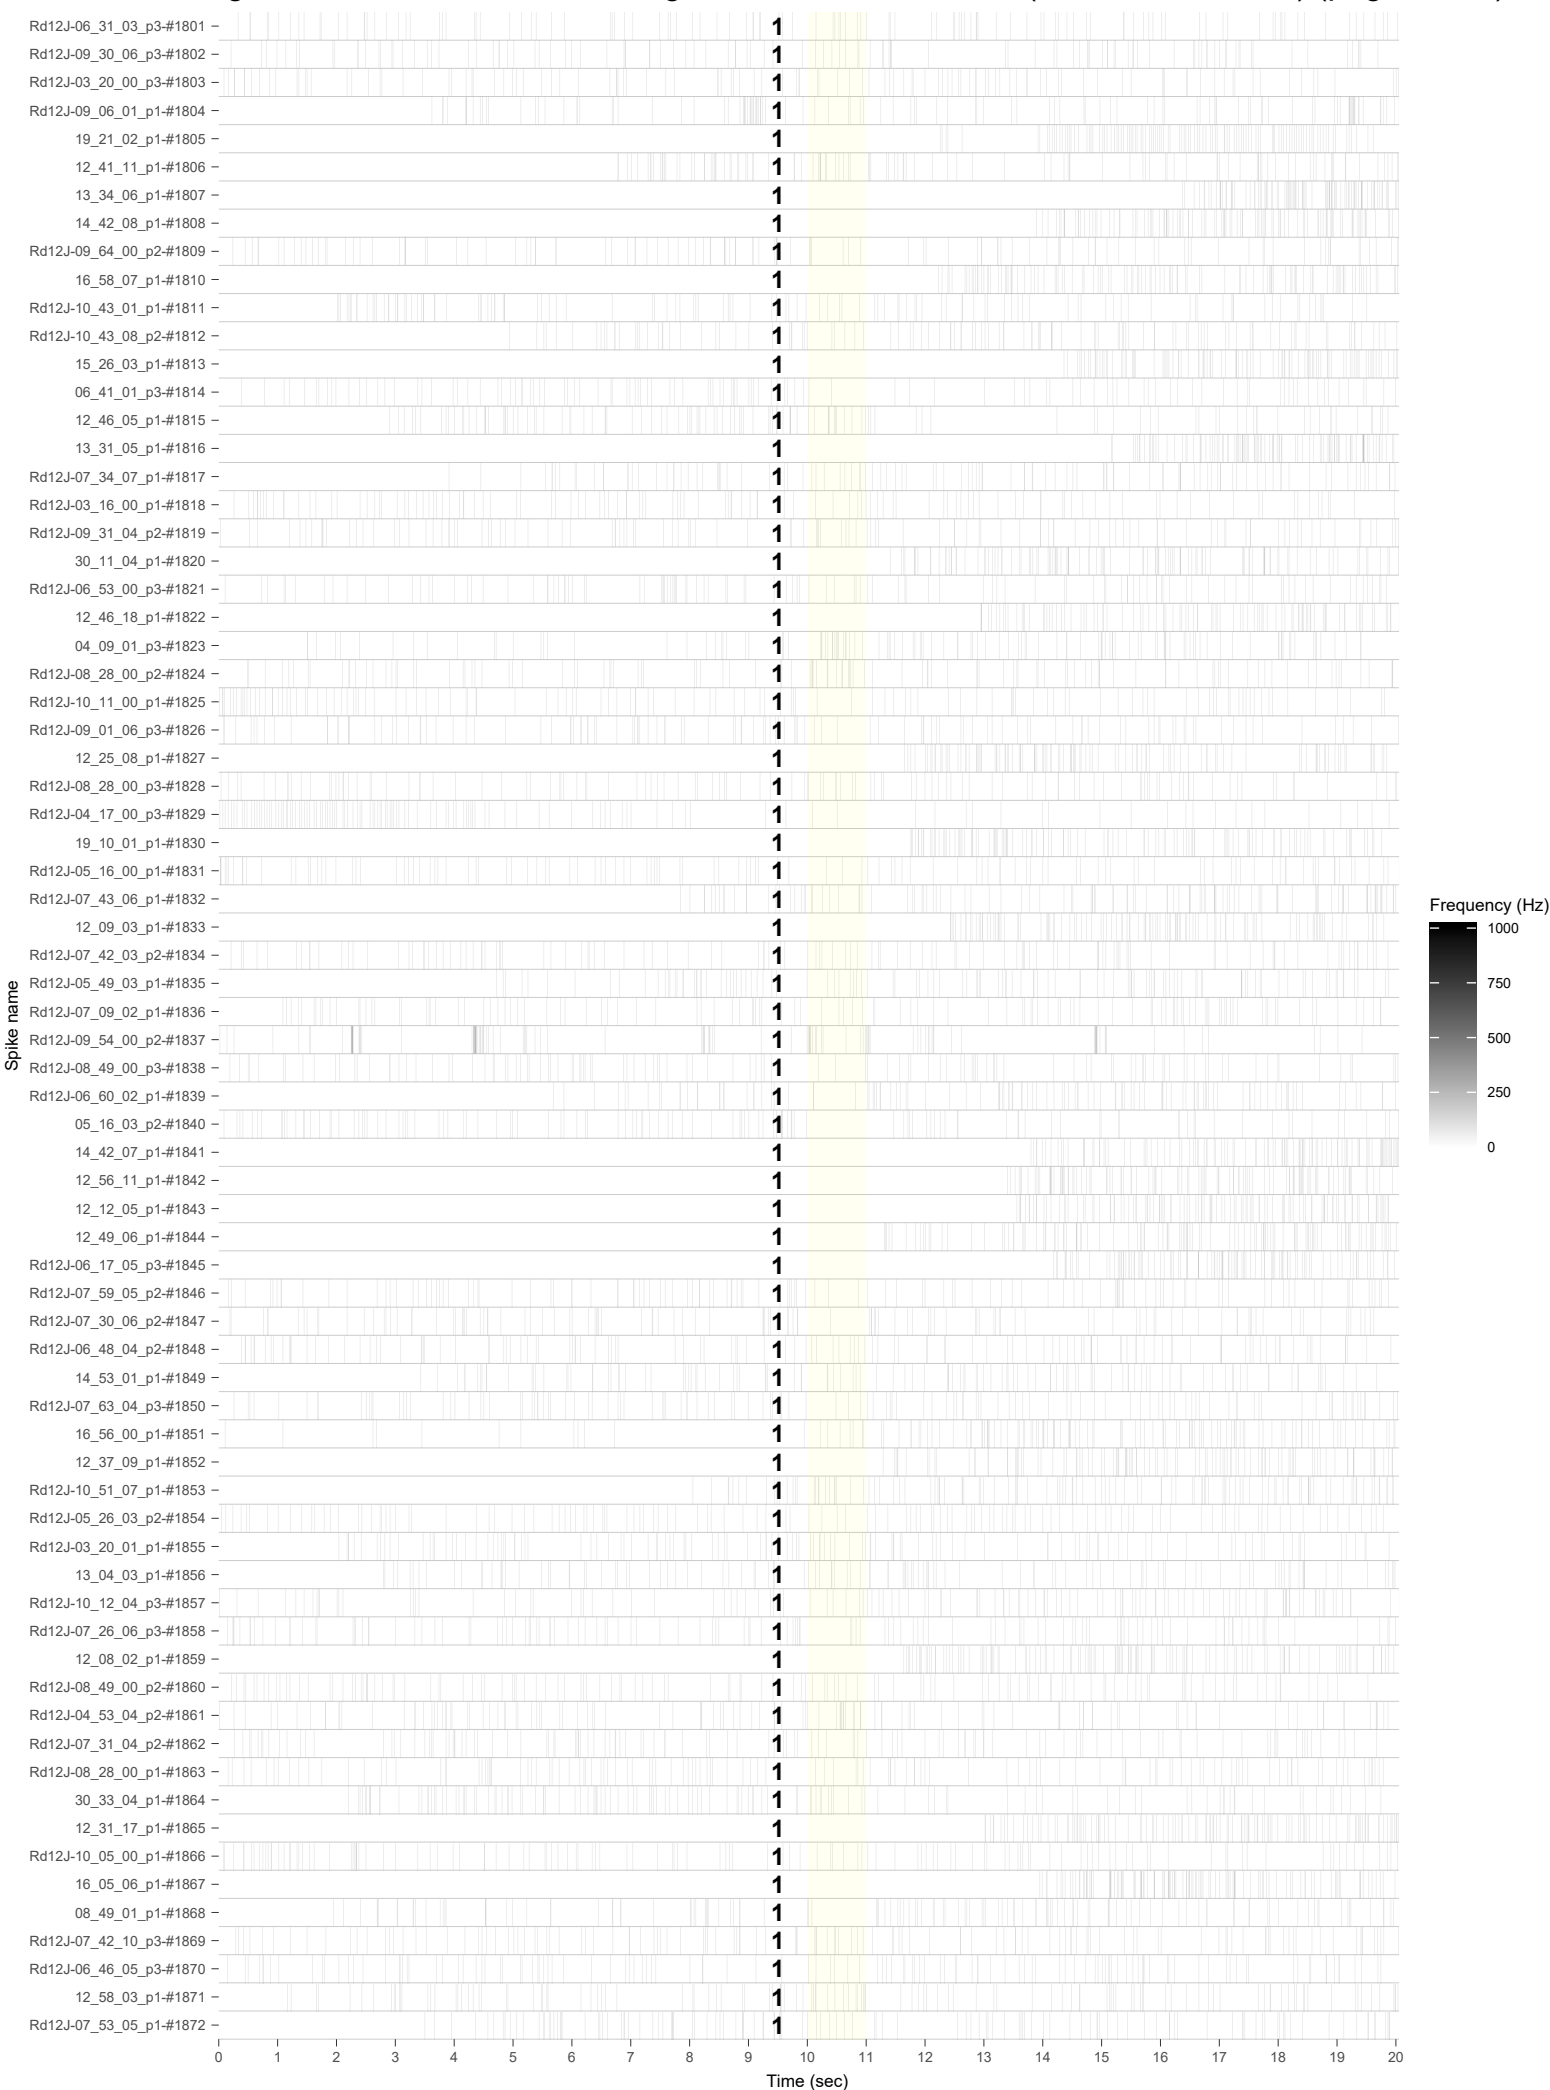

# Teaching dataset: Automatic clustering + Mandai modification (20160623125739) (page 27/54)

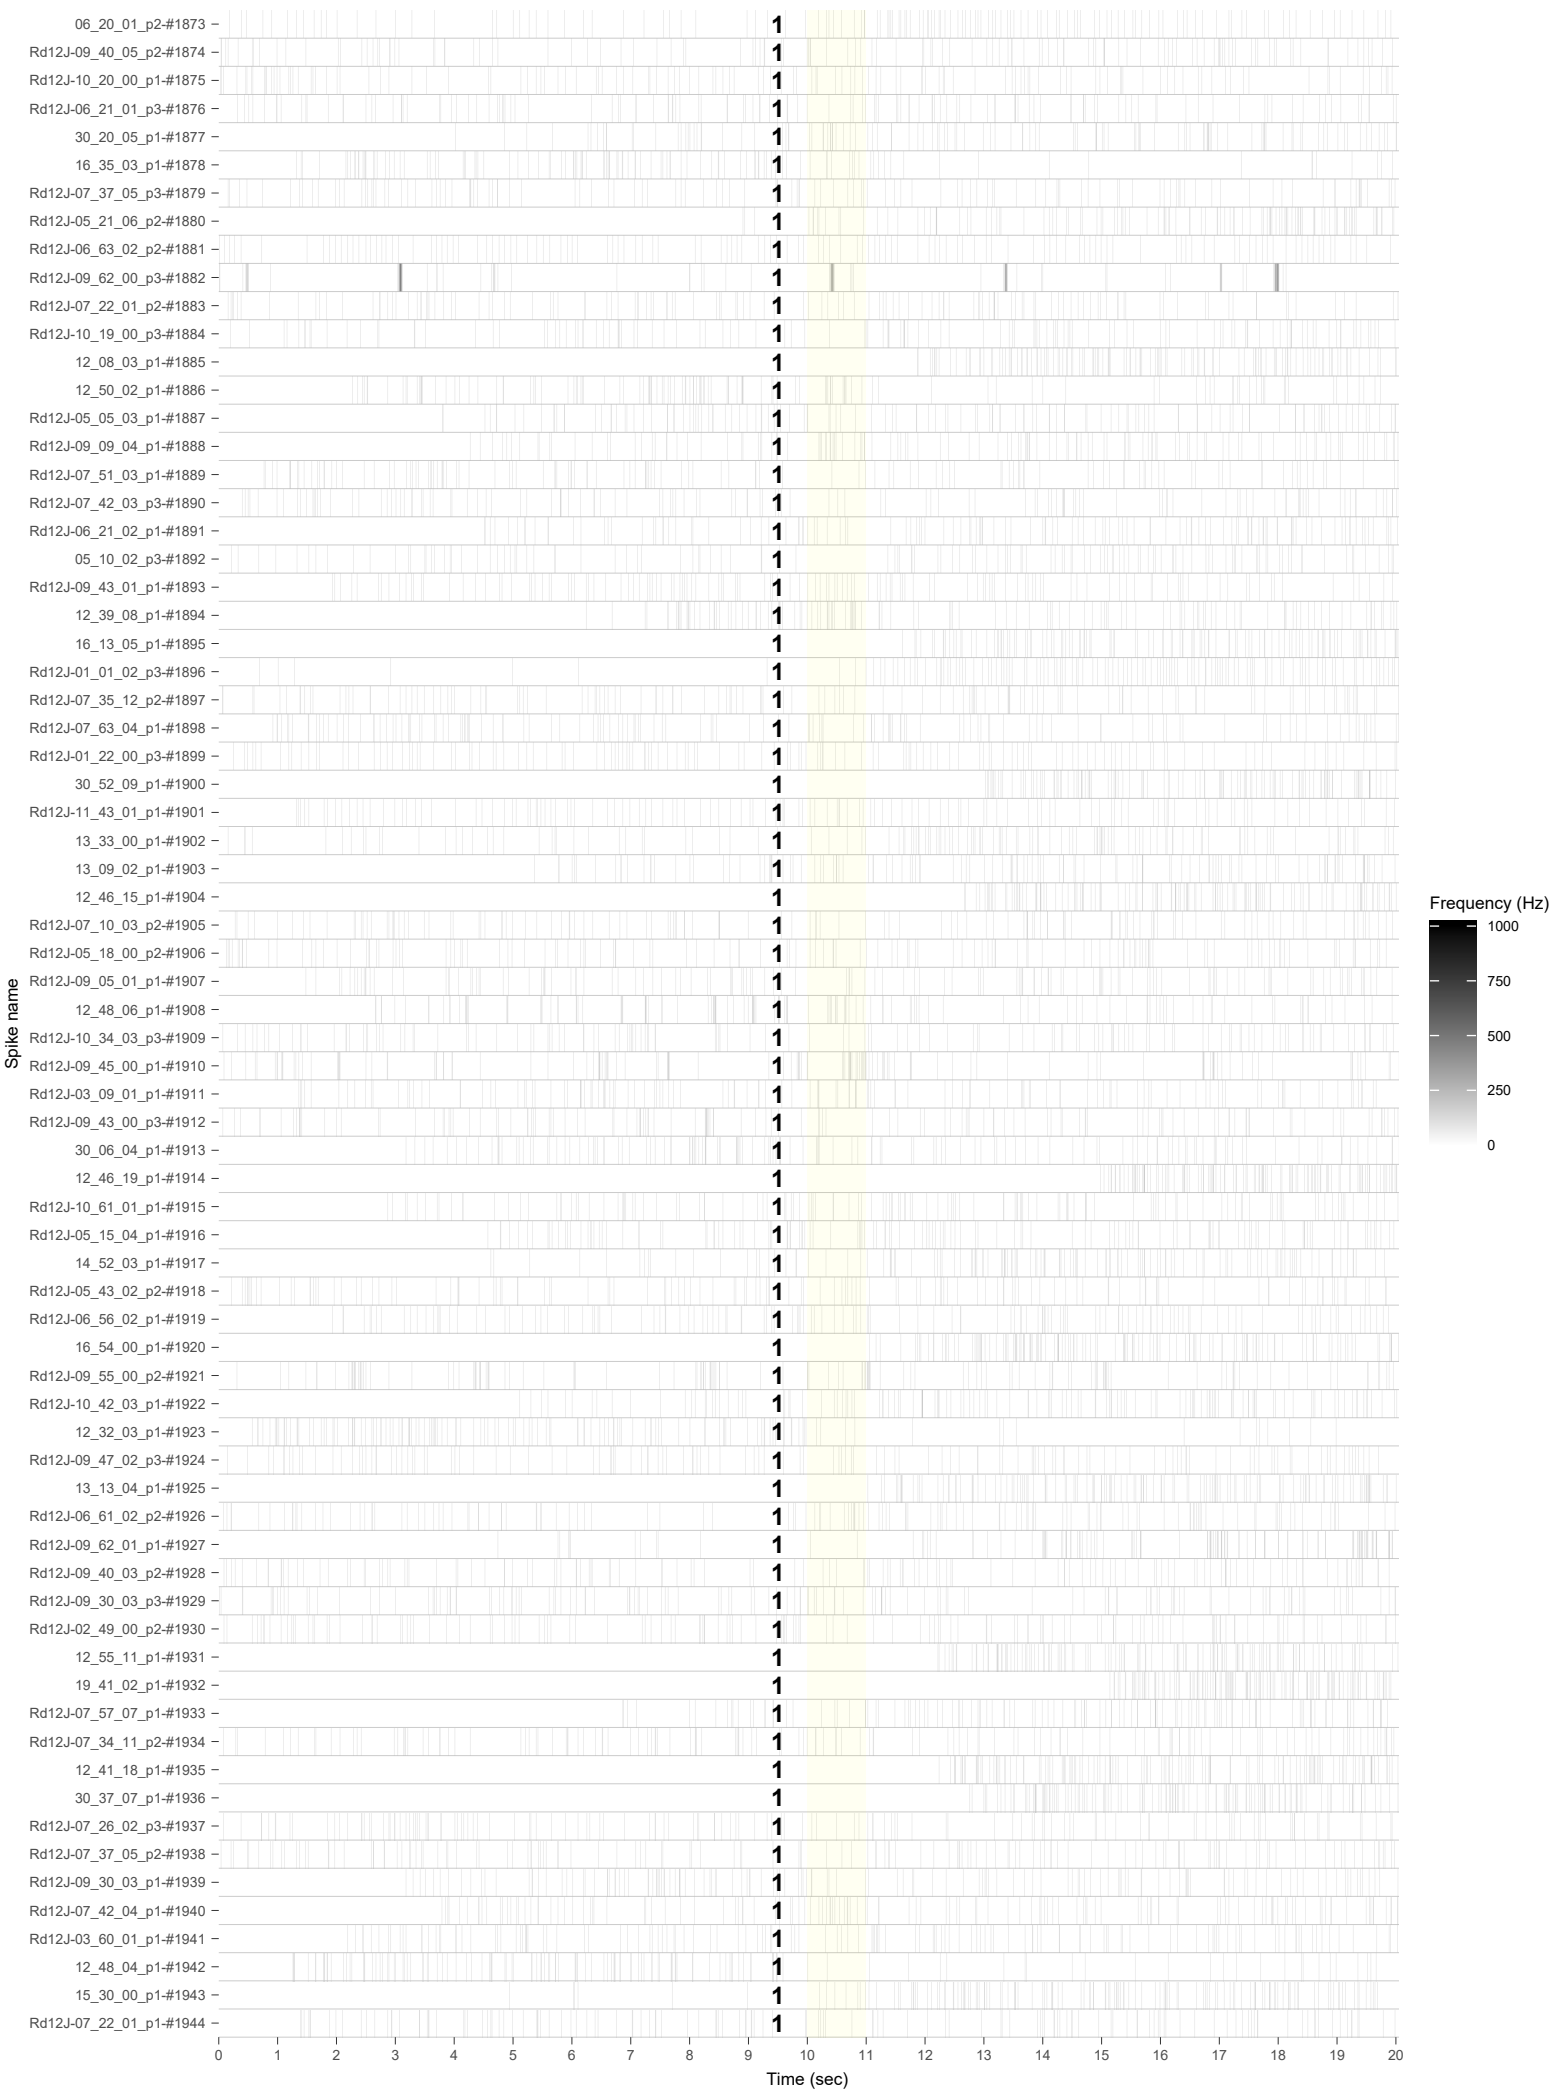

# Teaching dataset: Automatic clustering + Mandai modification (20160623125739) (page 28/54)

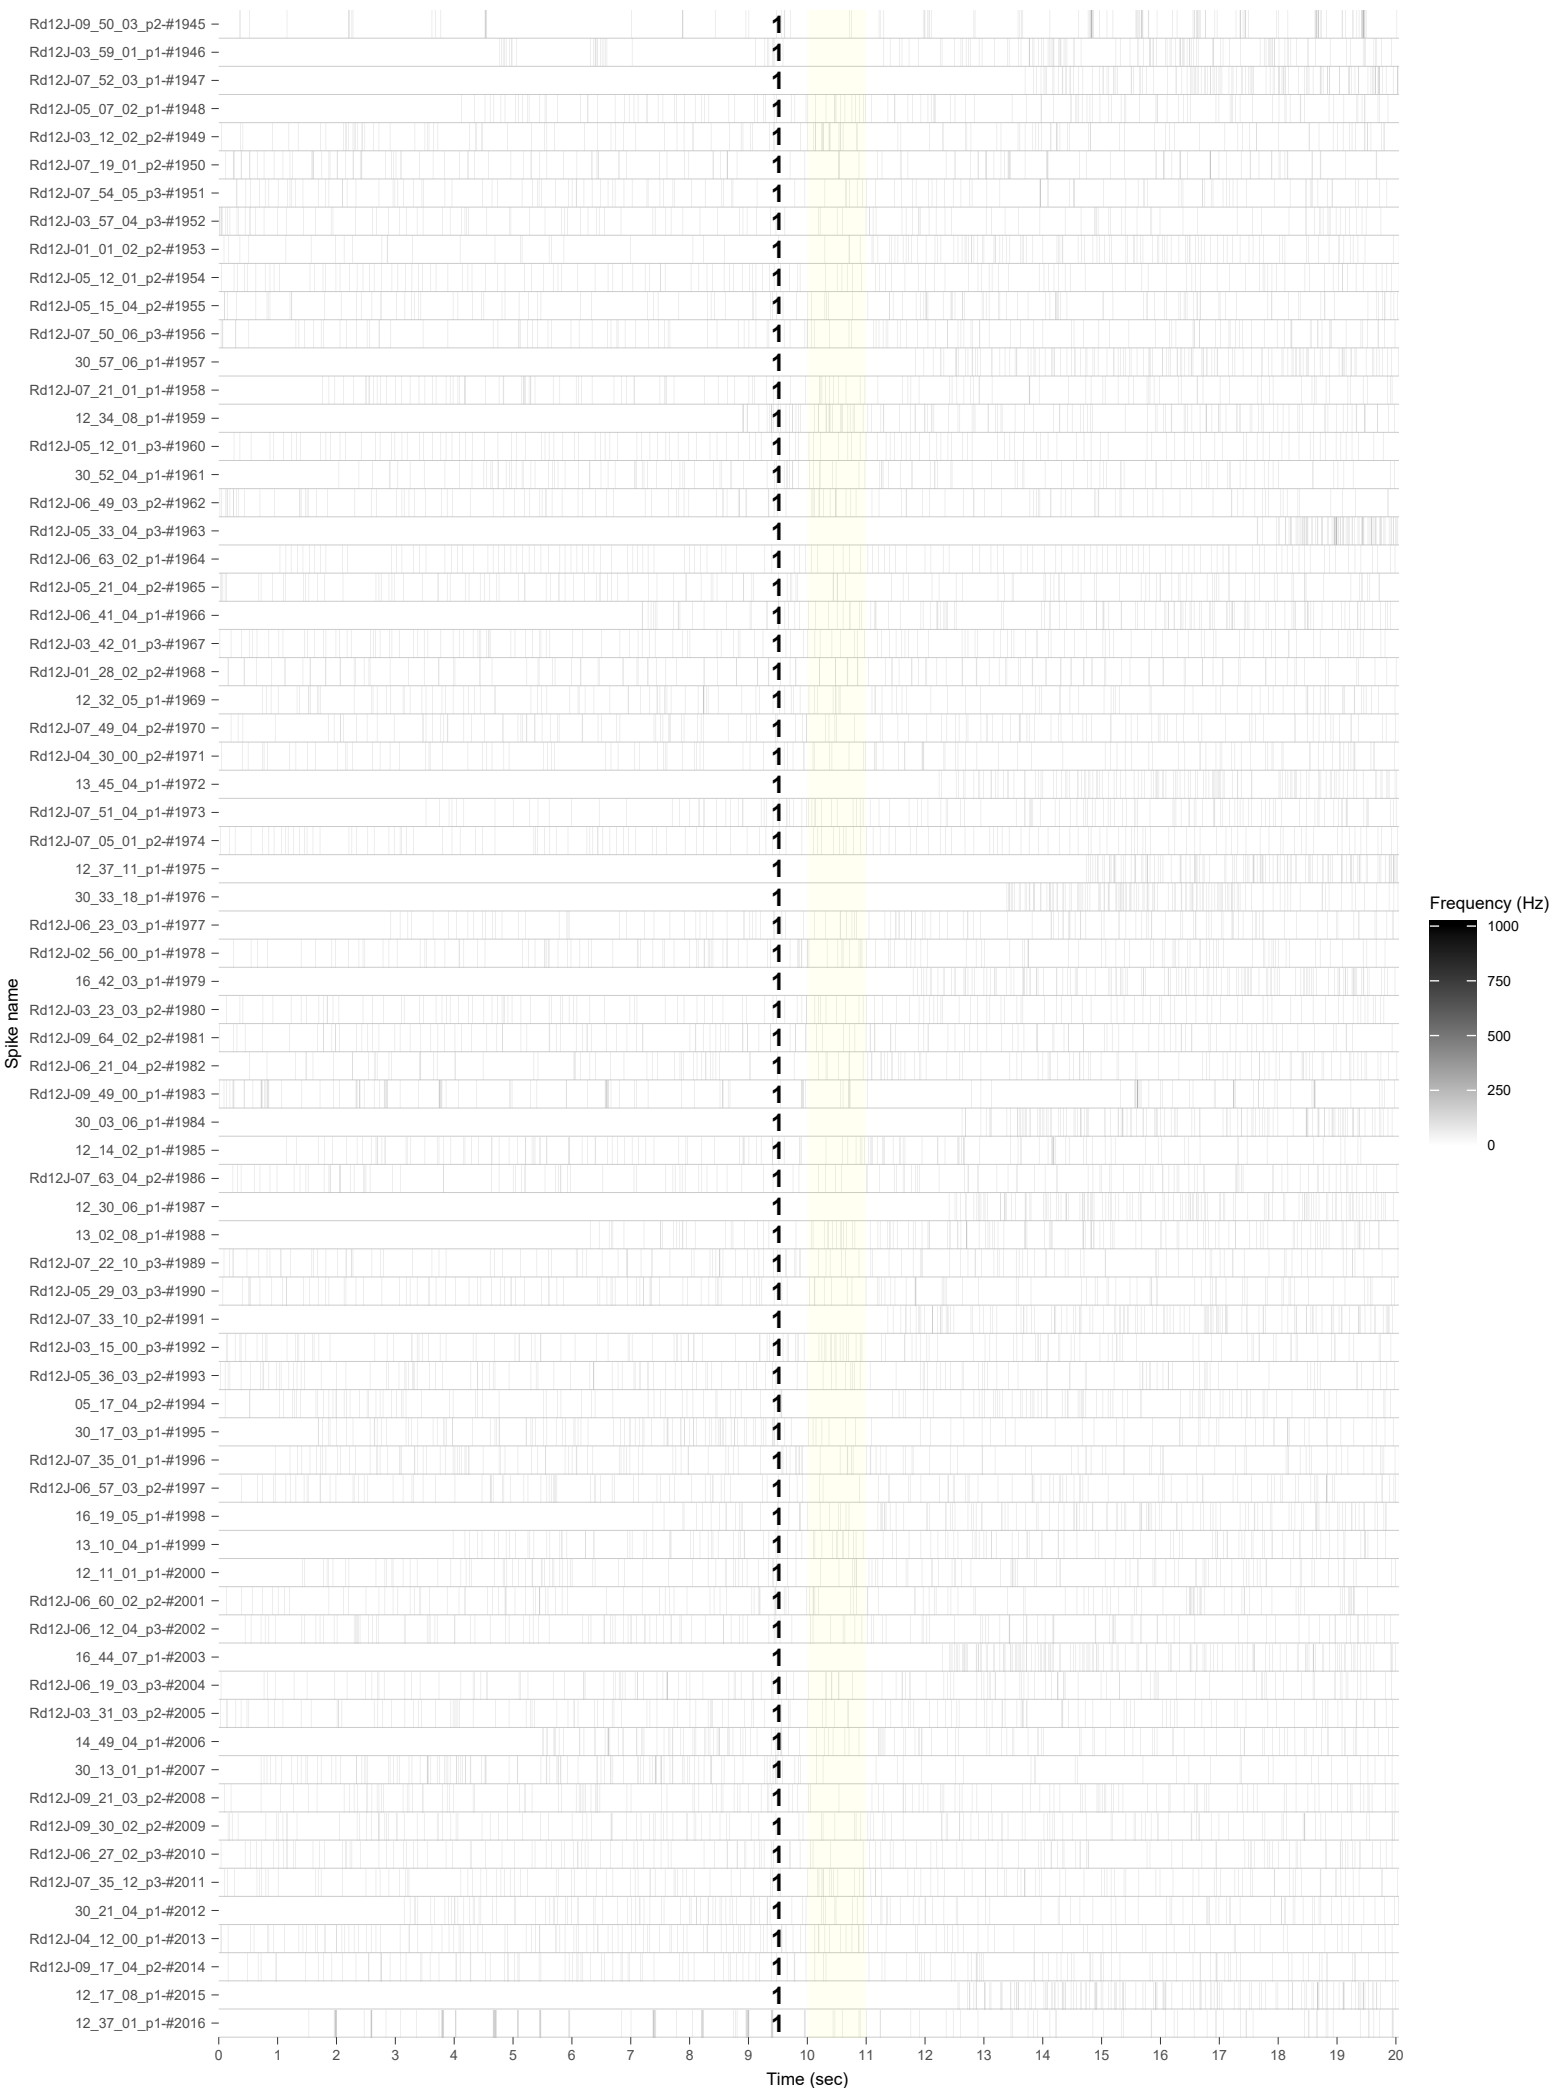

# Teaching dataset: Automatic clustering + Mandai modification (20160623125739) (page 29/54)

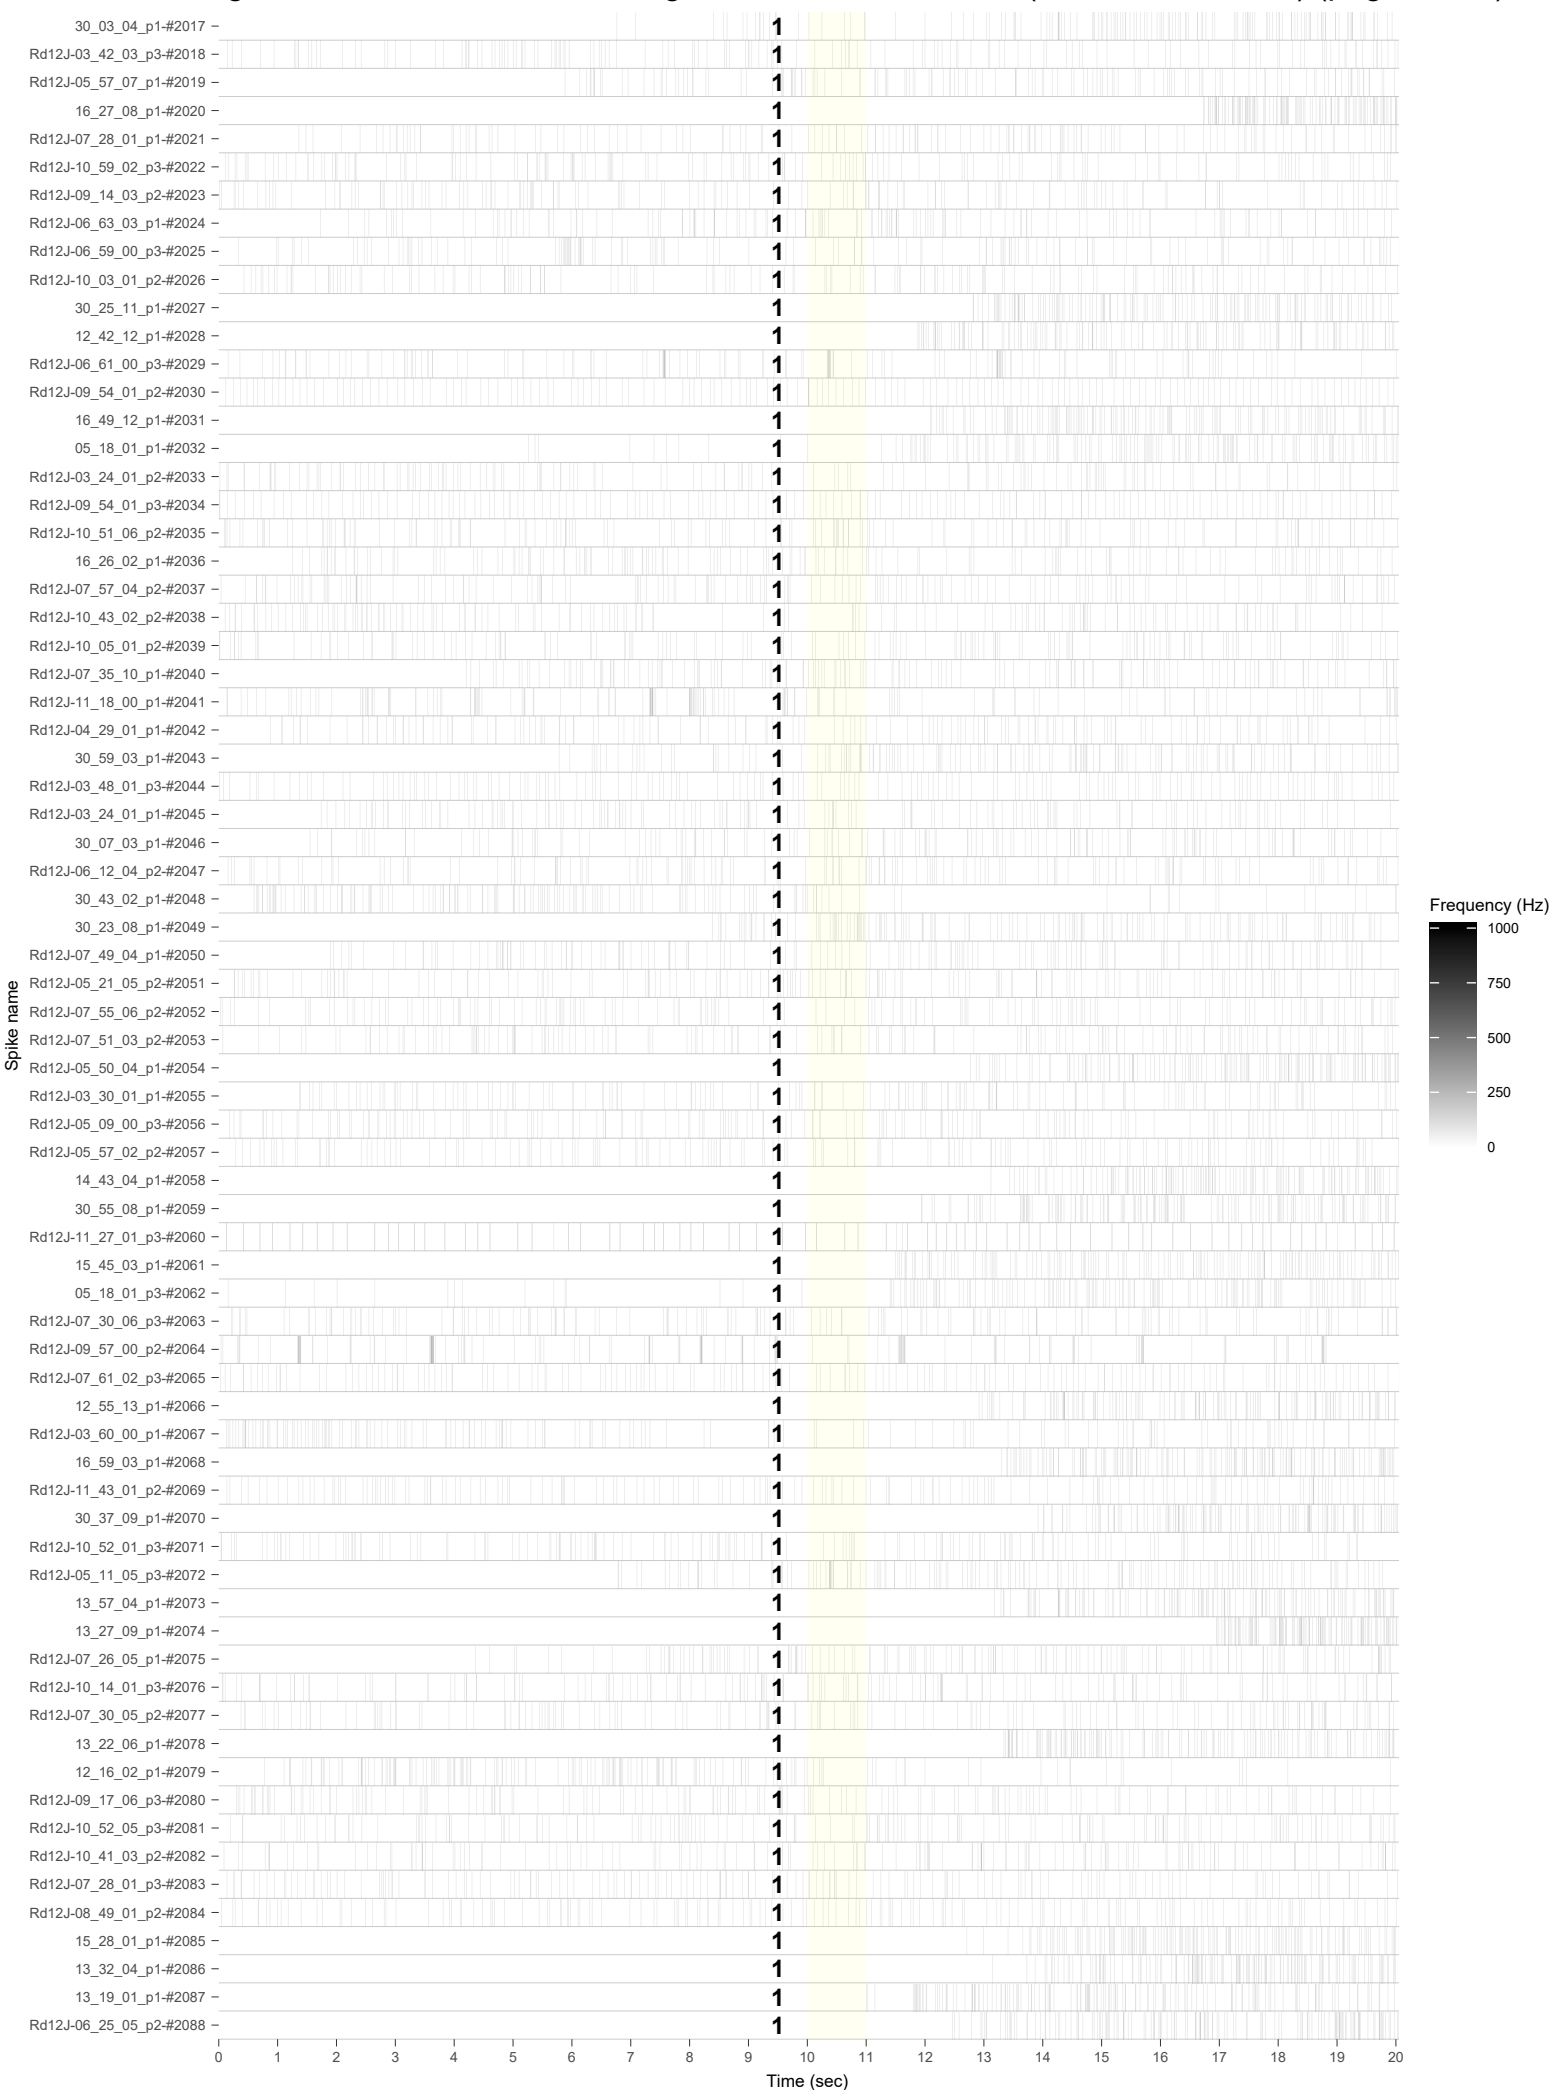

# Teaching dataset: Automatic clustering + Mandai modification (20160623125739) (page 30/54)

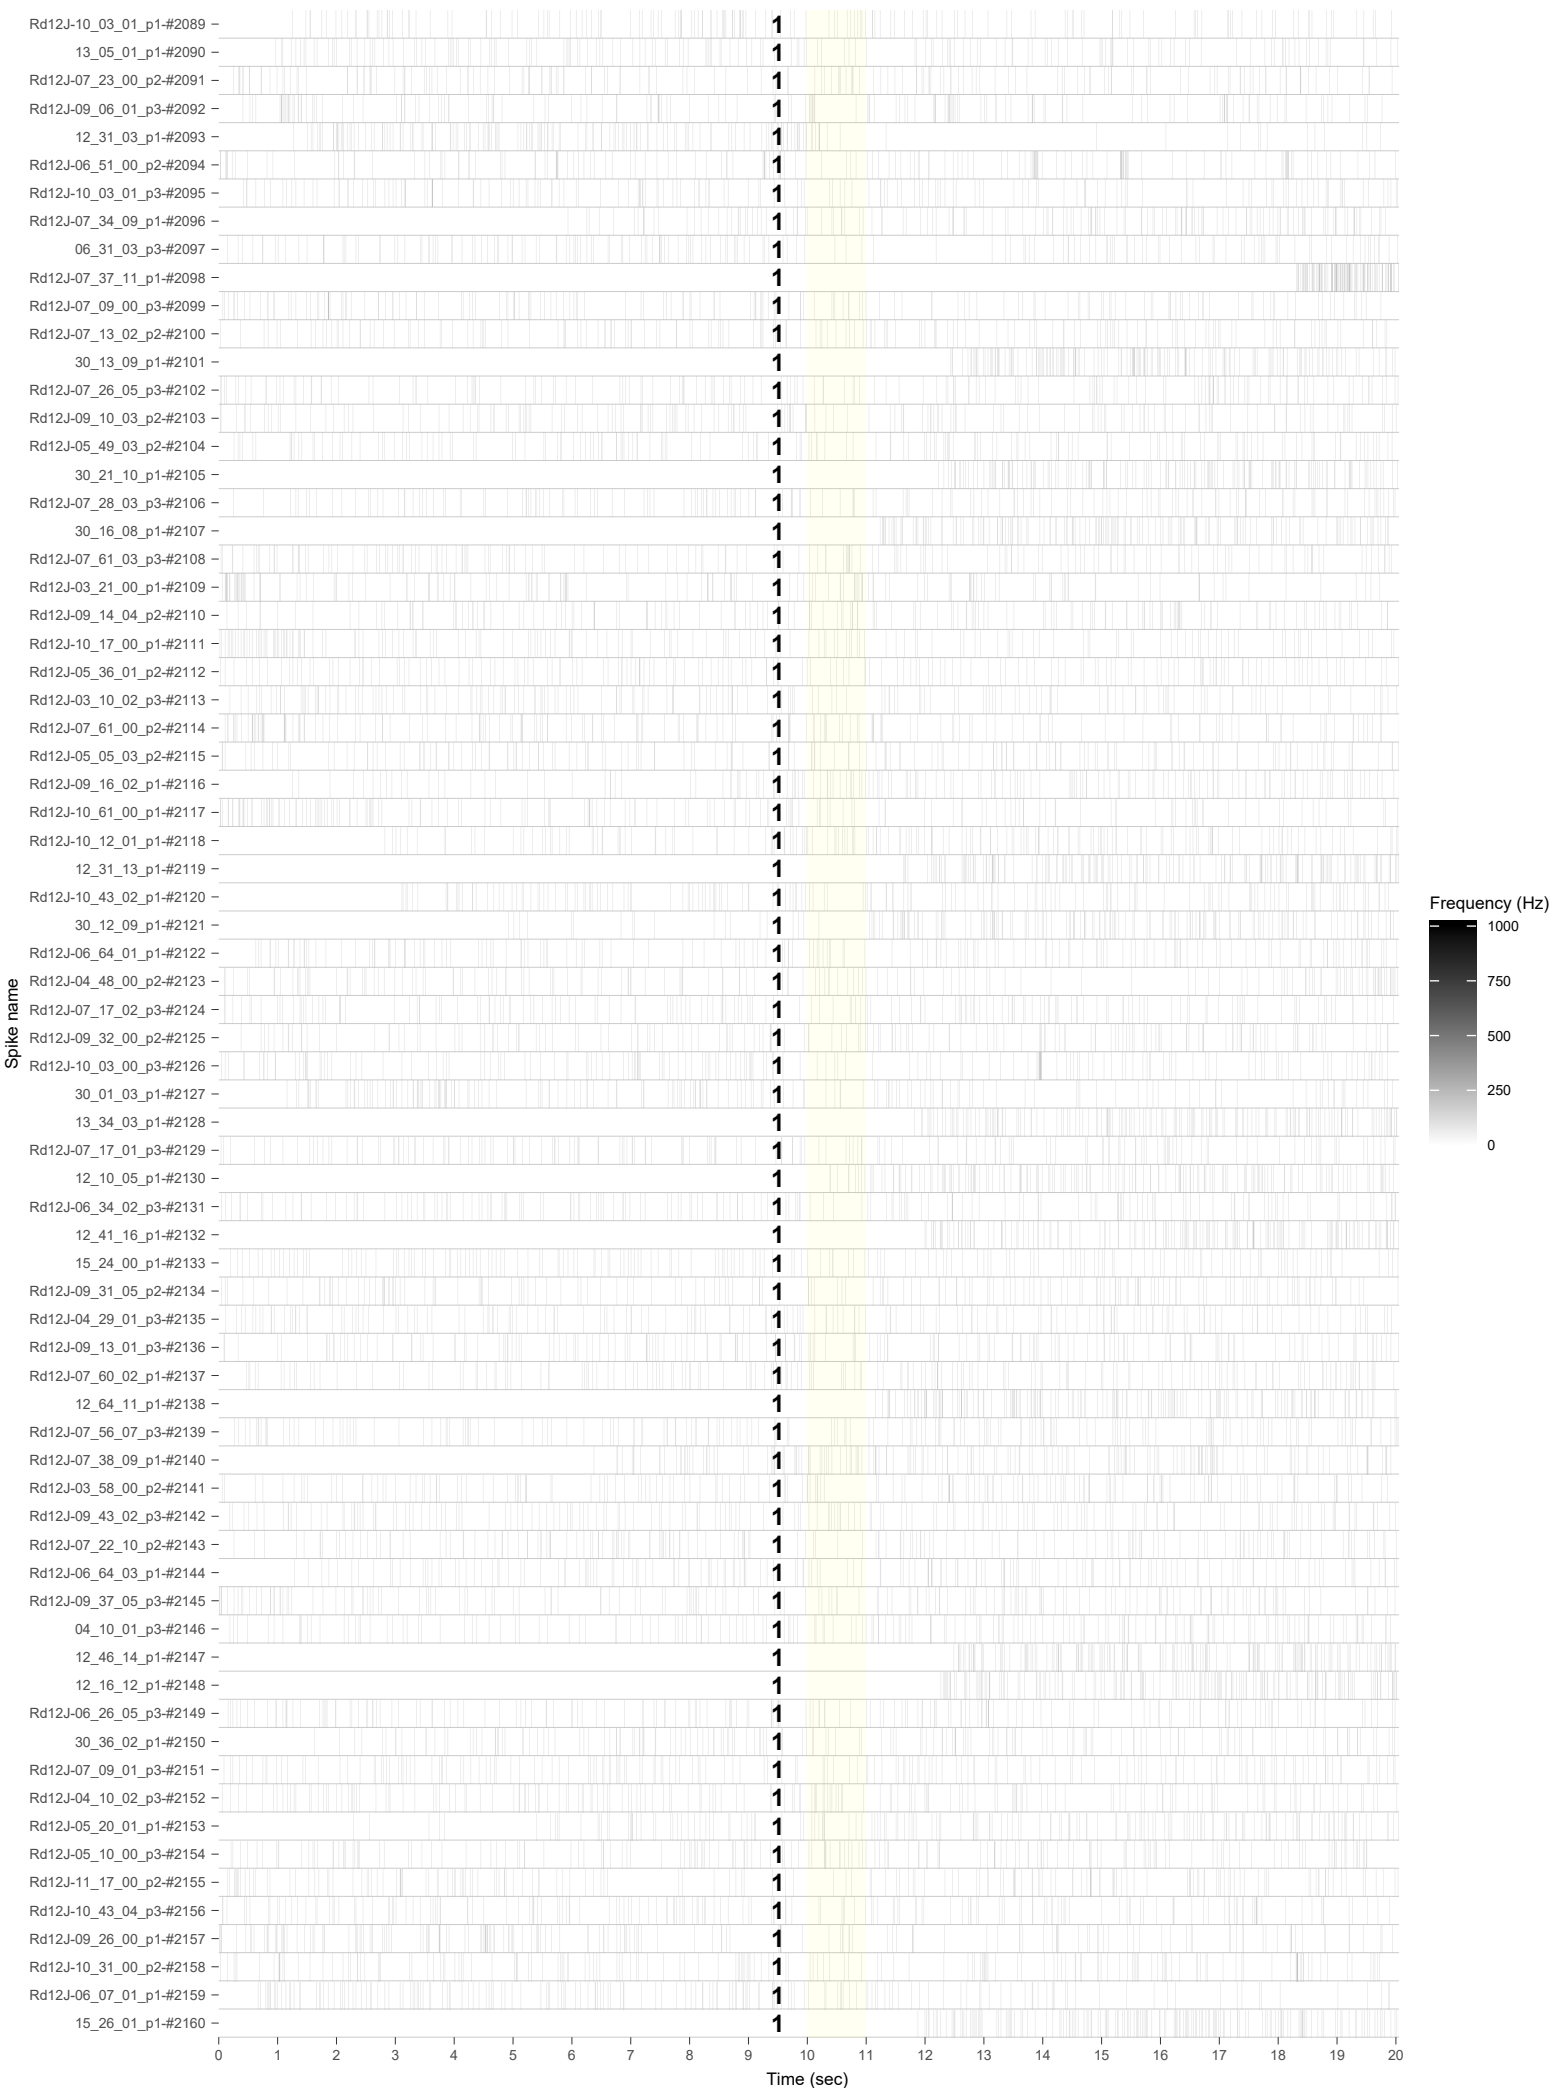

# Teaching dataset: Automatic clustering + Mandai modification (20160623125739) (page 31/54)

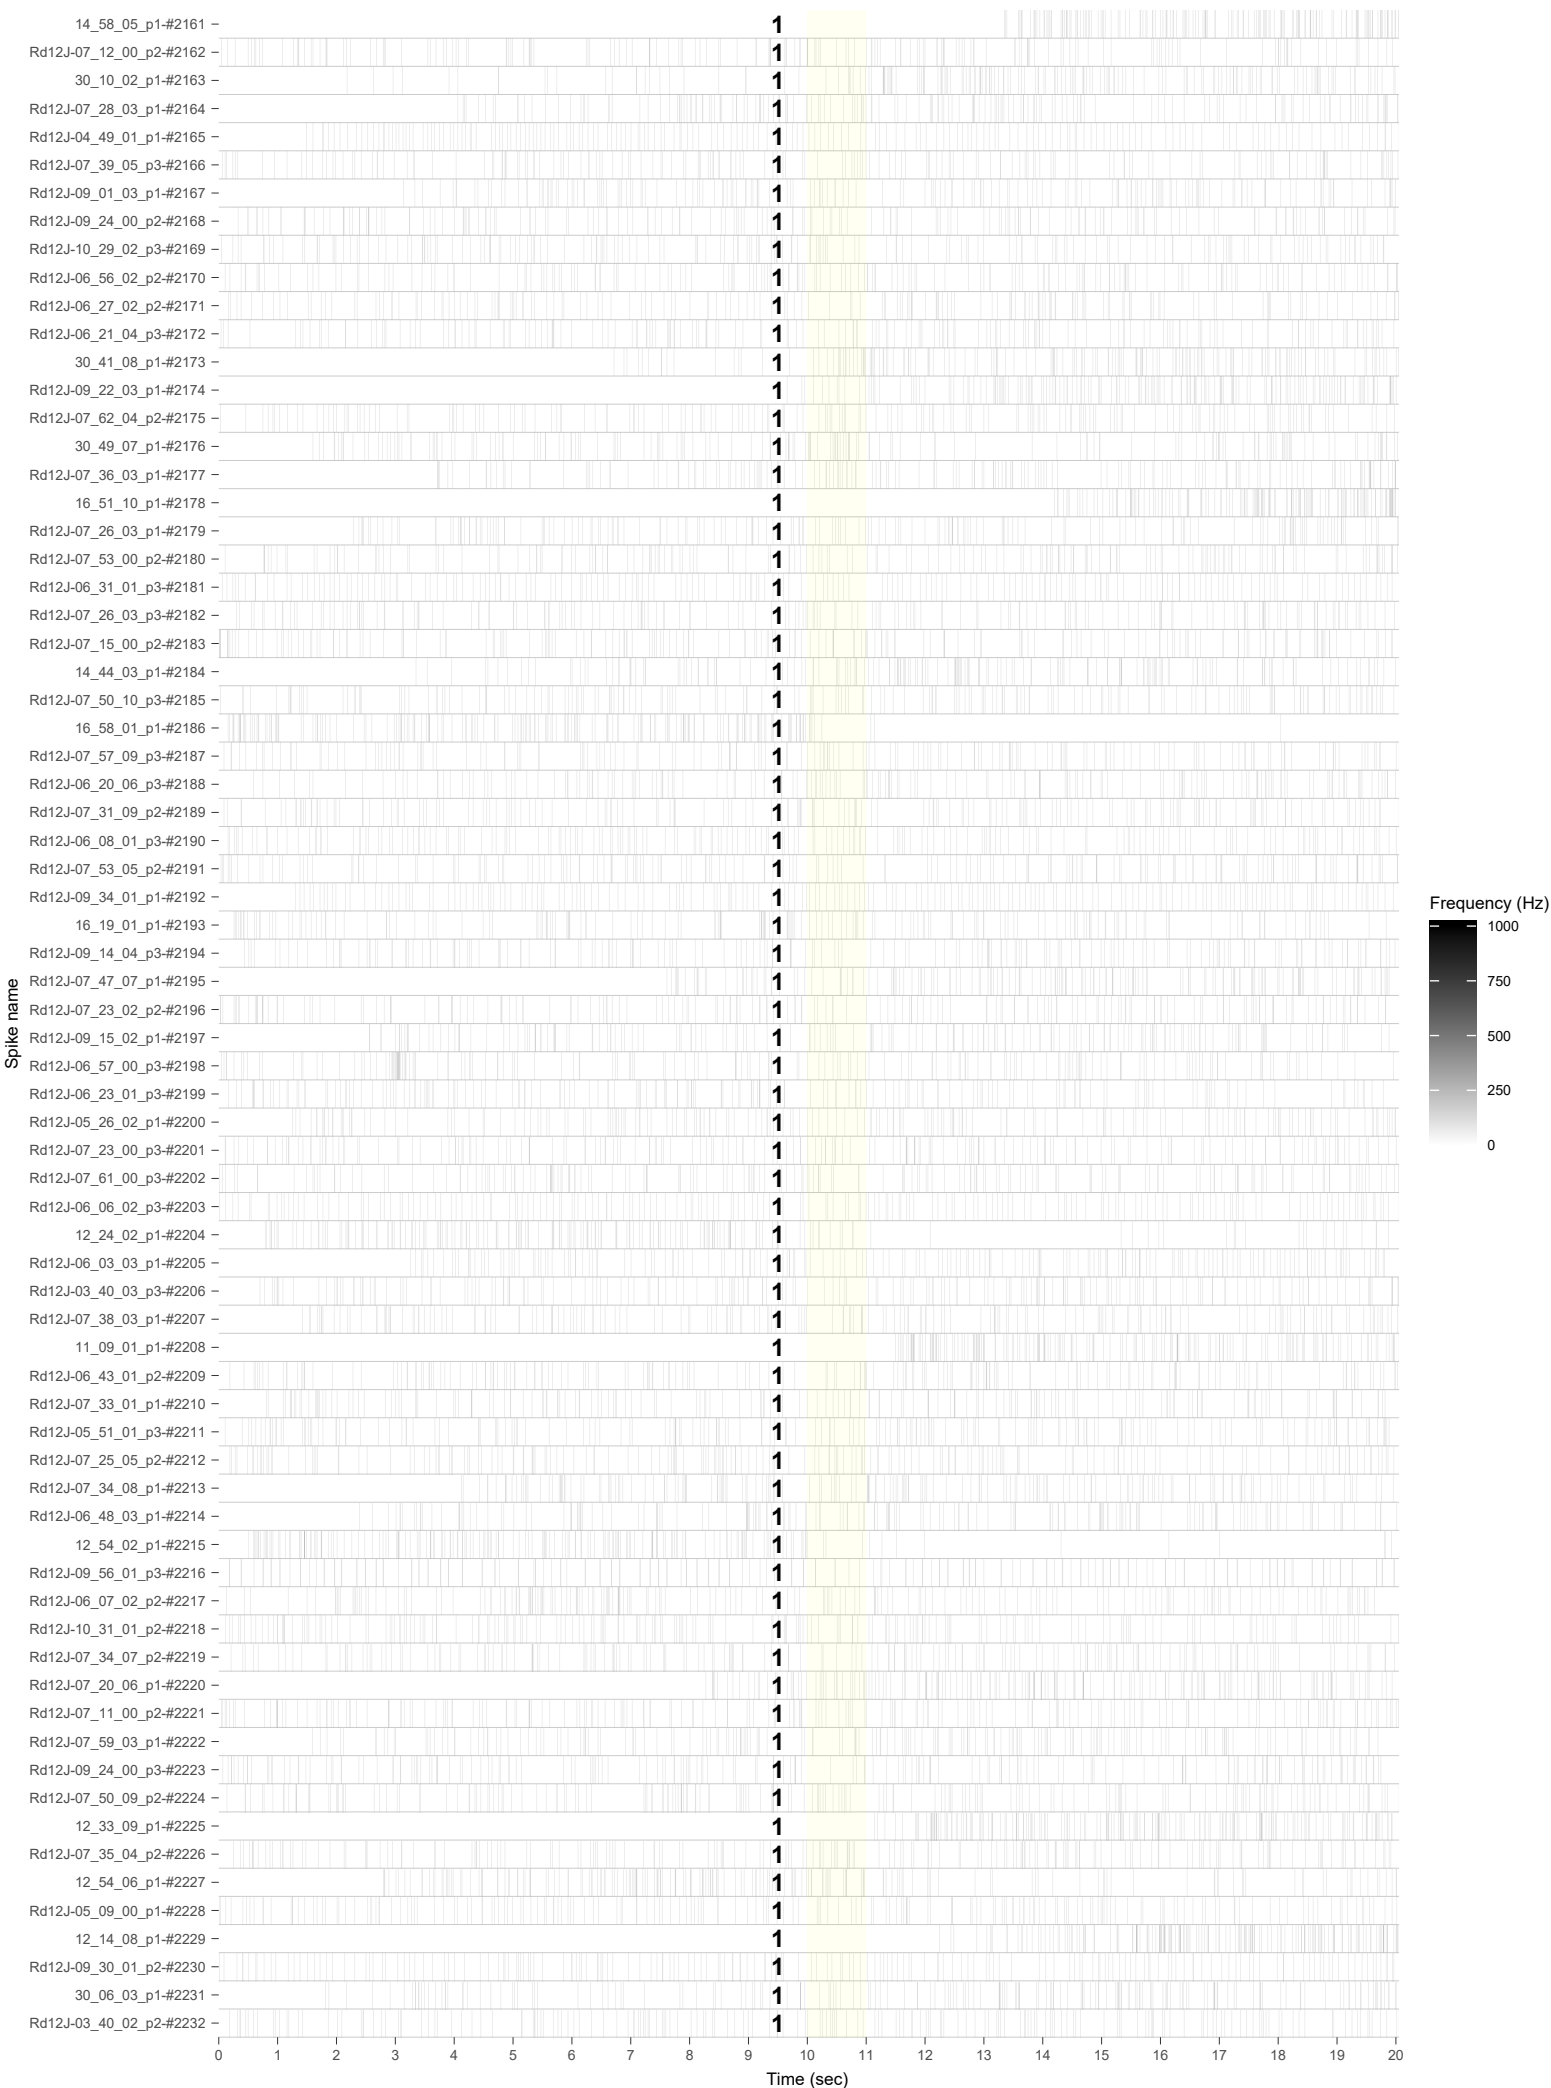

# Teaching dataset: Automatic clustering + Mandai modification (20160623125739) (page 32/54)

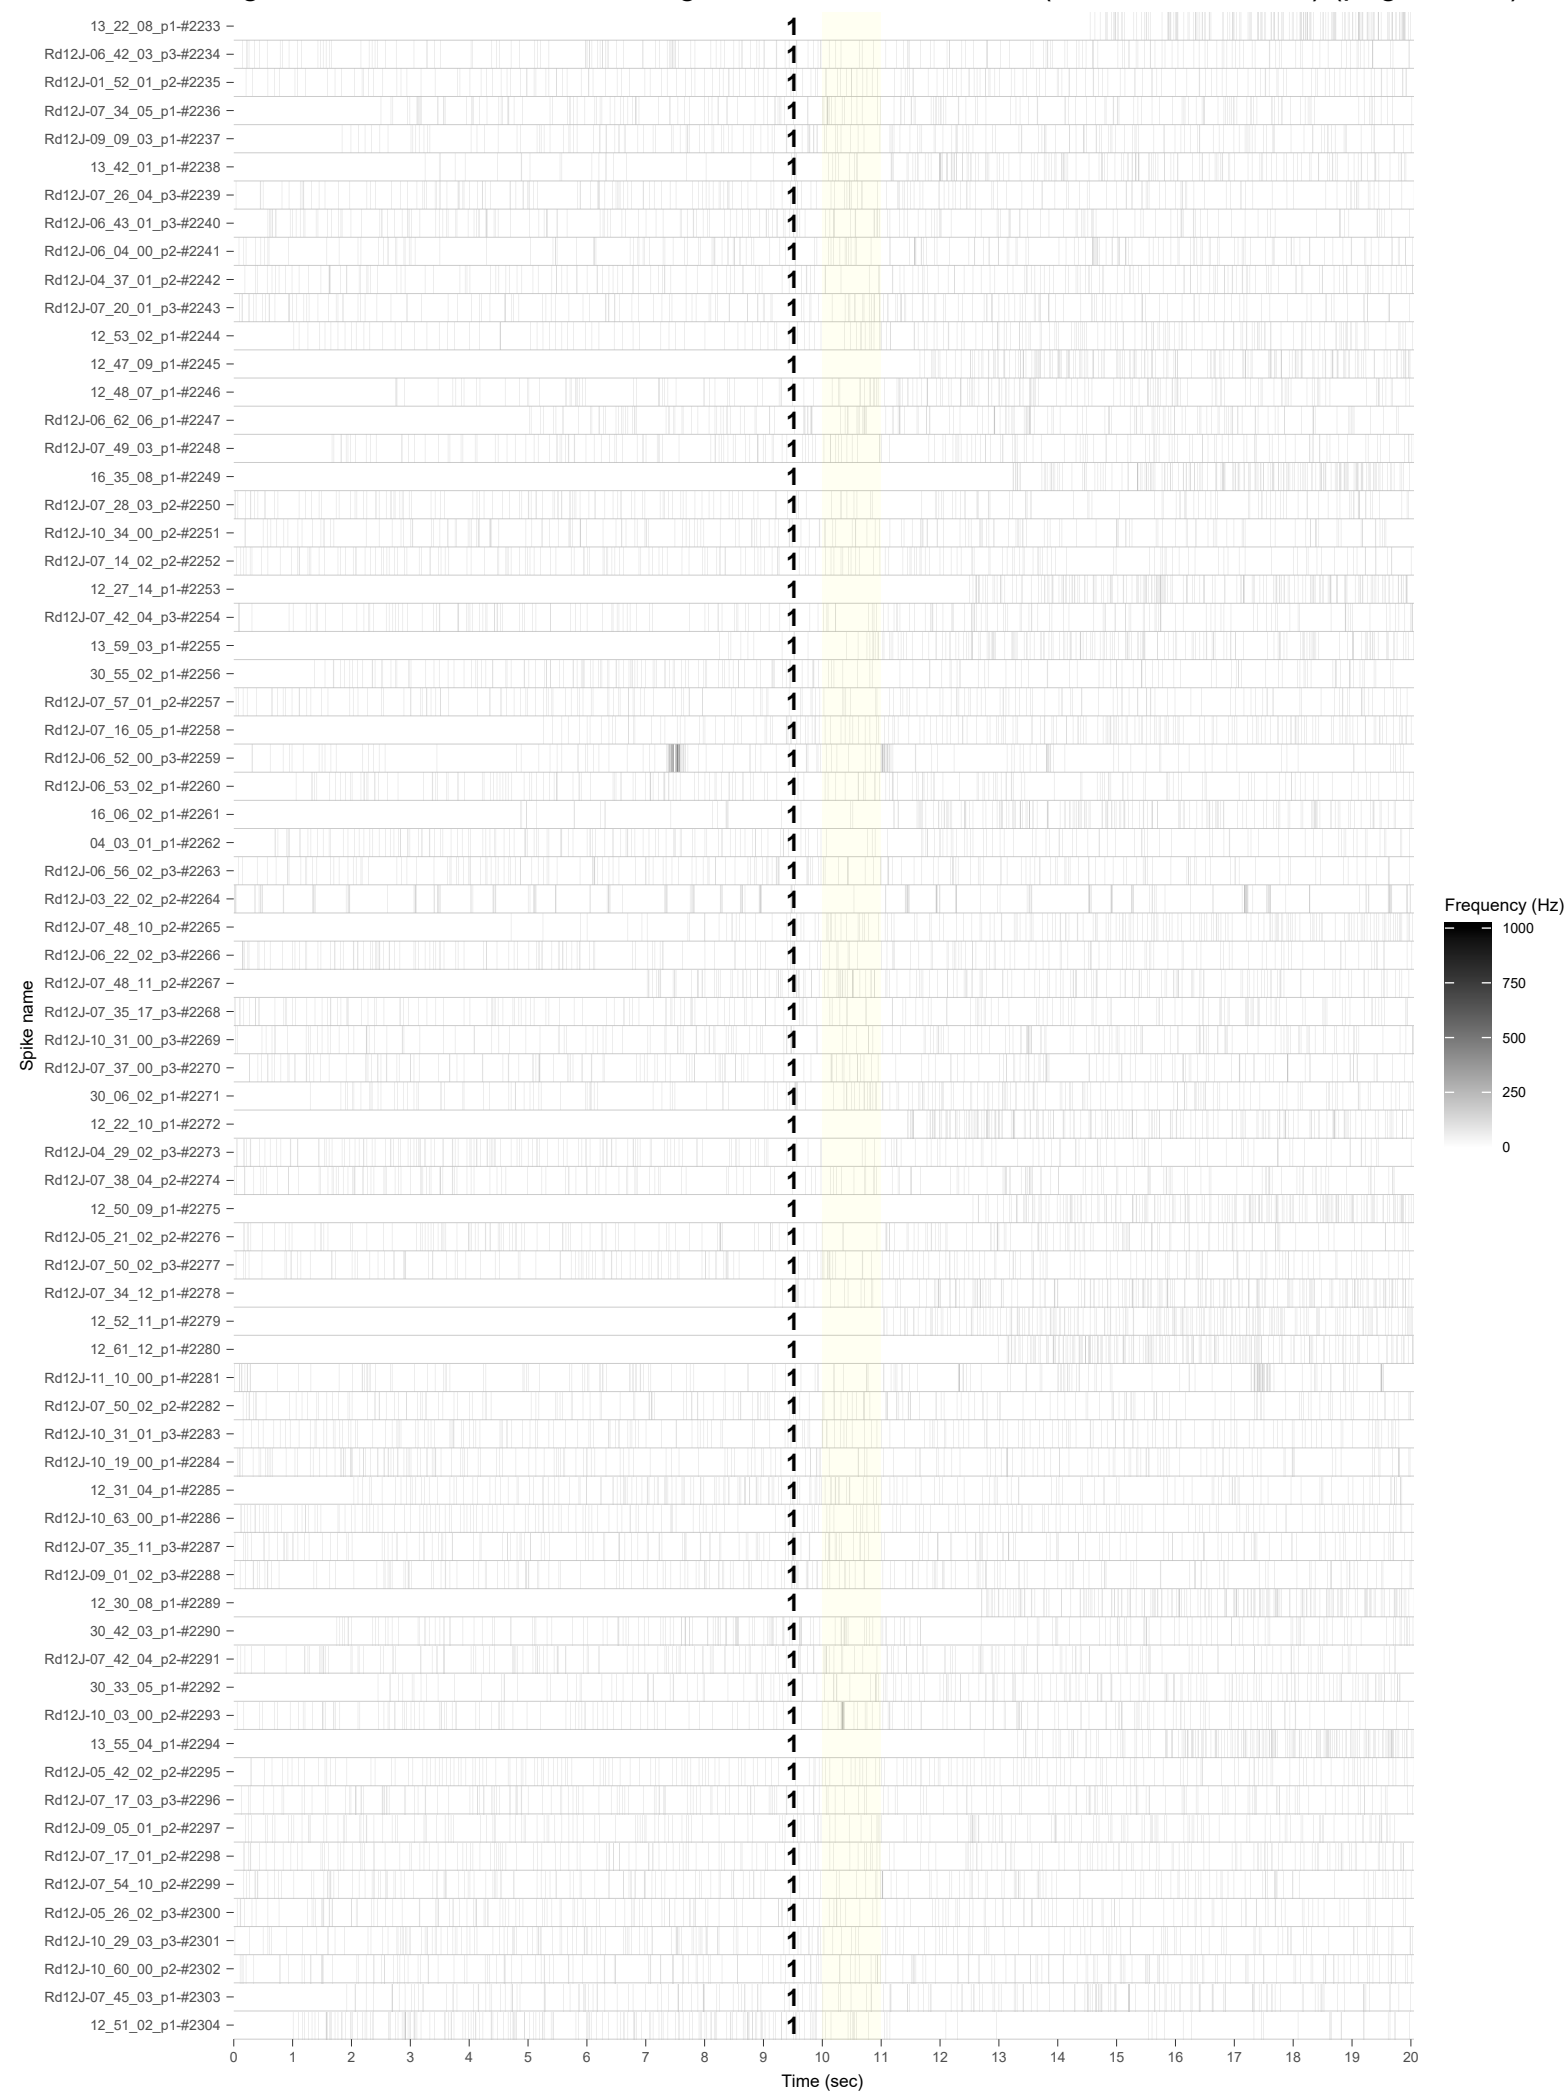



# Teaching dataset: Automatic clustering + Mandai modification (20160623125739) (page 33/54)

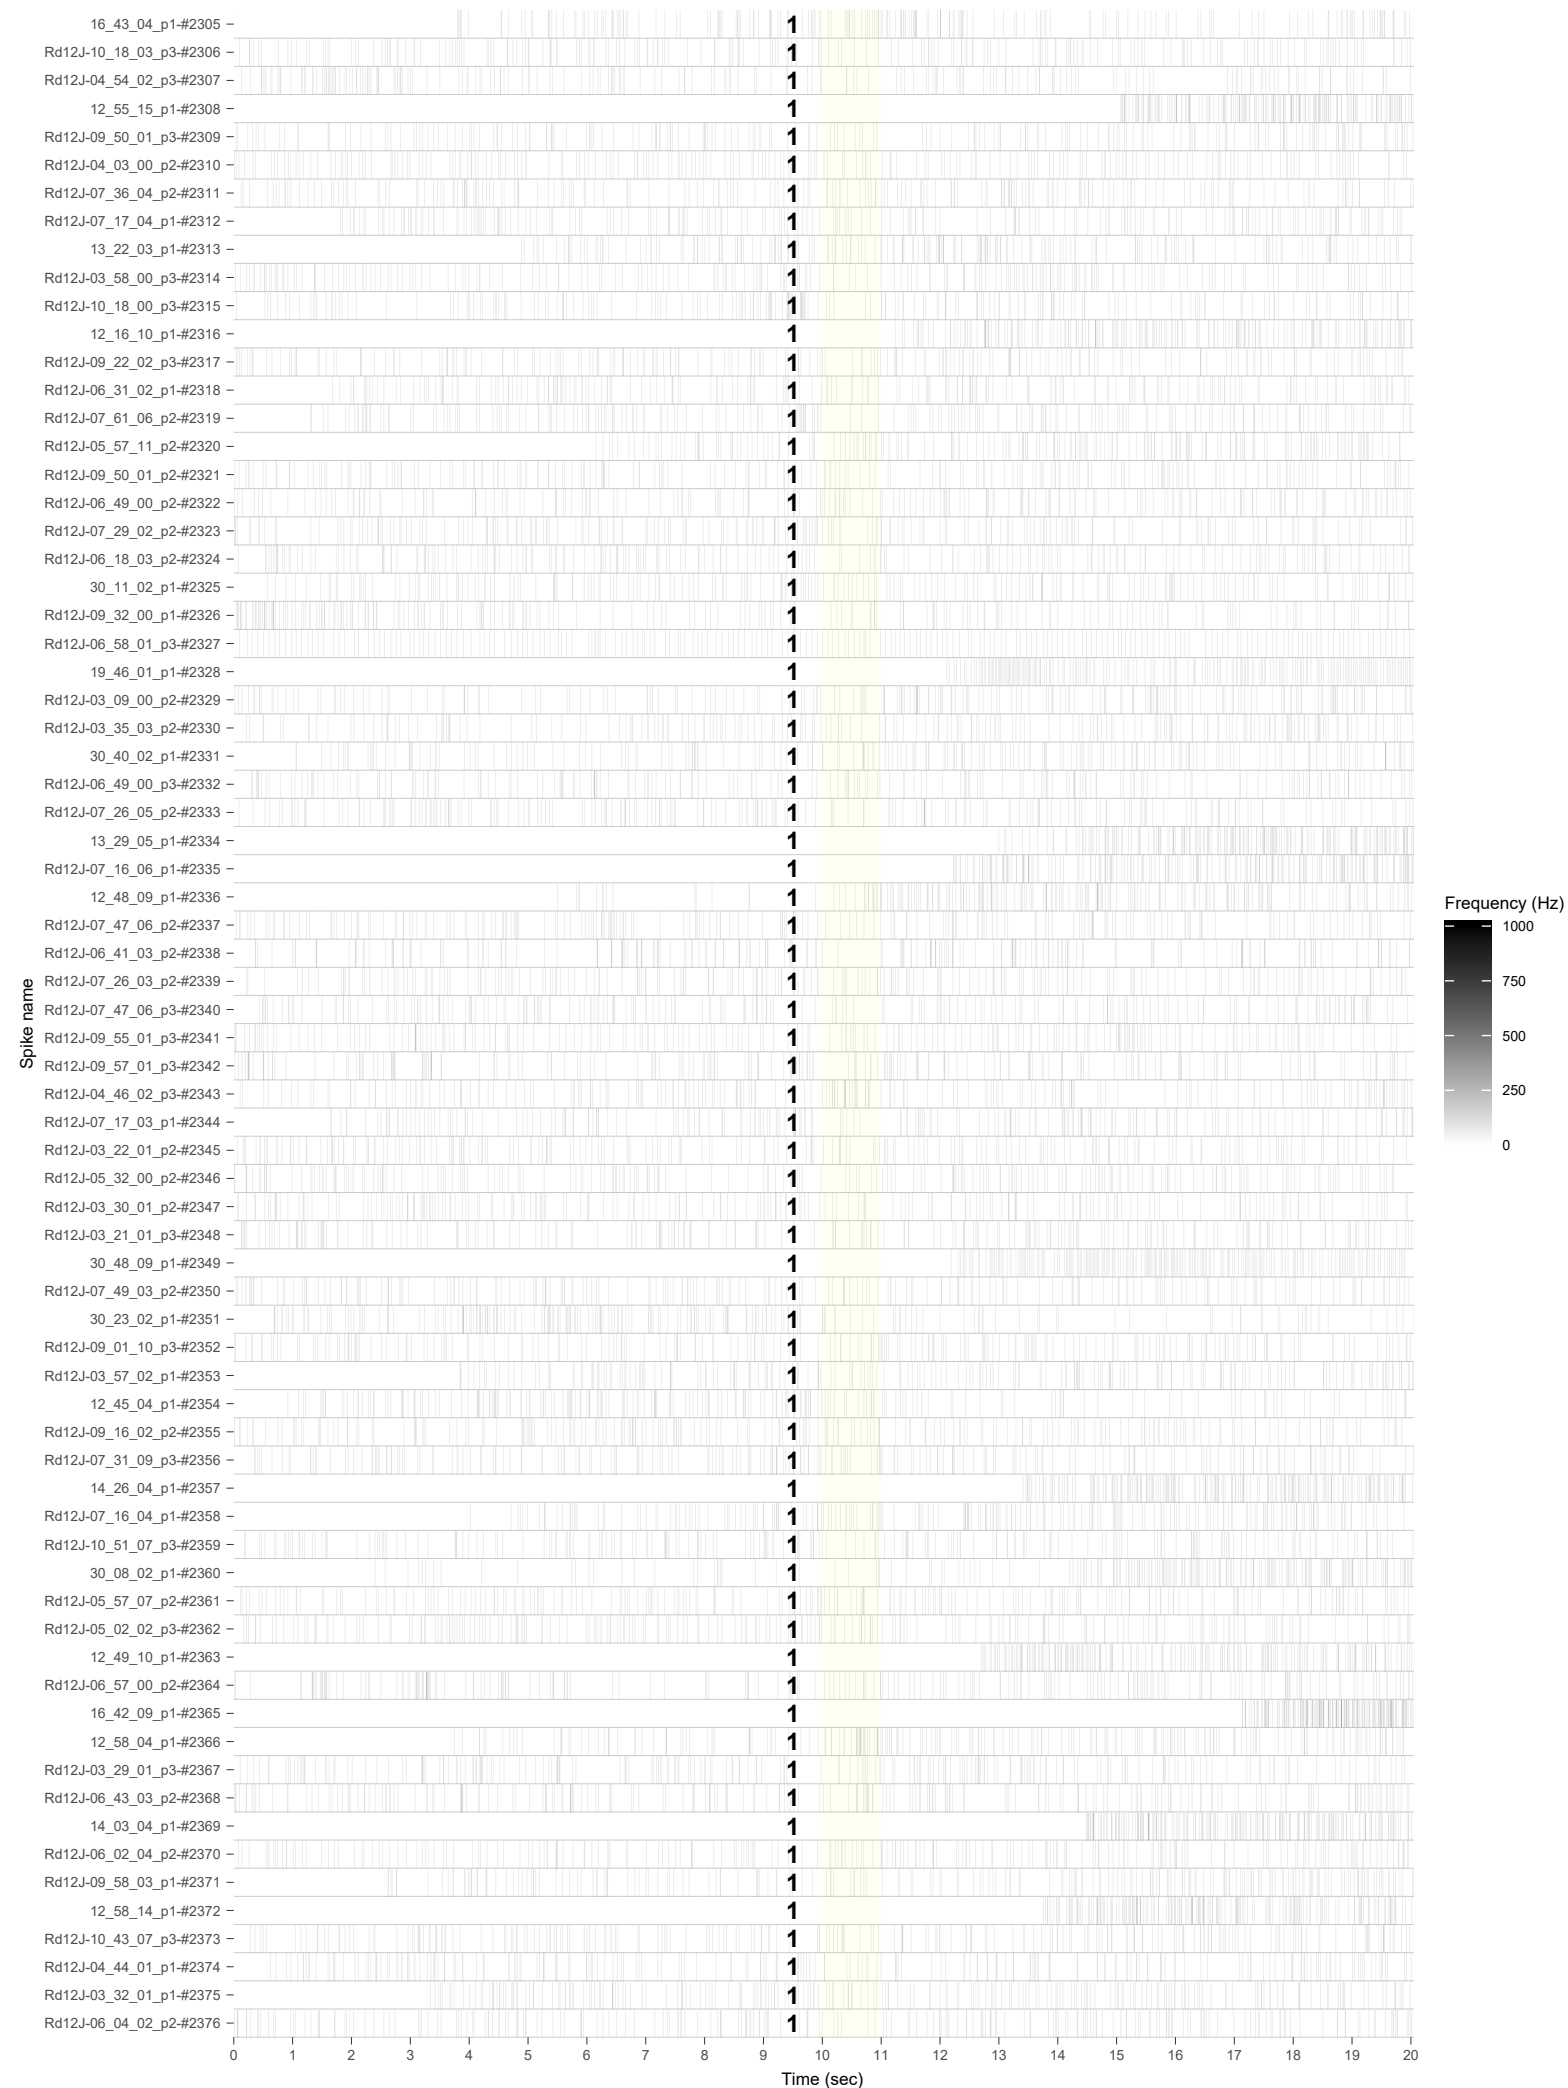

# Teaching dataset: Automatic clustering + Mandai modification (20160623125739) (page 34/54)

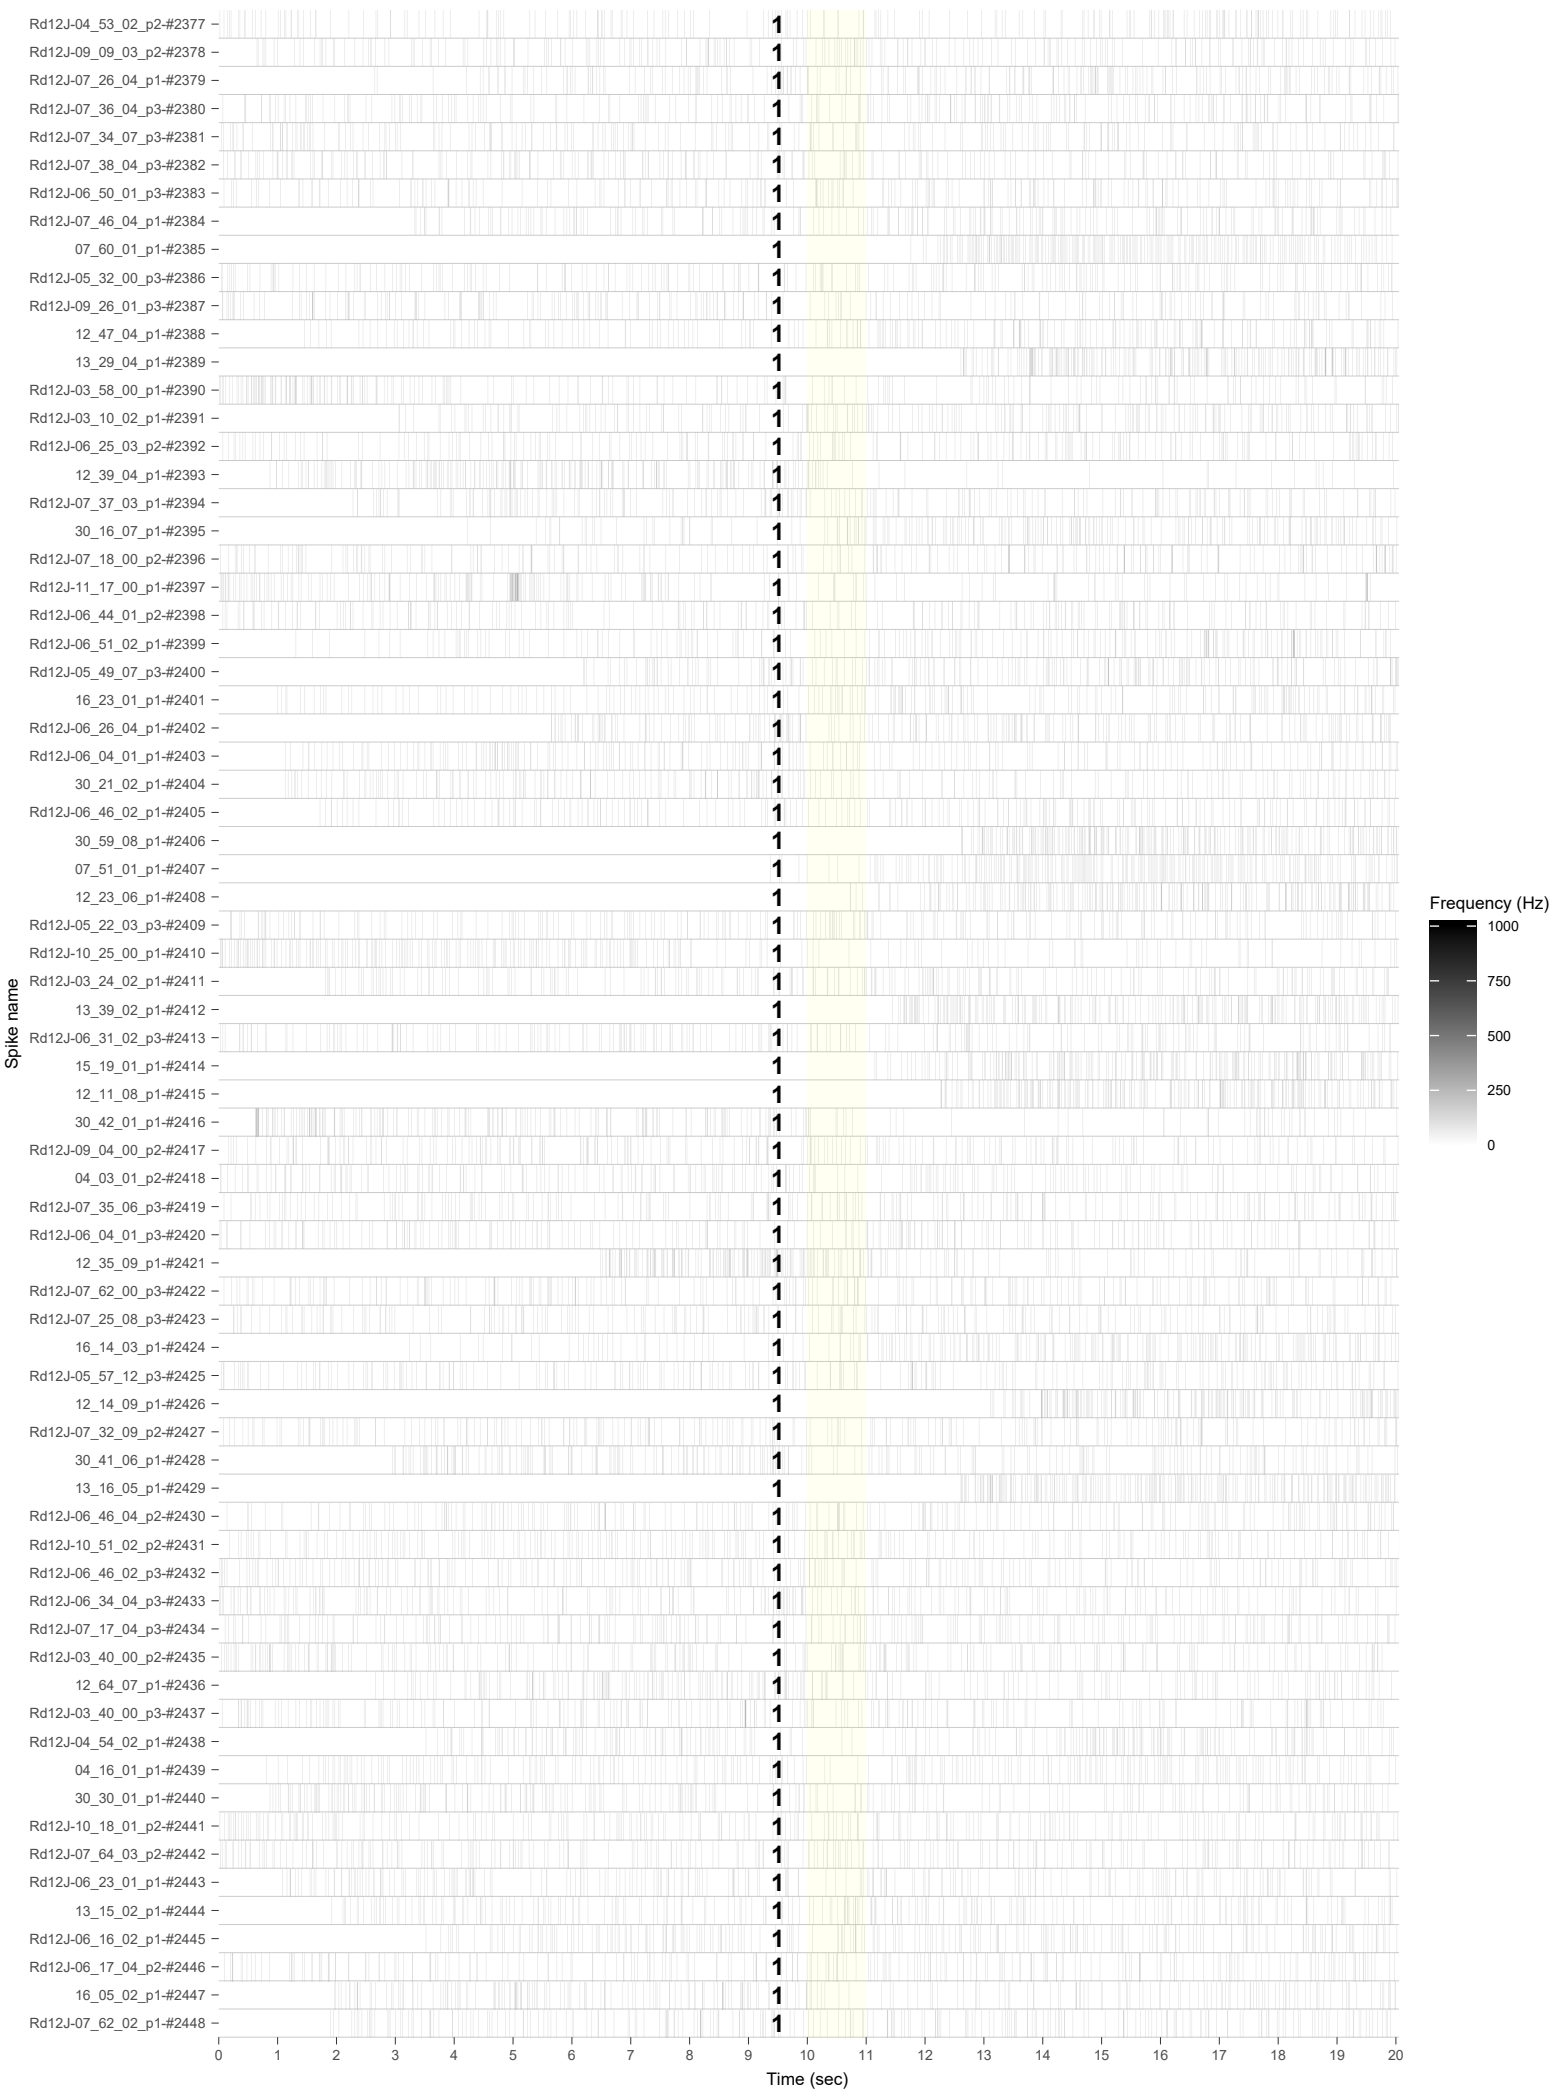

# Teaching dataset: Automatic clustering + Mandai modification (20160623125739) (page 35/54)

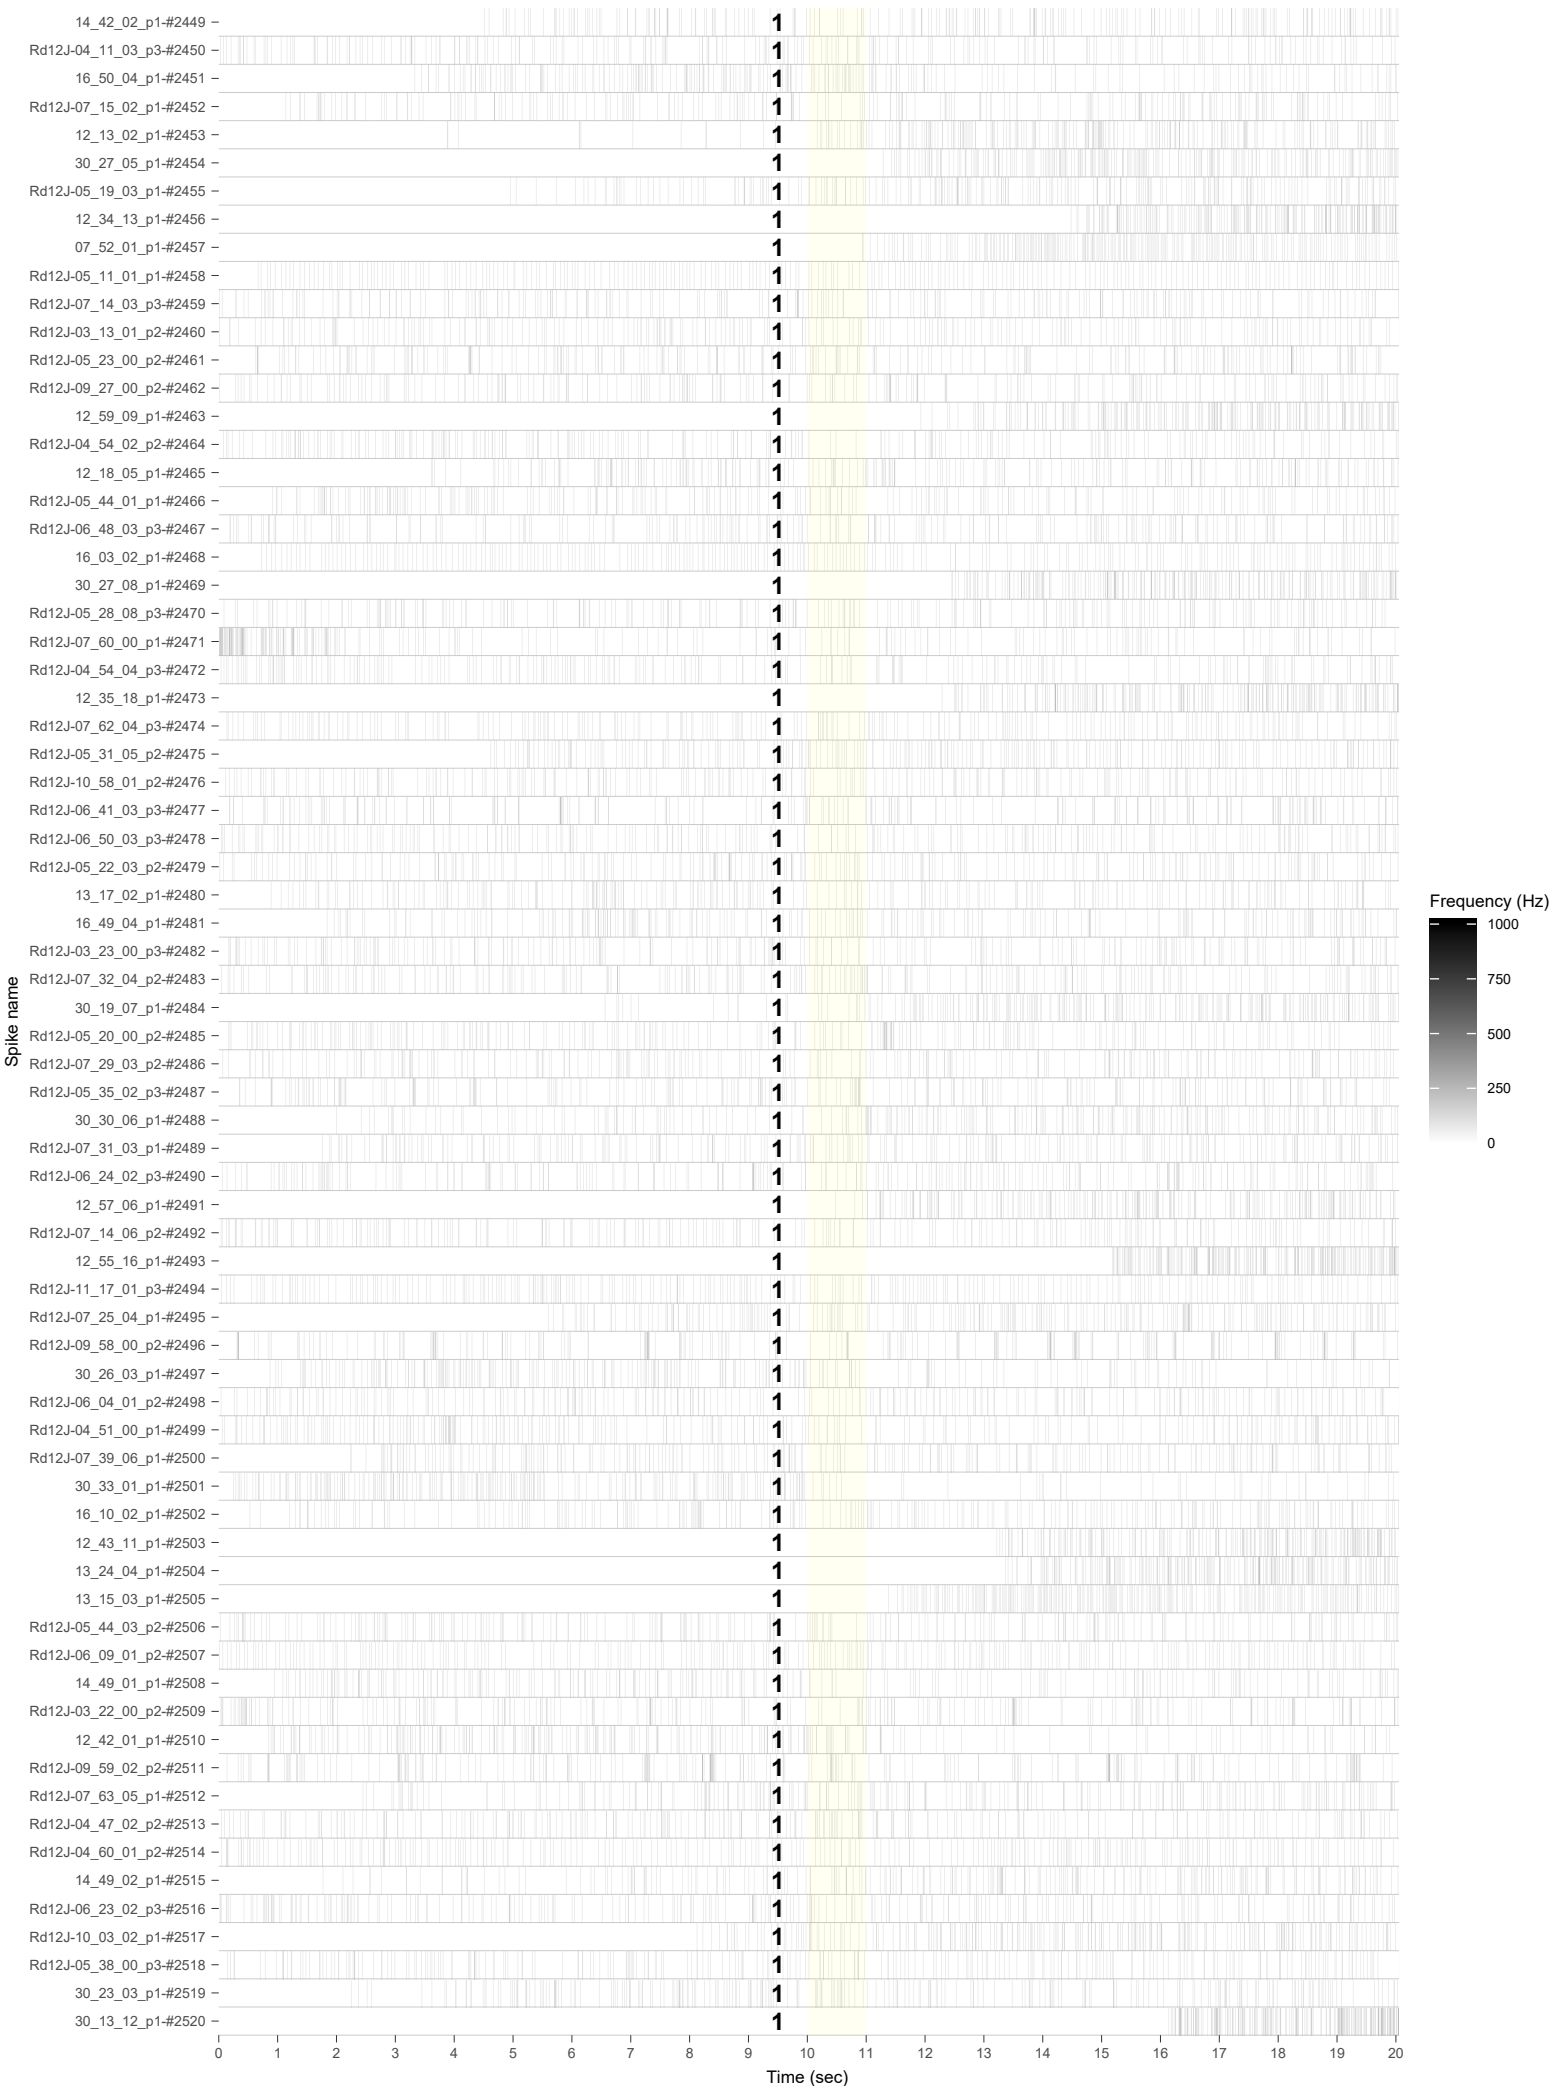

# Teaching dataset: Automatic clustering + Mandai modification (20160623125739) (page 36/54)

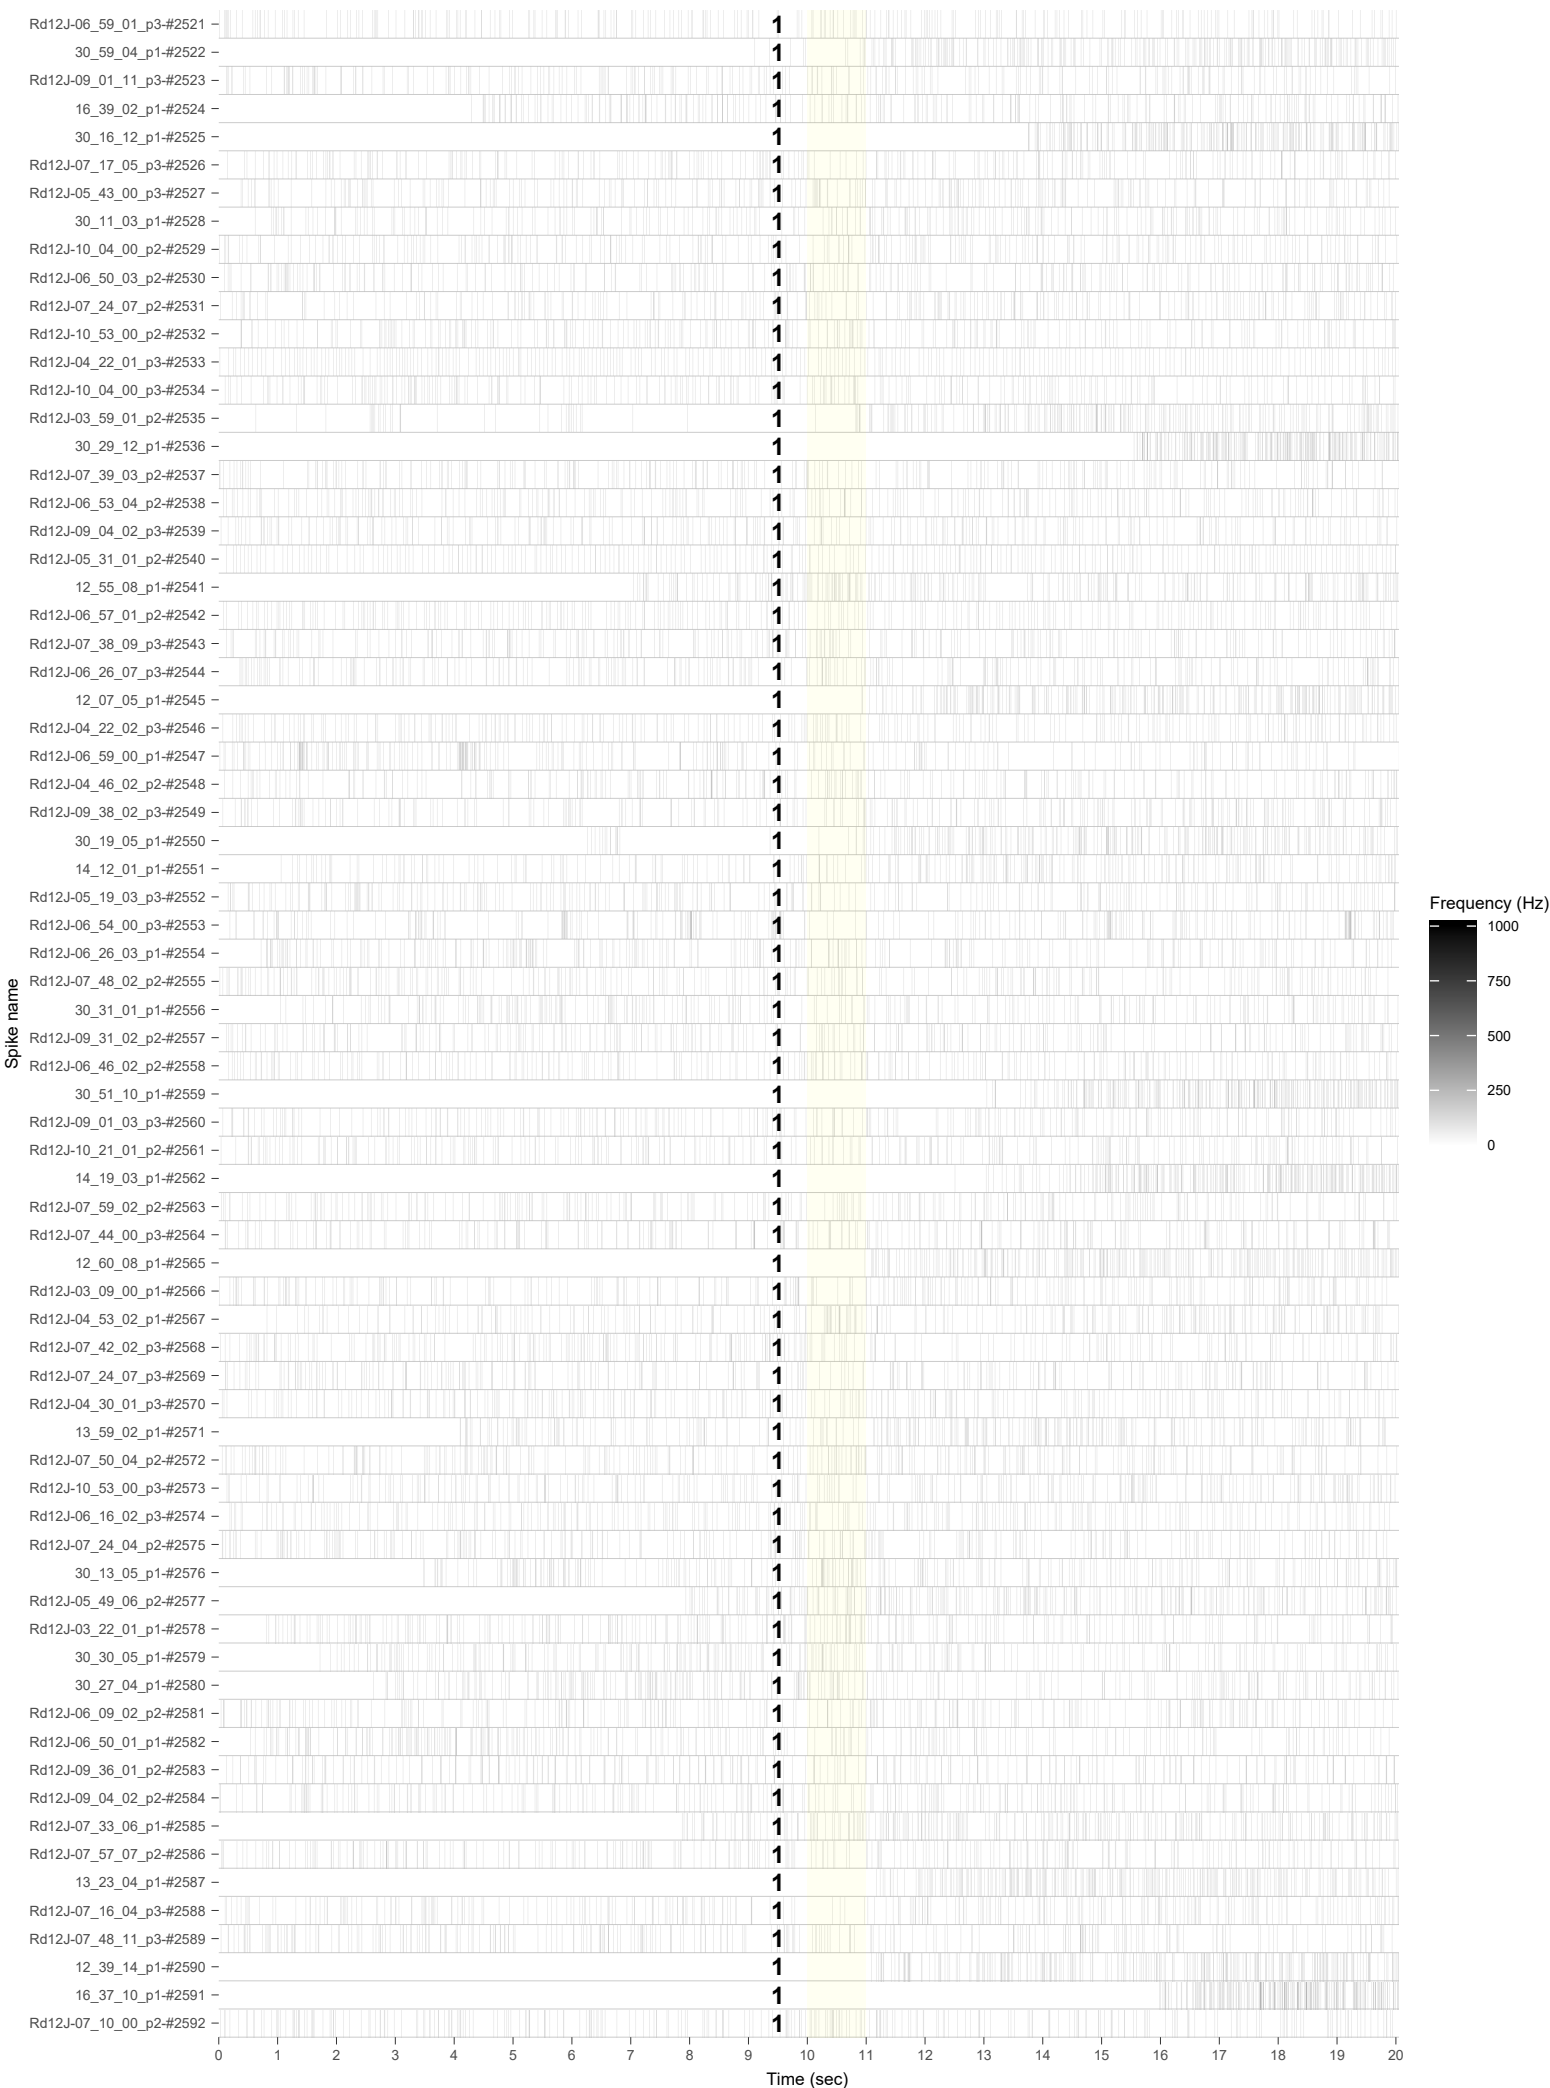

# Teaching dataset: Automatic clustering + Mandai modification (20160623125739) (page 37/54)

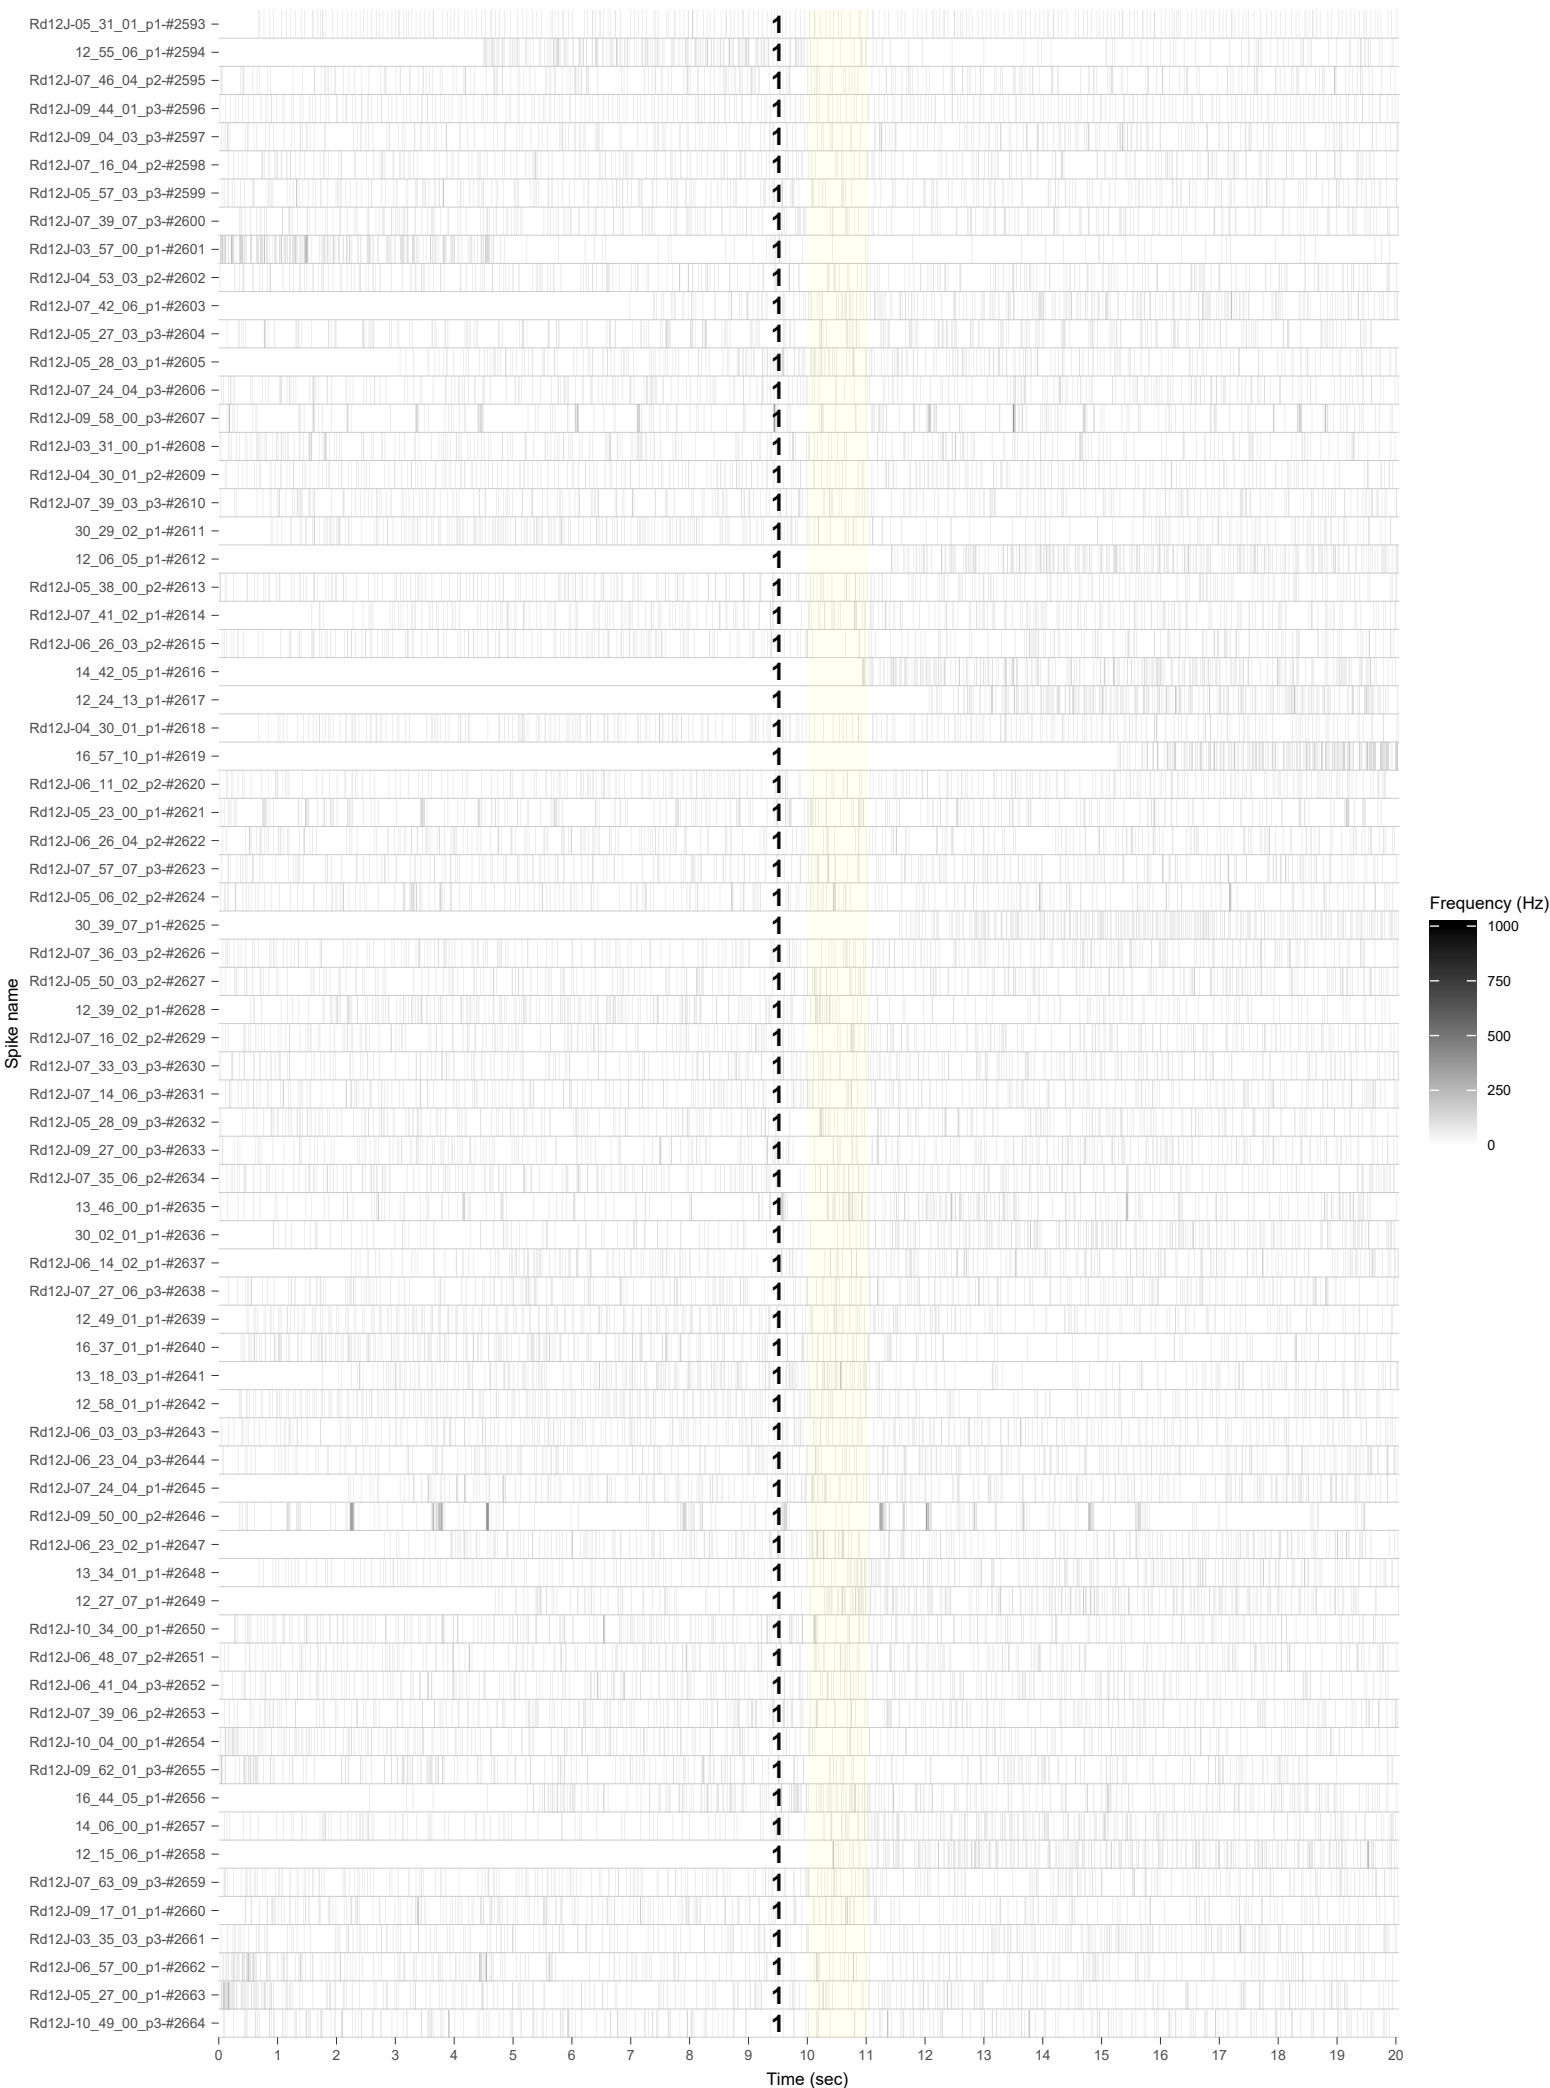

# Teaching dataset: Automatic clustering + Mandai modification (20160623125739) (page 38/54)

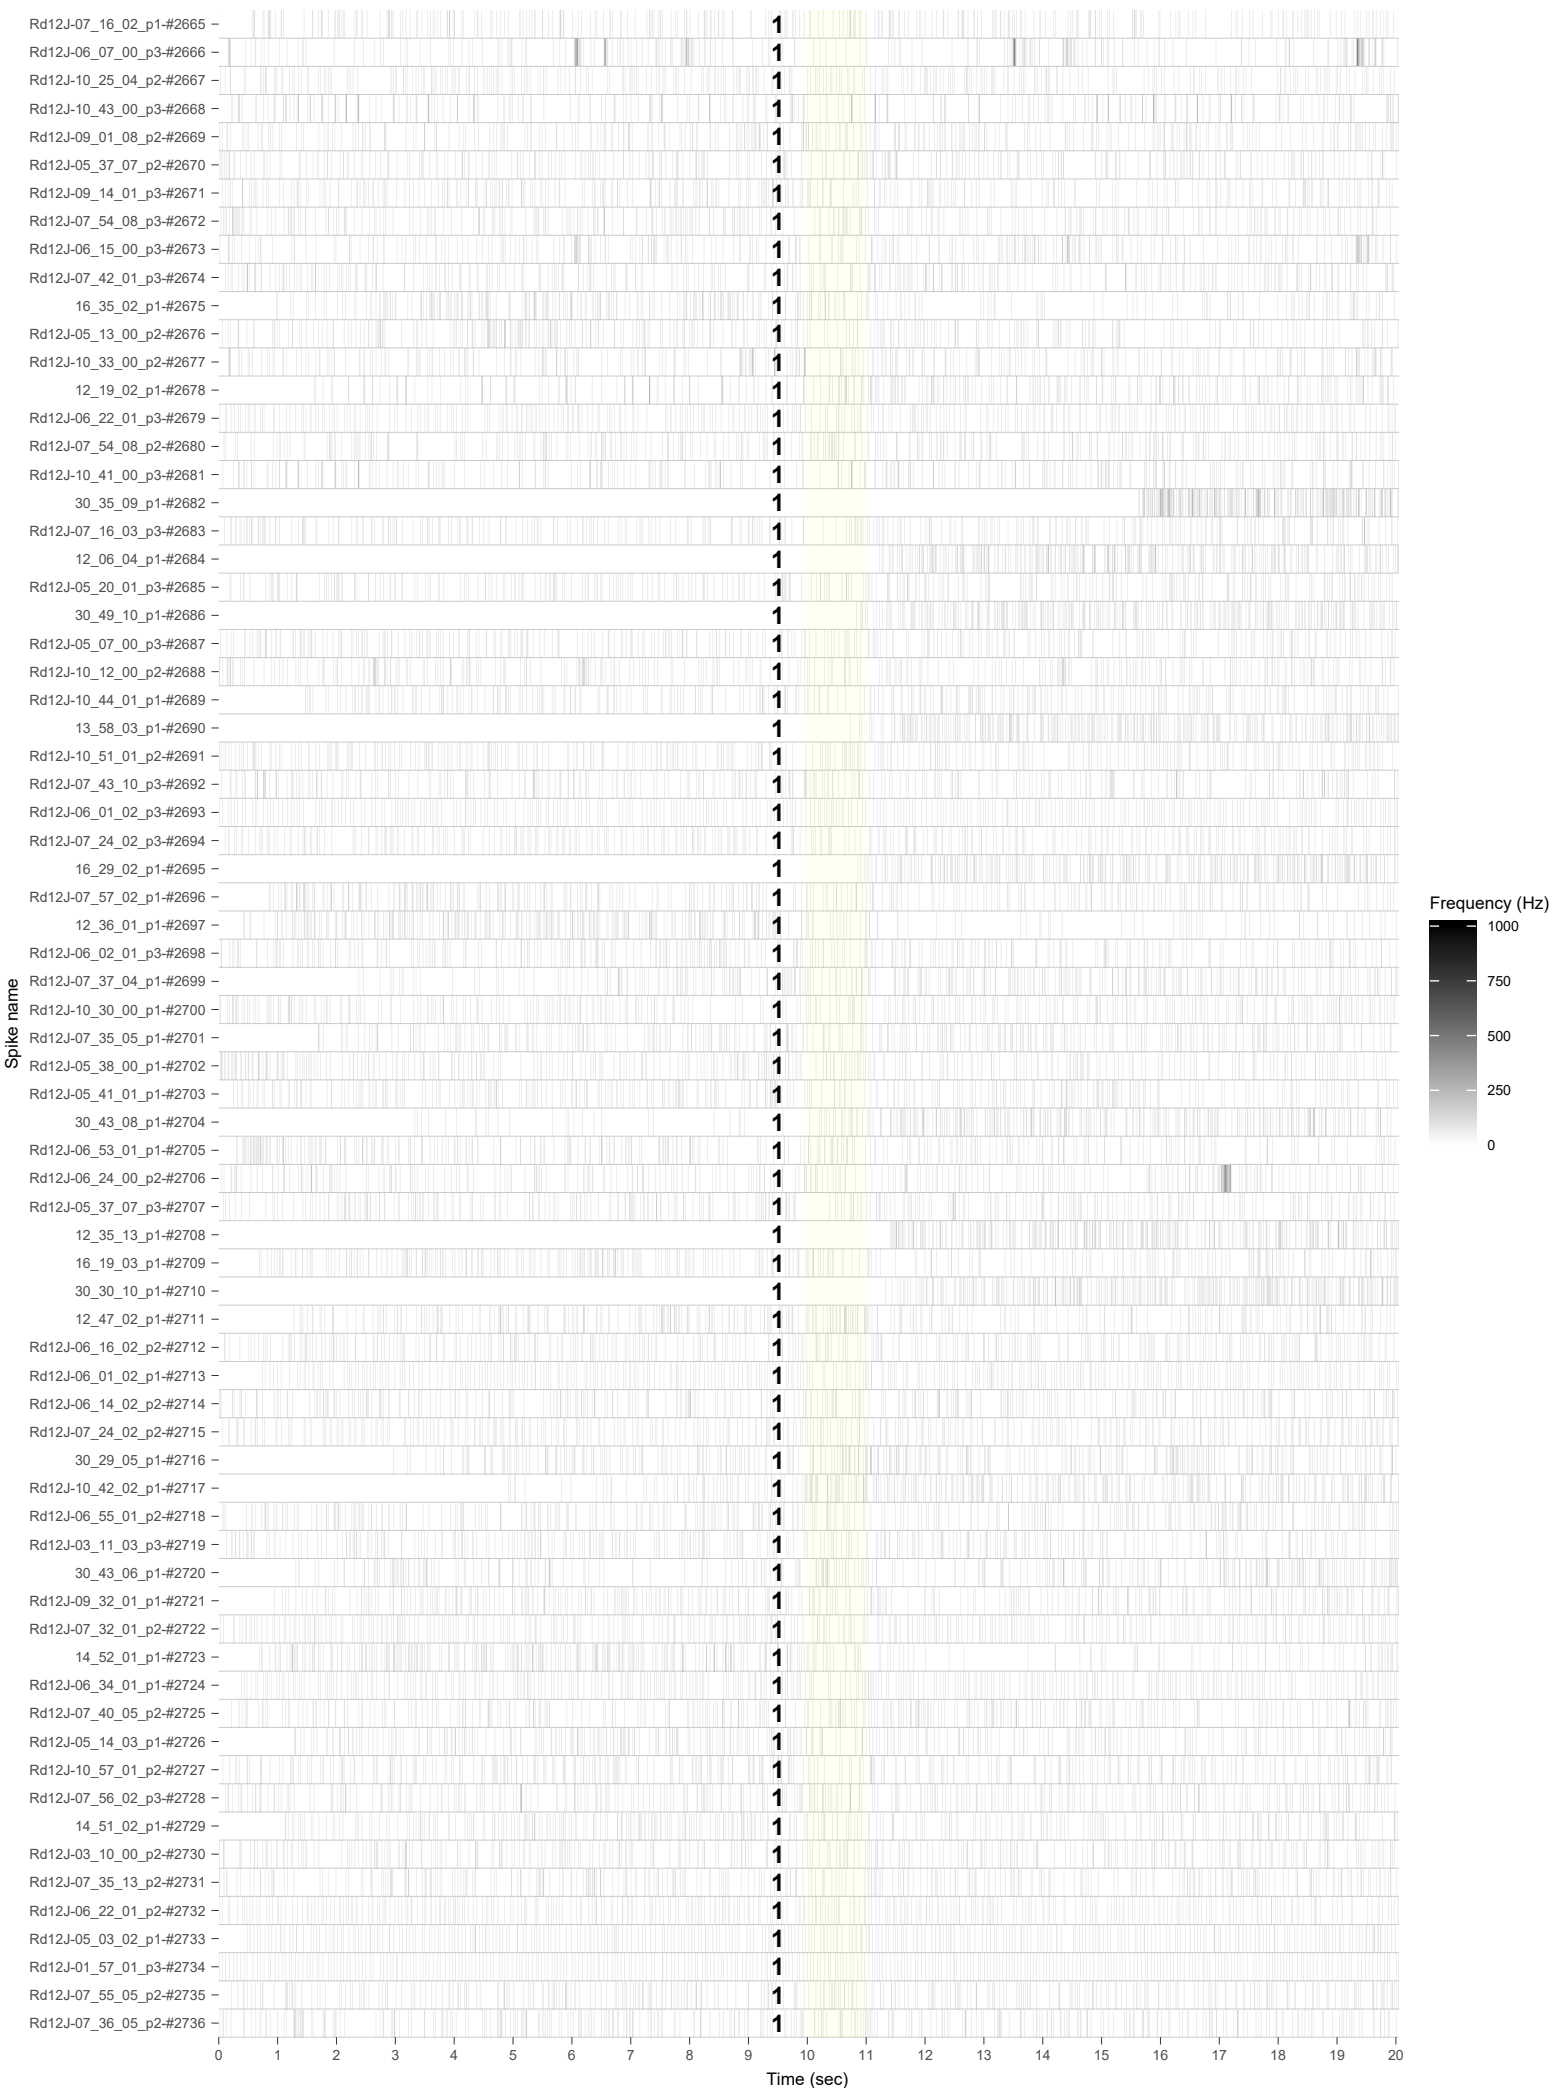

# Teaching dataset: Automatic clustering + Mandai modification (20160623125739) (page 39/54)

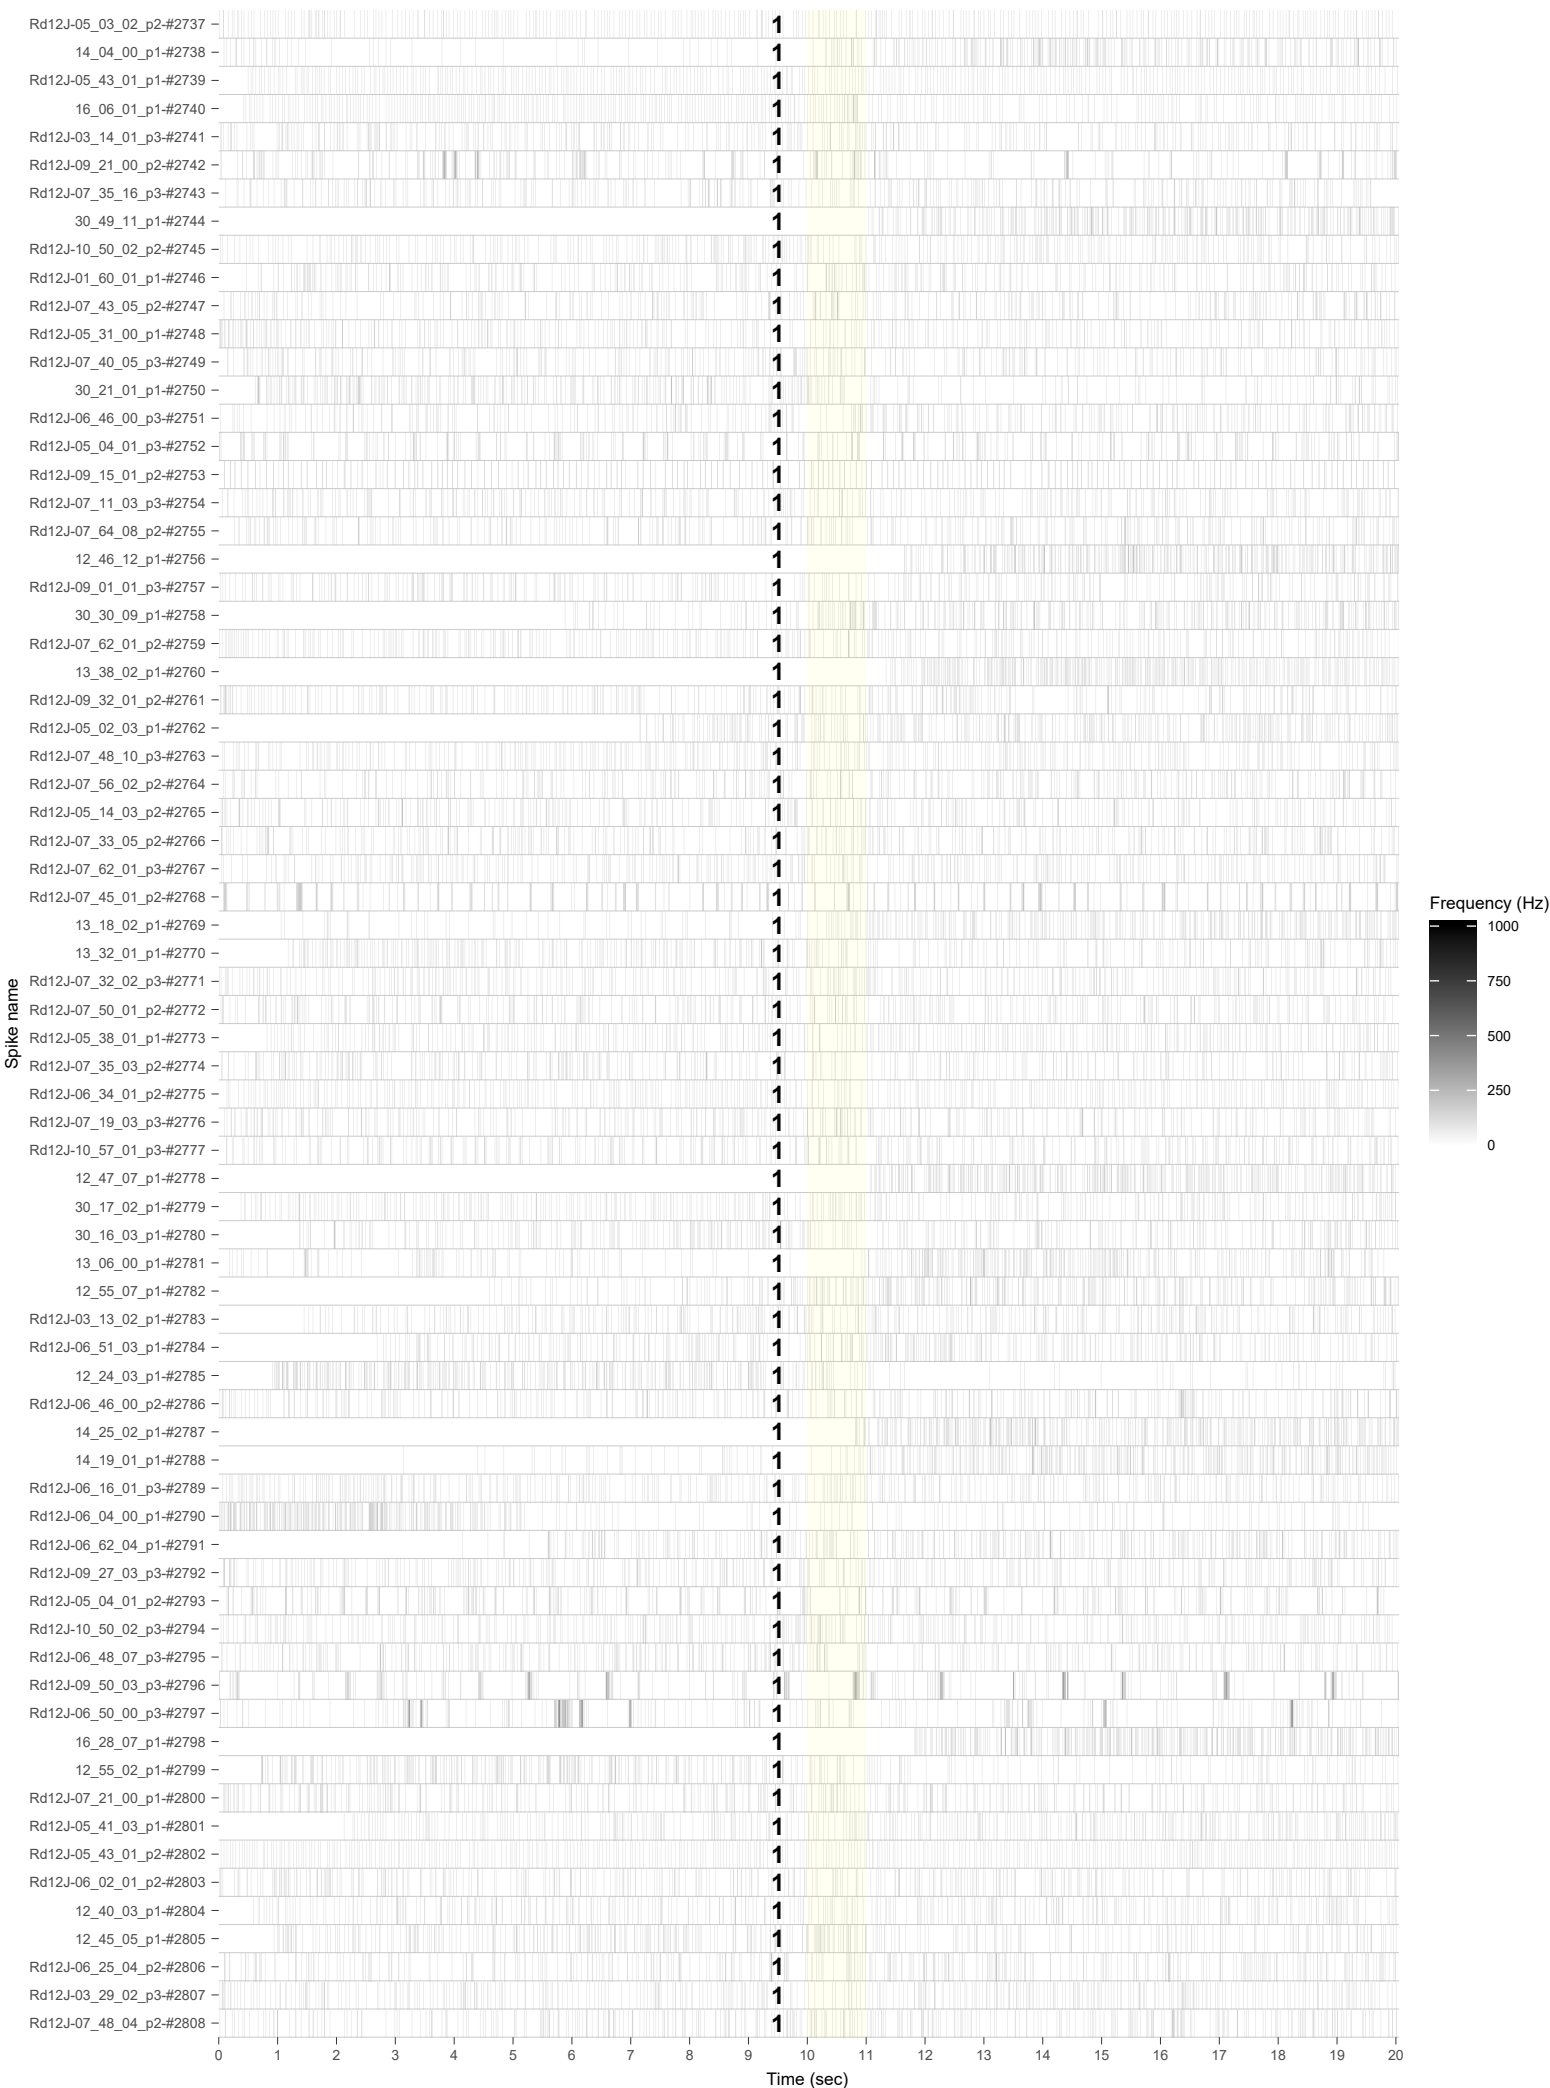

# Teaching dataset: Automatic clustering + Mandai modification (20160623125739) (page 40/54)

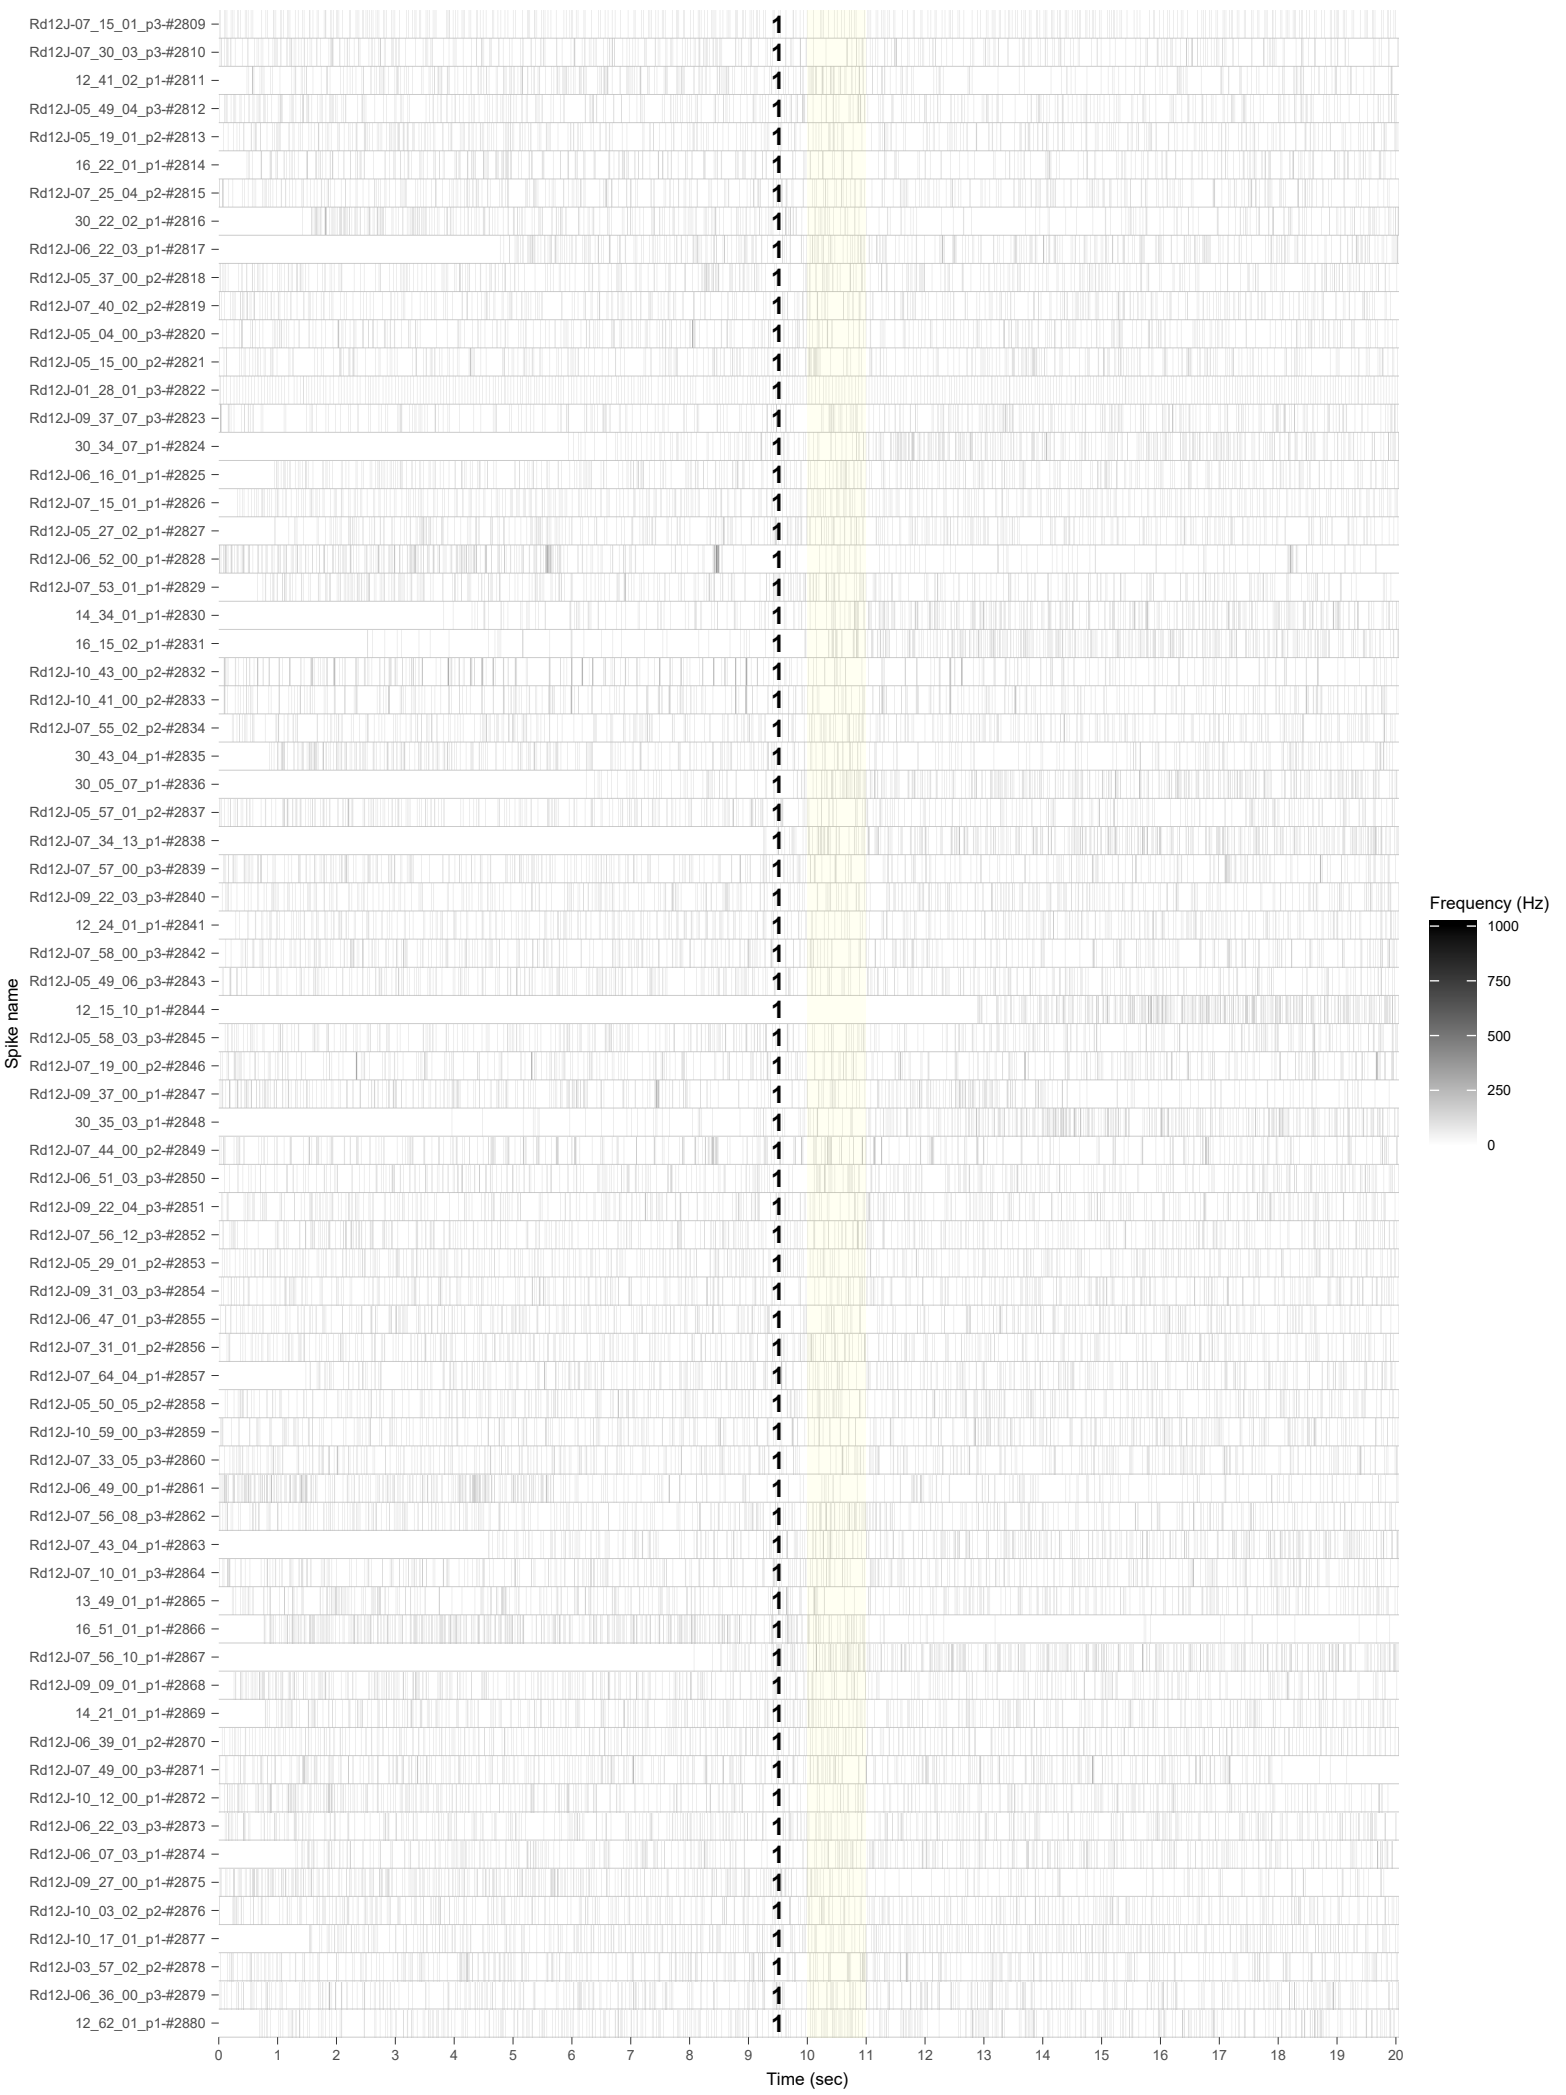



# Teaching dataset: Automatic clustering + Mandai modification (20160623125739) (page 41/54)

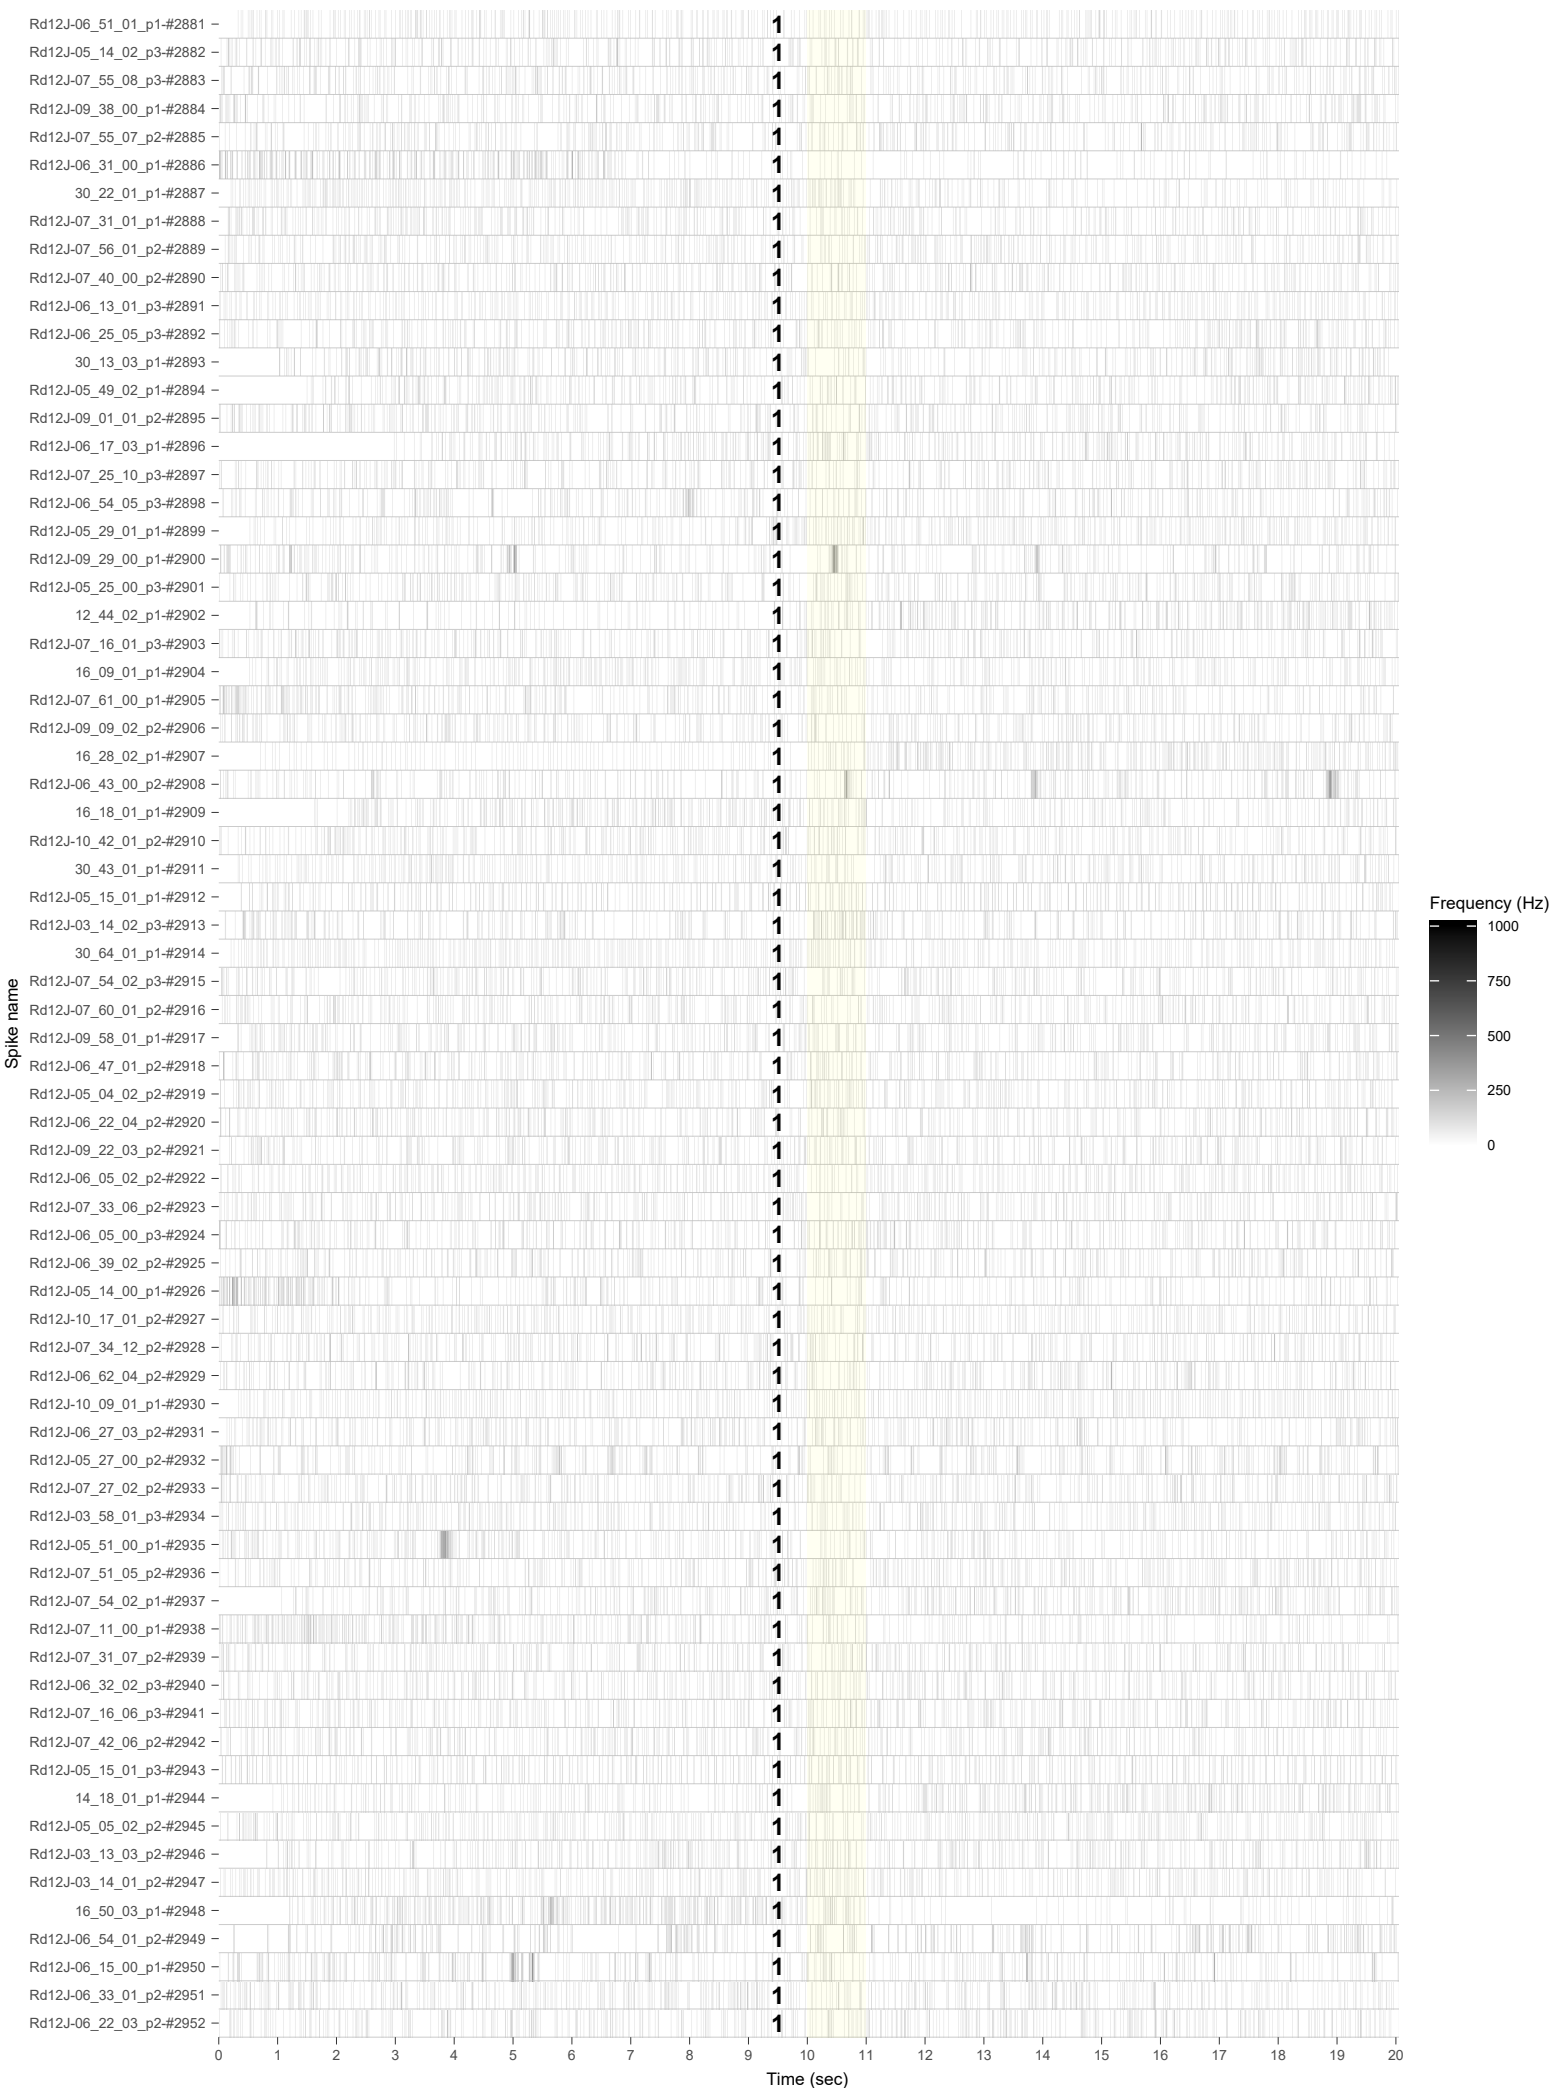

# Teaching dataset: Automatic clustering + Mandai modification (20160623125739) (page 42/54)

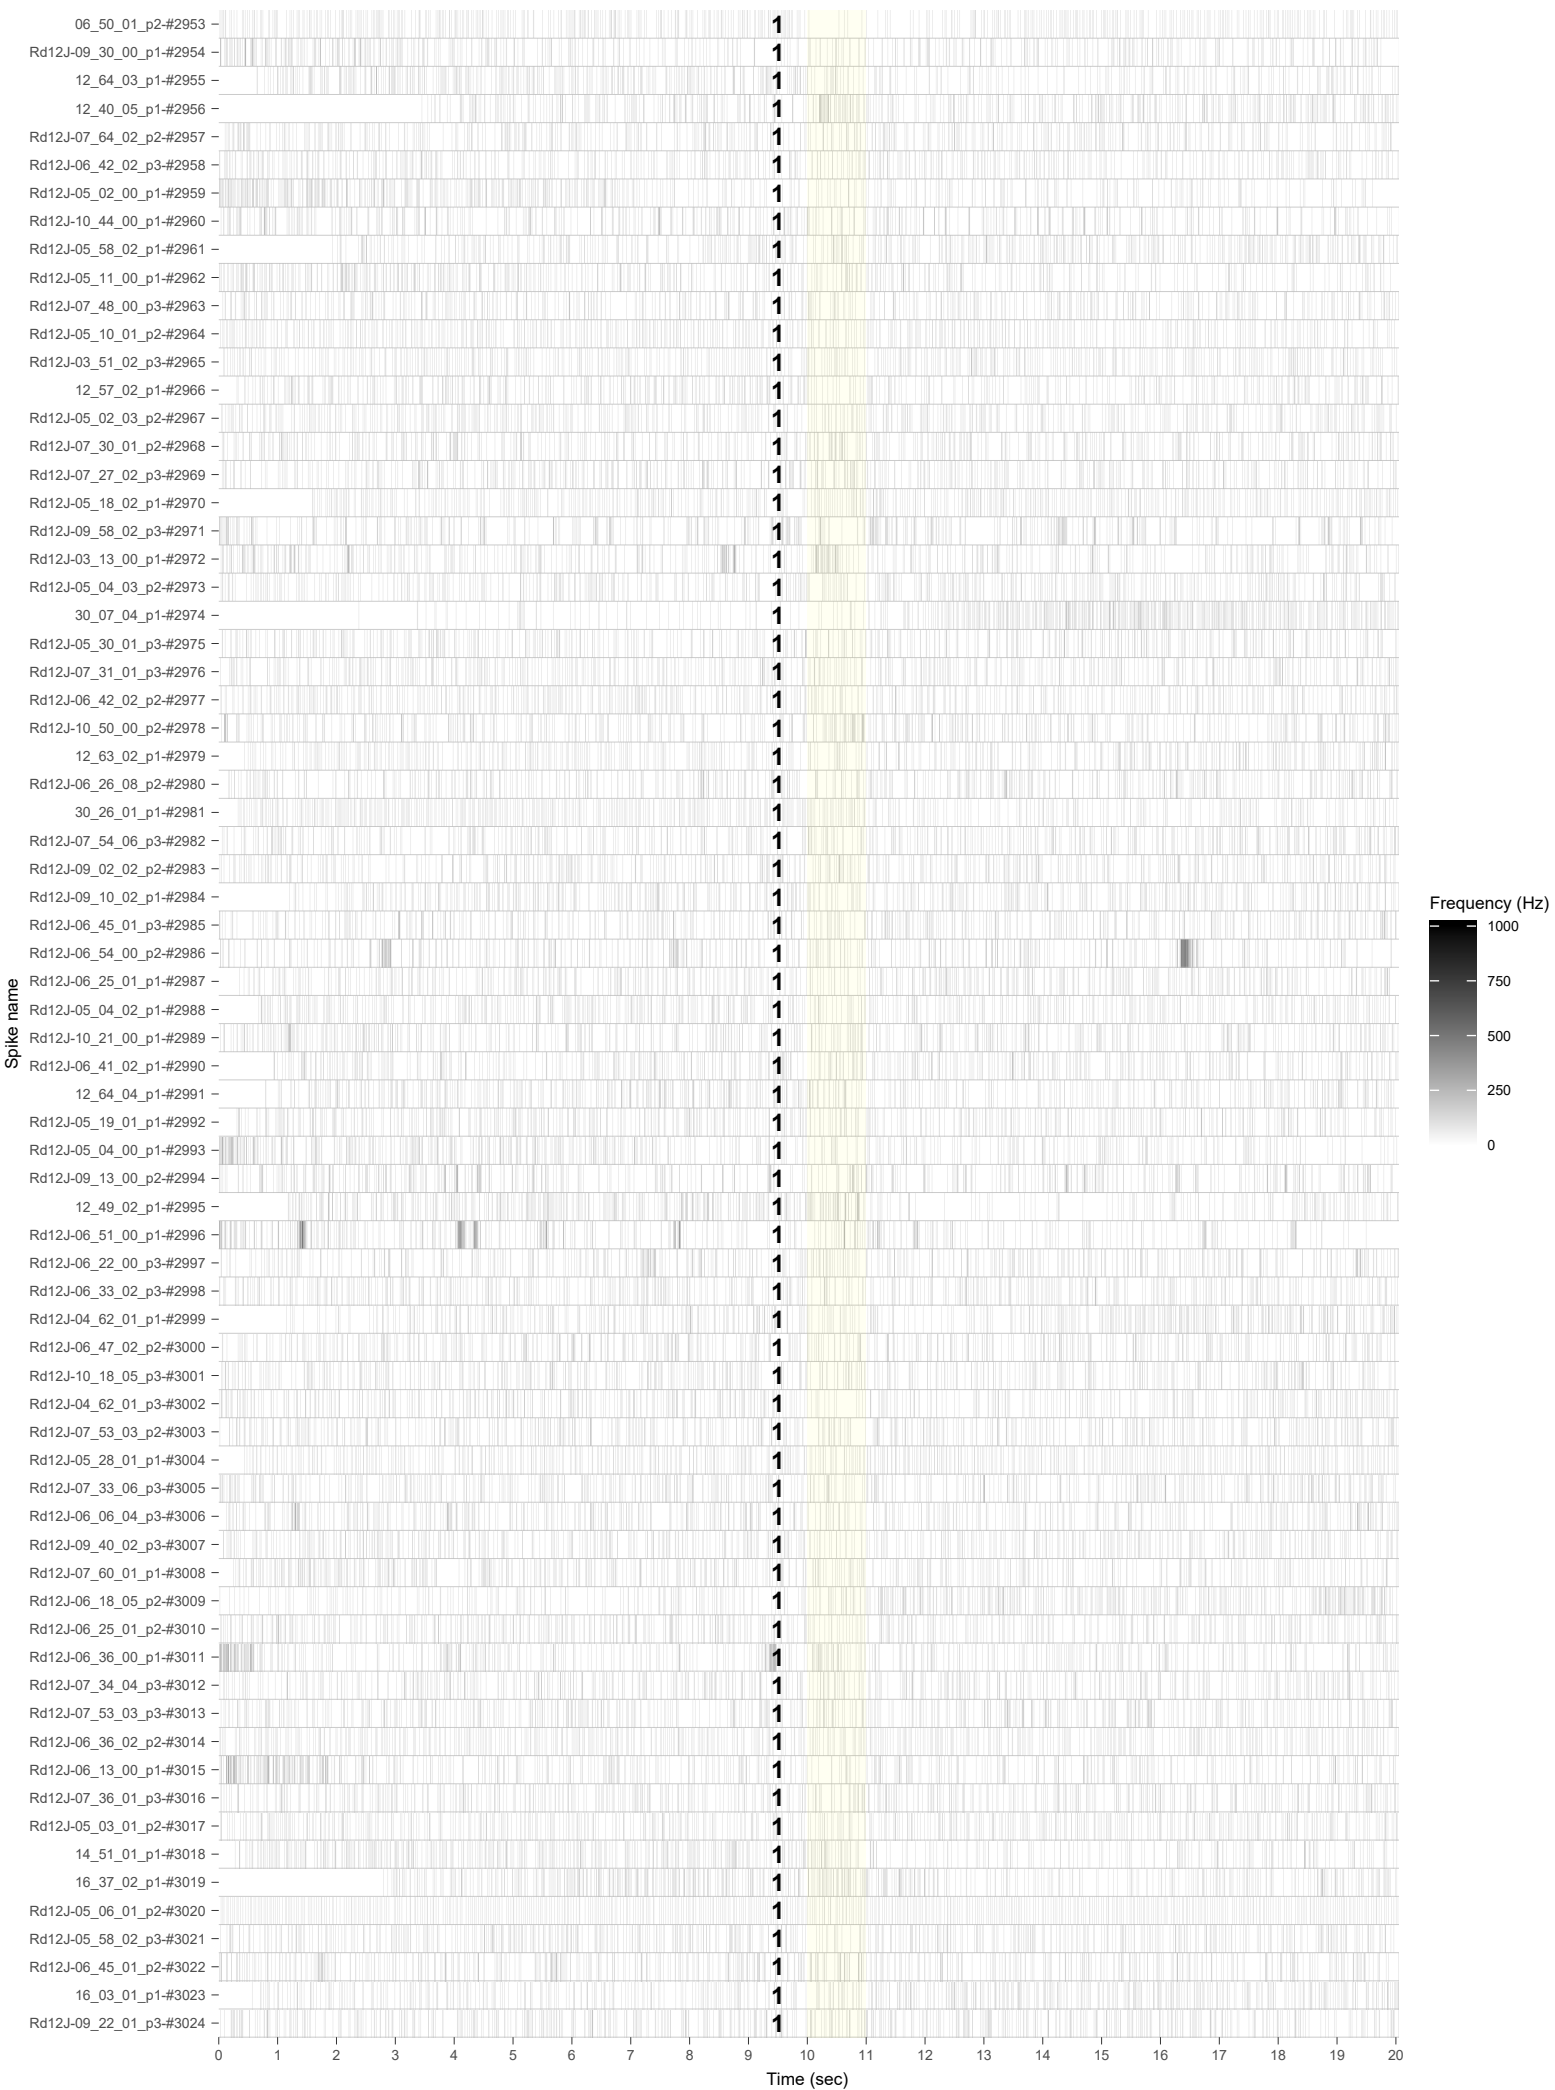

# Teaching dataset: Automatic clustering + Mandai modification (20160623125739) (page 43/54)

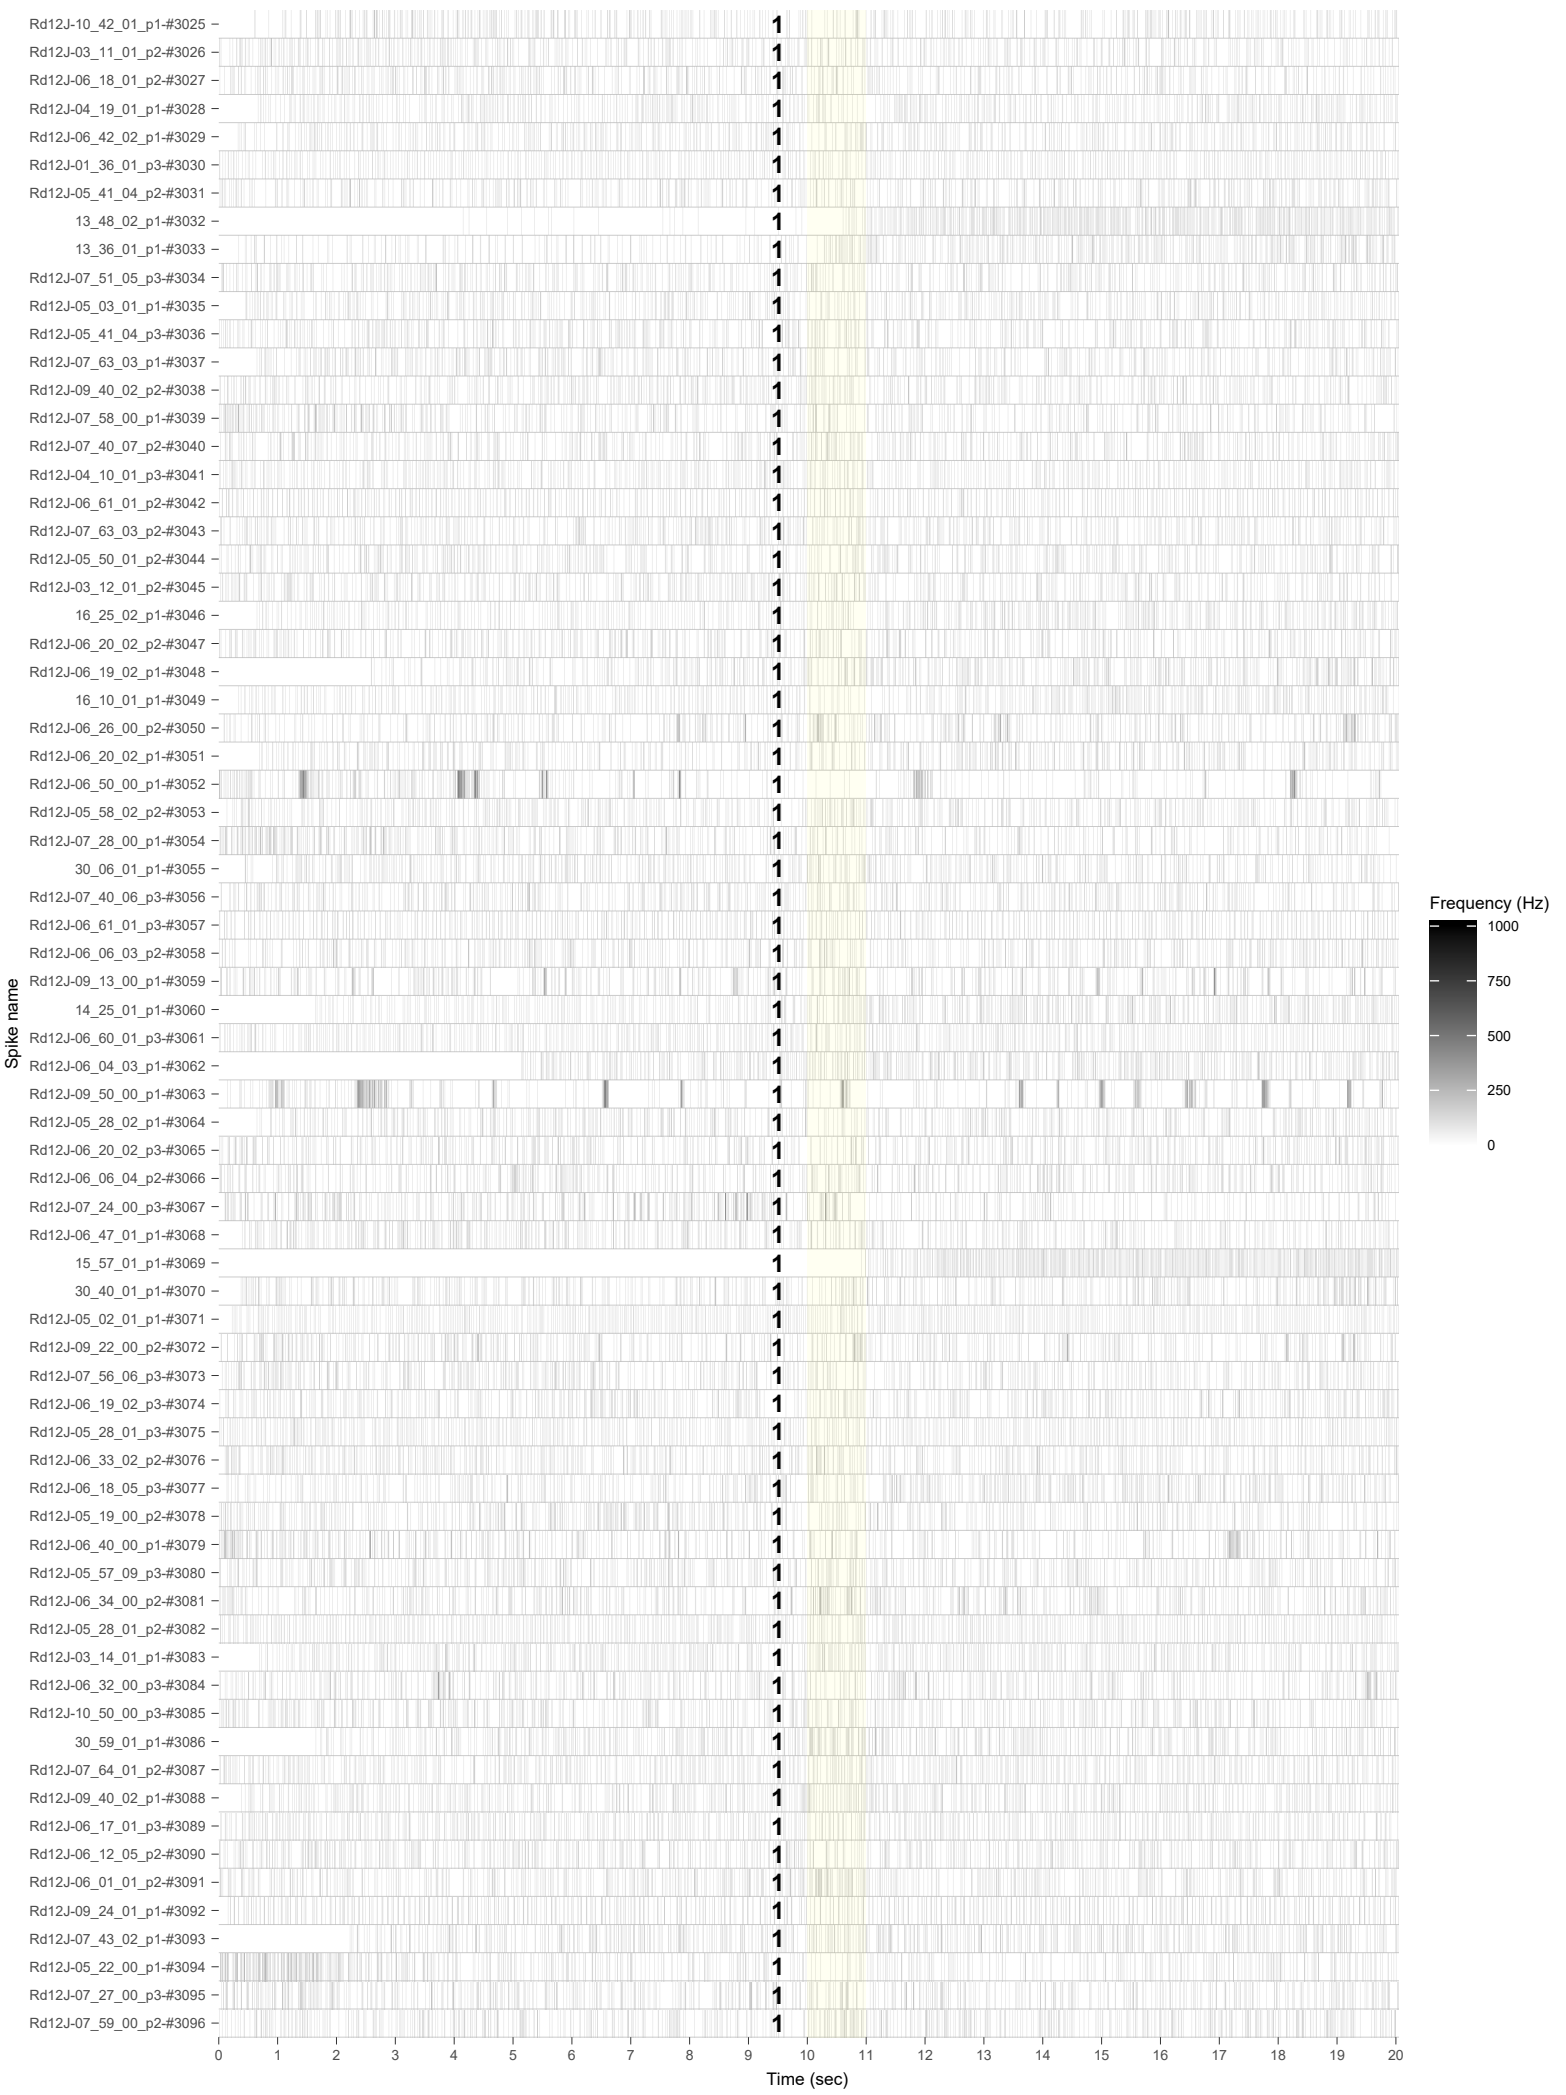

# Teaching dataset: Automatic clustering + Mandai modification (20160623125739) (page 44/54)

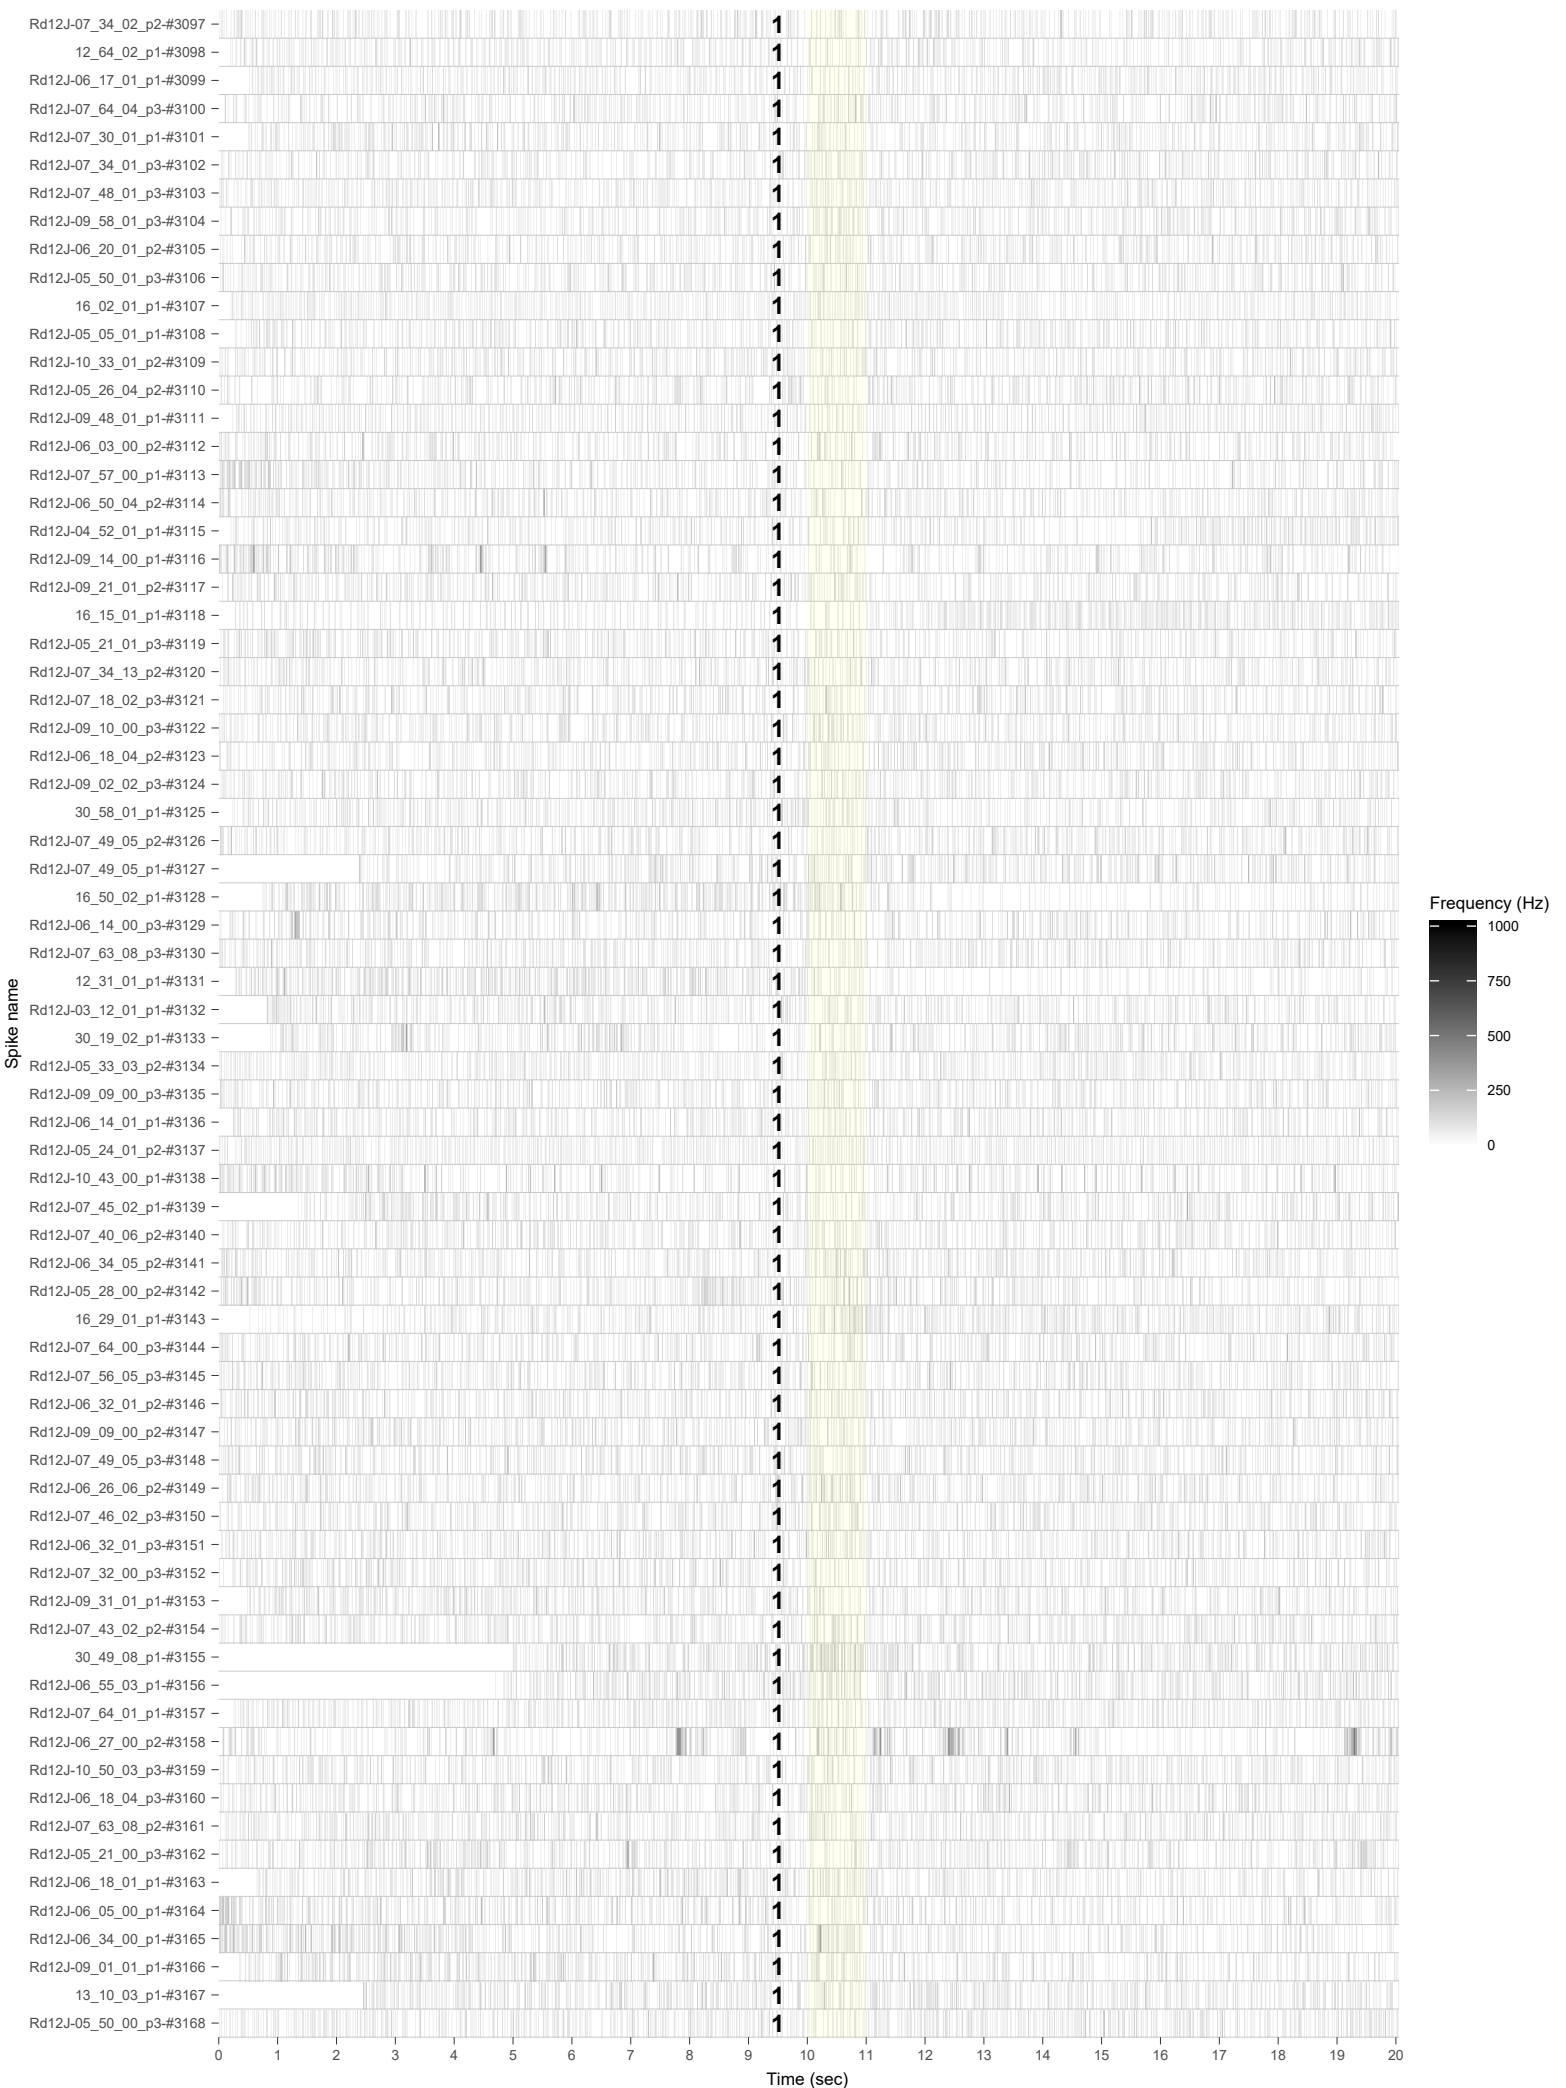

# Teaching dataset: Automatic clustering + Mandai modification (20160623125739) (page 45/54)

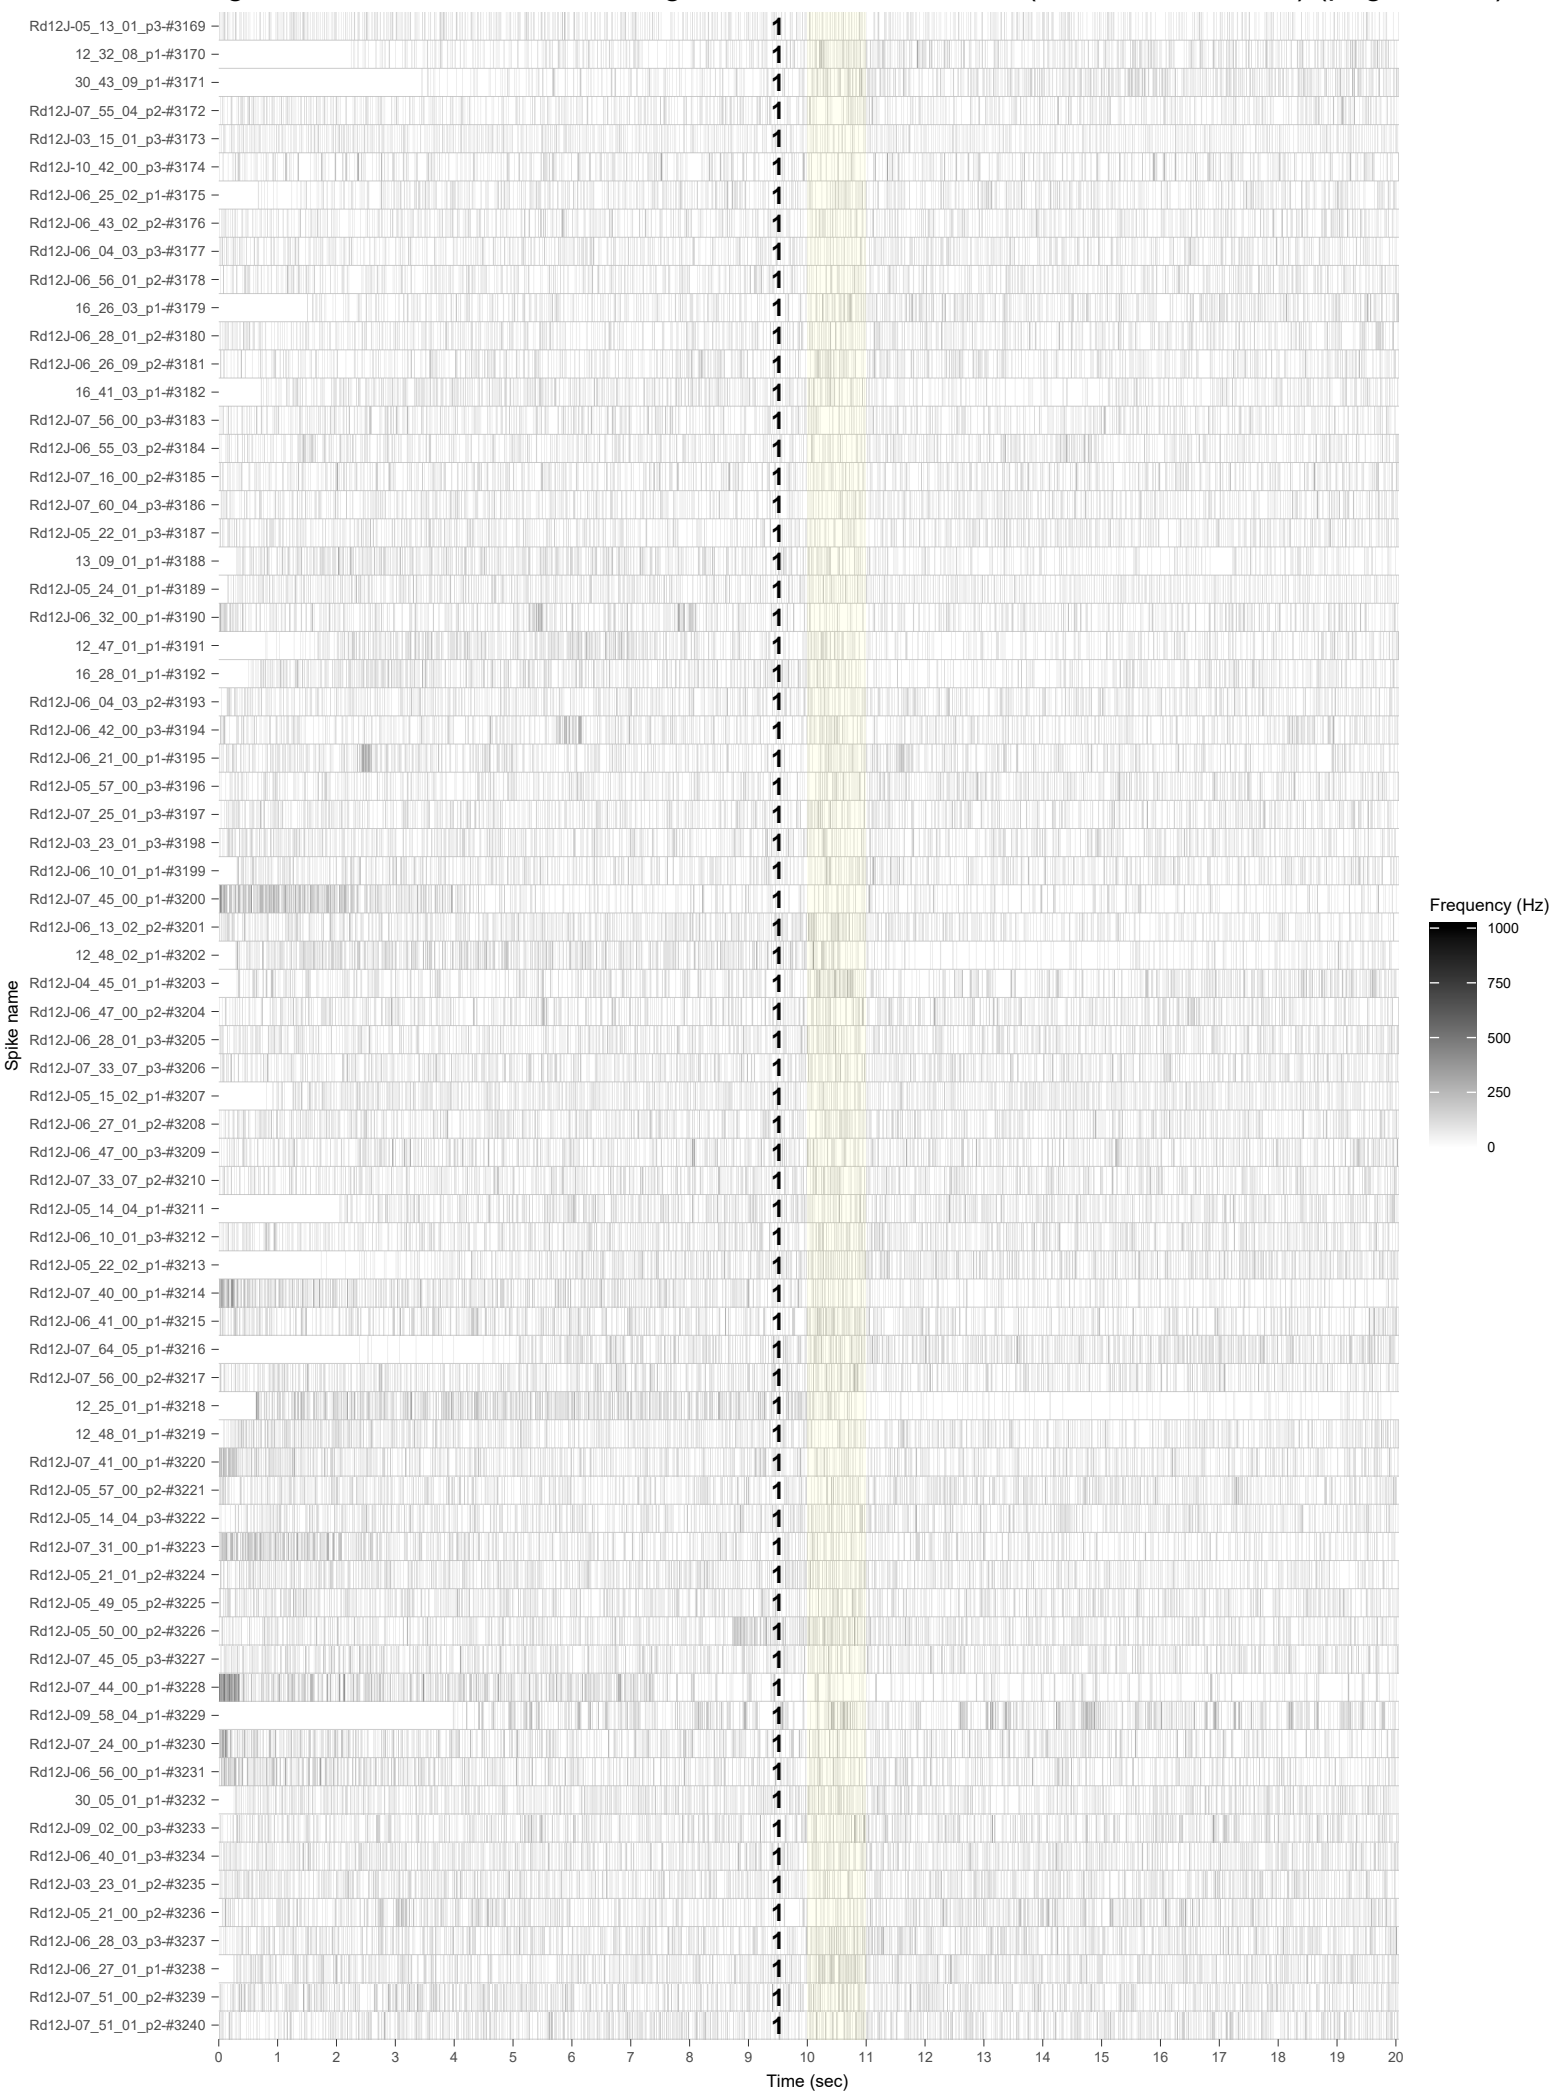

# Teaching dataset: Automatic clustering + Mandai modification (20160623125739) (page 46/54)

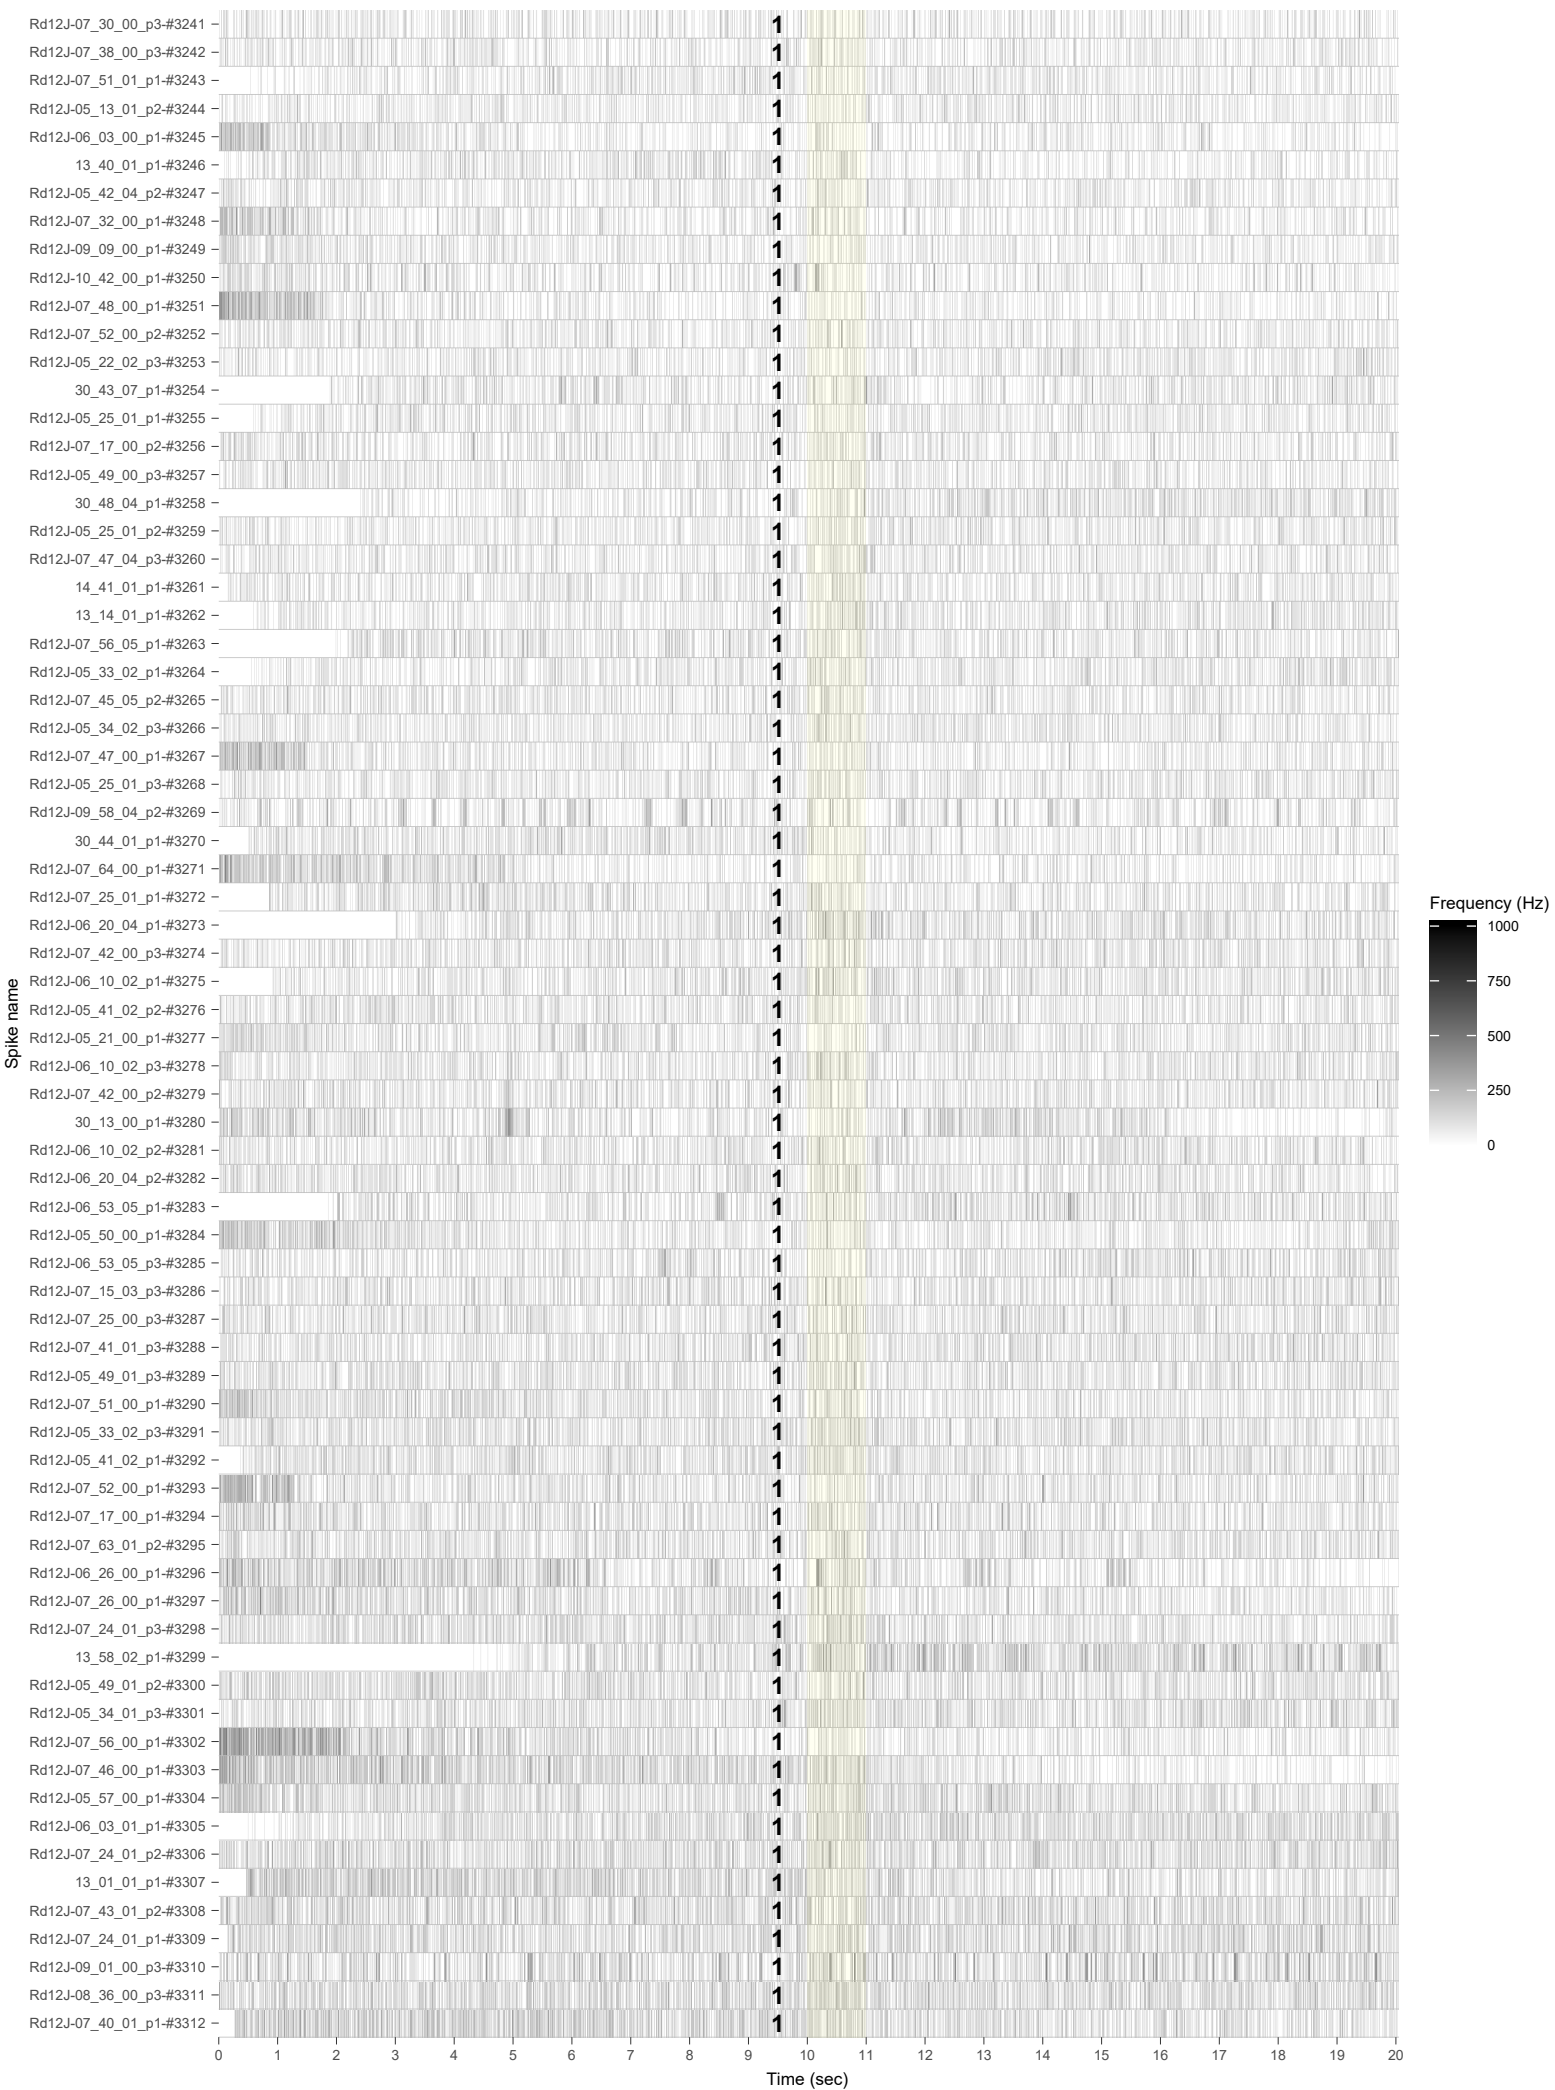

# Teaching dataset: Automatic clustering + Mandai modification (20160623125739) (page 47/54)

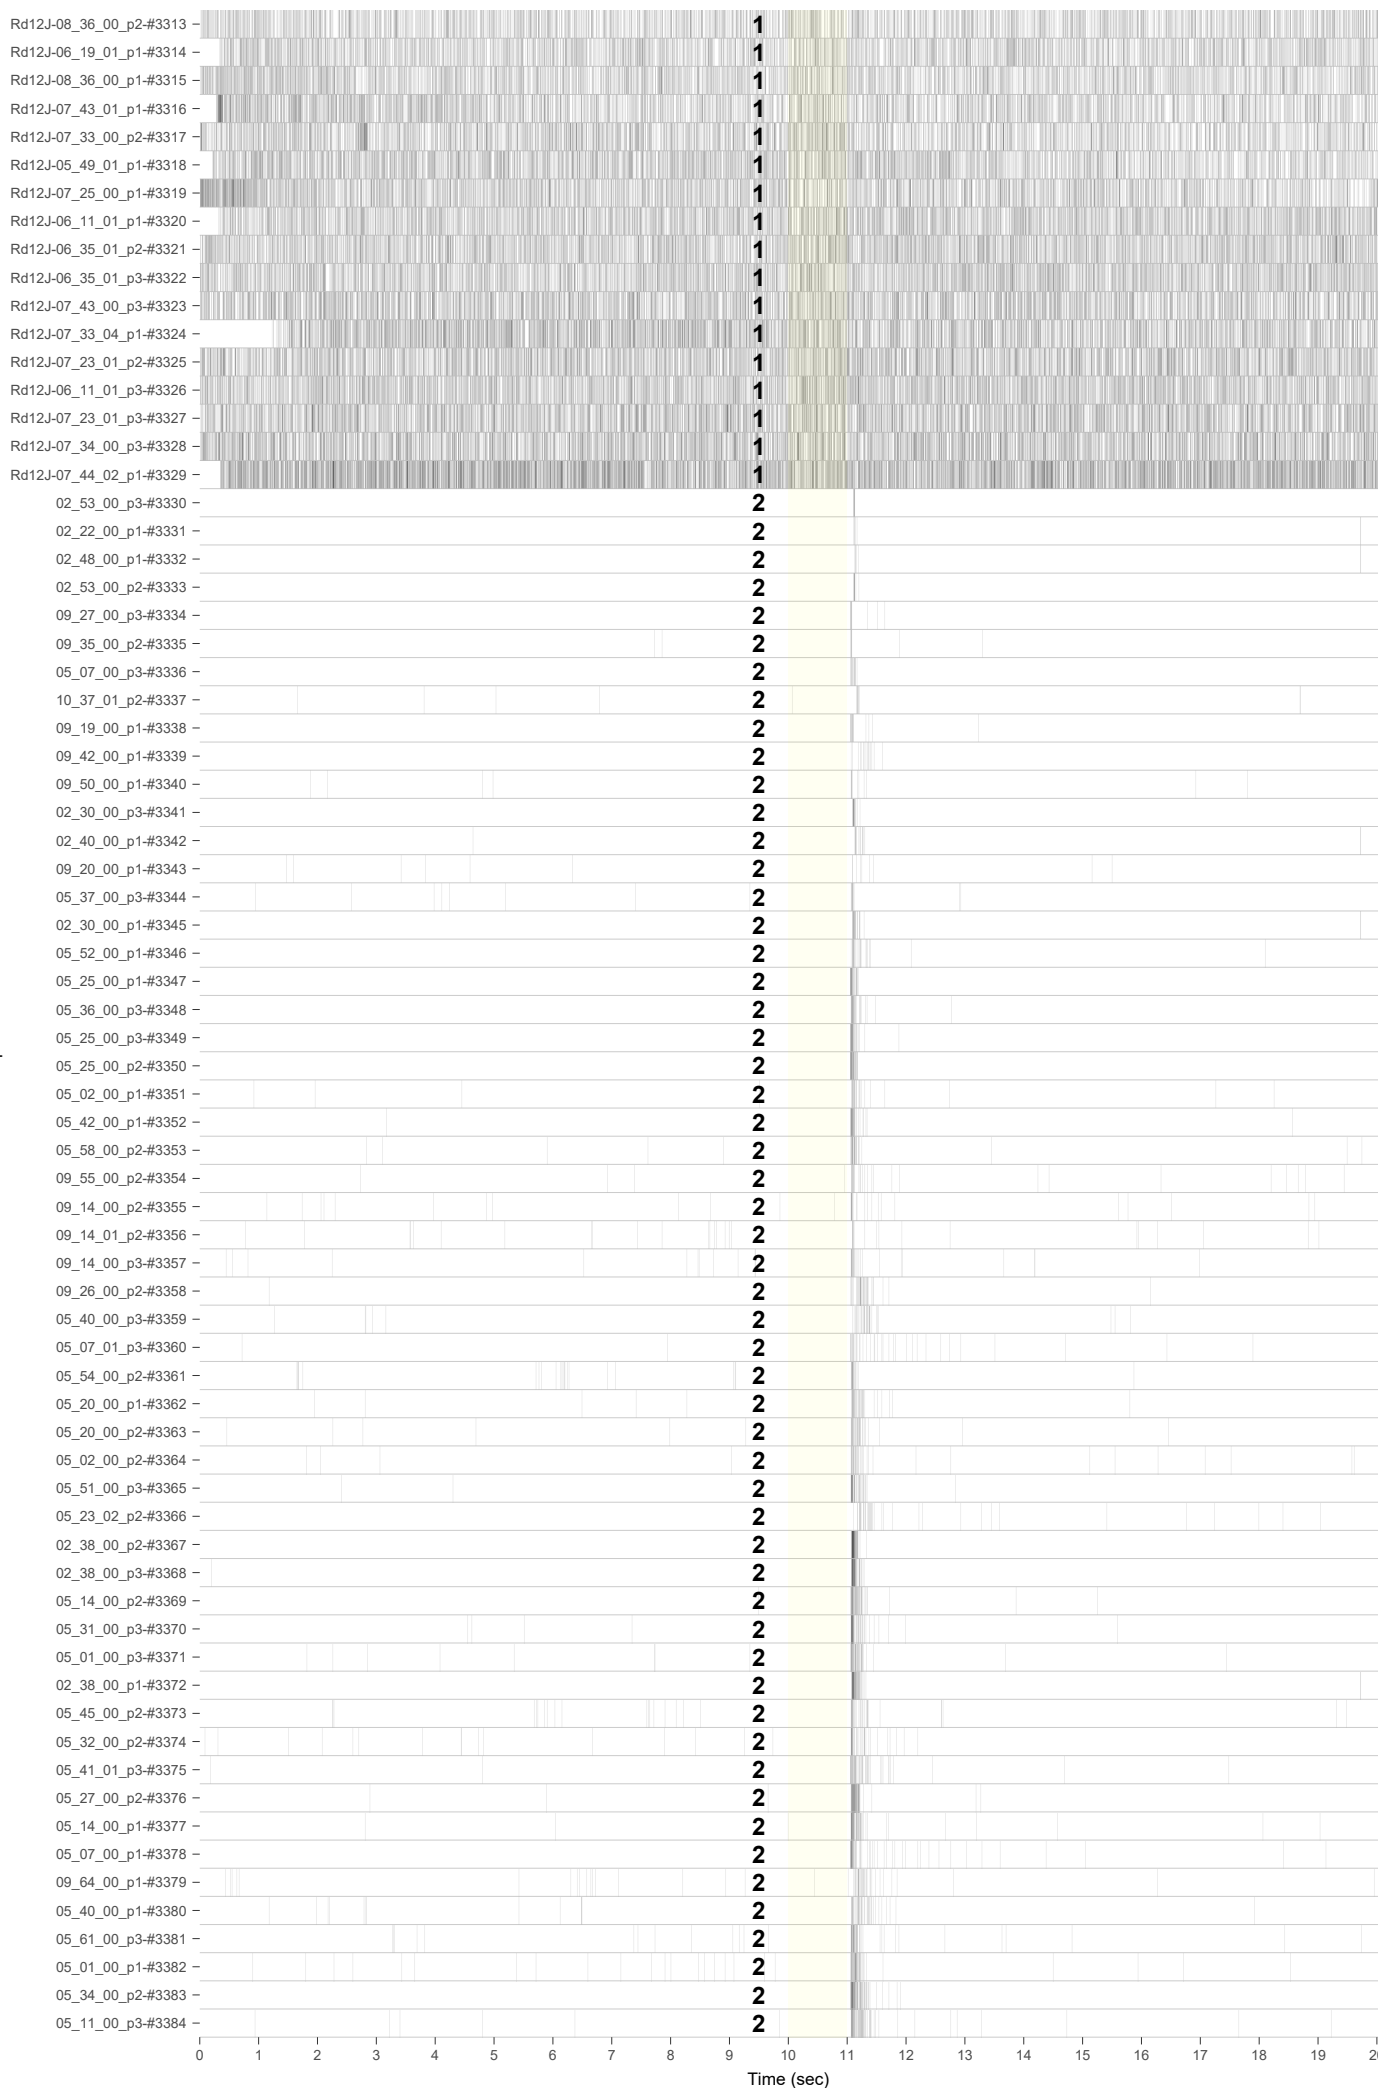

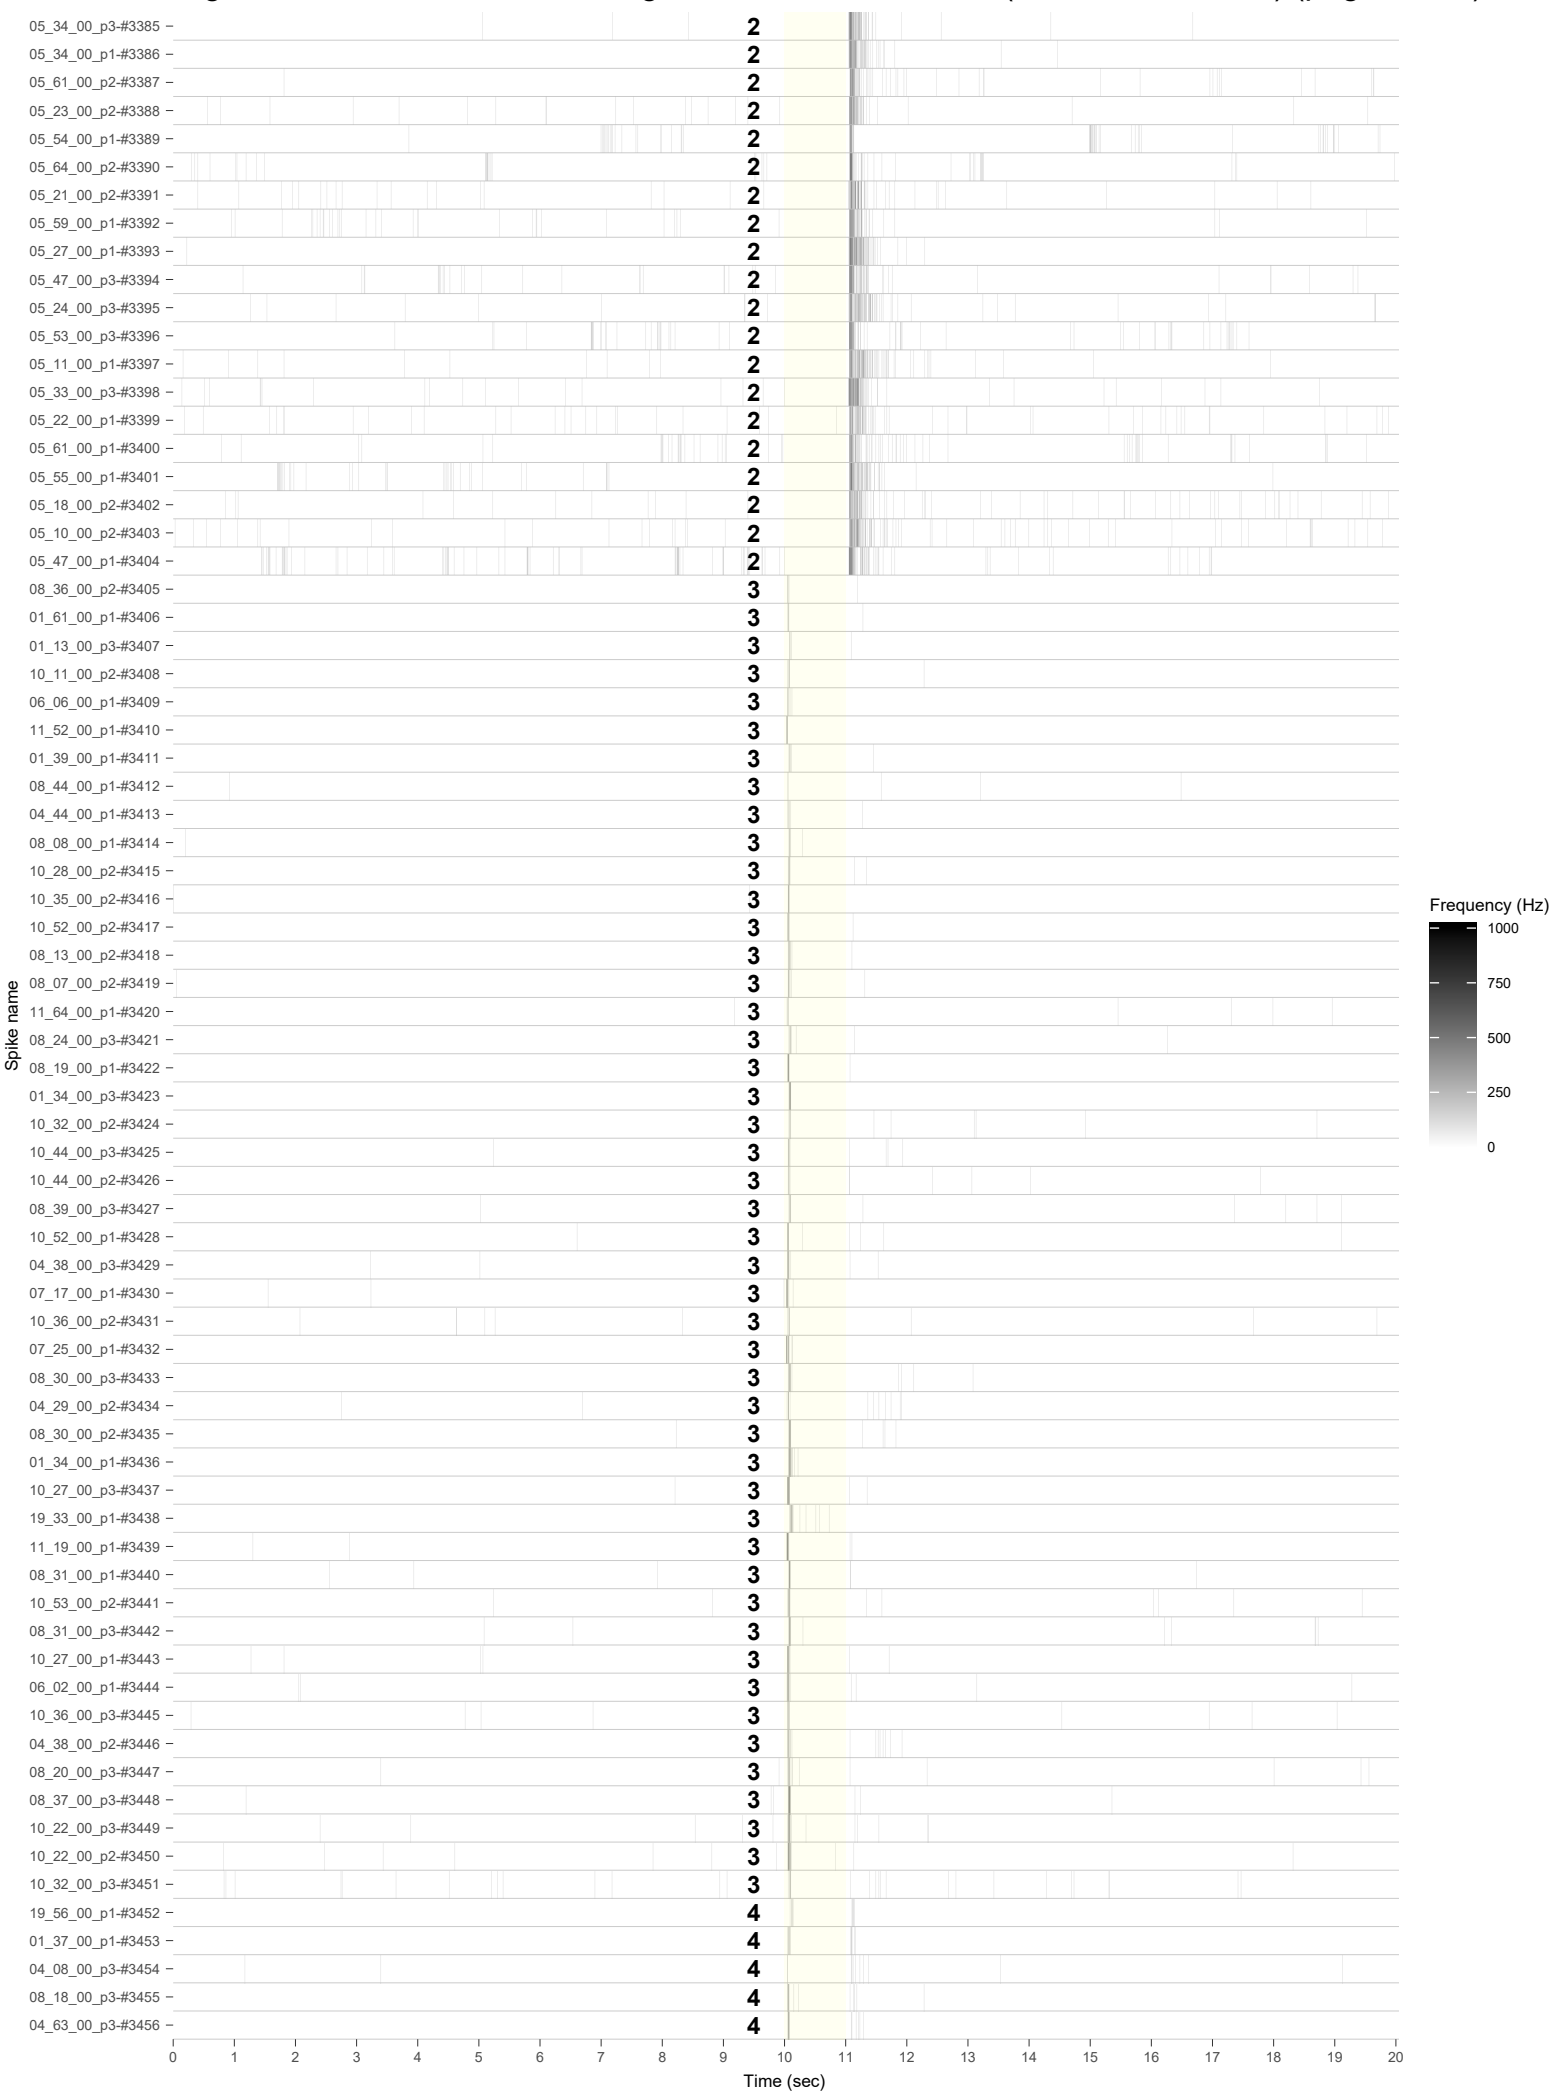



# Teaching dataset: Automatic clustering + Mandai modification (20160623125739) (page 49/54)

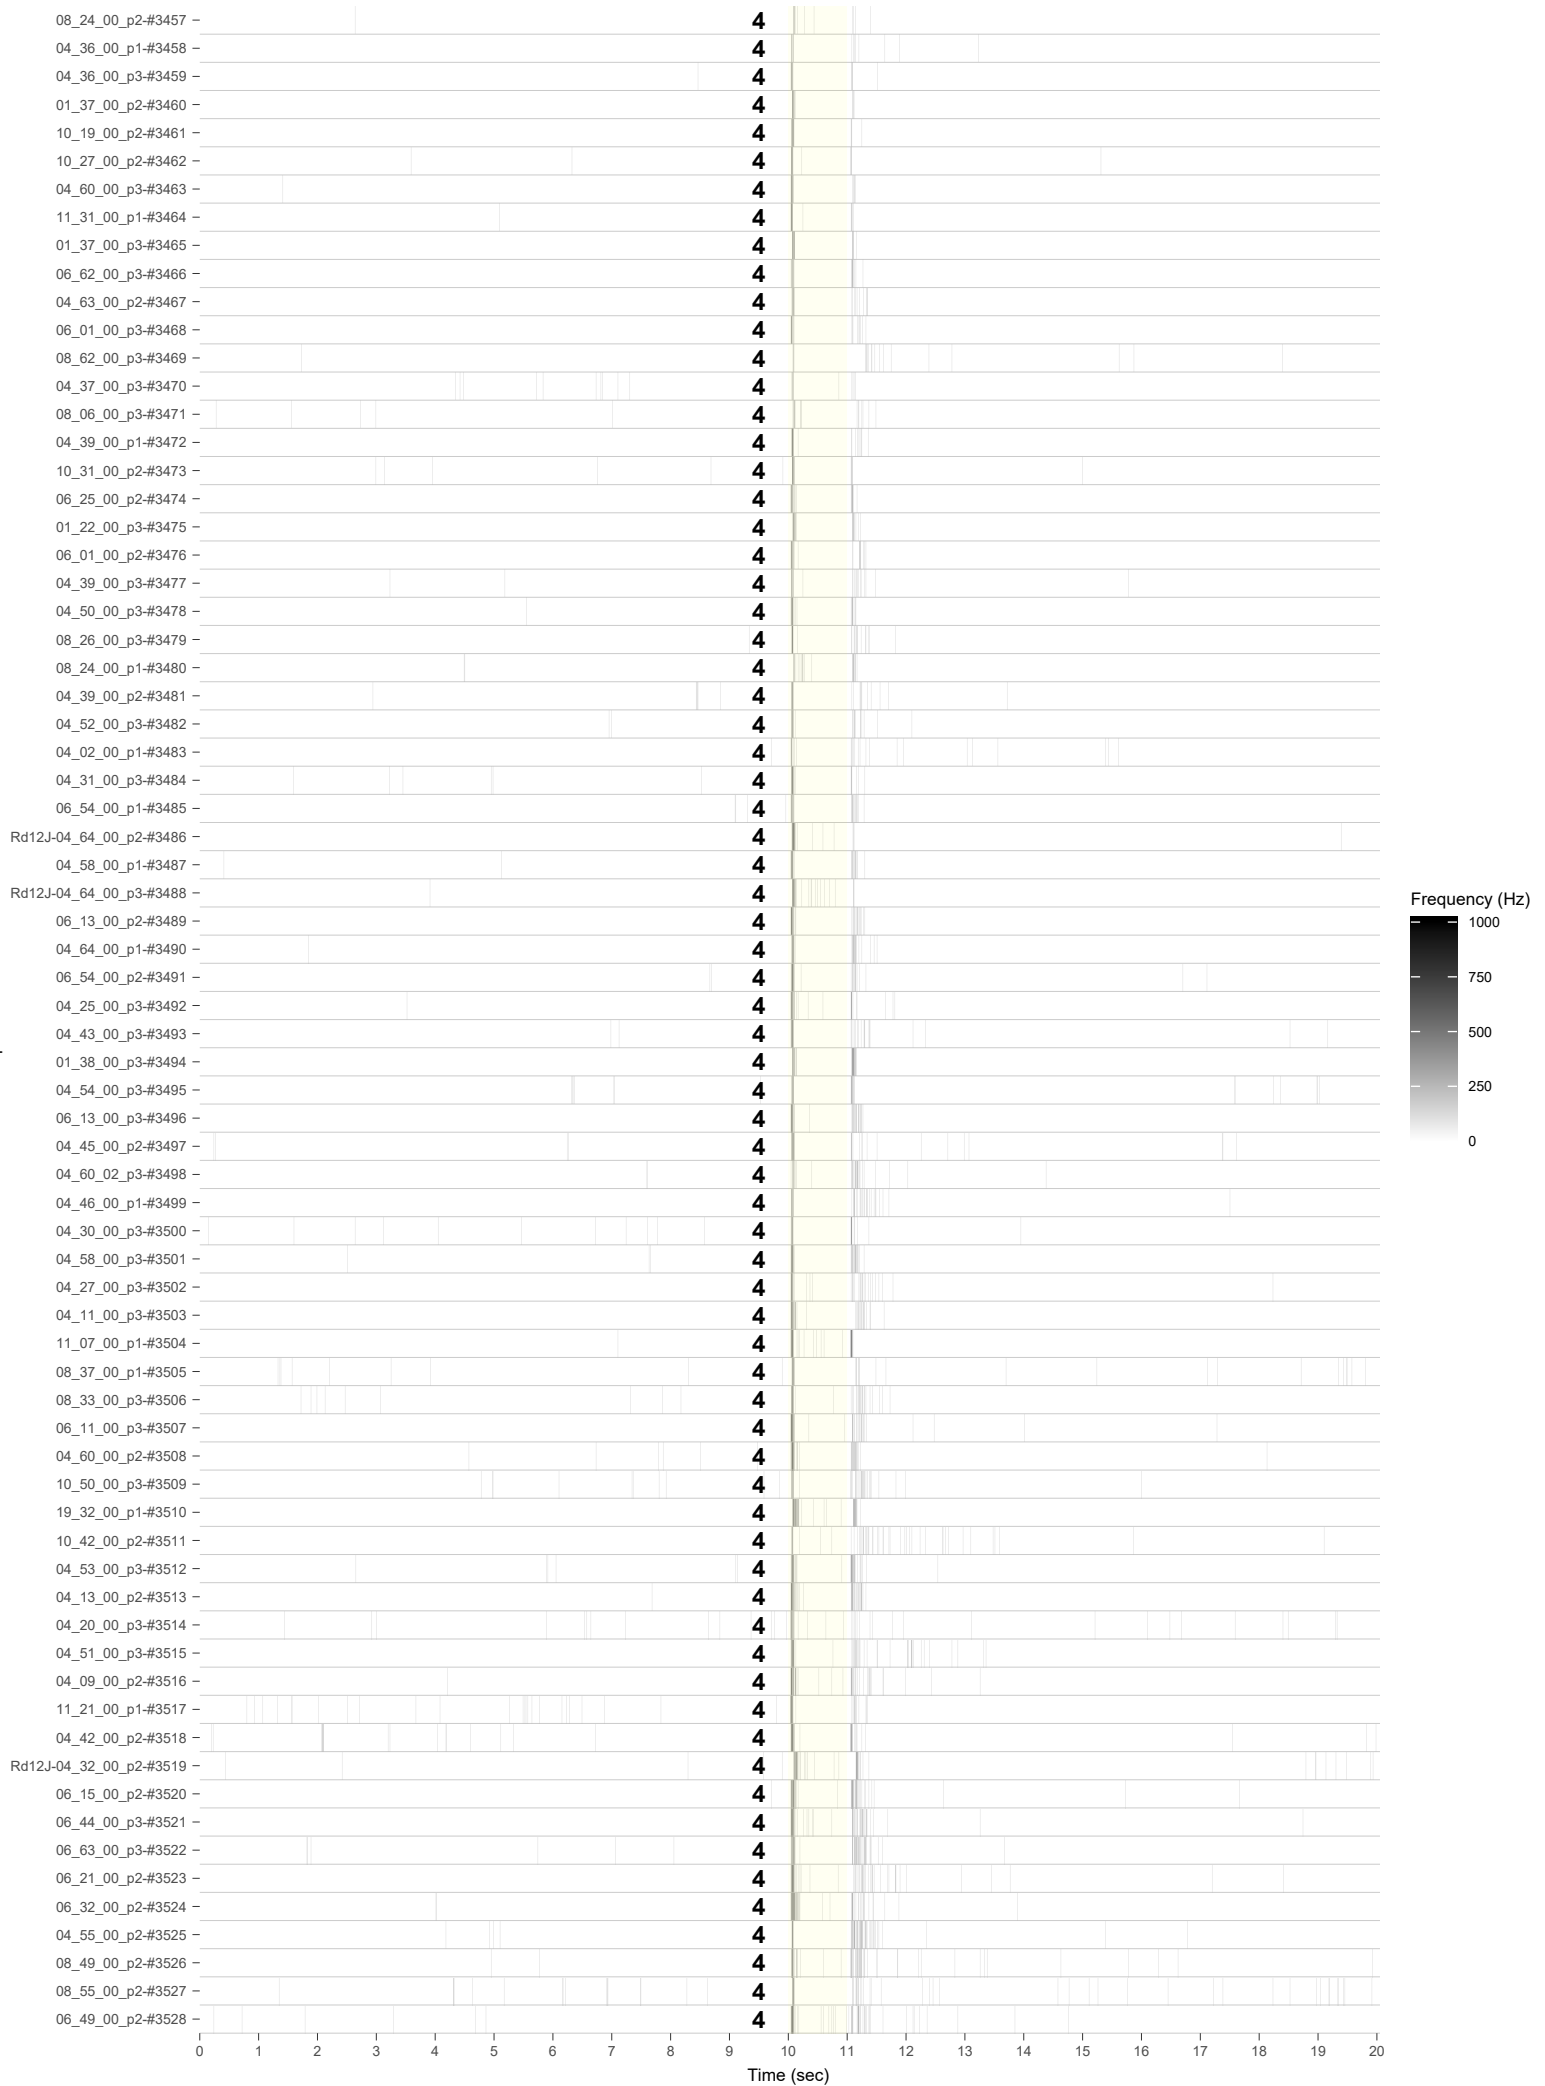

# Teaching dataset: Automatic clustering + Mandai modification (20160623125739) (page 50/54)

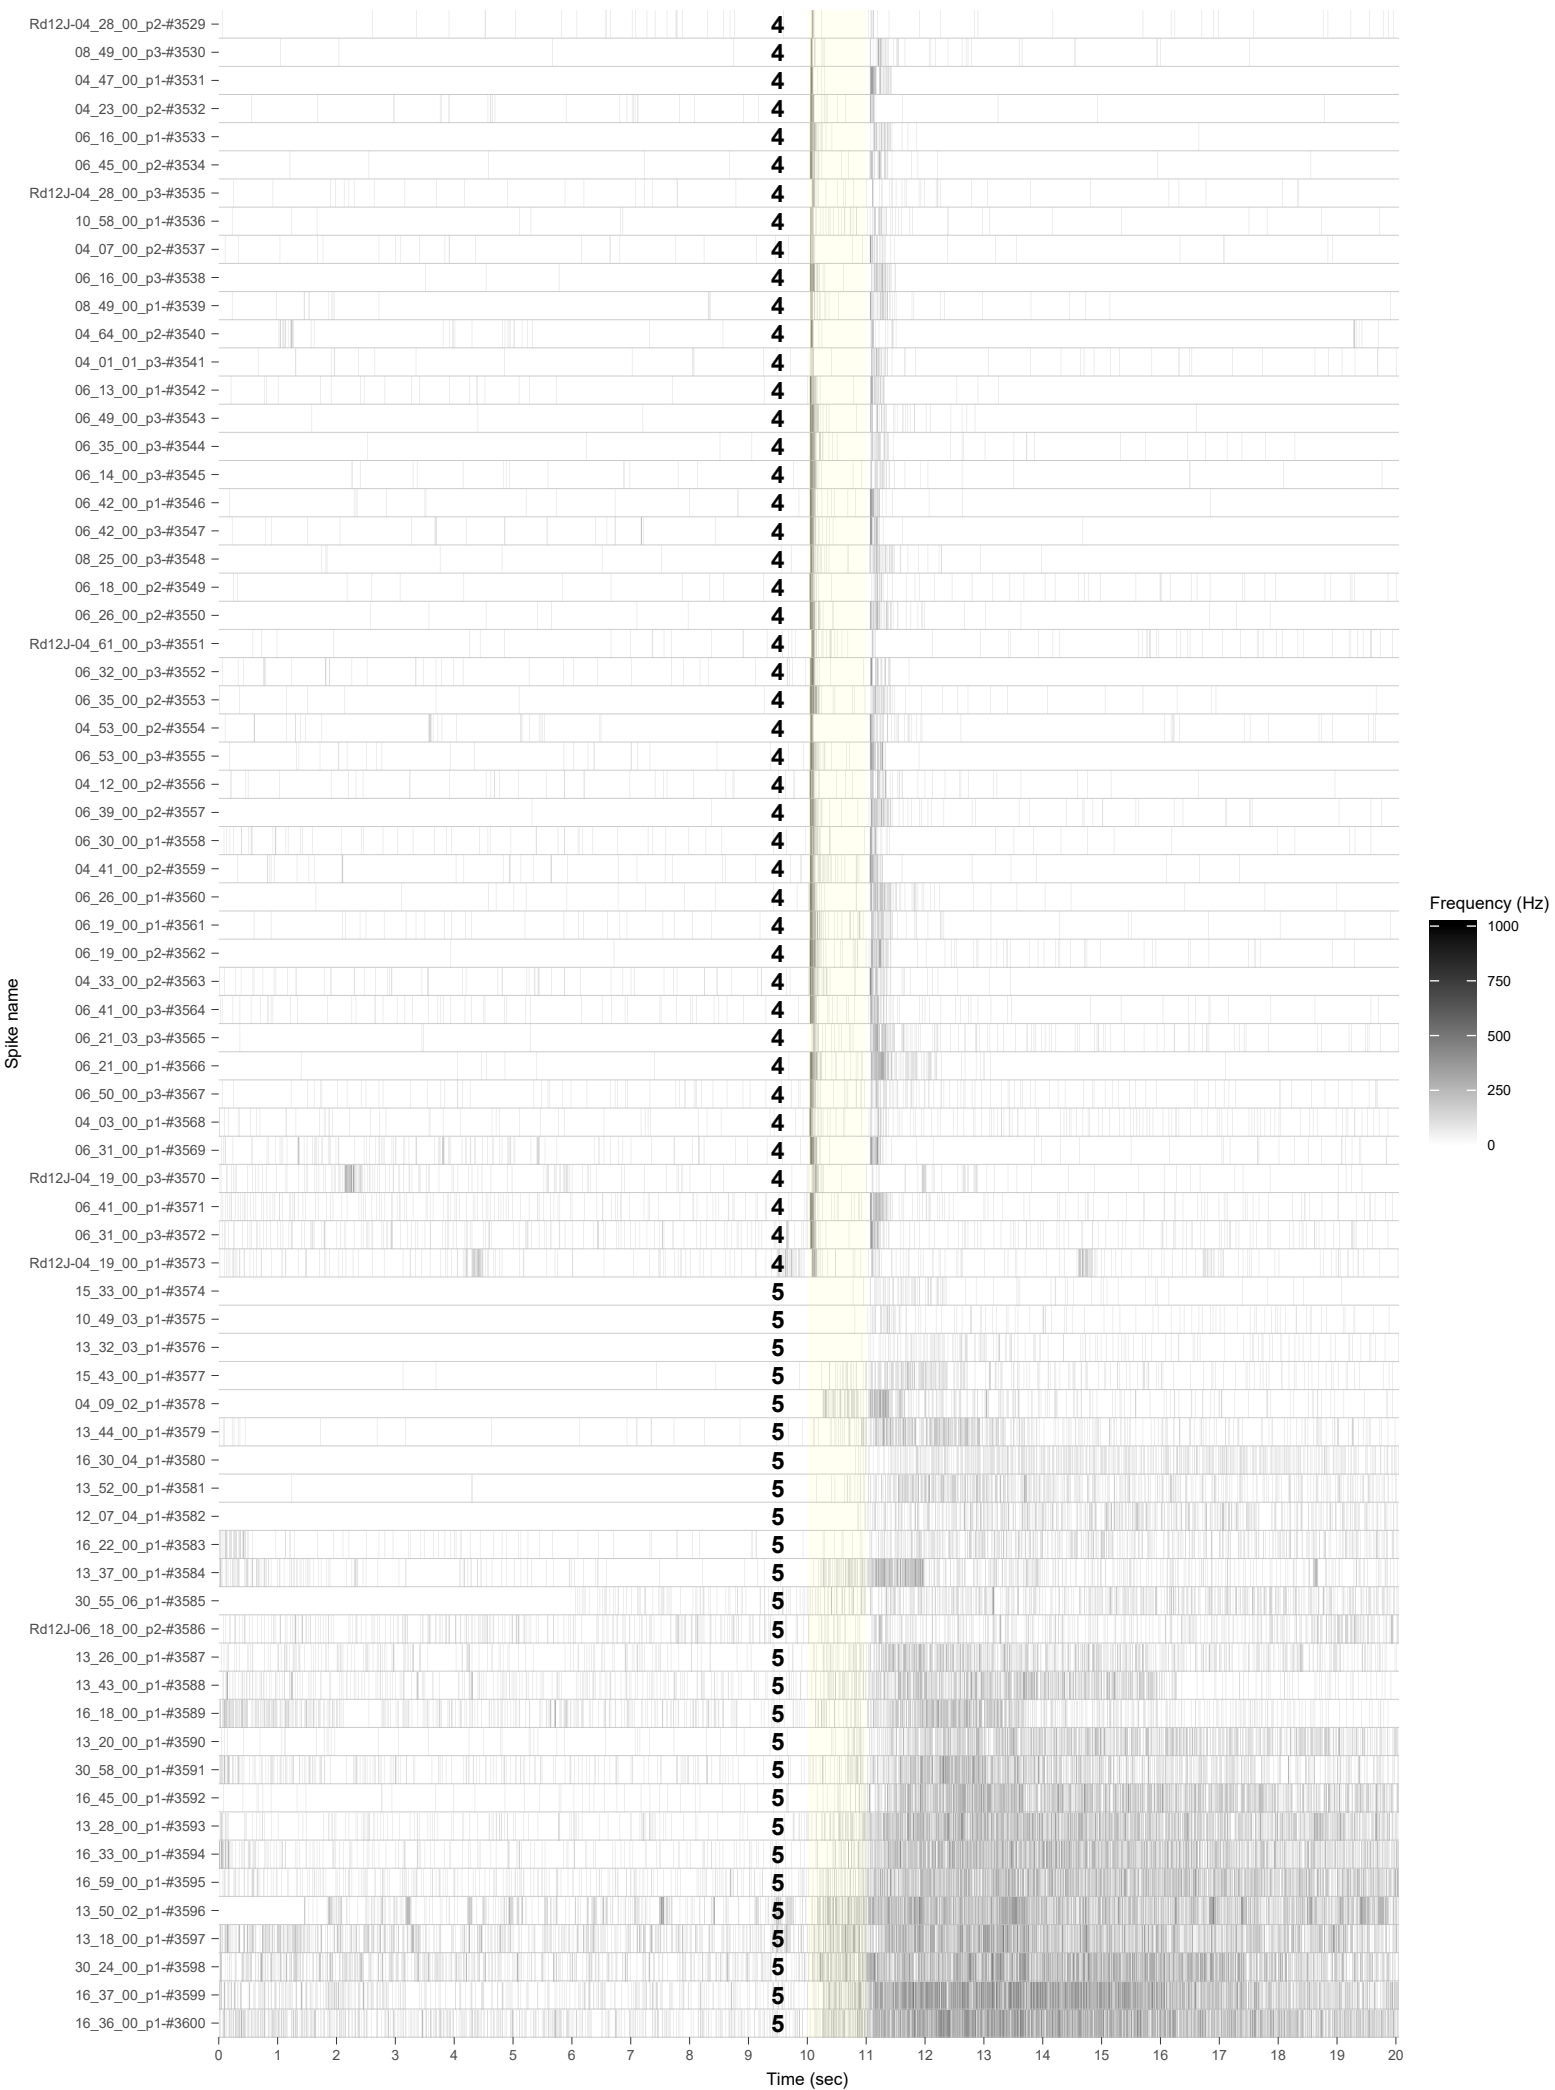

# Teaching dataset: Automatic clustering + Mandai modification (20160623125739) (page 51/54)

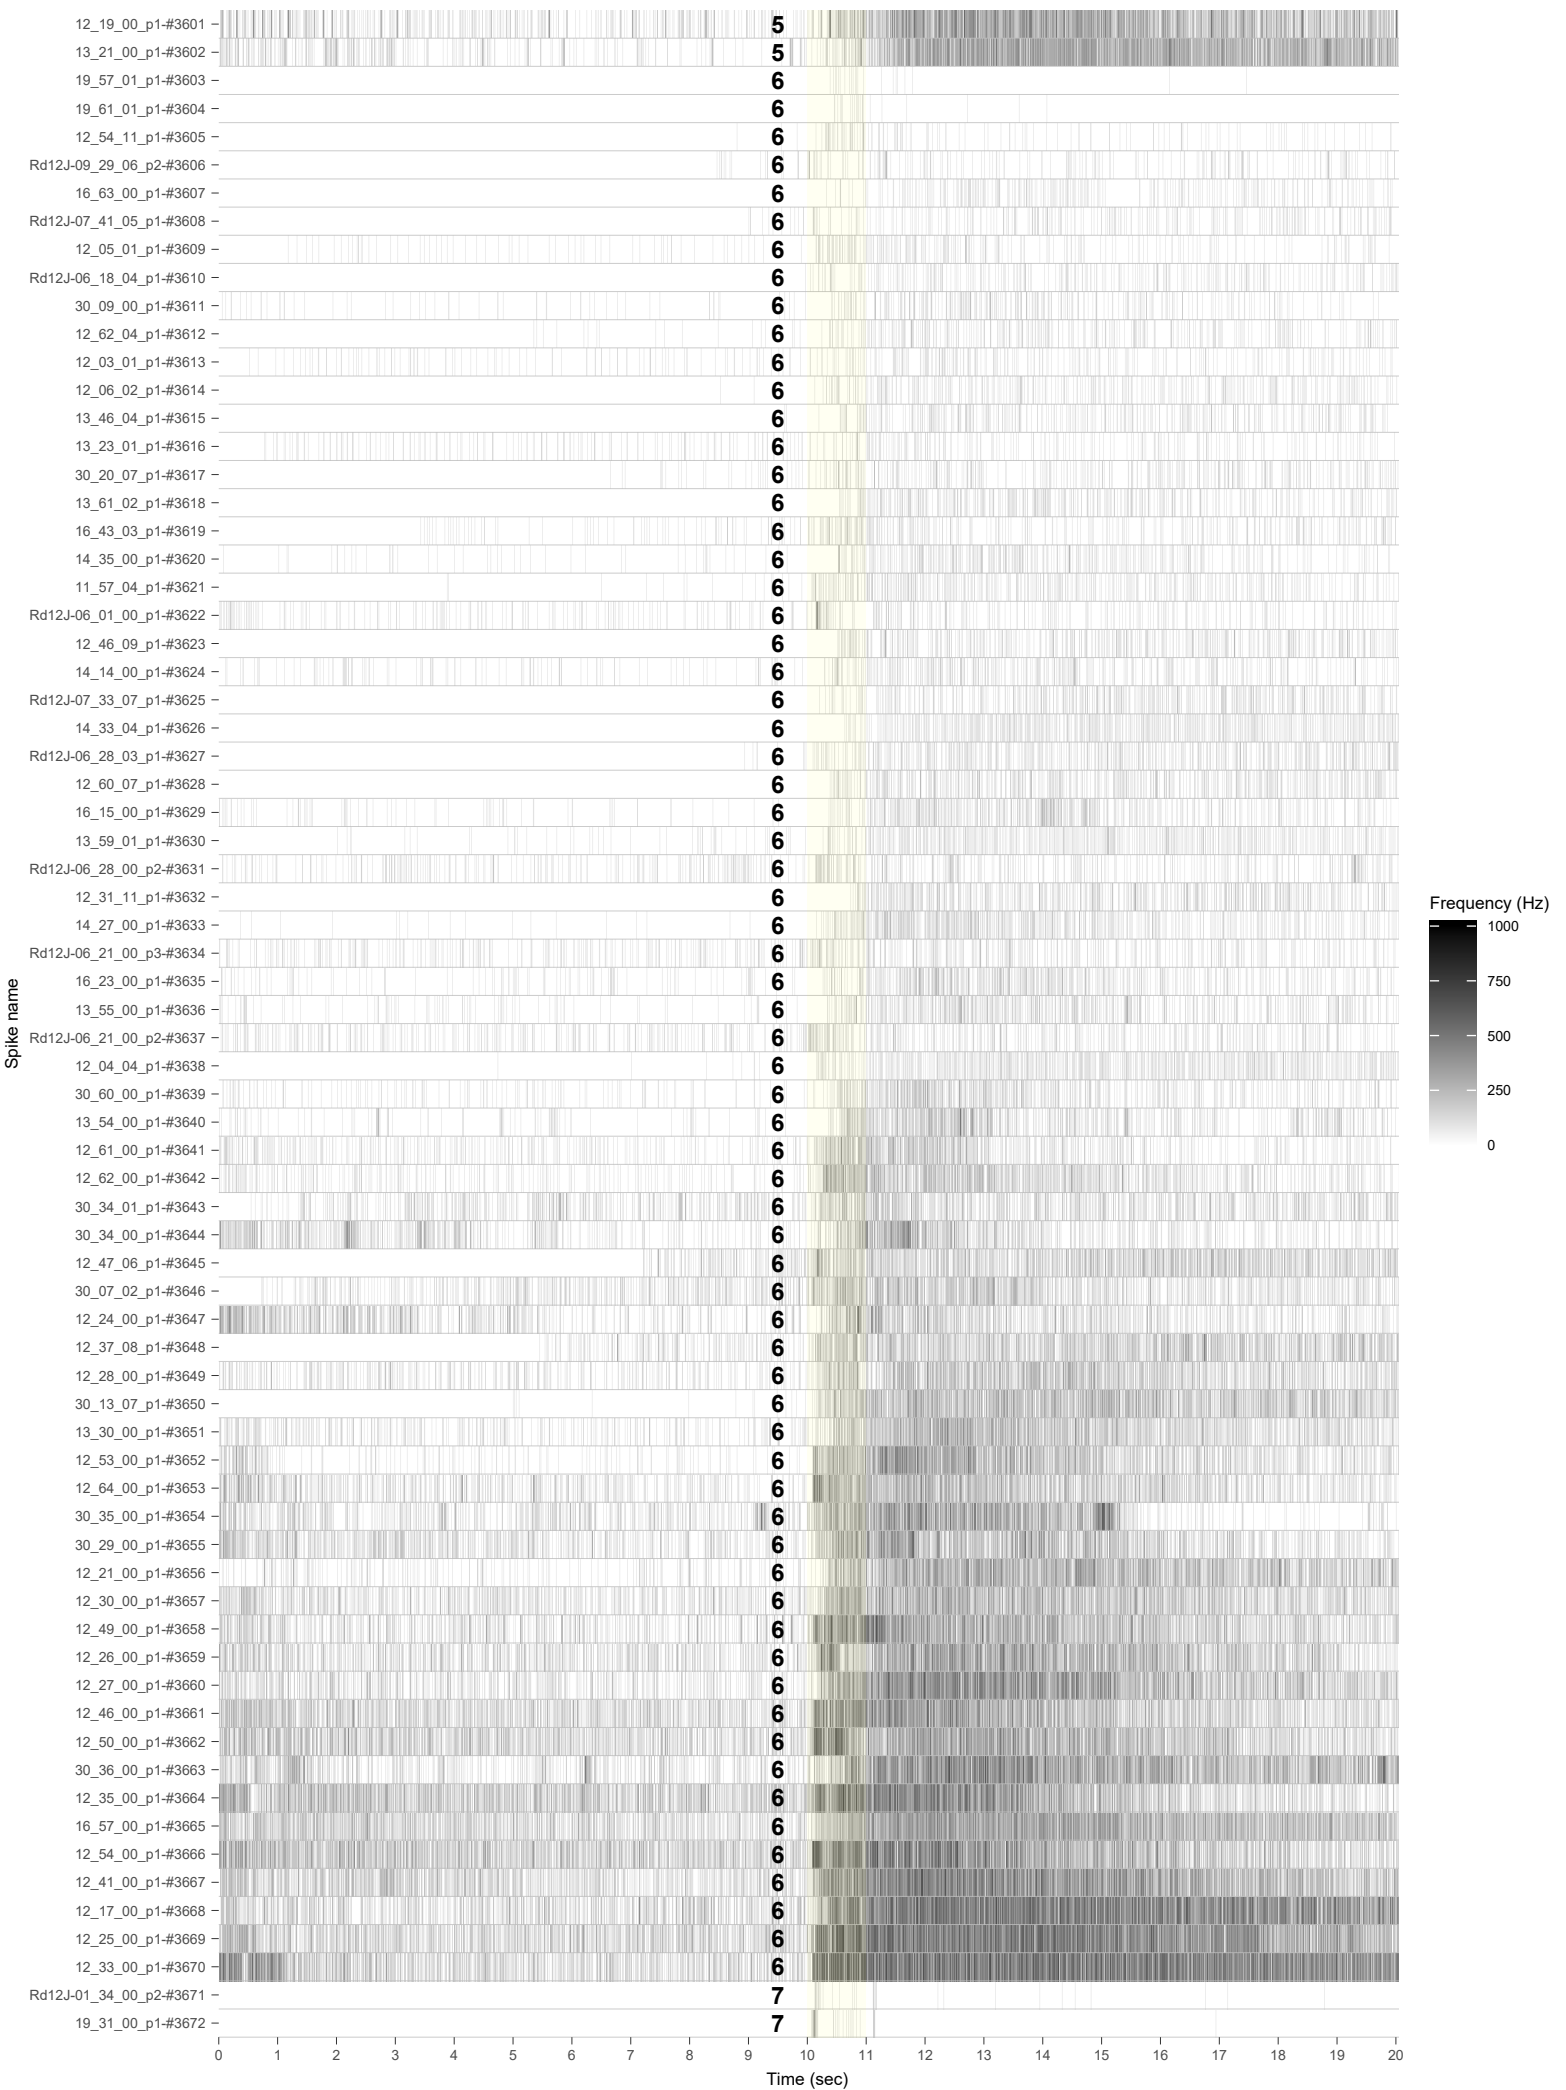

# Teaching dataset: Automatic clustering + Mandai modification (20160623125739) (page 52/54)

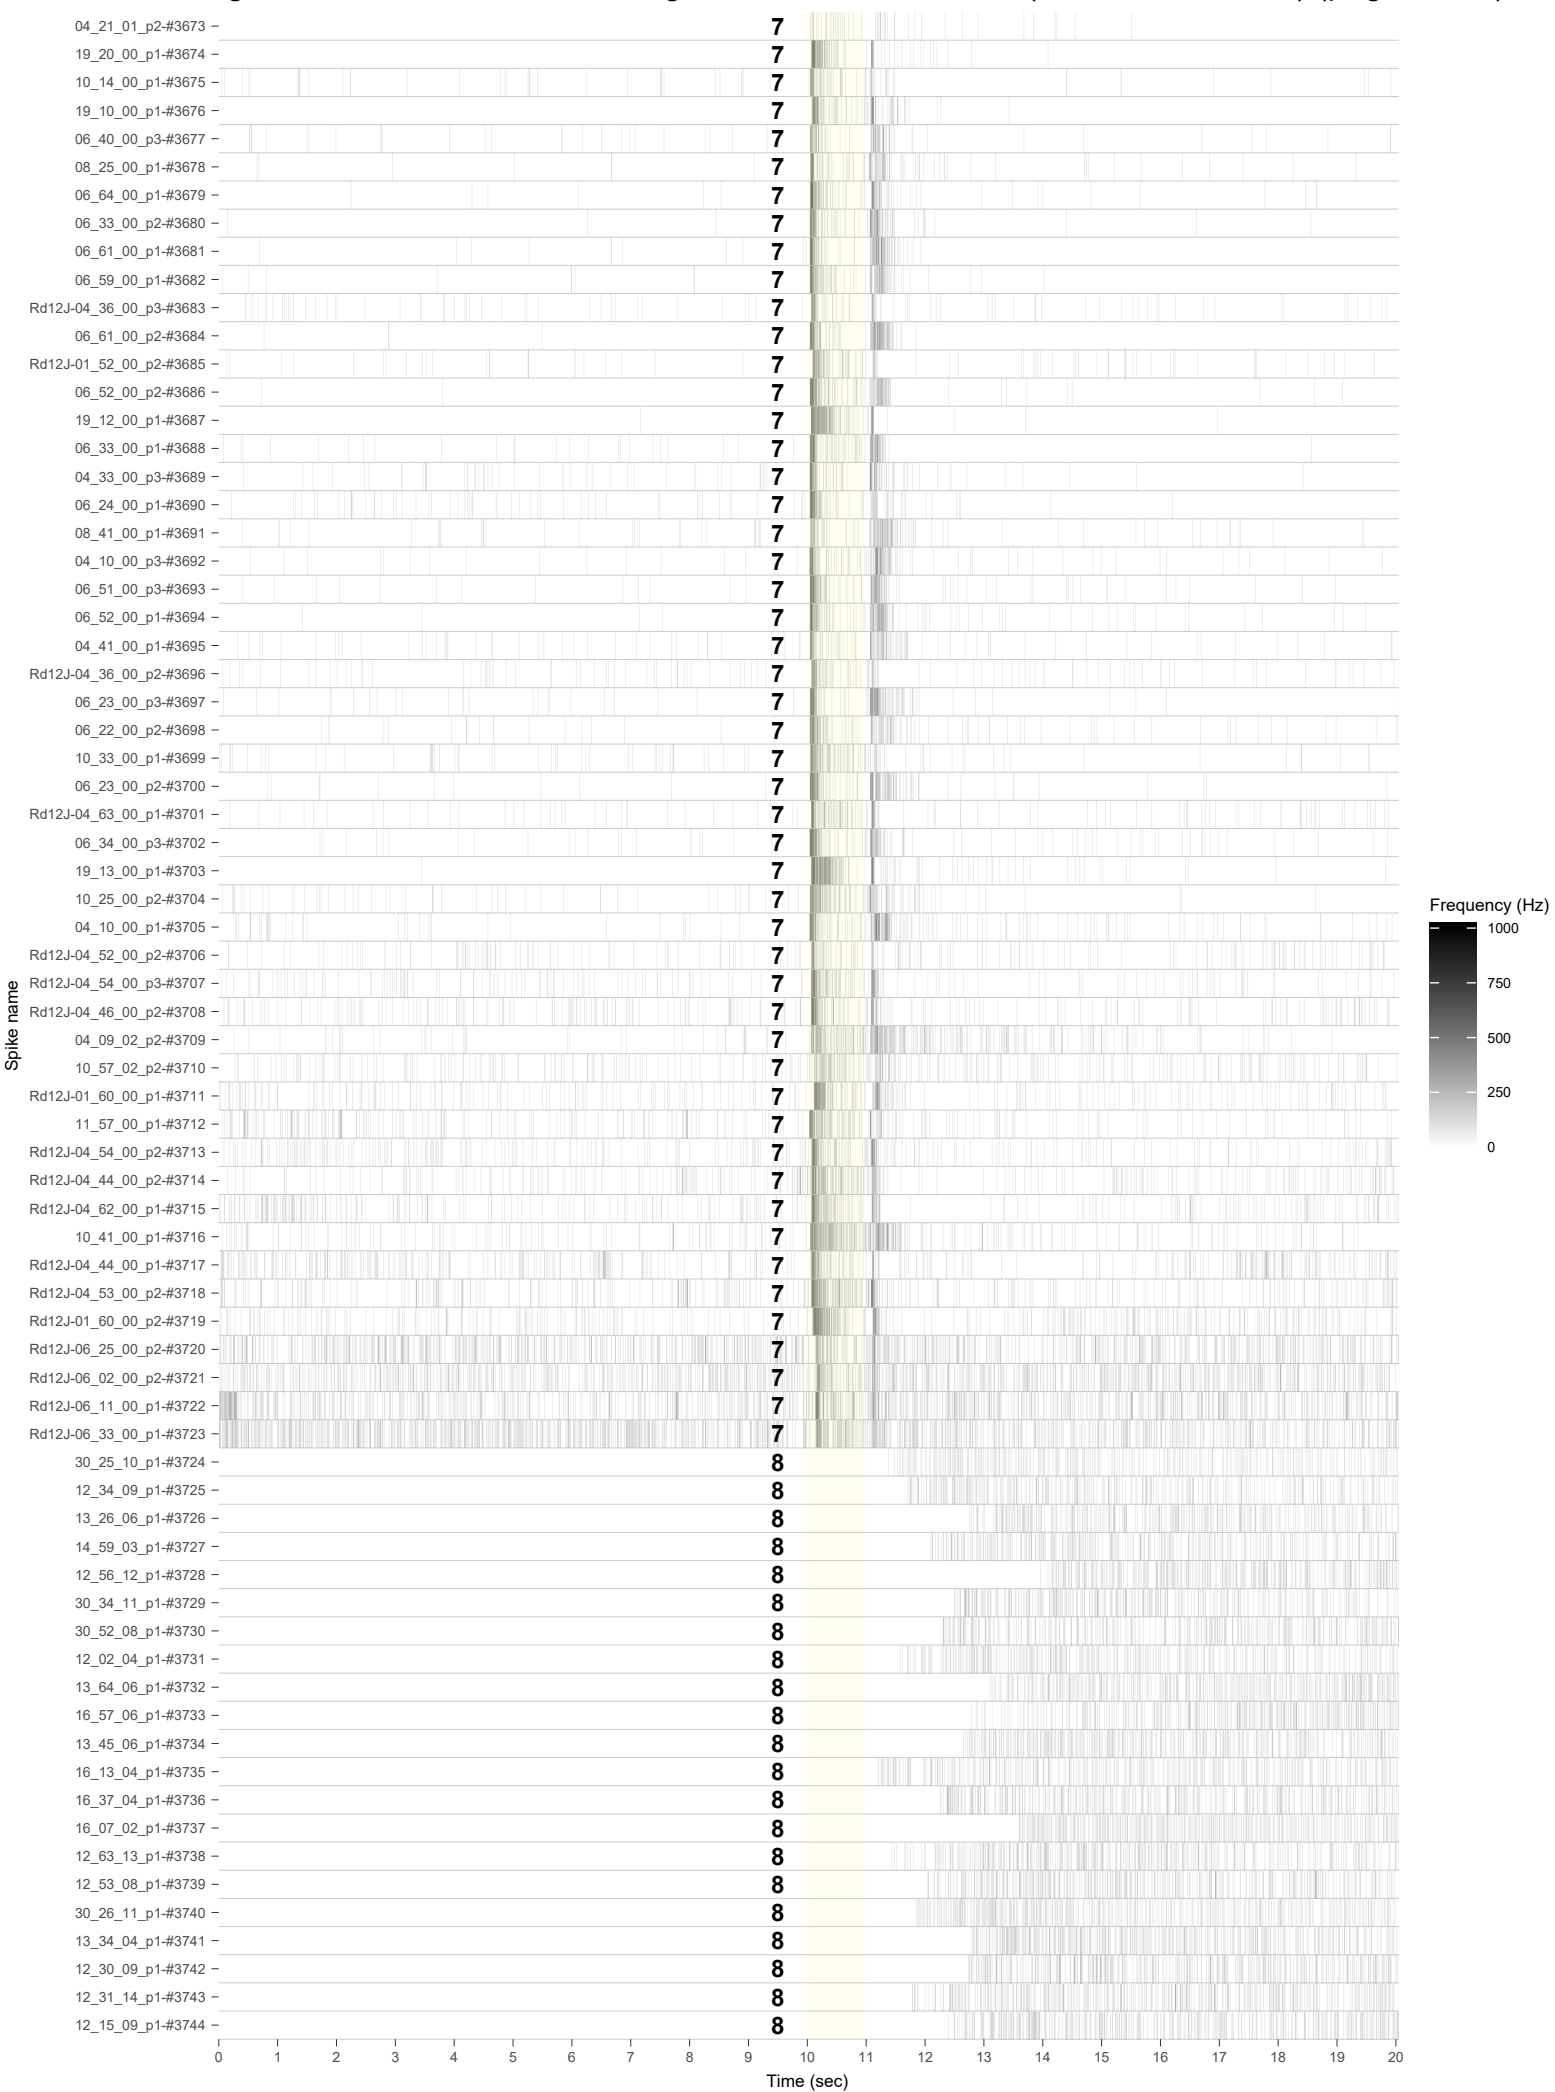

# Teaching dataset: Automatic clustering + Mandai modification (20160623125739) (page 53/54)

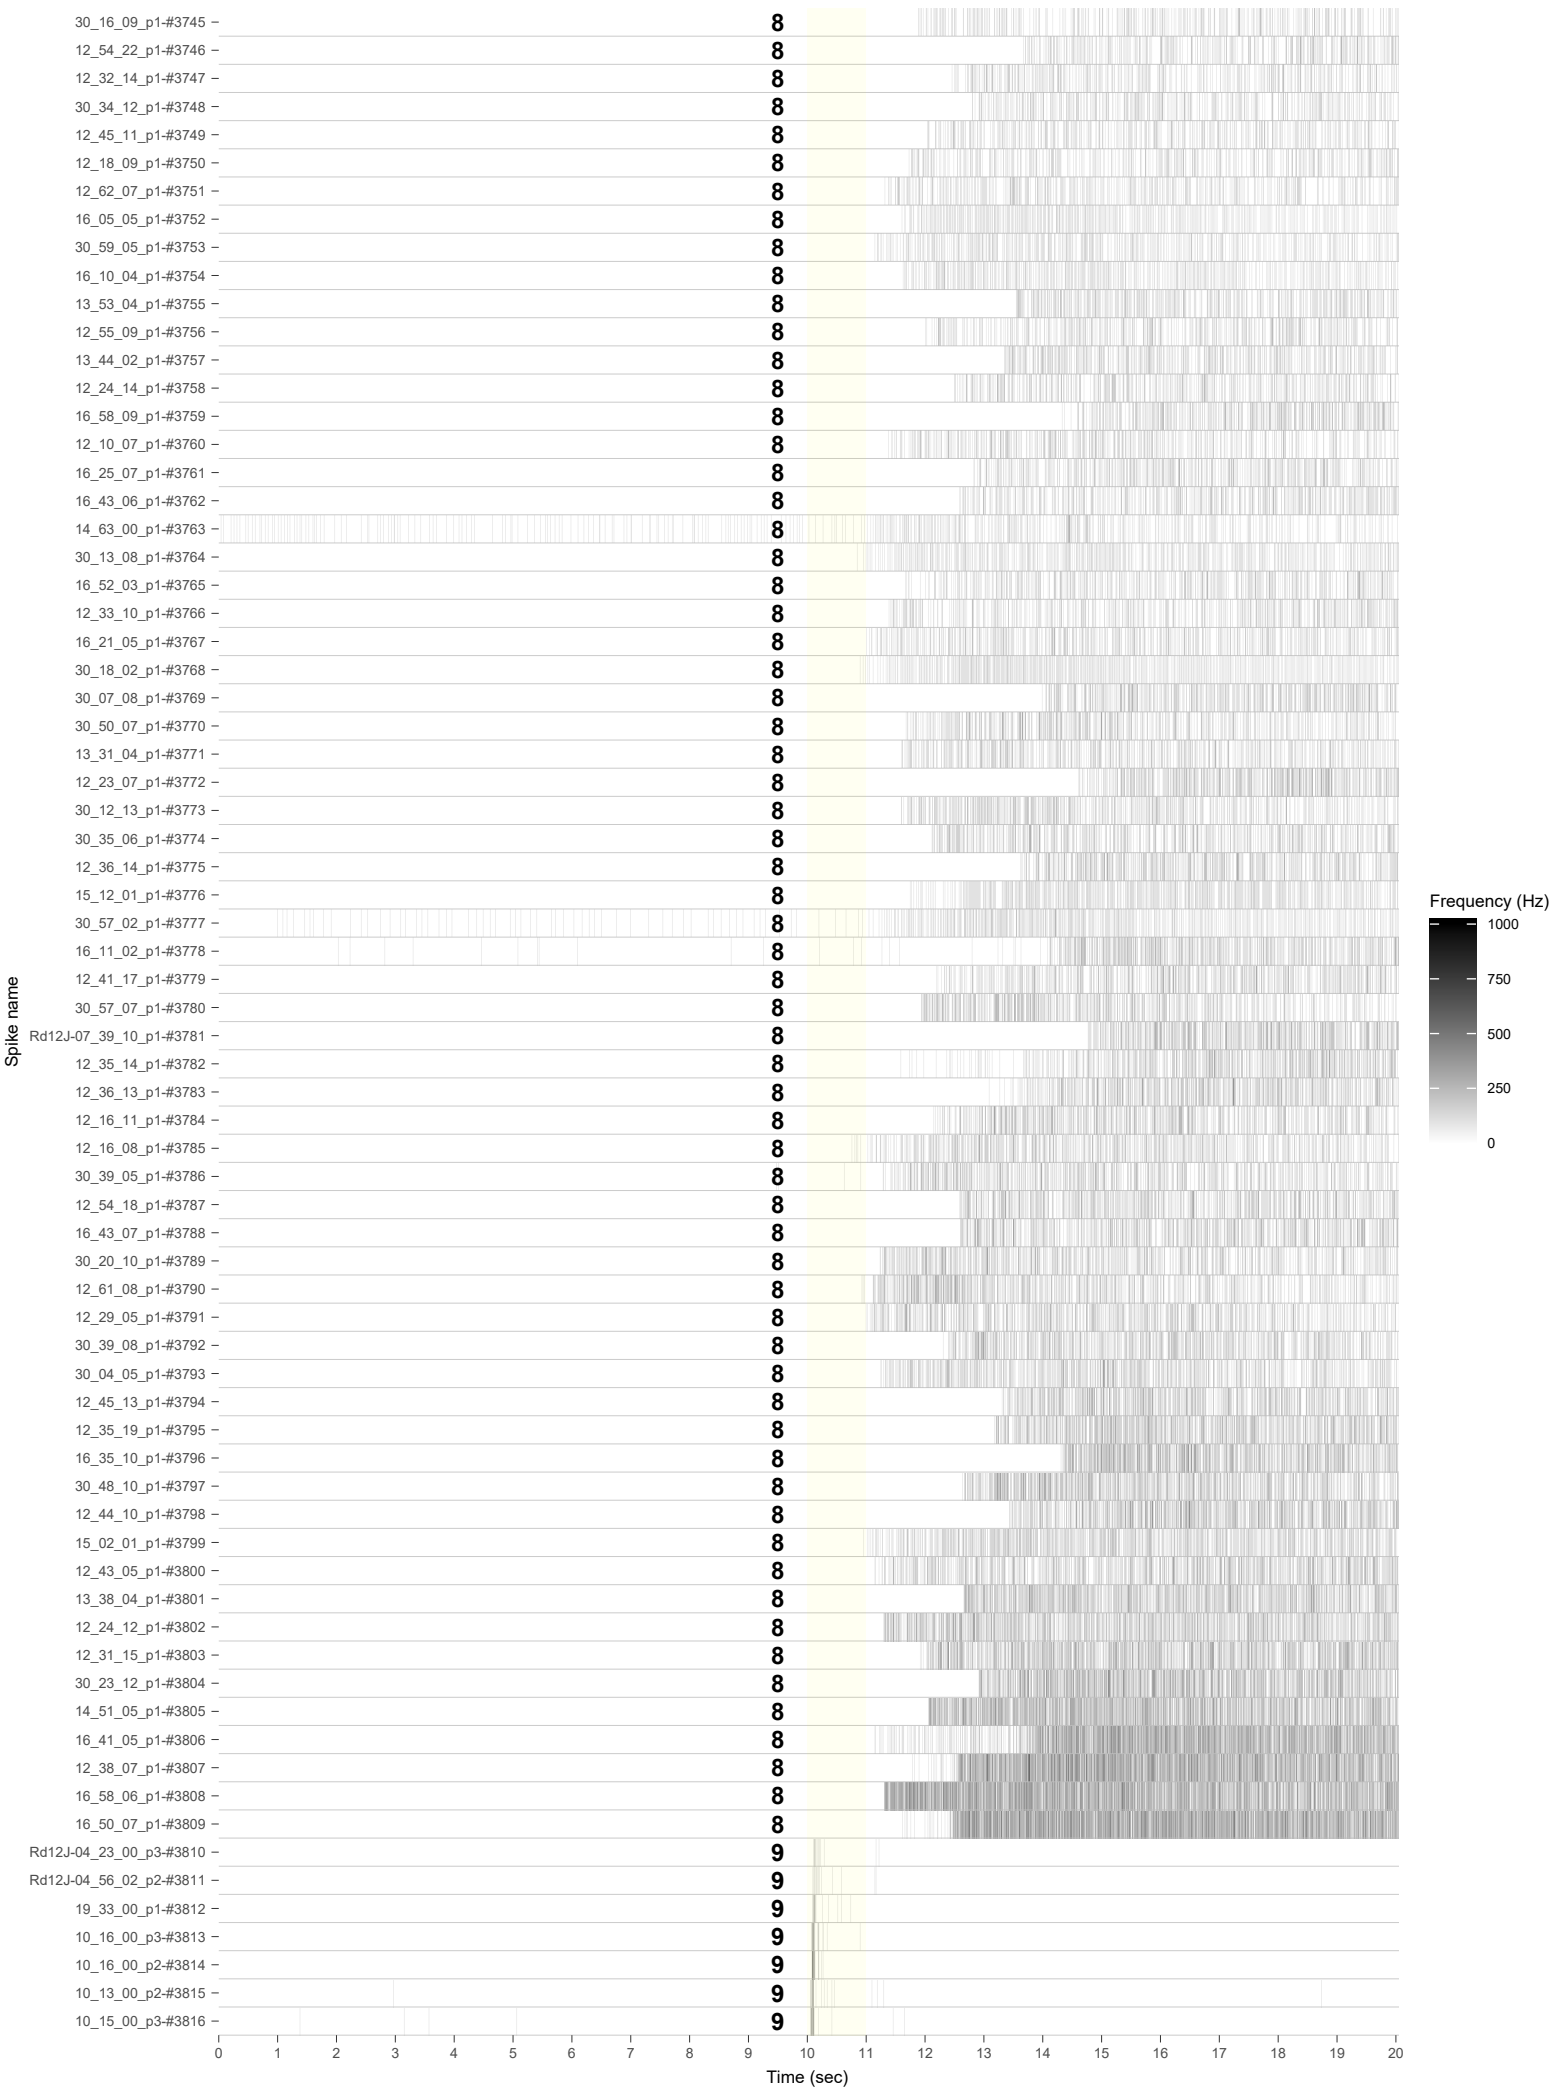

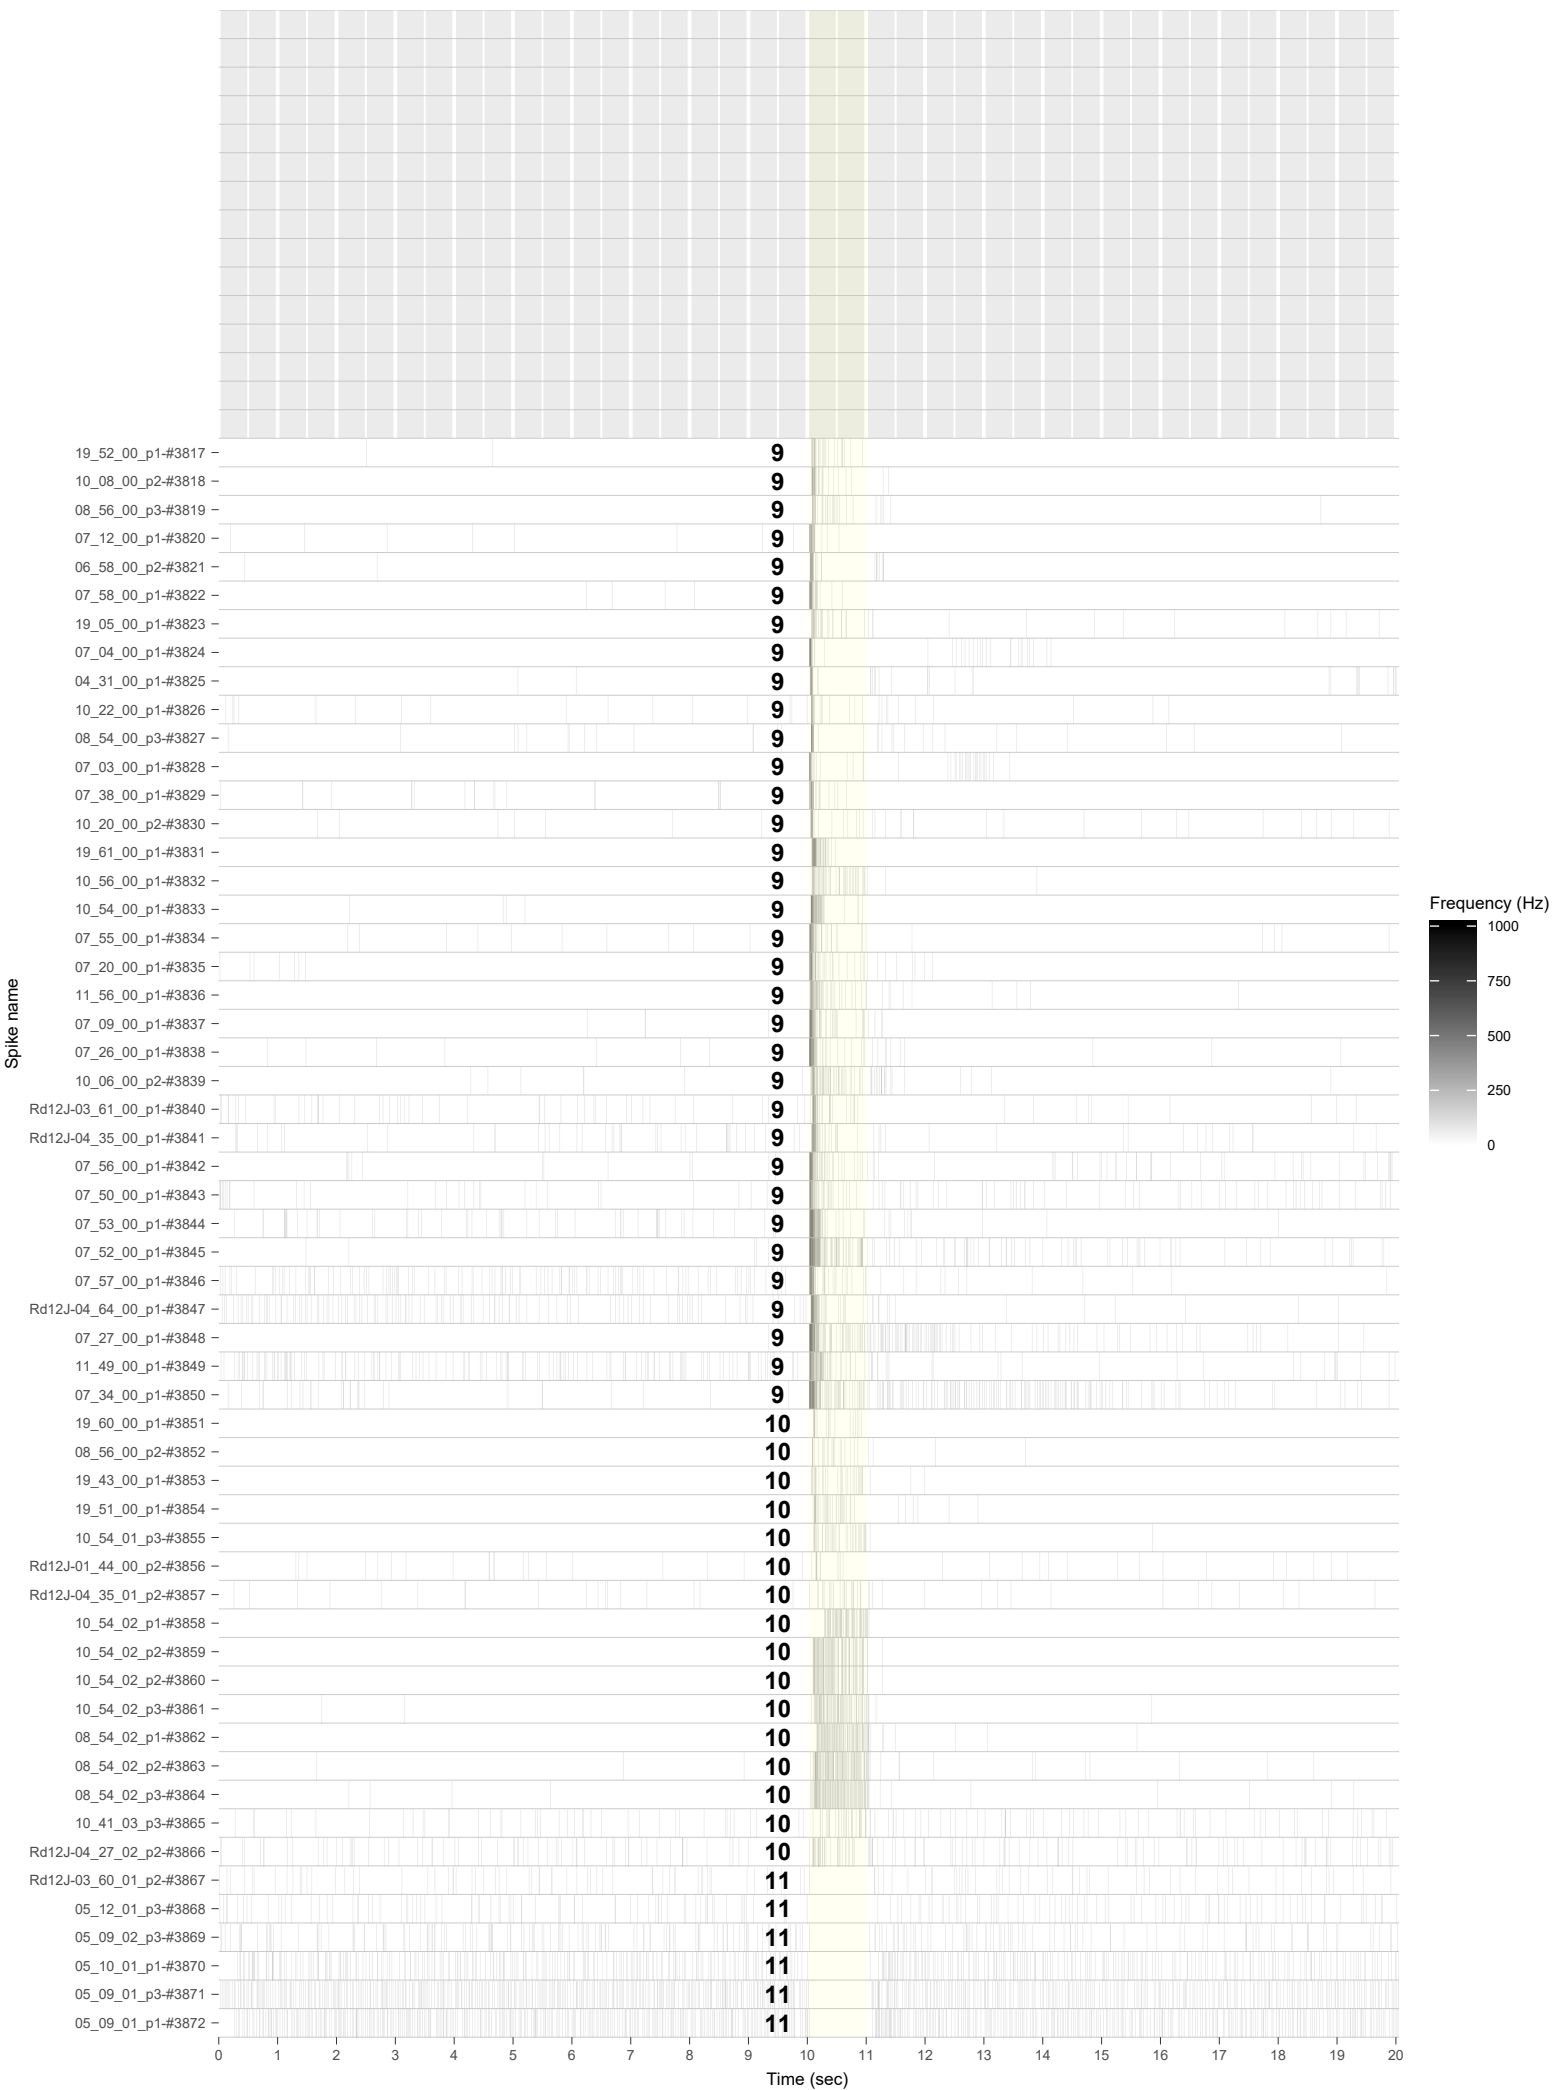

Supplement: mmc3.pdf [file mmc3.pdf]
